# Supplementary material for: Mapping the MHC Class I–Spliced Immunopeptidome of Cancer Cells
Source: Oxford University Press journal article supplement (doi:10.1158/2326-6066.cir-18-0424), 2018-11-13
Supplement: 23266066cir180424-sup-204067_2_supp_5137430_phqzhq.xlsx [file 23266066cir180424-sup-204067_2_supp_5137430_phqzhq.xlsx]

## Sheet: info
annotation:	|uniprot identifier|[Nterm position_P1_P1'_Cterm position]
	if more than one annotation is possible, annotations are separated by '';"

## Sheet: GRLCL nonspliced
sequence	annotation
SPAPPPPAV	|Q14814|[450_458]
SPLPAGNAL	|Q86SX3|[62_70]
SPQSPGDAL	|Q96KR1|[960_968]
APSPLQPAL	|Q9BW85|[218_226]
NPASPPLSL	|Q13155|[127_135]
APALPGPQF	|Q16633|[197_205]
APAPPPEEV	|Q8IVF7|[507_515]
IPPPPPPAM	|Q9NTJ3|[65_73]
TPLSSTVTL	|P12004|[219_227]
SPQSNSPVL	|Q96FZ2|[45_53]
YPAAVPQAL	|Q9H0Z9|[207_215]
FGSVKIAAF	|Q5SR56|[285_293]
SPQAPTLQV	|Q12772|[106_114]
TPIQGTSEL	|Q13761|[231_239]
APAQPQPQL	|Q9UIF9|[1229_1237]
SPQQVSAQL	|Q2TAL8|[111_119]
LPAPPTQNM	|O75177|[75_83];|Q15532|[75_83]
CPEGTKPML	|Q9H7B2|[135_143]
LSEPSSLQY	|P04035|[503_511]
SVDPTQTEY	|O75534|[607_615]
QTDPVTLQY	|Q9BYK8|[612_620]
TTEVVNELY	|Q969X5|[49_57]
DSDMQTLVY	|Q9UID3|[101_109]
FTEEQAVLY	|Q9UHB9|[225_233]
GPNGGIVTSL	|Q9HCN4|[86_95]
SPAAPSPLAL	|Q9P270|[462_471]
SPSSVTGNAL	|Q9NYB0|[154_163]
APAQTPAPAL	|O00303|[68_77]
SPSPPPGTSL	|Q6WKZ4|[1082_1091]
SPMPGTLTAL	|O60671|[99_108]
VPLGGQQVPL	|P80217|[200_209]
SPLPVGQNSL	|Q6IQ32|[336_345]
APAPPPEEVL	|Q8IVF7|[507_516]
APAQPPSQTF	|P51825|[265_274]
AVDPTSGQLY	|Q8TEM1|[1259_1268]
SSDPASQLSY	|Q08050|[581_590]
QPSPVSNQSL	|Q6FIF0|[86_95]
ITESSGFLAY	|Q15782|[295_304]
VIDSAELQAY	|P78527|[3433_3442]
LTDPIQGTEY	|Q9UDY8|[560_569]
PTEISQSLLY	|Q92508|[898_907]
RRKDGVFLYF	|P62829|[89_98]
SPSPINSSQAL	|P49790|[498_508]
QTDIQGALSAY	|Q6PD62|[424_434]
STDGEVETQVY	|P12270|[1876_1886]
ATEESDLAQQY	|P07237|[84_94]
QTETGTPYMLY	|P23921|[397_407]
GTDNPLSGGDQY	|P13010|[63_74]
VSDIVGPDGLVY	|P22087|[177_188]
LTDPSSPTISSY	|Q8IX90|[341_352]
QSDLTTLTSAAY	|Q13227|[105_116]
YSDPSTGEPATY	|Q15149|[3318_3329]
LLGPIGAGK	|Q8TCB0|[191_199]
AVRIPGGPA	|P09958|[35_43]
GPRPAAIAV	|P11166|[398_406]
APGGGRLLL	|Q68E01|[30_38]
SPAGLKAVL	|Q6P9B9|[681_689]
VPKVVGSAV	|Q9Y5A9|[203_211]
SPSGAMSNL	|Q8NFD5|[1300_1308]
LPAPKGPAL	|Q92733|[42_50]
APRPPVSAA	|Q8TF74|[122_130]
APAGPRLAL	|Q5FWE3|[496_504]
APIAKVGVL	|Q9UHB6|[496_504]
APGPPGRSM	|Q8IY67|[298_306]
ALLSPGSPK	|Q9H9L7|[16_24]
LARPASAAL	|P40926|[5_13]
VLGGVLGQK	|O60266|[420_428]
ITGPNMGGK	|P43246|[667_675];|P20585|[894_902]
TPSAGKAML	|P46013|[1167_1175]
VIFTGGVGK	|Q9Y6K0|[268_276]
APASPADHL	|Q6WKZ4|[877_885]
SPGSPRPAL	|Q9H211|[391_399]
APILRAAGL	|P0CG12|[276_284]
VPNAGRGLV	|P27695|[172_180]
SPSPLRAGV	|A6NED2|[31_39]
AARPATSTL	|Q04637|[1112_1120]
TPRPPGPGL	|Q8NEZ4|[2275_2283]
RPAPLPAAV	|Q6ZRI6|[658_666]
GVSAATFLK	|Q99613|[190_198];|B5ME19|[190_198]
GVRPPAPSL	|Q92673|[1840_1848]
APSSPRPAL	|P05362|[2_10]
VPRLPATAA	|Q01581|[500_508]
SPALPGLKL	|O14836|[147_155]
GRAPVLVAL	|O75365|[109_117];|Q93096|[109_117];|Q12974|[106_114]
ILAAPGILK	|Q9NRW4|[168_176]
SPTHPSSAL	|P98175|[541_549]
GLGEPLALK	|Q8IXM6|[176_184]
APRTVALTA	|P04440|[9_17]
TIAPALVSK	|P06733|[72_80]
SPAKNPSSL	|Q9GZR7|[60_68]
SPAIGRTSI	|Q9C0D2|[1856_1864]
KPLGPTAAF	|O60331|[467_475]
SPSLSGLKL	|P49643|[170_178]
SVLGISTPK	|Q8N128|[123_131]
IVAGSLITK	|O75400|[225_233]
PVAPAVPPR	|Q96SQ7|[79_87]
TPAPPTHAL	|Q5SXM2|[1152_1160]
SPSSILSTL	|O95997|[181_189];|Q9NZH5|[181_189]
SLFGSPVAK	|Q9ULH7|[859_867]
TPHAVGVLL	|Q9UBM7|[334_342]
PAAGPQRVL	|Q9NQ31|[63_71]
TPSPARPAL	|Q9H211|[29_37]
IPEAGKALL	|Q70J99|[484_492]
APASRLLAL	|Q96S16|[72_80]
IIAIPTGVK	|P00395|[311_319]
APKPQGPAF	|Q99704|[422_430]
APSARQGIL	|O00750|[1011_1019]
NPASKVIAL	|P53675|[74_82];|Q00610|[74_82]
KPVSLGQAL	|O60341|[404_412]
IPKSAVGEL	|P05107|[337_345];|P26010|[363_371]
VPRVLGSSV	|Q07021|[8_16]
VPIATTAKL	|Q9H2M9|[1352_1360]
GPASRVSQL	|Q9H7N4|[1073_1081]
TPMGPGRTV	|O00214|[193_201]
TPSSRPASL	|Q96S82|[248_256]
TPTTGRAVL	|Q9BV44|[435_443]
IISSPLTGK	|Q9P275|[461_469]
LPKTGTVSL	|P49327|[925_933]
KPMEAASAI	|Q9BVP2|[332_340]
LTRPGSSSL	|Q9HB19|[315_323]
SPRIATTTA	|Q14980|[2087_2095]
SPASRSISL	|P32970|[134_142]
APNFKATAV	|Q06830|[12_20]
APSLKNAAF	|P24539|[14_22]
VPATPRLPA	|Q15035|[331_339]
APSPPLRAL	|Q14674|[328_336]
SPLSSHPVV	|Q8WUX9|[170_178]
APVAPHFAL	|Q8WU76|[161_169]
SPAPTHNSL	|P49327|[2326_2334]
SVASPFTSK	|Q4VNC1|[871_879];|Q9H7F0|[906_914];|Q4VNC0|[873_881]
SPRPVALAL	|Q8N201|[1372_1380]
IPAEGRVAL	|Q9UBQ7|[15_23]
APDVARALL	|O00468|[1216_1224]
LPTLKAAVI	|Q3ZCQ3|[88_96]
APAPSTVHF	|Q13118|[111_119]
ITDSAGHIL	|P49755|[76_84]
ILGPNLGDK	|Q8NB66|[2089_2097]
VARPLSTAL	|O14561|[28_36]
LPRSSAVVV	|Q14669|[512_520]
SPGARLITI	|P21964|[131_139]
IPLLGKSSL	|Q9NYP3|[544_552]
SPGPEKMAL	|O75995|[120_128]
GPSVLRSTL	|O75376|[1455_1463]
ALPALVMSK	|P36578|[132_140]
LAKDGVLTL	|P27816|[558_566]
AARVVLTSL	|Q16690|[104_112]
LPQKAGGFL	|P00558|[181_189]
SPAPPLLHV	|Q8N163|[124_132]
SPESVKATL	|Q96JM3|[214_222]
SPMVAKSTL	|P23921|[113_121]
LPASPAHQL	|Q8TEK3|[998_1006]
APGLIKTSF	|Q9BTZ2|[211_219];|P0CG22|[214_222]
TPDAMKAAM	|P02792|[93_101]
ALFDGVVSK	|Q8N442|[274_282]
APKPVQALL	|Q9UGK8|[374_382]
SPEVPKPAL	|Q2NKJ3|[753_761]
VISPPTVPK	|Q9H9Y6|[81_89]
TPSKPPAQL	|P18887|[257_265]
LPHSATVTL	|Q8WUA7|[168_176]
LPPPPPHAL	|Q9H1B7|[271_279]
APRQPGLMA	|Q9Y6H1|[49_57];|Q5T1J5|[49_57]
APAQRAQSL	|Q63ZY3|[349_357]
TPAVGRLEV	|Q53HL2|[171_179]
LPKISPSSL	|Q9Y4E8|[238_246]
VPRSASVLL	|Q9Y3Q3|[5_13]
SLSSPLNPK	|Q9UIG0|[327_335]
VVKNVGLTL	|Q14289|[909_917]
IPMTGKPSL	|Q9H9Y6|[598_606]
ALSTPVVEK	|P29084|[16_24]
VTDAVALRV	|O43427|[29_37]
AARAIISEL	|P78344|[647_655]
SPSGTILRL	|Q5T5C0|[846_854]
APLLRGAVF	|P49815|[289_297]
TPKMPGQSV	|Q8WYP5|[1764_1772]
APSRNGMVL	|P26373|[2_10]
LPSQKTASL	|Q14684|[585_593]
VIFVGANPK	|P0C7U1|[59_67];|Q9NR71|[674_682]
SPVRPAATF	|Q9Y618|[1913_1921]
MVFGAPVPK	|A6NHR9|[1889_1897]
SPLTKSISL	|Q12802|[1683_1691]
YAVSELAGH	|P36578|[52_60]
TLFASPLAK	|Q96HA1|[104_112]
IVFVTGNAK	|Q9BY32|[10_18]
ILGPMFSGK	|P04183|[24_32]
APRVPVQAL	|O75179|[744_752]
ASELKALGY	|Q12996|[538_546]
ATSKVALVY	|P06576|[261_269]
GRAPQVLVL	|Q9NR30|[258_266]
APFVSKSSM	|Q6ZSR9|[146_154]
APEERPAAL	|Q96BI1|[145_153]
IPAGERPTI	|Q96MX3|[185_193]
GTAQLTLLH	|Q2VPB7|[317_325]
KPAESLPVI	|Q8IWX5|[302_310]
ITAPPSRVL	|O00767|[20_28]
GPTEGRPQL	|O15235|[50_58]
IPANSSRPL	|Q9NYZ3|[340_348]
MPSPVSPKL	|Q9UHB7|[1053_1061]
VPSKPPMSL	|Q6AI12|[223_231]
IPAKPPVSF	|Q6PKC3|[92_100]
KPLSSLTPL	|O75914|[538_546];|Q13153|[525_533];|Q13177|[504_512]
AVILRALSL	|P20036|[12_20]
VPATDRNAL	|P60228|[158_166]
ATDPNILGR	|P78527|[4111_4119]
SPSLPSRTL	|O75140|[503_511]
LPSTRLGTL	|Q7KZF4|[772_780]
APARGLLLF	|Q9UBP0|[373_381]
ATEQPLTAK	|Q9H173|[278_286]
ILNVSAVDK	|P11142|[485_493]
NVRIATTAL	|Q13571|[16_24]
SVAQLLLSK	|P29375|[796_804]
NPMKAGTQL	|P06756|[715_723]
SPNSKVNTL	|P40939|[56_64]
IPKFAVATL	|P28072|[228_236]
VPRPPSNPP	|O43734|[387_395]
VNVVPTFGK	|P62861|[43_51]
KPANVFITA	|Q9HC98|[174_182];|Q8TDX7|[163_171]
LPYKAGLSL	|Q96P48|[868_876]
LPRPVPLVA	|Q9H1C4|[399_407]
LPRLPVPAV	|P50416|[171_179]
IPKPLNPAL	|P62952|[13_21]
FPSPSKTSL	|Q86XL3|[257_265]
STFSAPLNK	|Q9H6R7|[449_457]
ATAVAQLYK	|Q14CZ0|[67_75]
GTYVSSVPR	|P06340|[242_250]
SPHVVQSVI	|O94915|[212_220]
SPAPPQEKL	|O75376|[1981_1989]
SPEAPKPQL	|Q4KMP7|[97_105]
LTGPVMPVR	|P26373|[150_158]
TPRSPVVTI	|P46199|[177_185]
ALSNPILNK	|Q6PIW4|[268_276]
TPISRLVAL	|Q9H765|[186_194]
VPESIKNAL	|O95861|[298_306]
SSYPNPVAH	|O75153|[850_858]
LPDSDKAIL	|Q9BXL7|[294_302]
VPAEPKLAF	|P18124|[83_91]
MPRGVVVTL	|Q9ULT8|[851_859]
FASHVSPEV	|Q9NP61|[152_160]
SPSKPNPVF	|Q16656|[136_144]
ITSPVVTQK	|P04035|[354_362]
TPMPSRPST	|P27816|[892_900]
SPWADNTAL	|P57076|[267_275]
VPRSSSMVL	|Q9H992|[124_132]
IPTSARSML	|Q8WXI9|[522_530]
TPSEPHPVL	|Q9Y5A9|[381_389]
SIFVPGTQK	|Q9BUB4|[114_122]
IINSSITTK	|P49368|[155_163]
SMNANTITK	|O43290|[792_800]
ATYPMPTAK	|O75179|[2027_2035]
RPAAIPIEI	|Q9Y2H1|[394_402]
LPHTVLTSL	|Q9BY78|[46_54]
PTSPKPLLQ	|Q5VZK9|[1252_1260]
IPISLHTSL	|Q5JSZ5|[1959_1967]
NVRPPNTAL	|Q17RS7|[767_775]
IVYPPPPAK	|Q9GZR1|[655_663]
QPAPTPLKM	|P36956|[101_109]
IPSIRNGIL	|Q93008|[1578_1586]
LPNGTRVPM	|P11309|[171_179]
ARLQTALLV	|Q9NRC6|[739_747]
LPKTTALEL	|P18583|[364_372]
APASPFRQL	|Q07021|[23_31]
APKSQIVML	|Q8TCS8|[221_229]
LVRDVVSSL	|Q9NQ55|[117_125]
AVYETPTAH	|Q9H0E2|[84_92]
KPSLPFTSL	|P31785|[3_11]
SPQKTMSVL	|Q12888|[1028_1036]
SPKPPTSMF	|Q99081|[213_221]
SIAPRMMSV	|P30876|[1166_1174]
QSDPAPLQH	|P29401|[189_197]
TVNSPAIYK	|Q9Y3A2|[238_246]
ARIPLNPVL	|O15524|[192_200]
QVQGPRPVL	|Q9UK96|[377_385]
SIDSLQLGY	|P50416|[490_498]
SVRPVPLEV	|Q8N3C0|[1516_1524]
APLLKNVQL	|Q9BRS2|[287_295]
IPASNRLLL	|Q2NKX8|[247_255]
LPQEAKQAL	|Q8NEB9|[341_349]
SPRDPVLTL	|Q86XL3|[512_520]
NPQLRSVAL	|Q9H469|[113_121]
IPRSITVLV	|P33993|[249_257]
APMTPKQIL	|Q8IXJ9|[27_35]
LPRIQSTAL	|Q13085|[836_844]
VVNSYPLAH	|Q9UHI6|[282_290]
APLQRSQSL	|Q8WUA7|[160_168]
LVMAPRTVL	|P01889|[2_10];|Q95365|[2_10];|Q29836|[2_10];|Q31610|[2_10];|P30460|[2_10];|P30480|[2_10];|Q31612|[2_10];|P30462|[2_10];|P30475|[2_10];|P30486|[2_10]
VMAPRTVLL	|P01889|[3_11];|Q95365|[3_11];|Q29836|[3_11];|Q31610|[3_11];|P30460|[3_11];|P30480|[3_11];|Q31612|[3_11];|P30462|[3_11];|P30475|[3_11];|P30486|[3_11]
AVYLLPVPK	|P42694|[533_541]
AVNGVQLHY	|Q86WA6|[45_53]
LPKNPSVVF	|O94915|[2375_2383]
GTMTGMLYK	|Q5SRD1|[161_169];|O14925|[161_169]
KPVYPGQTL	|P51659|[565_573]
CVKEIGLLK	|Q9HC98|[90_98]
ALFGQPPFK	|P41252|[577_585]
LTDPEAAKY	|P04062|[335_343]
TLDTKPGLY	|Q8NEG7|[374_382]
AIIERTASF	|Q12872|[210_218]
LLFSATMPK	|Q9UJV9|[372_380]
ALFLTLTTK	|P00403|[41_49]
MPHVPITTL	|Q6KC79|[5_13]
APREDPVLL	|Q7LBC6|[99_107]
LTQPQVVAR	|A8MWL6|[21_29];|O43760|[21_29]
APAERQIDL	|Q29RF7|[1327_1335]
LPSSRQLVL	|O75165|[1826_1834]
VMAPRTLLL	|P04439|[3_11];|P30443|[3_11];|P13746|[3_11];|P16190|[3_11];|P30455|[3_11];|P16188|[3_11];|P10314|[3_11];|P30512|[3_11];|P16189|[3_11];|P30459|[3_11];|Q07000|[3_11]
TPMATRLLL	|Q8WUM0|[632_640]
KVCNPIITK	|P11142|[601_609]
PTDPKVVVY	|Q9Y4K1|[1215_1223]
IPKQVSISF	|Q96D46|[46_54]
STMGYMMAK	|Q58FF7|[488_496];|P08238|[615_623]
IPNEIIHAL	|P52272|[189_197]
KVANIILSY	|Q96JI7|[1273_1281]
TPSPTRYSL	|P49792|[779_787]
IPMAKSYVL	|Q96RL7|[1901_1909]
VPRALQPQL	|Q9H4B4|[521_529]
FTSPPSLFK	|Q6UN15|[257_265]
AMLDTVVFK	|O00487|[302_310]
VSFPIGIYK	|Q8TCA0|[35_43]
NTDLGNDLY	|Q8WVC0|[366_374]
YTAVVPLVY	|P01591|[132_140]
LPQGIVREL	|P63272|[93_101]
LIKETTTGY	|P42166|[313_321]
APRVLQQTL	|O95373|[318_326]
IPRQVAQTL	|Q14703|[189_197]
LPKVQSIQL	|A2VDJ0|[208_216]
LTDADAMKY	|P25705|[263_271]
LPQANRDTL	|Q9H0H5|[465_473]
VPFERPAVI	|Q9UKS7|[258_266]
EPQPERSSV	|Q5VY09|[99_107]
TPQSNRPVM	|P24928|[527_535]
EVDPDTILK	|Q9BY77|[392_400]
APYPVIKEL	|Q8IZA0|[301_309]
GLTDVILYH	|O60506|[269_277]
IPNFPRSTV	|P00491|[53_61]
FSEQVAMGY	|Q9P258|[485_493]
VPSTERMVL	|P17480|[319_327]
LPRPPPPEM	|Q00325|[342_350]
IIFQGQSLK	|P26368|[217_225]
AMADTFLEH	|P14618|[21_29];|P30613|[64_72]
QAADILLYK	|Q9UGM6|[164_172]
YTDATPLRV	|Q8N8A6|[304_312]
LVEKSQLGY	|Q9C0D7|[875_883]
LPKQPPLML	|Q6VN20|[582_590]
AINSKQLTY	|O75365|[140_148]
SPREPLEPL	|Q9HC77|[1125_1133]
LPRQPPMSL	|Q13045|[882_890]
IPRLIVSQL	|Q9BXW9|[172_180]
RPKSNIVLL	|P11836|[222_230]
QPRFAPVLI	|Q8TED0|[431_439]
LPDERTISL	|Q05048|[370_378]
ILYAAPQLR	|P15391|[506_514]
TPETVRMVL	|P29218|[168_176]
LSDSFSDLY	|Q9BTX1|[58_66]
QPNPLPLRL	|Q15154|[1900_1908]
YPAQITPKM	|Q9NX74|[364_372]
SPQKVTLYL	|P05107|[99_107]
VIDQQNGLY	|P27694|[490_498]
DSDGSFFLY	|P01860|[329_337];|P01857|[282_290];|P01861|[279_287];|P01859|[278_286]
QPRLVPQTI	|Q5JSZ5|[1936_1944]
AVAEKMLQY	|Q9NSY2|[12_20]
VLNDYSLTK	|Q9UKT9|[25_33]
TPEEVRLPL	|Q9UIF9|[548_556]
TTDTVIRSY	|Q9NVD3|[84_92]
APSQQRQQI	|Q6P2Q9|[2018_2026]
TYVPVTTFK	|P62899|[107_115]
STDHIPILY	|Q06210|[218_226]
LLNYAPLEK	|P62875|[59_67]
QLYSTILSH	|Q9Y4H4|[106_114]
YPLESRPSL	|Q14980|[1938_1946]
NVYEVVNPK	|Q86YQ8|[263_271]
QLTSVQLLY	|Q96RL7|[712_720]
YPHQVPLVL	|Q14997|[1635_1643]
YRLICKGTI	|Q9ULG1|[1222_1230]
LTDLVDDNY	|Q6P2Q9|[246_254]
ATDLTREVY	|Q8IWV8|[31_39]
FVDPLVTNY	|Q9H3H1|[85_93]
MTQQPRPVL	|Q9NPE3|[56_64]
ESDEVELSY	|Q00839|[413_421]
NVDPVQHTY	|O00468|[56_64]
TLNPQMLQK	|Q9NVU7|[441_449]
STSQTFIYK	|O60341|[609_617]
SPYQNIKIL	|P52788|[145_153]
FAFVTDNTY	|P14635|[269_277]
GTLDYILQR	|Q9C0B1|[329_337]
ETALLVDRY	|Q12996|[520_528]
MVDPLLTKY	|Q9H5Z1|[162_170]
NTDNLLTEY	|Q9Y2F5|[46_54]
LTDDKLSQY	|P42336|[623_631]
YILSPLSYK	|Q8WUT9|[300_308]
TTESEVMKY	|P11586|[76_84]
SVDSQILYY	|Q96S52|[269_277]
VPSEQRQML	|Q15572|[807_815]
TTEVHPELY	|Q9Y282|[51_59]
YSESSQLLY	|P09884|[732_740]
VLYENPNLK	|Q14204|[3839_3847]
PTDENLLKY	|Q9P015|[285_293]
QTYGQQLQK	|P20591|[606_614]
ALYQPLFDK	|Q99733|[97_105]
QTDTLQNDY	|P14921|[215_223]
TLYPYTSQK	|Q9P2A4|[315_323]
QTLSTQLWK	|Q8IYB5|[459_467]
LTEQRALLY	|O15040|[950_958]
QLEDEALKY	|Q96IG2|[207_215]
QVAQMQLKY	|P19623|[270_278]
VTEIDQDKY	|P21333|[2380_2388]
ITEDKTELY	|Q63HN8|[4163_4171]
SIYYVDVQK	|Q8TBC3|[345_353]
IMEKSTMLY	|O75475|[412_420]
ETTFLVDKY	|P48444|[500_508]
VLDPYLLKY	|Q9Y2R5|[34_42]
FLQQPRPLM	|Q8N6F7|[160_168]
NLDIIQQEY	|Q8IWA0|[371_379]
YVDPQFLTY	|O43164|[568_576];|Q8NG27|[529_537]
IPMMRQQEL	|Q96NB2|[192_200]
LLLEPYNKY	|P35579|[292_300]
SSEQTFMYY	|P11926|[309_317]
LTEEETQFY	|Q9Y2H1|[185_193];|Q15208|[184_192]
TTDFIYQLY	|Q01813|[646_654]
VVYEKQMLY	|P20701|[1083_1091]
FLEQVHQLY	|P42224|[14_22]
YLDQMEDLY	|O43681|[302_310]
FTEQYNEQY	|Q9BQ04|[186_194]
GPRAGGSVVL	|Q9Y2E6|[37_46]
ISAGAVLGKV	|P18577|[125_134]
APSGGRLLSA	|Q9NRG9|[253_262]
APRGTGIVSA	|P15880|[198_207]
APAEKVGGVL	|Q9NPG3|[701_710]
ATVAVPLVGK	|Q9BUN8|[21_30]
APAGGSPRML	|Q7L0R7|[74_83]
VPKSASVSAL	|O60307|[893_902]
APIIRVGGAL	|O60566|[240_249]
TPRPSSPGGL	|Q5R372|[114_123]
GPRTAALGLL	|Q14257|[4_13]
APAPSKGQTL	|Q6ZRI6|[177_186]
GIYPPGSPGK	|O95295|[127_136]
VLIGDGAGFK	|P11310|[262_271]
APKIAASSSF	|Q99961|[280_289]
SPAPPSSHSL	|Q9P219|[1847_1856]
APAPAEKTPV	|P10412|[11_20]
APGPPGRSML	|Q8IY67|[298_307]
KPAASPLTSL	|Q92615|[394_403]
APAKNIATSL	|O00213|[486_495]
TPSKPSGLSL	|Q96NB3|[146_155]
APRSVAVSSI	|Q6UWB1|[322_331]
APSMDRAAVA	|Q9H0P0|[3_12]
RPAPLPAAVV	|Q6ZRI6|[658_667]
ATGDMSGLLK	|Q13685|[150_159]
APSSPRPALP	|P05362|[2_11]
APPLRPSAAL	|Q14155|[658_667];|Q15052|[597_606]
ATQVAVSVPK	|Q04637|[504_513]
LLYGPPGTGK	|Q5T9A4|[349_358];|Q5T2N8|[174_183];|Q8IYT4|[291_300];|O43933|[878_887];|P62333|[171_180];|P62195|[187_196];|P40937|[57_66];|Q8NB90|[391_400];|P55072|[242_251]
APHEPDGVAL	|O14576|[313_322];|Q13409|[305_314]
GLYAGDPVSK	|Q9UJJ7|[154_163]
VLSTSTGLTK	|Q5T8P6|[687_696]
RPAAPGQTPL	|Q12796|[168_177]
AVISPPTVPK	|Q9H9Y6|[80_89]
MPPSGPRGTL	|Q02818|[1_10]
LPRGSSPSVL	|Q9GZN2|[105_114]
IVPDIAVGTK	|P26599|[4_13]
APRTVALTAL	|P04440|[9_18]
APSAARELSL	|Q9H668|[100_109]
VPRTVSSTTA	|Q15398|[216_225]
SPHPPSEVTA	|Q9H000|[80_89]
VTSGDPPLLK	|Q96T49|[539_548]
LPRETVAGAL	|O95400|[166_175]
SPRDSPAVSL	|Q14687|[909_918]
KPMEAASAIL	|Q9BVP2|[332_341]
VPRPPSNPPA	|O43734|[387_396]
TPAPSRTASF	|P53396|[447_456]
SPRPALPALL	|P05362|[5_14]
FLDASGAKLD	|Q7L1Q6|[53_62]
TPNPVGRLAL	|Q15058|[81_90]
APARPLSTNL	|Q6UB99|[1778_1787]
VPRAPGSLMI	|O15037|[112_121]
TPMDSTGVPH	|Q5JRX3|[95_104]
GMYDSSLAAK	|O15254|[111_120]
SPRISPATTL	|Q8IVW6|[377_386]
SPIKVTLATL	|P06748|[70_79]
SVASTPISQR	|Q9BXS6|[240_249]
TPTSAPRSVM	|Q9NQS7|[507_516]
APRVPVQALP	|O75179|[744_753]
LPPAQVHSSL	|Q86YV0|[752_761]
SPMNKSPSAM	|O60343|[782_791]
LSDPSGPKSY	|Q96S38|[752_761]
APIGPHLQSM	|Q14152|[505_514]
IPSSVIHPAM	|Q9UI10|[198_207]
VPRGSTLPLL	|O75460|[307_316]
APKQELPSAL	|P17028|[201_210]
SVSPLEPPTK	|Q9UMZ2|[578_587]
VPRSASVLLL	|Q9Y3Q3|[5_14]
APREALAQTV	|Q99829|[492_501]
LPRAVGTQTL	|Q13596|[270_279]
APAQARPTVF	|Q9Y478|[73_82]
MILTNPVAAK	|Q9UGI8|[92_101]
SPMGTRSTLL	|P09958|[507_516]
APKSMQSAIM	|Q8N697|[480_489]
SPRTPPPLTV	|Q8TDY2|[667_676]
STDPSVLGKY	|Q14469|[101_110]
LPSPSPRISL	|Q8TBC3|[620_629]
SPQLGRAVQL	|Q8N2A8|[103_112]
APIQGSRNLL	|Q16665|[804_813]
TPAAVRELVL	|Q92688|[15_24]
APIDRVGQTI	|P52272|[499_508]
KPAPPFNVTV	|Q9HBE5|[119_128]
LINPSMIGPK	|Q9HBM6|[208_217]
LPSATRALEL	|P18583|[575_584]
ALIQQATTVK	|P32969|[159_168]
STLDIVLANK	|P23921|[119_128]
SPRPNIILGL	|Q9BTC0|[1184_1193]
IPRPVDGVEV	|P26368|[417_426]
VPRQPTVTSV	|Q96HC4|[203_212]
SPNQSLRLGL	|Q96B01|[327_336]
NPSALRETVV	|P55072|[460_469]
LVFPSEIVGK	|P62081|[133_142]
ITDSAGHILY	|P49755|[76_85]
SPTSVRQMAL	|Q96NB2|[139_148]
QMQLVDTKAG	|Q9NRR3|[75_84]
GPRSPSVIFM	|Q86VZ1|[53_62]
VLSSFVLAEK	|P49327|[2105_2114]
APSDNRVTSF	|Q9UNZ2|[66_75]
PSLSHNLLVD	|Q9ULA0|[466_475]
AAMLDTVVFK	|O00487|[301_310]
ATLPNQPVEK	|Q9NVI1|[1123_1132]
APSQQRLVVV	|Q9H6Q4|[105_114]
STGVFTTMEK	|P04406|[98_107]
RPMTTPPTSL	|Q6ICC9|[92_101]
IIFVGTPVQK	|P46013|[1310_1319]
SPSINRQTSI	|Q9UJ41|[302_311]
IPAKPPVSFF	|Q6PKC3|[92_101]
VIMNPPFGTK	|Q9NRN9|[123_132]
APREPPPVEL	|Q13105|[188_197]
ASEFPGAQHY	|Q9BRR6|[146_155]
SSDNATLTHY	|Q5VWN6|[1661_1670]
APRPFPEVSL	|Q96KV7|[287_296]
LVDPASHTLY	|O95754|[69_78]
IPTNTMHYGS	|Q86X55|[599_608]
TPRPVIVEPL	|P23246|[441_450]
APIQGNREEL	|Q13435|[41_50]
QPRPQSTSLL	|Q96EP0|[276_285]
APKEQNLITL	|Q3B7T1|[281_290]
APHPVYYPAL	|O00329|[479_488]
VLLFPPLSSR	|Q9Y3T6|[78_87]
KVCNPIITKL	|P11142|[601_610]
AIQNPTMINK	|Q02086|[113_122]
LPRSINTDTL	|Q8NHV4|[374_383]
KVFDGIPPPY	|Q6NVV1|[17_26];|P40429|[103_112]
QVDPLSALKY	|Q9UL63|[649_658]
VLDISSNSHY	|Q9NYK1|[570_579]
TTDSSYGQNY	|Q92804|[41_50]
ATAYLPMLEK	|O14503|[332_341]
LTDITKGVQY	|P13639|[662_671]
VPRTLENPVL	|Q9Y5S1|[730_739]
AIYATIPVYK	|Q9P2I0|[83_92]
IPRENAQISL	|Q9Y275|[263_272]
QPDQTRIVAL	|P22087|[239_248]
SVLEPPLFLK	|Q5GLZ8|[549_558]
ILFDGIPLEK	|P22033|[172_181]
ATEQAPLWAY	|Q9Y6K0|[110_119]
NLDQATRVAY	|Q9NTJ3|[720_729]
SPYPTKTQTM	|P04843|[164_173]
QPRDPPTETL	|Q9UIM3|[38_47]
VTYVPVTTFK	|P62899|[106_115]
APNPYRQAIM	|Q7RTS9|[300_309]
VTEDGNQHVY	|Q8WU10|[98_107]
LLDTAQRALY	|Q6AW86|[17_26];|O75467|[17_26]
NPPQQQRLAL	|Q9BSI4|[218_227]
YVDEEGNLVK	|Q3KQV9|[363_372]
VLDQGKITEY	|Q9NRK6|[703_712]
ATDMPVKNQY	|Q96CN4|[131_140]
STYISILNQK	|Q8TDJ6|[1766_1775]
NTDHLTTVLY	|Q96K31|[125_134];|Q96EF9|[93_102]
LLDTPVKTQY	|Q6N021|[1119_1128]
QLDSAQKNLY	|Q5JUW0|[24_33];|Q2M3X9|[24_33]
LLDSSQKNLY	|Q96BR6|[106_115]
VVQLQDPREP	|P31785|[129_138]
QPRPVSQQEL	|Q96K80|[322_331]
IPRDPSQQEL	|P49327|[1169_1178]
YIYDGELVSK	|Q9Y2D2|[224_233]
IMDSGELDFY	|Q9UKD1|[156_165]
LLDPAQRTLY	|Q96NG5|[59_68];|Q8N988|[52_61]
LLDPSQKNLY	|C9JN71|[20_29];|P17024|[23_32];|P51523|[24_33];|P52737|[20_29];|Q7L945|[20_29];|Q08AG5|[20_29];|Q15973|[29_38];|Q9BS34|[20_29]
LLDQGQLNKY	|Q00610|[421_430]
AVLYQPLFDK	|P55209|[107_116]
YSDAFLNDSY	|Q8WVM7|[322_331];|Q8N3U4|[319_328]
LPRENQVVEL	|Q92917|[450_459]
TSDDVKEQIY	|P62277|[29_38]
KTDDLTMVLY	|Q96RL7|[1399_1408]
VTDDSPKYNY	|P49588|[480_489]
ITDPDPDIRY	|P42345|[664_673]
QPHQVEQTEL	|Q14444|[552_561]
DTEKELQALY	|O43432|[1503_1512]
MLYQTINSLK	|Q15782|[80_89]
MPSEQIRNQL	|Q14152|[514_523]
LLDDAQRLLY	|Q96HQ0|[43_52];|Q6PK81|[31_40];|Q8TAW3|[65_74]
QLDLAQRTLY	|Q7Z398|[28_37];|O43296|[30_39];|Q5CZA5|[29_38];|Q6NX49|[30_39]
LSEINKPNFY	|Q5QJE6|[252_261]
QPREPQVYTL	|P01860|[272_281];|P01857|[225_234];|P01861|[222_231];|P01859|[221_230]
NTDHQTQLLY	|Q06609|[196_205]
LTEDKETLQY	|Q9BSJ2|[88_97]
FVDPYPVNKY	|Q96M94|[408_417]
LTDIFQHDTY	|Q96BQ5|[209_218]
QTDADFYQQY	|Q13105|[748_757]
VTEEPQRLFY	|Q96LC9|[88_97]
SPAGPGRAASL	|Q9NWT8|[41_51]
APRAPPGPAGL	|Q9NRL3|[219_229]
SVASAAAVLSH	|P04844|[254_264]
TPRGGVGSVAL	|Q9P2G9|[448_458]
QSLAGGIIGVK	|P61978|[153_163]
APRALPGSAVL	|Q8IUW5|[2_12]
SPRTAVAPSAV	|Q9UQ35|[2272_2282]
SPAAKSPSAQL	|Q14203|[1175_1185]
APAGTTSSRVL	|Q96JP5|[40_50]
APAPAPARSLL	|Q6QNY0|[99_109]
APSSARASPLL	|Q8N1I0|[1693_1703]
VPRGSGNTVAI	|Q9NWZ5|[279_289]
SPRIATTTASA	|Q14980|[2087_2097]
LPSSSSSRGSL	|P25054|[831_841]
VVAPPGVVVSR	|Q13144|[5_15]
VLAPEGSVANK	|Q13283|[113_123]
TPRPGSAESAL	|Q9ULC8|[332_342]
TPKPSVGSISL	|O75376|[1078_1088]
VPKTTGEGTSL	|Q14566|[376_386]
GLDKAGSTALY	|Q92882|[101_111]
SPTLPAARSSL	|Q7Z2W4|[378_388]
LPSGDRVAVSV	|Q9BRZ2|[597_607]
TPRSTVGVAVL	|Q96PQ7|[596_606]
QVLSAATIVAK	|Q9Y4G6|[1492_1502];|Q9Y490|[1490_1500]
AVFPVAPTSSK	|Q14157|[929_939]
VPKSPDASSAF	|Q53GS7|[85_95]
AAAEPKLFGGF	|P12931|[57_67]
APSPSSSRSSF	|Q6PCB5|[94_104]
SPVDPGARQAL	|Q8TEU7|[3_13]
GPRSAQVAQSL	|Q9NU22|[3358_3368]
APRGNVTSLSL	|Q9NR96|[60_70]
LPAGVGTRSFL	|P18627|[284_294]
APMGREGVTAM	|Q5T9A4|[382_392];|Q5T2N8|[207_217];|Q9NVI7|[430_440]
TPDAMKAAMAL	|P02792|[93_103]
SPANPAHILSL	|Q9H967|[369_379]
VPAVTRAYTAA	|Q96Q80|[13_23]
RPIAPAPPSTL	|Q9H0E3|[152_162]
AIAPPTSLVEK	|Q96I25|[174_184]
SPNQARAQAAL	|P26599|[141_151]
APAPARPYQGV	|Q16633|[12_22]
MASIPLPDKAS	|P00491|[279_289]
KPIAVGSMSML	|Q9UBT6|[126_136]
VPKSLSSDSTL	|Q9HAW4|[715_725]
QPSPARAPAEL	|Q13794|[11_21]
APALARTLQSL	|Q96HA7|[1203_1213]
VVSEVDIAKAD	|P20591|[2_12]
GVIGQDGLLFK	|Q9NQT5|[191_201]
NPRQPLPASGL	|Q96L08|[231_241]
VTDGAILGKLY	|Q8NEZ4|[1500_1510]
SPRPNPTSSPL	|P41229|[1222_1232]
LPNQARAQAAL	|O95758|[141_151]
YPNFAGPHAAL	|Q9BY44|[203_213]
VPRASVPDGFL	|P14174|[10_20]
TPSLVKSTSQL	|Q06055|[10_20]
SVYSPSGPVNR	|Q9NS56|[191_201]
ALLDGSNVVFK	|O15212|[48_58]
APREALAQTVL	|Q99829|[492_502]
VPDSSGPERIL	|P61978|[78_88]
APRNSAELTVI	|O60566|[784_794]
MPRNGTGVLIL	|Q9NVP1|[247_257]
IPSSSHVSNNM	|Q99590|[1304_1314]
FPRSPGQPSSL	|Q5T011|[1648_1658]
SPLDSAARDEL	|Q8NBJ5|[612_622]
APRPPQDLIGL	|Q92797|[1131_1141]
VPMEIKPGISL	|Q9NV88|[527_537]
VPRSQGTEAEL	|Q8NAG6|[261_271]
SPSTNRGPIQM	|Q6VMQ6|[899_909]
SVYYNEATGGK	|P07437|[48_58]
SIFAGQNDPLK	|P27816|[163_173]
APSGLRSQVQF	|Q96HH9|[391_401]
AQYSPQQLAGK	|Q01581|[358_368]
STYPAQNGQVK	|P08575|[1225_1235]
FLDASGAKLDY	|Q7L1Q6|[53_63]
APRQPGLMAQM	|Q9Y6H1|[49_59];|Q5T1J5|[49_59]
APLSEDQRTAL	|O15397|[981_991]
LPQPNRTSSVL	|Q12888|[111_121]
LPRSIGNLTQL	|Q6UWE0|[119_129]
APTQEKIFAVL	|P51825|[1040_1050]
SPMSDVVSREL	|Q15051|[472_482]
APNNYRSPIST	|Q15762|[296_306]
LTEVNKAGTQY	|P50453|[74_84]
IPRVVQEGDVL	|Q13608|[347_357]
VTESPAKFALY	|Q86WH2|[134_144]
LPSNERAVQTL	|Q9NR48|[1650_1660]
ALMPQETQALK	|Q8WYJ6|[174_184]
SLFSPAFYTAK	|Q13077|[290_300]
SSEVIKDANLY	|Q15717|[99_109]
TEAGLKELSEY	|Q7L1Q6|[234_244]
IPYHSEVPVSL	|Q01082|[2247_2257]
DTSRPLGDSMY	|Q14596|[741_751]
IPYNPSSHESL	|P41743|[217_227]
LPRTIFPTSTI	|Q99590|[265_275]
VLQAADILLYK	|Q9UGM6|[162_172]
SVIDPSRITPY	|Q9H257|[23_33]
APSDLRTIQTF	|Q9BUL5|[80_90]
TDYGGLIFNSY	|P00403|[111_121]
ELDPSNTKALY	|Q08752|[301_311]
GVYETVNQNTK	|Q9BTE3|[83_93]
MPDVGRSMQQL	|Q5GLZ8|[838_848]
SAVNPEHLSYF	|Q9HAU4|[473_483]
LPRTTTESEVM	|P11586|[72_82]
YPSVENVRTSL	|Q9NUW8|[441_451]
LSEVNRTGTQY	|P50452|[74_84]
QPIDNVSRNLL	|Q8N201|[341_351]
LTDIHGNVLQY	|O95861|[262_272]
STDVSDLLHQY	|P28062|[261_271]
AKQDVVLNYPM	|Q15029|[962_972]
VLDINSIDNLY	|Q53G44|[322_332]
ILYAPYNPVTK	|Q86UK0|[809_819]
QLDVAGRVMQY	|Q6VY07|[703_713]
ISEQTGKELLY	|P53396|[6_16]
QPEAQRALQQL	|Q6IBS0|[183_193]
YTADGKEVLEY	|Q9Y296|[75_85]
KTEDPDLPAFY	|Q6P2Q9|[341_351]
ALEEPDDQNRI	|P31994|[300_310]
YQDPDATSLKY	|Q86WJ1|[709_719]
ELDPMAMTQKY	|Q13435|[834_844]
TSETPDYLLKY	|P55199|[503_513]
VTEITDDLHFY	|Q7KZF4|[687_697]
FSQPENQNLLY	|Q9BXW9|[1078_1088]
ETDLLDIRSEY	|P50995|[463_473]
ALPSLPAGSGLK	|Q9UEE9|[208_219]
VVLPGGTATSPK	|Q8N1G0|[424_435]
TPRGGVGIATVM	|Q9P2G9|[542_553]
APRPAPVAQPPA	|Q9Y6H1|[25_36];|Q5T1J5|[25_36]
SPRPSGPGPSSF	|Q96T58|[3025_3036]
APRPGAPETTAL	|Q7Z3C6|[766_777]
APRPPATVTNAV	|Q9BXS5|[146_157]
SPKPLVTPGSTL	|Q9GZN2|[153_164]
ATISNDGATILK	|Q99832|[56_67]
APQALSIKTSSL	|Q14289|[327_338]
SIFASPESVTGK	|O75940|[197_208]
APNAGSRMTQTV	|P51659|[193_204]
ALIDPSSGLPNR	|Q92530|[220_231]
IIQSPSSTGLLK	|Q9P2D0|[1001_1012]
TPRLASTNSSVL	|Q13428|[102_113]
QPRSISVEGSSL	|O75665|[58_69]
SPRPNPTSSPLL	|P41229|[1222_1233]
PSKGPLQSVQVF	|P62249|[2_13]
QSESETAGSTKY	|Q93008|[1852_1863]
TLDSALNAASYY	|Q6NUS6|[267_278]
YTVTSGDPPLLK	|Q96T49|[537_548]
KTETPSVSSSLY	|Q8TCU4|[1700_1711]
TPMPRNIEGATL	|Q14872|[112_123]
ISTPEELGLDKV	|P20674|[139_150]
STDVDKTGASYY	|Q9BY44|[240_251]
GTEIDGRSISLY	|P19338|[451_462]
SPRANLPPLYAL	|Q15646|[225_236]
VRPPVQVYGIEG	|P48047|[28_39]
VVDESGKVVDIY	|Q9UGJ0|[462_473]
SPRFVDVQPSSL	|Q8WYP5|[528_539]
KLDNTVQDAGLY	|Q13107|[197_208]
QVTQPTVGMNFK	|P08708|[118_129]
YTDDAGRPQTAY	|O43374|[641_652];|C9J798|[641_652]
GTEFPNPLISKY	|Q3T8J9|[843_854]
QVDESGTKVDEY	|P19447|[45_56]
LVDIVKGTNSYY	|P09874|[559_570]
ASEQQALHTVQY	|Q5SRE5|[1541_1552]
LSELSNPEISKY	|Q9Y485|[783_794]
FTEAGLKELSEY	|Q7L1Q6|[233_244]
YSEVLTDTRGLY	|Q8TB68|[166_177]
FSENLQPHISSY	|Q8TEX9|[421_432]
LLDENKSLSTYY	|O43318|[574_585]
SLYTYPQGTWQK	|Q15762|[109_120]
YTEFTPTEKDEY	|P61769|[87_98]
GARLPGAAL	|P42126|[18_26]
TPRGGVGSV	|Q9P2G9|[448_456]
PRAGGPLGL	|Q14160|[1008_1016]
RPAPVAVAA	|Q96KR1|[91_99]
GPRAPVGSI	|P51826|[718_726]
RPAGVGVVV	|P30793|[198_206]
RAPGGGLIL	|Q8N7J2|[218_226]
TPGPAGSRL	|P57086|[94_102]
GPRGMGTAL	|Q99623|[15_23]
SRSSGVPGL	|Q8N3D4|[826_834]
RPAPALAPA	|O94985|[4_12]
SPGPSRPGL	|Q92888|[10_18]
RPAGALVAL	|Q2T9J0|[270_278]
GPADRAAVL	|Q8IW40|[156_164]
APNLRGSGV	|Q8ND30|[736_744];|Q86W92|[825_833]
RPASAGAML	|Q14814|[198_206]
MARGAALAL	|P14209|[1_9]
MPRGSGTGI	|Q9H0D6|[822_830]
KPYGGSGPL	|O75362|[988_996]
GPHPGTSDL	|Q86XN7|[584_592]
HPSGATPTL	|Q8NFD5|[411_419]
RPNAAAPAL	|Q6ZUM4|[647_655]
GPRTPGGQL	|Q96PG8|[36_44]
GRADLAPAL	|Q8IUW3|[63_71]
LPRAEGAAV	|O15534|[992_1000]
SPALGLRGL	|P46940|[330_338]
GPRAGGEEL	|Q32MZ4|[688_696]
GPREAVSGL	|Q9GZU3|[224_232]
GPRSGLISV	|Q8NEZ4|[4074_4082]
SGGPGPRVY	|Q96C90|[21_29]
ARAAAAFVL	|O60518|[202_210]
HPSLSAPAL	|Q53ET0|[389_397]
GRFGMAAAL	|P49748|[340_348]
MPRGSGSGF	|Q9NWH9|[1015_1023]
RPSQAAPAV	|P40222|[33_41]
SGMGKTAVF	|Q13838|[91_99];|O00148|[90_98]
RPQSGANGL	|Q8WVX3|[31_39]
GVRPVSGDL	|Q9Y2U8|[90_98]
RPSGAVVTL	|Q9Y314|[240_248]
LPRGSGIVT	|Q05193|[57_65];|P50570|[57_65];|Q9UQ16|[57_65];|P20591|[95_103];|P20592|[143_151]
GPRSTASDL	|Q8IWE5|[247_255]
GRFGPLASV	|O15042|[295_303]
GARFPSGTL	|Q13443|[4_12]
GRTGVSVVM	|Q9UQ53|[138_146]
RPSGPGPEL	|P51531|[261_269]
RPGPLTSAL	|Q70EL2|[247_255]
GRLPVGLSL	|P52333|[148_156]
GRAGFTAAY	|P11717|[1534_1542]
LPSGDRVAV	|Q9BRZ2|[597_605]
LPRGGLTSI	|A2RUS2|[1029_1037]
APRGNVTSL	|Q9NR96|[60_68]
APRAALVFA	|Q6P9G4|[3_11]
YAAGVHSVL	|O43299|[596_604]
QPFGGGSHM	|Q00653|[348_356]
RPSGGMEAL	|Q96KM6|[394_402]
SPLRSSSAL	|P59923|[171_179]
ARISTSPSV	|Q6W2J9|[362_370]
GPALGRSFL	|P32970|[78_86]
LPRALGSGF	|Q96CX6|[59_67]
SPDSRASSL	|Q9UHB6|[362_370]
YPRPGGSSV	|Q9UN70|[569_577]
RPANPPGVL	|P35580|[524_532]
GRTAGIFSL	|Q14159|[561_569]
SPRVGGFGF	|Q96DF8|[292_300]
RPVPSSPAL	|Q8N612|[164_172]
SRNAGAFGF	|O60610|[991_999]
RPSVNGLAL	|Q9H2K2|[1128_1136]
HPMGGLNAM	|Q92879|[251_259]
SPEPGREGV	|Q9NWK9|[25_33]
GRYGAISGF	|Q9BT67|[145_153]
GRSPLTLAL	|Q504T8|[135_143]
APGQRVGML	|P36956|[1104_1112]
YPRPGTPAA	|Q5VV42|[395_403]
SPRLPVGGF	|Q14669|[1921_1929]
GRTGTIIVI	|P29350|[458_466]
NRPGTVSSL	|P35659|[115_123]
APRPAGSYL	|P33076|[5_13]
KPSPIYGGL	|P03923|[22_30]
GVRPFGVSL	|P25787|[126_134]
GRIGVFPSV	|O94868|[614_622]
AIRNAMGSL	|P55036|[351_359]
KPAGGYQTI	|O43164|[23_31]
QPIHPSGSL	|Q9P2D1|[365_373]
GRAALITSF	|Q9H7F0|[928_936]
GRLGSTVFV	|P52272|[200_208]
RPPPIGAEV	|Q07820|[78_86]
RPAPPAQSL	|O95208|[528_536]
GRGSFMLGL	|Q92905|[281_289]
RQPLPASGL	|Q96L08|[233_241]
TPHASNLSL	|Q96RT7|[1574_1582]
RPAVIGDVL	|Q9BQ39|[374_382]
YPHLVAGAL	|Q9UHL4|[175_183]
SPGQRAVLL	|Q12772|[1098_1106]
ARTTLLPGL	|Q9NSD9|[450_458]
SPRVPNSSV	|Q9NR09|[4258_4266]
RPSVGVQSL	|Q96LY2|[26_34];|Q96AQ1|[26_34]
SPRVPASET	|Q9HD15|[60_68]
GRQGQAITL	|Q9Y6V7|[343_351]
MPRQLSAAA	|Q9UQV4|[1_9]
SAYGSVKAY	|P07355|[22_30];|A6NMY6|[22_30]
VPSSRDTAL	|Q8IWZ3|[1288_1296];|O75179|[1316_1324]
LPNGDRAGF	|A3KN83|[309_317]
GTWSTGLPK	|O60828|[215_223]
GRSAAVWSL	|P11309|[311_319]
ARAGALFQL	|Q6ZTW0|[196_204]
GPAPVGRFF	|Q8TDP1|[40_48]
NPKESSSSL	|Q12789|[588_596]
HPAAFPLPV	|Q9H6Y7|[2_10]
RVAGISLAY	|Q9NX46|[156_164]
SRAGIATQF	|Q9UQR1|[740_748]
TSDKPGSPY	|O60488|[51_59]
KVSAVTLAY	|P15391|[291_299]
RPAWAPAAL	|P48735|[18_26]
GRYGGFLLA	|P18858|[773_781]
LPRGVLEGL	|Q86UD0|[64_72]
RPQDGVAVL	|O00159|[689_697]
GRSPAQILL	|P14550|[242_250]
SPRGAGYTF	|P62714|[212_220];|P67775|[212_220]
RPLPAALAF	|Q5T447|[34_42]
GRFGSGMNM	|P52272|[361_369]
IRSGISPNL	|Q6UVJ0|[505_513]
GRVNVVEAL	|Q8IVB5|[96_104]
EPRTVVSGL	|P54577|[398_406]
VPRSIAANM	|P24928|[380_388]
QRLPVGAAF	|Q96EH3|[40_48]
TPFGGRLLV	|Q4VC44|[119_127]
HGIDPTGTY	|P07437|[28_36];|P68371|[28_36];|P04350|[28_36]
SARAIMAQL	|P35221|[668_676];|P26232|[667_675]
GRSAVVEML	|Q13418|[45_53]
SPHGTFLGF	|O75888|[239_247]
SPAYRDLAA	|O15492|[174_182]
GPRSYTIAV	|P06280|[361_369]
SADPGNLKY	|Q6P435|[32_40]
SLYGPGTNR	|Q9UMY1|[197_205]
YPKGAGEML	|Q96DE5|[38_46]
RPSTSTAVF	|P12270|[1808_1816]
RPSPPVQSV	|Q5VV67|[857_865]
GRYDGLVGM	|P49590|[362_370];|P12081|[361_369]
SPRGAGYLF	|P60510|[209_217]
QPRNPATSV	|Q9C0C7|[1091_1099]
AAVSFISKF	|P62324|[17_25]
VRNGGQILI	|P55735|[42_50]
APRLQSEVA	|P53990|[107_115]
SPAHDNIAF	|Q12912|[140_148]
SPSDRPLSL	|Q12769|[280_288]
RPISDPSSL	|Q8N4L8|[62_70]
GRSDLIPTI	|Q14691|[54_62]
ARSGLELLL	|Q8WXF8|[62_70]
IPRGPASQF	|P49750|[617_625]
KSDGSFIGY	|P31751|[30_38]
RPLFPGSTV	|Q00537|[386_394];|Q07002|[336_344];|Q00536|[359_367]
RPAANFDAI	|P20073|[180_188]
SRAGLQFPV	|P0C0S8|[20_28];|P16104|[20_28];|Q8IUE6|[20_28];|Q9BTM1|[20_28];|Q93077|[20_28];|Q7L7L0|[20_28];|P04908|[20_28];|Q96QV6|[20_28];|P20671|[20_28];|Q99878|[20_28];|Q16777|[20_28];|Q96KK5|[20_28];|Q6FI13|[20_28]
VPRGQGSQF	|O75807|[126_134]
KPYSPLASL	|Q13469|[70_78]
RAYPAAITI	|O95071|[1124_1132]
TPRGTLLAF	|Q99519|[85_93]
RPAQVGDSF	|Q9NTJ4|[65_73]
ARNPPGFAF	|Q16629|[43_51];|P84103|[42_50]
GRSATVWSL	|Q86V86|[223_231]
ARFSGNLLV	|P61619|[310_318]
ARNALTALF	|Q9ULV3|[852_860]
ARPLEGTSF	|Q15942|[474_482]
ARDFATPSL	|Q63HN8|[2259_2267]
HPLSNPAEL	|Q13907|[88_96]
ARPALLLLL	|Q86UD1|[9_17]
MPSSRAYGL	|Q9Y6Q9|[411_419]
FPDSTKSSL	|Q17RS7|[867_875]
LPRNAQVAL	|Q8NEB9|[100_108]
IRAAPPPLF	|P10619|[2_10]
VPRNLPSSL	|Q9NR96|[214_222]
GRFFLSSGL	|Q9BTV4|[188_196]
GAYGQAVRY	|Q9UID3|[194_202]
RPQASALEL	|P36956|[1003_1011]
FRNPLAPAV	|Q12980|[377_385]
RPLQSSALL	|Q16254|[297_305]
RPSMSPTPL	|Q9UQ35|[2119_2127]
GPRALTEEL	|Q63HN8|[3238_3246]
SINAQRNAL	|Q14669|[574_582]
KTDGSFIGY	|Q9Y243|[30_38]
SPSFPRPSL	|Q92610|[1052_1060]
RPYGVGLLI	|P25786|[126_134]
HSDPSILGY	|O75420|[1012_1020]
SPRNLAMEA	|O15371|[308_316]
SPEMERAGL	|Q5UE93|[358_366]
AANPHSFVF	|Q9NQ55|[26_34]
SPADRMLTV	|Q9H6E5|[837_845]
TPSSSRLEL	|Q9C0C7|[626_634]
ARSELLTTV	|Q12789|[448_456]
LIRPVSASF	|P05496|[21_29]
YAKGFGGQY	|P14317|[190_198]
GQYGNPLNK	|O14672|[19_27]
SPRGAGWLF	|O00743|[208_216]
RPAPPPEQV	|Q9C0G0|[1855_1863]
APYGNPKNM	|Q92567|[12_20]
APGEFRAIM	|P55265|[469_477]
RPQSAISSF	|Q5VT06|[927_935]
ARFGSVNEL	|Q13129|[751_759]
YRAQPSASL	|Q96PK6|[249_257]
RCKDISSAL	|P13489|[44_52]
SPDATRESM	|Q15036|[421_429]
STDPRPASY	|O15169|[34_42]
ARAFPMPGF	|P34897|[493_501]
SPRDTASLF	|Q7Z2Z1|[441_449]
GPRTDTLSF	|Q86WH2|[172_180]
SPGYRLSTL	|O60244|[46_54]
SRNGSIPTY	|O75122|[640_648]
HPNGNITEL	|Q7KZF4|[279_287]
KPAFNLSAF	|P49790|[228_236]
ARTPVTSTY	|A6NEC2|[236_244]
VPRAILVDL	|P07437|[60_68];|Q9BVA1|[60_68];|Q13509|[60_68];|Q13885|[60_68]
QPREEPGAL	|Q8IV53|[763_771]
LSYNTASNK	|P49207|[11_19]
SPRSGYFAL	|Q9Y5J1|[530_538]
LPRELAEAV	|Q9UBT2|[7_15]
GRAGVFTQY	|Q6B0I6|[81_89]
LPNGLRESI	|Q96P70|[113_121]
SPGWVRLAL	|Q9BQB6|[7_15]
QPRGPALLF	|Q96RU8|[15_23]
TMEGGTLKY	|P16885|[591_599]
QPSFHGVDL	|Q86X55|[315_323]
ARTSYLAAF	|Q4ZIN3|[300_308]
RPTNANLTL	|Q9UPP1|[306_314]
QPRGPDNSM	|O75534|[775_783]
KMSSSVISY	|Q9H900|[355_363]
GRTDVVELL	|Q9ULH0|[115_123]
GRNTIQITV	|Q9ULJ6|[660_668];|Q8NF64|[519_527]
IPRDGAFLI	|P16885|[663_671]
TPAFPRSLL	|Q7LBC6|[602_610]
ARANQAIQM	|Q9Y4G6|[1470_1478];|Q9Y490|[1468_1476]
QRTDVLTGL	|Q6SPF0|[497_505]
GRYEVAVPL	|Q6P597|[221_229];|Q9NSK0|[225_233];|Q07866|[227_235];|Q9H0B6|[212_220]
SEDHIIGAY	|Q8TCB0|[56_64]
GRTFLLQGL	|P49411|[19_27]
VAYGKGTYF	|Q460N5|[1707_1715]
GPRLASEYL	|O43290|[383_391]
MPAFLRSAL	|Q969X6|[433_441]
LPRLTPPVL	|P50990|[333_341]
TPQGFRSTL	|Q8N9N2|[55_63]
MRTAALPTF	|Q3MIR4|[254_262];|Q9NV96|[261_269]
KPYDGITTI	|O75376|[1336_1344]
SSDVGHDEY	|Q01082|[769_777]
SSDANPVRY	|Q9NU22|[130_138]
GRLAEAQTY	|P09914|[109_117];|Q5T764|[109_117]
TPRATTESF	|O75376|[1300_1308]
FAQNKPTGF	|P52948|[109_117]
SRLGSVFPF	|Q13217|[9_17]
VPHQPFSQA	|Q9Y2L1|[439_447]
RPAQEALLL	|Q9UIL8|[21_29]
VAVGRALYY	|Q16531|[510_518]
RTGAFALLY	|Q9H3S7|[1398_1406]
ARLPWAGQL	|Q96AQ6|[624_632]
APRNLQLSL	|Q92673|[1653_1661]
SSDPYHSGY	|Q9BXP5|[88_96]
TPNDGRCHL	|P05107|[280_288]
GRYPGVSNY	|Q13564|[440_448]
SRANSLFAF	|P61009|[6_14]
RPQESGILL	|P41279|[102_110]
RPAANPIQF	|P23921|[742_750]
NPRAMQALL	|Q9UMX0|[456_464];|Q9NRR5|[462_470]
SPRNEVEAL	|Q5R372|[144_152]
VRPPVQVYG	|P48047|[28_36]
QPIKESNSL	|Q9UPU5|[1353_1361]
NPRALSFVL	|P00973|[128_136]
APINFTSRL	|Q9Y4B6|[1046_1054]
GRLLINSVF	|Q96CP6|[368_376]
GPHPPWTEV	|Q96PV7|[642_650]
LPRESAEAF	|Q8IV20|[345_353]
VRNNIAYGL	|Q03519|[560_568]
YRAQPSVSL	|Q96PK6|[237_245]
RTDGILALY	|Q9UBX3|[53_61]
GRWPGSSLY	|Q14739|[14_22]
SRTSVQPTF	|Q5T4S7|[3843_3851]
GTYQPLSTR	|O15213|[390_398]
GVSSIFIYH	|P33076|[249_257]
ARFGLIQSM	|P53990|[81_89]
RPSPWVPAL	|Q63HK3|[197_205]
AVLTKQLLH	|Q14094|[179_187]
SSDPQAQKY	|Q0VDF9|[75_83]
KLNDNVSAY	|Q9BPZ7|[222_230]
YRLGAPFTV	|P13765|[109_117]
FARVPVATY	|P49005|[24_32]
ITDKNSLAY	|Q9HCG8|[146_154]
YAKNIIVGF	|P05166|[336_344]
SPMADRSMM	|P18583|[1076_1084]
YRGQPGNAY	|Q96PK6|[540_548]
LRNIDNPAL	|O75083|[42_50]
RAASVFVLY	|Q9NRF9|[39_47]
LPRDQNNGL	|Q9ULH0|[1168_1176]
TADYHSNGY	|Q8TCU6|[345_353]
SRNAQTFGF	|Q9NSV4|[854_862]
QTDGLKGFY	|Q96CQ1|[169_177]
KTEVNSGFF	|Q92526|[241_249];|P40227|[241_249]
IPRQQNSSV	|O60244|[1401_1409]
SPRIPPSQF	|Q15596|[499_507]
SPEQSRNVL	|Q96JM3|[675_683]
QVQAERDAL	|Q96GX5|[77_85]
APNPYRQAI	|Q7RTS9|[300_308]
RPAQVSQPF	|Q9Y520|[2628_2636]
RPQAPLNSF	|Q6PJG2|[193_201]
KSTAISLFY	|P13639|[71_79]
LVRPVFGEL	|O00506|[361_369]
LPRQDTTSI	|P78382|[315_323]
APNNYRSPI	|Q15762|[296_304]
RPSQLGQVF	|Q93073|[150_158]
YPGAERNLL	|Q8NE65|[17_25]
ARLPLVNSY	|P42858|[2400_2408]
VRNPFTVTV	|Q49AG3|[574_582]
STELNHLGY	|Q8IXI1|[298_306]
FVNPHVSSF	|Q8IV63|[37_45]
SRVLQNVAF	|Q16548|[34_42]
RTAPLLLSY	|Q12769|[765_773]
SPTYRALLL	|P49795|[199_207]
QPRDFGDSL	|Q709C8|[3509_3517]
MLRENGDSL	|P20592|[653_661]
HPVQPWASL	|Q8NDX1|[386_394]
TPRPKFSVC	|P62906|[58_66]
YAFAHILTV	|O75204|[129_137]
SPQANRTYV	|Q9Y2I7|[329_337]
ARFPETPAF	|Q9P2P5|[666_674]
RPNNAYTAM	|Q9Y5A9|[43_51]
FARPGDVEF	|Q15642|[276_284]
SRNGVITQY	|P10586|[634_642]
RPSSTITYL	|Q5SWH9|[82_90]
TVSDAILRY	|Q9Y5W9|[146_154]
RSDLQSLGY	|Q8IV63|[370_378]
LRFQSSAVM	|Q16695|[83_91];|Q71DI3|[83_91];|P68431|[83_91]
ARFVNVLGY	|Q8TAP6|[340_348]
SPMAERSMM	|P18583|[1026_1034]
TRSQTSVNF	|Q9Y252|[197_205]
SPFFERSGL	|O60711|[188_196]
YPRLGGFVM	|Q92797|[1009_1017]
IPRQPSNDL	|Q6UXI9|[387_395]
QPRDIGLQI	|P20592|[237_245]
YSDPDSGHY	|Q8N5H7|[487_495]
KVDSNDSLY	|Q7Z3J2|[842_850]
RPINALDEL	|Q8TCU6|[1534_1542]
LTDRGVMSY	|Q14653|[252_260]
FGNNKLTTF	|P52948|[365_373]
FSDKELAAY	|P21439|[241_249]
VSDFGLSRY	|Q06187|[537_545];|P54762|[760_768]
GTDLSIFKY	|Q96JG6|[401_409]
IPREVSETL	|Q8N5H7|[225_233]
YTSPGTQKY	|Q6P1X5|[552_560]
VPRNYDPAL	|Q9NV06|[24_32]
IIRENSISL	|Q9H1A4|[1433_1441]
KPIEQLLGF	|Q96DE5|[97_105]
EPRQTTSNL	|O00487|[173_181]
APNERPYSL	|Q01151|[84_92]
FSDPNFLAH	|P16885|[1142_1150]
GIYAYGFEK	|P60842|[46_54];|Q14240|[47_55];|P38919|[52_60]
FPQATRQSL	|Q9ULV3|[151_159]
SRNALLFNL	|Q8WTW4|[77_85]
VPASFRLQM	|Q9BTE3|[414_422]
SPRLSQTFL	|Q92608|[1780_1788]
YADPVNAHY	|O95758|[226_234]
KIDEPSTPY	|P41236|[67_75];|Q96PQ5|[67_75]
RPYSNVSNL	|O95248|[1581_1589]
VPDTSRIYV	|Q9UBK9|[83_91]
ARVSIVNQY	|Q9GZR2|[263_271]
GRTNLIVNY	|Q15717|[18_26]
RIASTLLLY	|Q9UHD2|[427_435]
ASDRNIVLY	|Q9NV06|[216_224]
SSDVSHQEY	|O60381|[78_86]
ISRETGEPY	|Q04637|[303_311]
RSDVEILGY	|Q86Y07|[230_238]
YTRPGLPTF	|Q96ME7|[380_388]
QRVAGVYLF	|P48651|[285_293]
RAAPFSLEY	|Q15181|[9_17]
MPFRGYAVL	|P49327|[465_473]
FIRVVGSEF	|P43686|[227_235]
QPRPQDSNL	|Q9UPP1|[941_949]
LPAPKWTEL	|P52333|[744_752]
IPRNQLQSV	|Q5T4S7|[92_100]
TSDVDLDKY	|Q6PJ21|[170_178]
ARLTDYVAF	|Q99627|[198_206]
SIGDIFLKY	|Q9H8V3|[531_539]
QRLQQQAAL	|Q8WXI9|[477_485]
RTYGVVAQY	|A2RUS2|[74_82]
IARNLTQQL	|Q99541|[313_321]
FPDNQRPAL	|P43268|[432_440]
GRAFIFPSY	|Q8TBZ8|[315_323]
KTLDSALFY	|Q9UPU5|[2244_2252]
YSQADALKY	|Q92800|[729_737];|Q15910|[728_736]
APFLRNVEL	|A5YKK6|[2076_2084]
TADHNLLLY	|Q12788|[311_319]
NPAENFRVL	|P13010|[593_601]
GSDKINYTY	|O15226|[193_201]
YTFPNGAKY	|Q502X0|[30_38]
ILNSHCFAR	|P54368|[9_17]
YLRPPNTSL	|O75494|[4_12]
LTDDGNKWL	|Q13200|[391_399]
DIDIRPGLY	|O96019|[337_345];|O94805|[334_342]
SPRVQFQSL	|Q8N720|[12_20]
IPYGERITL	|P49750|[1461_1469]
SPVFRLETL	|Q9Y5S1|[7_15]
LPRSEVTFL	|Q96GK7|[91_99]
SSEAHLQQY	|P48552|[271_279]
APRDAYWIA	|O75794|[109_117]
RPQEVSAYL	|Q6NXE6|[106_114]
CRNKTQISL	|P30876|[1140_1148]
VPMFRNVSL	|O14980|[257_265]
NSDINSNHY	|Q9UPW5|[737_745]
RPMEFEAAL	|Q9H9L7|[9_17]
GRTFIQPNM	|Q06203|[354_362]
MRMATPLLM	|P04233|[107_115]
IRMPSLPSY	|P29401|[301_309]
RLDAVTLLY	|Q6ICL7|[214_222]
MPKMDQDSL	|P37268|[28_36]
SPREMVAQF	|Q86YC3|[295_303]
KPMLNNNSF	|Q14679|[214_222]
SRTPVLMNF	|Q9H3K2|[146_154]
SRAPVFLQF	|Q4ZIN3|[120_128]
YSDKYGLGY	|P53350|[417_425]
GRPCEFPFL	|O60449|[166_174]
RAFPLPMSF	|Q9UHJ6|[446_454]
RPVPWNALL	|Q05923|[47_55]
GRTFPVDQF	|Q6P158|[722_730]
DTDSQRLAY	|Q01094|[237_245]
NPRATFSEF	|O14776|[742_750]
AARDFLQTF	|Q9BT17|[301_309]
ARYLVNEGF	|P54198|[943_951]
RADGNFLLY	|Q6ICG6|[368_376]
KLADQIFAY	|Q96F07|[729_737];|Q7L576|[705_713]
RPSQNLLQL	|Q71SY5|[577_585]
TPRDTTMTF	|P98194|[804_812]
NTDHQTQLL	|Q06609|[196_204]
YAALHGEFY	|Q9BT23|[79_87]
RPSPMQLEL	|O00764|[283_291]
SRGDFVVEY	|Q9NQR1|[278_286]
FLDSKGLEY	|Q9H1J1|[136_144]
KPLEDQTQL	|P13284|[213_221]
IPANWKTEL	|Q4LE39|[261_269]
VSDSKQFTY	|Q00653|[317_325]
FTDKSAEDY	|Q13153|[145_153]
LSDNTPEHY	|Q9ULE6|[85_93]
RPYSQVNVL	|P46939|[165_173]
YSSSRSDLY	|P38159|[327_335];|Q96E39|[327_335]
SPQDSRLYL	|Q9HA65|[177_185]
PTDTNVIRY	|Q92623|[195_203]
ARNDYLLTL	|O94868|[207_215]
NPRQAAYEM	|Q9H0D6|[456_464]
LVDGYNVHY	|Q9H078|[609_617]
SRVLIFSQM	|P28370|[503_511];|O60264|[500_508]
RPQPQTLQL	|O00399|[156_164]
YPDEVRGVF	|P15289|[379_387]
KSDTQNLLY	|O43909|[281_289]
GRYDFTPLI	|Q9P2E3|[553_561]
KTDPENTDY	|Q9BW85|[90_98]
LSDAEFHTY	|Q3MII6|[199_207]
NTEEEGLKY	|Q9NYF8|[430_438]
RVASVMQEY	|P25787|[113_121]
QRVNVQPEL	|P53611|[321_329]
ITDTTRDVY	|Q8NC56|[23_31]
FIDASRLVY	|P35221|[611_619];|P26232|[609_617]
DSDLRNDSY	|P55197|[379_387]
HPYLAQNEL	|P14550|[188_196]
KLYQSIIGY	|Q9NSV4|[976_984]
FGREVDAEY	|Q8N6H7|[437_445]
FTDAGFEHY	|Q9UNH5|[237_245]
HSEEVPLLY	|O96024|[218_226]
RPMQQVDTL	|Q6PIJ6|[1004_1012]
SPLRPQNYL	|P06748|[10_18]
SPTQEREEL	|Q14738|[109_117]
RPAQFLPEM	|Q15345|[686_694]
RPYEPINSI	|Q8WUA4|[645_653]
TPNEERNVM	|P35606|[828_836]
AYKDAIYVF	|Q8N653|[75_83]
QRILSQPTF	|Q9XRX5|[37_45]
SAYLHPQQF	|Q12899|[343_351]
YVTTSTRTY	|P08670|[30_38]
RPFEDQTSL	|Q9H7B2|[70_78]
LVDQRVAEY	|Q9P215|[261_269]
FPRNYVTPV	|P62993|[205_213]
KPYQTMLVL	|Q92966|[199_207]
ATDFKFAMY	|P30279|[189_197]
AIDEDVLRY	|Q13356|[265_273]
GRQFLTQLM	|Q15459|[178_186]
IPYKPNYSL	|P22059|[409_417]
ETELDGLRY	|P46952|[110_118]
QLDKNSEVY	|Q52LJ0|[139_147]
QPRNPLEEL	|Q12815|[87_95]
YRPAYLVTL	|Q9UBI1|[145_153]
HSDPESDFY	|O94864|[131_139]
IIDGFMTHY	|Q9BZW5|[87_95]
VTDSIRDEY	|O00429|[258_266]
ALAEYVIYR	|Q9H2K2|[1135_1143]
MTERQALSY	|Q9Y2K2|[981_989]
QLYDKGLVY	|P41252|[165_173]
LSDFGLERY	|Q8IX90|[158_166]
SRYQGVNLY	|Q13310|[289_297]
YPFFRGVTI	|O75794|[15_23]
GRSEVIYNY	|Q7Z5Y7|[337_345]
SRQSYPNSY	|Q96K37|[395_403]
VYPERSTSY	|Q13242|[182_190]
SPQQNRQML	|Q9UPN3|[3564_3572]
IRFFGTTNF	|Q8N3C7|[501_509]
RSEDTAVYY	|P01743|[106_114]
YAFNGTQRF	|P04440|[45_53]
YAIDNPLHY	|A5YKK6|[93_101]
GRIASYYYL	|Q8N3C0|[1816_1824]
MPSQFRDIL	|Q09472|[2175_2183]
RVDQSLLLY	|Q67FW5|[221_229]
HLSSLQLFY	|Q9BWG6|[68_76]
ERNPAVYNF	|B0I1T2|[222_230]
LSDKNIEQY	|Q96QD9|[125_133]
RLDINTNTY	|Q9H173|[118_126]
ALNKQIMEY	|Q8N0V3|[243_251]
YRTDMIQAL	|Q6P2Q9|[1470_1478]
QRQDIAFAY	|P07355|[67_75]
FPMGDRLYI	|P49720|[43_51]
ETERIVTTY	|P50570|[455_463]
KLLDAYLLY	|P61803|[25_33]
MSEDKPQDY	|P35222|[662_670]
QVAERALYY	|Q16537|[358_366];|Q13362|[341_349];|Q14738|[417_425]
SVDPNQYYK	|Q15046|[70_78]
SRFSLENNF	|P42224|[69_77]
TRYQGVNLY	|P11940|[289_297]
FSKDIVENY	|Q13263|[125_133]
GTVYEDLRY	|O00762|[71_79]
IAYSRPVYF	|Q96RV3|[1067_1075];|Q9H6A9|[854_862]
MRYVASYLL	|P05387|[1_9]
SRNAYMLVY	|Q86UV5|[410_418]
FTETSKLQY	|Q00532|[317_325]
IRPENVIIY	|Q5VST6|[159_167]
AYSSYVHQY	|Q92624|[337_345]
VRTPYTMSY	|Q9BWF3|[197_205]
QPREPQVYT	|P01860|[272_280];|P01857|[225_233];|P01861|[222_230];|P01859|[221_229]
VYKAFVDNY	|Q12979|[183_191]
QTLSPQMWK	|Q8WU79|[421_429]
RPWTVMESL	|O43237|[141_149]
TPEPERDYL	|O43143|[324_332]
MIDVTKSYY	|Q9BTE1|[165_173]
FPESERPEM	|Q9UHX1|[425_433]
SRWQQGNVF	|P01857|[298_306];|P01859|[294_302]
YVEGVHQQY	|Q96GC9|[94_102]
ARIQPMPYF	|Q6NW34|[209_217]
RTEEALQLY	|O76094|[241_249]
YARQLEMIV	|P48556|[342_350]
FTAERSSYY	|Q7KZF4|[632_640]
FSYQHAIEE	|O15372|[138_146]
LTDDDLLRY	|Q04446|[569_577]
FPRNNISYL	|Q8N5M9|[92_100]
NPRYFPMSL	|Q6GYQ0|[1445_1453]
LRNQSVFNF	|P37268|[280_288]
SRDDNMFQI	|P53999|[58_66]
RLYQAQALY	|Q86WT1|[82_90];|Q8N4P2|[82_90]
DSDYHQEAY	|Q9UH92|[114_122]
RLSDTLLFY	|Q6ZPD9|[411_419]
MLDHQPPQY	|Q92925|[303_311]
IPRSEWDIL	|P17707|[35_43]
FVETESVRY	|P48444|[48_56]
FSEPRAIFY	|Q16512|[712_720]
QSDKVYEVY	|Q7Z388|[287_295]
NRGQFFTVY	|Q9Y2G9|[1086_1094]
VRNIVQQQF	|Q86UV5|[205_213]
YPRQQLLTL	|Q15645|[345_353]
FLKDNMAYM	|Q8IZT6|[396_404]
GRNDMTYNY	|O14497|[1500_1508]
RQFPTPFQL	|Q86YH2|[350_358];|P59817|[341_349];|Q6N043|[365_373]
RVDENNPEY	|P35611|[27_35]
FAEHNDLQY	|P41091|[322_330];|Q2VIR3|[322_330]
NLDSQRLQY	|Q8IX04|[320_328]
KLMENILLY	|O43187|[604_612]
KVSDWQVLY	|O43196|[329_337]
IRLPSQYNF	|Q8TEM1|[1231_1239]
TSDQQRQLY	|Q16625|[424_432]
LMERNNLSY	|Q01581|[76_84]
YLRDALPEY	|P49406|[189_197]
FLIDRSPEY	|Q7L273|[136_144]
MTEKQLNLY	|Q9NX18|[97_105]
TTEERTQLY	|Q8NBP0|[710_718]
VLDEAFQRY	|P06865|[60_68]
YLDDPDLKY	|P26358|[359_367]
NIDNFLSRY	|Q13464|[51_59]
LIDNSFNRY	|Q8IY81|[684_692]
NPREWTPEI	|Q6IA86|[374_382]
RTMPIYPTY	|Q9P2E3|[334_342]
RQFPTAFEF	|Q13614|[492_500]
ARDETEFYL	|P18077|[35_43]
FSEIDLEKY	|Q86XF0|[149_157]
DLDSRVLYY	|P26358|[916_924]
TLYFNTQEK	|Q92521|[40_48]
ESDSRQIFY	|Q8TAD4|[413_421]
ASEYDQIRY	|Q86Z02|[395_403];|Q9H2X6|[404_412]
MADKNIQYY	|Q5VWJ9|[408_416]
DTDEYVLKY	|Q5JVL4|[507_515]
FSERSNPFY	|O75586|[33_41]
YRQPPVPQY	|Q86TG7|[679_687]
IIFDRPLLY	|Q9UPQ8|[352_360]
YGYDNVKEY	|Q96GN5|[434_442]
YLDIPNPRY	|O14578|[1865_1873]
MIEPRTLQY	|P62249|[41_49]
QLDHLSLYY	|Q2Y0W8|[627_635]
HSDQQVFEY	|Q969X6|[545_553]
QTESQQIRY	|Q9H7F0|[131_139]
NRPEFITEF	|Q8WXH0|[5666_5674]
IPRETTYQF	|Q9BSJ5|[357_365]
LADIYRELY	|Q9Y6J9|[437_445]
ETERIYSLF	|Q15283|[758_766];|Q14644|[729_737]
YLDESKQLY	|Q8TBF2|[92_100]
IRTTQIYTY	|Q9UGP8|[225_233]
KMDLDNNFY	|Q8NAP3|[661_669]
YYKPDSPEY	|Q86U86|[126_134]
QSDYFRALY	|Q9P2K6|[26_34]
TRLEFQQQL	|Q9BUW7|[66_74]
FLDDFESKY	|Q8TF74|[392_400]
LSERADWQY	|Q5VST6|[50_58];|Q6PCB6|[91_99]
LTDRELEEY	|P35611|[567_575]
LRNTIMEQY	|Q9BYX4|[704_712]
LLEKEILFY	|O60264|[784_792]
HSELLEDYY	|P28288|[350_358]
FSDYLHPQY	|Q9ULG6|[566_574]
LLYESPERY	|Q03518|[744_752]
ARIFQFQNF	|Q2NL82|[525_533]
LLDTNRYLY	|Q9NWU2|[93_101]
YLDHNSFDY	|Q9BXR5|[286_294]
YSDRETQLY	|Q99759|[258_266]
ERLQYVFGY	|Q96MG7|[132_140]
TRYQTFVNF	|Q9C035|[334_342]
KVYENYPTY	|P35659|[349_357]
YVYFTNELK	|P50591|[35_43]
IQNDRQLQY	|Q9UBB9|[336_344]
YIDSKFEDY	|Q16181|[133_141]
WAYPRQVFI	|Q9P2D0|[432_440]
CLYPRFVQR	|O43776|[537_545]
FSEEQLNRY	|Q15544|[113_121]
LTDFIREEY	|A2RTX5|[435_443]
KTEYALWNY	|Q4ADV7|[907_915]
YQADIERMY	|O95573|[709_717]
ETDNMFNRY	|O00462|[118_126]
LTDFDIRFY	|P19784|[129_137]
YARDETEFY	|P18077|[34_42]
YTMKEVLFY	|Q00987|[48_56]
YSTDENFRY	|Q9BYX4|[5_13]
LSEWQKELY	|Q9ULD5|[302_310]
FPMEIRQYL	|P42224|[26_34]
YTDENQHQY	|Q5HYA8|[401_409]
WTDNRELTY	|O60449|[1025_1033]
NRFNYPFEL	|Q9H649|[57_65]
VVYQYWNTK	|Q8N766|[791_799]
LTDYDIRFY	|P68400|[128_136];|Q8NEV1|[128_136]
RLYFSQQTY	|P33897|[172_180]
YLEQLHQLY	|P40763|[14_22]
YIDENQDRY	|Q96KP4|[10_18]
ITDEQRQYY	|Q96D71|[281_289]
YLDYDDTRY	|Q9BVI4|[174_182]
ESEEYQERY	|Q9Y676|[60_68]
YIDEQFERY	|Q15019|[121_129]
FRYPQDYQF	|P43307|[124_132]
TPRGGVGIAT	|Q9P2G9|[542_551]
GRVGATAAVY	|P0C0S5|[45_54];|Q71UI9|[45_54]
SPRGSPDGSL	|Q8IZL8|[477_486]
VVSSSLGPAR	|Q9BQN1|[376_385]
RPNGVSAVAL	|Q9NZ63|[43_52]
TPSGSREGSL	|Q6P3S6|[419_428]
GRYGAICGFG	|Q9NV92|[260_269]
APRAASTESL	|O43292|[135_144]
SRLPSLGAGF	|Q8IZL8|[241_250]
HPFPGPGLAI	|P49915|[436_445]
RPPPSPSGTL	|Q14156|[787_796]
RPQAPATVGL	|Q15370|[68_77]
SPHSGVQTSL	|Q6PGQ7|[215_224]
SPDTAIRSGL	|Q29RF7|[651_660]
SPRSSSLVSV	|O94964|[1167_1176]
IPRGVNVSAL	|P38606|[118_127]
SPDGLGRLNV	|O95365|[549_558]
SPRSVGPFAL	|Q96Q05|[1051_1060]
QPSADRASSL	|Q53GL0|[231_240]
SPDGNRFATA	|O75083|[198_207]
VPRGSTTATF	|P11413|[328_337]
HPYGLGPPSL	|O15417|[818_827]
EPRDGPPSAL	|Q86YV0|[217_226]
TLLGKPLLGK	|Q7Z2W9|[142_151]
LLAEKVLAGK	|Q5JWF2|[939_948];|P63092|[296_305]
APRGTWSTGL	|O60828|[212_221]
RPYPSPGAVL	|O60828|[243_252]
RPAEVGGMQL	|P33316|[105_114]
ARVTGVPLSY	|P28340|[536_545]
GPRNAQIQAL	|Q96GC6|[122_131]
YSDHPSGGSY	|P38159|[272_281];|Q96E39|[272_281]
GLLEKIATPK	|Q9Y2Q3|[154_163]
ALVSTPVRTK	|O75376|[2087_2096]
TPFGGRLLVL	|Q4VC44|[119_128]
IVRGQTAESL	|P04839|[227_236]
SRMLSGGFGY	|Q15773|[28_37]
MPRGMQGTSL	|Q6UX01|[331_340]
YSDRSSGGSY	|Q14011|[151_160]
VTDKNPAGDY	|O15040|[1339_1348]
RPANPLGIEI	|Q96KP1|[130_139]
LSDIGSGIRY	|O15111|[125_134]
GRVLFPATGY	|P49327|[882_891]
KVNIIPVIGK	|Q8WYJ6|[162_171]
KVNIVPVIAK	|Q15019|[174_183]
SRGPGTSFEF	|Q99497|[155_164]
SPNGTIRNIL	|O75874|[94_103];|P48735|[134_143]
GAVCSDFFNK	|Q75QN2|[860_869]
HPIEGSTTVF	|P49327|[2248_2257]
RPNSSALETL	|O94804|[451_460]
YAAMFGPKGF	|P50238|[57_66]
IPRGTIGDMM	|Q9H467|[71_80]
ESEPGRGAQY	|Q5T653|[197_206]
AARPVPWNAL	|Q05923|[45_54]
WPKDVGIVAL	|Q01581|[13_22]
RPSQNNTIGL	|Q9H0H0|[903_912]
LPPLPKRPAL	|Q9NR56|[294_303]
APYRDLPASL	|P54259|[1121_1130]
FAHQGNPAVY	|Q9Y6Q9|[1381_1390]
APPVLKRPIL	|Q8N766|[615_624]
LDTNADKQLS	|P06702|[66_75]
ISLKQAPLVH	|P09496|[239_248]
KVNIIPLIAK	|Q6ZU15|[186_195];|Q16181|[186_195]
RPQEVPAEAL	|Q9Y2I1|[1042_1051]
RPNALAVQQL	|Q14671|[390_399]
ATGSWDSFLK	|P62879|[328_337];|P62873|[328_337];|P16520|[328_337]
NPNQNKNVAL	|Q15717|[186_195]
RPADSMLNVL	|Q9BTL4|[207_216]
TTDGLGKVYY	|P14543|[113_122]
RVDPIGPLSY	|Q8TDJ6|[729_738]
KLPPLPVVEK	|Q9NUL3|[274_283]
SVDPHGFISY	|Q3ZCQ8|[207_216]
FLDALDHAGY	|O95786|[73_82]
RPFPGNMSSM	|Q8NFD5|[894_903]
LSDSGVTQRY	|Q9NPF4|[315_324]
QSDMGREAAY	|Q9NX00|[91_100]
ALRDNSTMGY	|Q58FF7|[483_492];|P08238|[610_619];|P07900|[618_627]
SPRENILVSL	|O00767|[281_290]
RPMYGAVTSF	|Q9UKT5|[158_167]
GRFAPQFSGY	|Q13107|[380_389];|Q9Y4E8|[367_376]
SPQSGNFRQL	|Q9H074|[232_241]
SPSWRSTTVL	|O00159|[408_417]
QTALPGNDRY	|Q9UHP3|[71_80]
GRVLLQNTSF	|Q9UI26|[796_805]
QIFVKTLTGK	|P62987|[2_11];|P62979|[2_11];|P0CG47|[2_11];|P0CG48|[2_11]
GRLQVDSAEY	|P10588|[293_302]
KQFDAVLPGY	|O14686|[4858_4867]
GTDDGRLLEY	|Q9HDC9|[233_242]
DSDRGLQEGY	|Q9C0C9|[1085_1094]
ISHDTFGTTY	|Q9H7B2|[254_263]
KPFGYGYPTL	|O95487|[457_466]
GRFFSENSSL	|Q6PK81|[393_402]
GQFSGFPFEK	|P35659|[128_137]
NVEWAKPSTN	|O75821|[311_320]
TSERGSFSLY	|Q99081|[111_120]
AVQKAIPMYK	|P36543|[147_156]
SPRMPVGDFF	|Q9UIF9|[613_622]
RTEEGPTLSY	|P43243|[149_158]
ARFSPDGQYL	|Q2TAY7|[220_229]
QPRGNVDEEL	|P41236|[31_40]
ETDRGMSAEY	|Q9Y512|[206_215]
YSDSLVQKGY	|P52701|[469_478]
GRFGQDFSTF	|Q9Y490|[1272_1281]
AVFPKPFVEK	|Q6PFW1|[189_198]
LPRPWSVPPL	|Q9BYK8|[503_512]
HSDVTEAMLY	|Q13310|[19_28]
VTDHLGVVYY	|Q9NXW2|[287_296]
KVLEIPLEPK	|Q13469|[497_506]
RSDPNSESLY	|Q93073|[379_388]
YSEDHIIGAY	|Q8TCB0|[55_64]
LHLGYLPNQL	|Q92499|[727_736]
YTDPAGLRNY	|Q12770|[533_542]
VSEEDVSSRY	|Q96IZ0|[232_241]
GRYGEVMPVY	|Q6PL24|[271_280]
LPRGMQPTEF	|P28062|[44_53]
RSYGGSYPEY	|Q8NFD5|[431_440]
IPRSILMTTF	|Q16531|[587_596]
STDPREALQY	|Q8N1F7|[541_550]
YLDNVIGHSY	|Q9UJA5|[53_62]
RPYSPSQYAL	|Q14494|[731_740]
TPYGGQFERM	|Q9NR30|[296_305]
FLDANVKESY	|Q92902|[352_361]
LPREATEQEI	|Q9BQ04|[9_18];|Q9BWF3|[9_18]
TTSHLMGMFY	|P39748|[60_69]
TADHNLLLYE	|Q12788|[311_320]
FRMDSSATQF	|A2VDJ0|[387_396]
ETDHINQIGY	|Q9ULK4|[799_808]
KTEVNSGFFY	|Q92526|[241_250];|P40227|[241_250]
SPYFQRPLAL	|P32929|[192_201]
APRDAYWIAM	|O75794|[109_118]
ARYSGSYNDY	|Q96PK6|[646_655]
ATDISRQNEY	|Q13946|[320_329]
SPSNTRYLFL	|P48454|[103_112]
YTDHQNSSSY	|P48436|[442_451]
YTDSEPRATY	|Q9UM82|[338_347]
NPRNFSDNQL	|P37802|[158_167]
YVRETNNQAL	|Q6P9H5|[176_185]
DSDINNRLVY	|Q8TE02|[73_82]
DLDDAQRTLY	|Q9BY31|[31_40]
TSDLQDKNEY	|Q8NFH4|[108_117]
APSEYRYTLL	|Q9BS26|[391_400]
TTESQELSRY	|P42695|[675_684]
ETDKNGFLQY	|Q9NWW6|[46_55]
ASEAEMRLFY	|Q8IY37|[105_114]
YSEGYPGQRY	|P34896|[73_82]
ETDHILESLY	|O75558|[36_45]
LIDQDARDLY	|P07355|[190_199]
ELDHTVSMQY	|P53671|[621_630]
NLDRTDDLVY	|Q14289|[872_881]
STDKAEYTFY	|Q06330|[332_341]
ATEDPWKTNY	|P10768|[109_118]
LTDDGNKWLY	|Q13200|[391_400]
TTDELEKLLY	|Q9NSI6|[1141_1150]
YLDPAQRSLY	|O75820|[30_39]
IRMGTQPIYF	|Q5UE93|[527_536]
ETSADNQHYY	|Q9BZH6|[1019_1028]
FVNDTLRSEF	|Q9P013|[210_219]
FTDVNSILRY	|P07814|[48_57]
APRNQTFTYM	|P11161|[84_93]
RVYSPPEWIS	|Q9P1W9|[201_210]
LLDEAQRLLY	|Q9BWM5|[44_53];|Q3KQV3|[30_39];|Q3SY52|[43_52];|Q68DY9|[43_52]
SLDNSYKMDY	|P42574|[32_41]
YPRQPNYNAL	|O14497|[809_818]
FTDEEGYGRY	|Q12874|[130_139]
YTDFDGTRVY	|Q9P1W9|[194_203];|Q86V86|[201_210];|P11309|[289_298]
ETEEDKFLLL	|Q9NY93|[239_248]
KTYTGPFVYY	|Q9UM82|[112_121]
TSDELEDLRY	|Q6ZMZ3|[871_880]
NPRQINWTVL	|P83731|[45_54]
YRPETGSWVF	|P52948|[866_875]
MMDPNSTQRY	|Q9HAV4|[20_29]
VSERDVYLTY	|Q9H4I3|[256_265]
SRADQFEYVM	|P52434|[83_92]
FLDESRSTQY	|Q9Y230|[433_442]
RPPYYTPNQL	|Q13310|[419_428]
STDFTSRDYY	|O43143|[677_686]
QRLGTQPYFF	|O75431|[195_204]
YVDQAELEKY	|Q01581|[30_39]
QLDTRVSEFY	|O95671|[136_145]
YSEDLSDMHY	|Q9HBG6|[415_424]
GRTYPVQEYF	|Q08211|[565_574]
NSEEMKEAYY	|O14730|[378_387]
TTEESLRNYY	|P22626|[32_41]
YSFDNLPEKY	|O00444|[673_682]
FSDNDKLYLY	|P48382|[56_65]
DLEKEAPWEY	|O15439|[1018_1027]
YADNQVMHFY	|Q07864|[1813_1822]
KTETEPVFWY	|Q8TEQ0|[79_88]
LTEVDNYHFY	|Q16236|[220_229]
RLEIEPEWAY	|Q00688|[189_198]
LTDYFLKDEY	|Q13107|[326_335]
QTDDTWRTEY	|Q9UBW7|[873_882]
YTETEPYHNY	|Q86VM9|[392_401]
FMDPEMETRY	|O60266|[615_624]
ETDEKDFYLY	|Q9GZR7|[571_580]
SPRGSGSSTSL	|Q9H7P9|[45_55]
SPRSNAGIATV	|Q9Y6Y0|[594_604]
RPVASSSTATL	|Q9H422|[568_578]
SPRGFPLGLSA	|Q9P270|[63_73]
RPTGSQGLSSL	|Q9BYD3|[14_24]
APRAGEQGEAM	|Q5JSZ5|[1519_1529]
AVVNKVPLTGK	|Q8WUH6|[100_110]
APRTVALTALL	|P04440|[9_19]
RPSPSSQSSSL	|Q5D1E8|[357_367]
TSDNGKDGLAY	|Q9UM11|[81_91]
KPYQGVGSSSM	|Q12907|[62_72]
LPRNIGNAGMV	|Q12912|[379_389]
IPQGGRGAIQF	|Q15436|[471_481];|Q15437|[473_483]
MPRTGNGPMSV	|O95793|[563_573]
RPIAAGDISTF	|Q96H96|[147_157]
TPRGAGSYTIM	|P21333|[839_849]
GPRAVDVLSEL	|Q8NCN5|[628_638]
GTDGQGGTFRY	|Q9UDY4|[78_88]
KTVPVEAVTSK	|Q14247|[336_346]
GQRCGVEVTSM	|P33121|[238_248]
ALDHAGYSGLY	|O95786|[76_86]
LPNSQKAVKAL	|P29084|[175_185]
TPRDQQGPGTL	|Q5JXC2|[265_275]
APREGISQEAL	|Q9Y490|[1688_1698]
ARLSAIYGGTY	|P50395|[239_249];|P31150|[239_249]
SPAVERLISSL	|Q9BQ52|[618_628]
MPSSSKTKPVL	|Q93074|[1407_1417]
AILPALKQTPK	|Q96LY2|[347_357];|Q96AQ1|[345_355]
YPRGGSSEIAF	|Q6NUM9|[291_301]
APNTGRANQQM	|Q9NZS9|[130_140]
VPRIASKPIIV	|Q9Y217|[165_175]
GRSTGEAFVQF	|P55795|[149_159];|P31943|[149_159];|P31942|[54_64]
VYGIEGRYATA	|P48047|[34_44]
RPYAPINANAI	|O94776|[481_491]
SPNNPFSRVAL	|Q9UNY4|[883_893]
DSLRALGVEQD	|P20591|[57_67];|P20592|[105_115]
NTDRPDASAVY	|P16885|[232_242]
APRLQSEVAEL	|P53990|[107_117]
AIYKTPPGIQK	|Q6W2J9|[147_157]
SPSEARQDVDL	|P46821|[2072_2082]
QPRSPGPDYSL	|Q99684|[17_27]
LPREPGDSAQF	|Q9BSK4|[481_491]
RADPEAGLLLY	|P51530|[325_335]
GRMGSQVIIPY	|Q16795|[74_84]
LPHGGEGWQQL	|Q99640|[305_315]
KLLEPVLLLGK	|P62249|[50_60]
QGYTQPGPGYR	|Q92734|[390_400]
QPRAMGPENNL	|P20592|[79_89]
RPAANPIQFTL	|P23921|[742_752]
VPRNVDELSSL	|Q92610|[917_927]
KVLDTIMATKL	|Q460N5|[278_288]
VSSSDDKDAFY	|P11926|[31_41]
SPYGSDRLVQL	|Q9Y2Y4|[10_20]
GRFSSTTGLFY	|P51817|[142_152]
STIPPELVKQK	|Q9BVS4|[494_504]
VVYSGLENIKK	|Q9HBL8|[109_119]
KPNEFASQINL	|O15371|[472_482]
RPFNTQESSSL	|Q32MH5|[394_404]
MPDSLRSGEYL	|Q8WYP5|[412_422]
NPRDPPSWSVL	|Q9Y490|[1623_1633]
KNLQTVNVDEN	|P62899|[115_125]
RPFQDPDLSSL	|Q8N5A5|[208_218]
QRDPNSPLYSV	|Q9NUU7|[80_90];|Q9UMR2|[81_91]
DSYSSSRSDLY	|P38159|[325_335];|Q96E39|[325_335]
SSINPDHLSYF	|Q9HCE7|[479_489]
RIMDPDVITGY	|P28340|[386_396]
YPMDLGGRNFL	|Q9BUN8|[190_200]
KTDSDSDLQLY	|Q01433|[187_197]
APRWLEEEAAL	|Q53GL7|[646_656]
TTDLFGRDLSY	|P52597|[256_266]
SSDTADFRDLY	|P81408|[500_510]
SPRLSQTFLQL	|Q92608|[1780_1790]
YAYDGKDYIAL	|P01889|[140_150];|Q04826|[140_150];|Q31610|[140_150];|P30499|[140_150];|P01892|[140_150];|P30447|[140_150];|P30460|[140_150];|P30480|[140_150];|P30498|[140_150];|P10316|[140_150];|P18464|[140_150];|P30490|[140_150];|P05534|[140_150];|P30479|[140_150];|P30486|[140_150];|P04222|[140_150]
QLEDGRTLSDY	|P62987|[49_59];|P62979|[49_59];|P0CG47|[49_59];|P0CG48|[49_59]
ETDSSEEISRY	|Q96NL6|[478_488]
LTELLERAAFY	|Q8N697|[42_52]
YTDHQNSSSYY	|P48436|[442_452]
EVESSRTPWLY	|Q15154|[1203_1213]
YIDQGRNPQLY	|Q9BTT4|[70_80]
ATEVDSRWQEY	|Q9UPN3|[309_319]
ETEEDKFLLLY	|Q9NY93|[239_249]
FTENDKEYQEY	|Q9BTL3|[19_29]
GPRDAGNGPQAL	|Q8TE82|[226_237]
ARFSGSGSGTEF	|P04207|[80_91];|P01624|[61_72]
GRNDGVGQISGF	|Q9BRQ8|[333_344]
GSDHQSPSSSSY	|O43298|[137_148]
YPRDASPANTGL	|Q9Y4D8|[2641_2652]
SPRPSSAYNGDL	|Q6P2E9|[33_44]
KVVLTQANKLGV	|O94979|[1209_1220]
SLLTSSKGQLQK	|Q99541|[369_380]
APEWRNGSTSSL	|Q460N5|[1094_1105]
YQHGGVTGLSQY	|Q92900|[1118_1129]
SPRNLGFETSAF	|Q9UBF8|[697_708]
SPRYLQPGGEQL	|Q96N96|[127_138]
TVEETGGDSWKY	|Q9UI26|[392_403]
SPRELLSNSEQL	|O14879|[478_489]
NPRFQEADSPTL	|P26010|[787_798]
YLDRGTGNVSFY	|Q9C037|[449_460]
RSEDPDTSMDSY	|P50416|[428_439]
SPRDPENFPFVV	|P51149|[111_122]
ESENRSYEGTLY	|O95248|[1758_1769]
YLEHGEYEGNLY	|Q14168|[440_451];|Q9NZW5|[404_415]
YSDITIFEKQEY	|Q12882|[211_222]
APAGRKVGL	|P62917|[229_237]
SRFSGGFGA	|O00571|[591_599]
GRVLIGVGK	|Q15393|[957_965]
GRAPVPGPR	|Q6PJF5|[340_348]
RPSGPSKAL	|P48444|[218_226]
KVYGPGVAK	|P21333|[773_781]
LPKPPGRGV	|Q8N531|[341_349]
APRAPRALA	|P53007|[3_11]
VPKGKPLAL	|Q9BSD7|[146_154]
GRYAGGQGY	|O75592|[3226_3234]
RPAPPRAPA	|Q53GL7|[81_89]
VKGPGISKF	|P49961|[86_94]
RPAPGRPPS	|P26572|[31_39]
MPKGAALHL	|Q9NZK5|[105_113]
AAKPHNPGF	|Q12906|[615_623]
TPKLGRGVL	|Q7L590|[625_633]
ARKAVLVAL	|P26640|[636_644]
GRIGQAIAR	|Q9UBQ7|[162_170]
SPIGRDGKL	|P30876|[487_495]
VPRPGKAAF	|O94953|[532_540]
RTGIPTLGK	|P13995|[186_194]
ARLGVISKV	|Q9ULT8|[616_624]
VPSEGKKSL	|Q9BXS6|[156_164]
AVSAKREAL	|Q14055|[541_549]
TPSASRKSL	|Q5SRE5|[1380_1388]
GTMRGIIAK	|P49748|[350_358]
GLFGKTVPK	|P23284|[63_71]
RPAPGRPPT	|Q8WVQ1|[63_71]
SPRPSVGHI	|Q9NXW2|[275_283]
GRSPLIHAV	|P20749|[276_284]
SPVAHRVAL	|Q8TEZ7|[226_234]
GFFKGLGPK	|O75363|[555_563]
KLPEGTLGH	|Q8IY17|[713_721]
ALSGLLLHK	|Q5SXM2|[1313_1321]
LLGPRVIGK	|A8MYP8|[149_157]
GRLASTLVH	|Q00610|[1225_1233]
AVRKPAISL	|Q5VSL9|[202_210]
SPIKRALGL	|Q15751|[2578_2586]
IPSGKRALI	|Q8IZP0|[12_20]
APKRPPSGF	|O15347|[92_100]
KLDIPTAAK	|Q2MV58|[198_206]
KISALALLK	|Q92905|[56_64]
ARTSPVTAR	|P25205|[608_616]
SPITGRSKL	|Q96E52|[217_225]
TPRGTTKVV	|Q14202|[1245_1253]
SPGSRKMVV	|Q9Y4X0|[118_126]
AVTAMKSRP	|Q9BW72|[98_106]
KLGDIMGVK	|Q92620|[474_482]
ARFTGAPLK	|Q13505|[179_187]
VRLGSLSTK	|Q99541|[218_226]
RLSPAPLAH	|Q92545|[1320_1328]
KIASFPTAK	|Q12849|[340_348]
KLADFGLAK	|P50613|[152_160];|Q9C098|[496_504]
GRTPIHVAI	|Q9P2R3|[803_811]
VPASKRPPL	|O60682|[23_31]
MPRGPTLGH	|Q96TA2|[622_630]
SPKLHAEAI	|Q9NQ50|[154_162]
LPKEHAASL	|Q9H0A8|[98_106]
GRTVLVIAH	|Q9NUT2|[660_668];|Q9NRK6|[682_690]
APRVKEGPL	|Q99607|[533_541]
KLLGPVLVK	|O15212|[58_66]
GRTTIVIAH	|P21439|[581_589];|P08183|[579_587]
RPQGKVVAL	|Q6IQ21|[679_687]
IVNPARKGL	|Q9Y6K1|[715_723]
APRAALTRL	|P83436|[566_574]
LPKGKALEL	|Q9ULJ3|[262_270]
APHLSKVSM	|Q8N392|[583_591]
HTFGGPLLK	|Q96PM9|[60_68]
APKRPPSAF	|B2RPK0|[94_102];|P26583|[94_102];|P09429|[94_102]
SIRKPPSSV	|Q86XJ1|[654_662]
ARLVEIAAK	|Q15067|[492_500]
LARRASALL	|Q9Y2E5|[371_379]
DPRRAASSL	|Q16633|[222_230]
AVLGKGHQY	|Q12769|[1360_1368]
SPHGHILVL	|Q9BY44|[323_331]
GRKLISPAM	|Q92609|[465_473]
SVEAVARLK	|Q9H008|[36_44]
ARAKIPLGF	|Q9NR09|[1869_1877]
KVGEVIVTK	|P10809|[344_352]
RILSGVVTK	|P62280|[71_79]
GRMIVGTLK	|O95777|[20_28]
AVKVPSVFK	|Q9H7F0|[197_205]
VTFGHSLSK	|Q16553|[61_69]
ALFQGIAKK	|Q96BP3|[404_412]
GAYGEPRVK	|Q15392|[438_446]
KVADFGLAR	|P42685|[369_377];|P08581|[1219_1227];|Q04912|[1223_1231];|Q9H3Y6|[365_373];|P12931|[404_412]
GLYKAPLSK	|Q8NBM4|[9_17]
RVSAIFVGK	|Q9BTD3|[244_252]
ALNFAARSK	|Q14807|[358_366]
SVPLPISHK	|P51784|[485_493]
AVFASEVKK	|P22087|[277_285]
GLYKGLEAK	|O43808|[265_273]
KIGDFGLTK	|P23458|[1018_1026];|O60674|[991_999]
ALAGHQLIR	|P78527|[28_36]
SPRDPAHTV	|Q15397|[447_455]
VRSPVVHSV	|Q8IZF4|[406_414]
GVAQHREAL	|Q9BQC3|[292_300]
ARIAVSNLH	|P23921|[79_87]
KIGGIFAFK	|P22307|[454_462]
VPSARRPVV	|Q9H6E5|[361_369]
LPASPRARL	|Q3KQU3|[443_451]
LPLARVKAL	|Q9NR33|[41_49]
LRNPLIAGK	|P62316|[110_118]
RPLLKAITA	|Q96GQ7|[227_235]
SPVGKRLLL	|Q7LBC6|[7_15]
HLADILSSK	|Q9UHI6|[324_332]
SPRLAAQKL	|P49454|[3108_3116]
FSGKAYSPK	|P01374|[115_123]
TPGHHLLPL	|O95136|[320_328]
KPAMPRSVV	|P51946|[72_80]
KRMVVPAAL	|Q6NVV1|[30_38];|P40429|[116_124]
TPDQGKARL	|Q53FV1|[74_82];|Q8N138|[74_82];|Q9P0S3|[74_82]
ARKISVVNV	|Q9UKE5|[1017_1025]
EPRVGKTSL	|Q8IXI2|[12_20]
KPSPKTIAF	|Q9BRU9|[149_157]
GPAVKRITF	|Q96RQ9|[324_332]
AQFGGKILR	|Q9P1Y6|[159_167]
YDRPGASPK	|Q12769|[1151_1159]
AAKLEPKSF	|Q99805|[232_240]
KIMSSPLSK	|P61254|[28_36];|Q9UNX3|[28_36]
KLADFGLAR	|Q9NYV4|[874_882];|Q14004|[852_860];|Q00537|[328_336];|Q07002|[278_286];|Q00535|[141_149];|P11802|[155_163];|O94921|[271_279];|Q00534|[160_168];|P50750|[164_172];|Q96Q40|[239_247];|Q00536|[301_309];|Q00526|[142_150];|P06493|[143_151];|P24941|[142_150]
AVTFPLKSK	|Q9NQ25|[36_44]
ATYPIKAVK	|P16885|[1151_1159]
ALMGYATHK	|P09912|[113_121]
RPDSPAHVL	|Q05923|[102_110]
LPKAHVQSL	|Q6N021|[668_676]
IPAKLHNSL	|Q00341|[660_668]
GRAIITKSF	|Q99798|[683_691]
KISDFGLSK	|Q8NFD2|[160_168];|P43405|[509_517];|P43403|[476_484]
SSFSGLLRK	|Q5VY09|[275_283]
ALSSYVVKK	|O95714|[3041_3049]
VLSQKVIAH	|P49914|[35_43]
ALDSHPLSR	|Q8IZY2|[273_281]
SVAEHPLSR	|O60287|[2107_2115]
KMAPTVLVH	|Q6W2J9|[460_468]
RPSNKAPLL	|Q9H9B1|[564_572]
RPAPARPTM	|Q9Y3L3|[567_575]
KPNANRIAL	|P17931|[139_147]
IPIKKSDPV	|P13639|[568_576]
TPRKPVLSV	|Q9BW66|[10_18]
RTIAPIIGR	|Q99459|[83_91]
KLLPSVVLK	|Q99075|[2_10]
HPAAKMIVM	|P50990|[80_88]
GLDPSQRPK	|Q8WVB6|[358_366]
KVIPELNGK	|P04406|[219_227]
ARIAQLVAR	|Q8NHU6|[81_89]
GTDGHVHLY	|Q96EX3|[412_420]
ITRSHTTAL	|Q8NG31|[942_950]
FASGLIHRV	|Q8N6L1|[84_92]
ARNGMPLLK	|Q9UKT9|[411_419]
QVRKAVDAL	|O76021|[35_43]
QRVSGILVK	|Q9UKF6|[479_487]
SPGTRKIEL	|Q86U44|[525_533]
KVSDLTIPK	|Q9H7P9|[378_386]
GRIGFLPKI	|Q9NZN5|[570_578]
RLFIGGIPK	|A0AV96|[152_160]
GRSKTIVQL	|Q9UPN3|[850_858]
QPAPPREAH	|P46778|[131_139]
VVMRDPASK	|P22626|[51_59]
SPESLRSKV	|Q9H361|[594_602];|P11940|[599_607];|Q13310|[608_616]
DTGRILSKL	|A2A3N6|[552_560];|P55036|[67_75]
ASDIAKHVY	|O95164|[32_40]
QVFKLGLAK	|P46781|[113_121]
TIRKAMATL	|Q5PSV4|[226_234]
VVYAPLSKK	|Q9NRZ9|[467_475]
KSSAISLHY	|Q7Z2Z2|[71_79]
RPSLPTQAH	|P49792|[1016_1024]
SLFSKEAPK	|Q9GZR7|[67_75]
TRVFSLVGK	|P13073|[4_12]
RVFTGVVTK	|Q8IX12|[148_156]
QRVGIIPPK	|P62333|[160_168]
AVRPVFAHL	|Q14156|[253_261]
RLLASTLVH	|Q9NYF8|[569_577]
SPHTPSTHF	|Q14186|[80_88]
QIRKAPQAV	|O00472|[165_173]
RPKPIITSV	|P0CG13|[109_117]
RPTLPVKSL	|Q7Z422|[80_88]
KLLAIPVEK	|O75717|[200_208]
RPKAQPTTL	|Q6P2C8|[147_155]
LPRKQGSIL	|Q9H2U1|[300_308]
GSYESTLKK	|Q6ZSC3|[235_243]
KPRLPLASM	|Q9HAW4|[891_899]
LPKARPMSL	|P42695|[1341_1349]
RPLVVKTSL	|P78345|[17_25]
RLVQGSILK	|P12004|[5_13]
RLGNSLLLK	|Q10570|[387_395]
SPKIASHQF	|Q9Y6Q9|[489_497]
SPRPKMDAI	|Q5SSJ5|[156_164]
IPRKSSVDL	|Q8NEM7|[504_512]
APRLETKSL	|Q6P6C2|[289_297]
TPARKEISL	|Q8NDZ2|[397_405]
SPKKPVIVF	|O75643|[1554_1562]
IRAGLIPKF	|P52292|[116_124]
SRSKIVLLV	|Q93073|[207_215]
RTSTSTLLH	|Q14157|[712_720]
TPSSVRKQL	|Q8IWZ3|[1954_1962]
RLGDSQLVK	|Q16531|[327_335]
KPGMKLTEL	|P12270|[390_398]
KIPAVTYPK	|Q7L0Y3|[43_51]
RLFVGSIPK	|O60506|[244_252];|O43390|[247_255]
GRTIPVVFK	|P25685|[278_286]
ARTAVYSLH	|Q9NRN9|[149_157]
GRLVLSNKM	|Q13948|[608_616]
ARVVQKLGF	|P20226|[238_246];|Q6SJ96|[275_283]
VPRPTKSSF	|Q5VVJ2|[548_556]
LPKKEGLSF	|Q6WKZ4|[293_301]
RLTTPVFGK	|Q16850|[133_141]
APMIKKIAF	|Q5UIP0|[286_294]
YPATKKQAL	|Q9H2M9|[587_595]
VPRVPTHTL	|Q8IWZ3|[715_723]
QRFASIVAK	|A3KN83|[1003_1011]
KVNAVFSQK	|Q9P1T7|[150_158]
KVYTPVASR	|Q9NS91|[115_123]
AIFKPVMSK	|Q13547|[239_247]
VPVHKLQSL	|O14910|[45_53]
RVLTGVFTK	|Q460N3|[619_627]
ARDLLHPSL	|Q71UM5|[4_12]
KVYTPSISK	|Q5VV42|[496_504]
GRSLIINHL	|Q9H892|[373_381]
VRLPLLSPK	|Q9Y2M5|[257_265]
VPRKQPISV	|Q9Y2W6|[212_220]
TRSAIILHL	|P53350|[517_525]
RQVIPIIGK	|Q96RU3|[239_247]
KSYPSLTTK	|Q15029|[612_620]
KLATTILQH	|P78527|[1617_1625]
KIFSGVFVK	|Q6DKI1|[114_122]
IPREVAVKL	|Q9NZJ4|[2488_2496]
RPQVAKTLL	|Q9ULT8|[439_447]
RPKALTQVL	|Q9Y2Q5|[3_11]
VARRVLQAL	|P39019|[99_107]
IPLIKKNSL	|Q5VYK3|[1659_1667]
RLSSVVTQH	|P54577|[135_143]
RVMAPRALL	|Q29865|[2_10];|P10321|[2_10]
TPRLRAVTL	|Q5VW36|[536_544]
IPDGHTKEM	|P07814|[702_710]
KPGDFIHTL	|P04818|[244_252]
SRIAENLPK	|Q96KR1|[822_830]
VPSKRQEAL	|Q86UP2|[186_194]
IPQGERKTV	|Q8N9R8|[51_59]
GRLDAVLQR	|P29590|[317_325]
KPQSVTVRL	|Q7Z5K2|[575_583]
KPKDVDLTL	|Q5TAP6|[619_627];|Q9BVJ6|[620_628]
IVAKRLESL	|Q9Y2G9|[868_876];|A3KN83|[1008_1016]
KLYTLPASH	|P49815|[574_582]
HPTLLQHAL	|Q12980|[96_104]
GLYPKPMPK	|Q8NBA8|[273_281]
FRIEGLAPK	|Q8N4H5|[2_10]
KPKNTIAIF	|O60488|[148_156]
KPKTNIAIF	|O95573|[157_165]
SRTDILSLK	|Q5SWH9|[27_35]
RLLTSITTK	|Q9NQW6|[909_917]
KIFSSLPLK	|Q9HCM1|[911_919]
HVYTPSTTK	|Q9H9E1|[113_121]
KPQPPPRTL	|A6NHT5|[47_55]
STSERTLLK	|Q6P2E9|[165_173]
GRNFWVSGL	|Q15424|[405_413]
GRLPLQPRV	|P18627|[112_120]
ALDTKIGRY	|O60264|[920_928]
VVNPKVFPH	|O75140|[24_32]
SLYDAVLKK	|Q7Z2Z2|[303_311]
KPLPPSERL	|O15523|[136_144];|O00571|[138_146]
KLGNFFSPK	|P46940|[80_88]
LAHVDLIEK	|P62875|[50_58]
TPINKRPVL	|Q4LE39|[325_333]
SMFTAILKK	|P50851|[112_120]
SPRLPAREL	|Q9H1K1|[20_28]
RPLKVPSEL	|Q8IZE3|[645_653]
RVPDVVLIK	|Q96D46|[397_405]
KVNSMVAYK	|Q13257|[192_200]
KPQEAPKEL	|Q92917|[61_69]
SPLKKEQPL	|Q53H80|[134_142]
RLNVTPLAR	|P24752|[303_311]
NRTIVITSH	|P31689|[282_290]
VVDPVVREK	|Q9UKV0|[36_44]
GTPEKPLYH	|O60337|[16_24]
SPREKTPEV	|A6H8Y1|[965_973]
GLDDPRLEK	|P30533|[145_153]
IPIKSRDTL	|Q5T5J6|[236_244]
GMNKMVINH	|P50990|[51_59]
VRNLSTILK	|O60671|[24_32]
ATFHTPFSH	|O75521|[266_274]
IPRAKAEEM	|P62993|[65_73]
MRAAINQKL	|Q9NPA8|[12_20]
RMLAQQAVK	|P04844|[619_627]
KPYLPSRAL	|P51587|[2882_2890]
KLYPLPSAR	|Q8TBM8|[36_44]
[truncated: 3,664 more rows]

## Sheet: GRLCL_spliced
sequence	annotation
SPGGPRPAI	|A6NM66|[33_34_12_18]
RGPPAGLAL	|Q6PCB0|[24_28_8_11]
AARAVTGVI	|Q9UG63|[69_76_88_88];|Q9UG63|[69_76_89_89]
SPALKACGL	|P49327|[1221_1227_1217_1218]
APRAPPAAL	|Q9Y644|[42_47_20_22];|Q6ZN55|[704_708_718_721];|Q96I13|[98_101_113_117];|Q9NX05|[53_56_68_72];|Q6ZW31|[259_260_258_264];|Q6ZW31|[281_282_258_264]
GGKLHSVPA	|Q9UPM8|[256_259_266_270]
GPSGLRPAL	|P98161|[4261_4263_4265_4270];|P98161|[4286_4288_4265_4270]
PRVVAAAAL	|Q8N8A6|[386_392_403_404];|P0C879|[109_113_91_94]
GPADRAAVI	|Q8IW40|[156_163_166_166]
APTIRAGAL	|Q5HYR2|[3_4_15_21];|Q5HYR2|[7_8_15_21];|Q5HYR2|[38_39_15_21]
APAARAMAL	|Q9H2U2|[12_15_30_34]
APAPRAPSL	|Q9Y644|[40_46_54_55];|Q9Y644|[40_45_53_55];|Q9Y644|[40_44_52_55];|Q9UJW9|[72_75_48_52];|Q9UJW9|[72_74_47_52]
PSVGPVLGR	|Q8HWS3|[666_672_663_664]
SPAALSRAL	|Q96B18|[316_323_307_307];|Q96B18|[316_323_320_320];|Q96B18|[316_322_319_320];|P27105|[244_248_231_234]
APIGVHPSI	|Q9Y4C2|[90_97_92_92];|Q9Y4C2|[90_97_104_104]
PKSLPVPPG	|Q9Y242|[199_205_208_209];|Q9Y242|[199_204_207_209]
APAPARPIT	|P48444|[213_219_200_201]
GQLHVAEAA	|Q86U10|[528_529_538_544]
PRSPALLAA	|A6NL88|[432_437_447_449]
ARAPASVLL	|P13861|[43_50_22_22];|P13861|[43_50_29_29];|P13861|[43_50_40_40];|P13861|[43_50_50_50];|P13861|[43_50_59_59];|O15021|[75_79_85_88];|O15021|[75_78_84_88];|O15021|[75_77_83_88];|O15021|[75_76_82_88]
PHGAPSLLL	|Q6PFW1|[496_498_514_519];|P08514|[368_369_372_378]
VAPLPHTAV	|Q2NL68|[173_176_156_160]
SIGTVSLTK	|Q9Y394|[190_191_165_171]
PSKPNGPVI	|O75445|[2844_2850_2829_2830];|O75445|[2844_2850_2838_2839]
LAPAPRDGL	|Q6ZRS2|[1327_1332_1319_1321];|Q6ZRS2|[1327_1331_1318_1321];|Q6ZRS2|[1327_1330_1317_1321];|P52333|[796_798_797_802];|Q6ZRS2|[1327_1329_1316_1321]
PKSLPVATP	|P56559|[132_138_120_121]
APGVRAVEI	|Q9Y508|[72_79_84_84]
LPAARTTAL	|Q8N9H6|[64_65_40_46]
VPATRSATL	|Q8TDP1|[25_28_17_21]
PHVGPLAII	|P54198|[907_909_884_889]
LHPALPSAL	|Q9Y3R5|[71_77_74_75];|Q9Y3R5|[71_77_83_84];|P14735|[9_15_12_13]
ASFGEGLLK	|Q9BQS8|[1358_1363_1340_1342]
PSAPISPPR	|Q99941|[420_426_426_427];|Q99941|[420_426_435_436]
APLPDGRSI	|Q15648|[380_387_396_396];|Q15648|[380_387_407_407]
PRAPASTDL	|Q9UKB1|[476_482_469_470]
VPVAKTAEI	|P49790|[551_558_531_531];|P49790|[551_558_545_545];|P49790|[551_558_569_569];|P49790|[551_558_570_570]
SPIEKSGVI	|Q8NG31|[837_844_827_827];|Q8NG31|[837_844_839_839];|Q8NG31|[837_844_850_850]
APHNPAPPM	|Q01628|[34_41_22_22];|Q01629|[38_39_35_41];|Q01629|[29_29_34_41];|Q01629|[38_38_34_41]
IPSASLSMK	|Q5XG87|[692_696_715_718]
HVVANPSPL	|P01375|[91_96_71_73]
PARVPAPLL	|Q9UKB5|[71_77_52_53]
PGAPLRLNP	|P21333|[271_276_279_281]
PHTNIPGSI	|Q7LBE3|[249_253_234_237]
VSVAAFQSK	|Q969Q5|[173_179_155_156]
KPVTGTTSF	|Q6P2C0|[290_296_270_271];|P56645|[487_492_506_508]
PKLLGPLSL	|Q96LC7|[446_451_438_440]
PTRTPALSP	|P18887|[278_283_265_267]
PSIVNIVAK	|Q8WZ42|[17045_17047_17061_17066]
PPGPKELVI	|Q92917|[86_89_67_71];|Q92917|[86_88_66_71]
PRVPPSLLA	|A4D2P6|[73_79_55_56];|A4D2P6|[73_79_68_69];|Q8IYJ3|[387_392_401_403]
AHLAAKNIL	|Q5TAX3|[350_354_330_333]
VPQPSGRTI	|O95644|[568_575_553_553];|O95644|[568_575_585_585]
PTRPTAAEI	|A6NE01|[560_561_559_565];|A6NE01|[569_570_559_565]
PSDKALVLI	|Q03001|[4336_4343_4330_4330];|Q03001|[4336_4343_4360_4360]
VIAQTLPSQ	|Q5VWT5|[216_217_191_197]
LPPPARPPI	|Q6BCY4|[237_241_216_219]
PHSPALQPI	|Q9UPW6|[272_274_287_292]
ILDVSLGRS	|Q13796|[901_906_917_919]
FAEIPVSAK	|Q9H1E1|[8_8_22_29];|Q9H1E1|[39_39_22_29]
ALSPVLIPR	|O14686|[4736_4740_4743_4746]
FPVLPGSHI	|Q07864|[2087_2094_2066_2066];|Q07864|[2087_2094_2070_2070];|Q07864|[2087_2094_2105_2105];|O14709|[176_176_154_161]
IHNNAAKSL	|Q86XZ4|[196_198_204_209]
GKSIHELAI	|Q13156|[217_223_234_235];|Q13156|[217_223_238_239]
VPSEPKLLS	|Q6L8Q7|[43_49_21_22];|Q6L8Q7|[43_49_49_50];|Q6L8Q7|[43_49_51_52]
PEGSALRLQ	|P04844|[275_279_288_291]
QVISTPSIK	|Q13131|[92_98_88_89]
LHSPANSHL	|Q8IWZ5|[154_156_135_140]
LTFVPNTGK	|Q9Y277|[97_98_103_109]
GQHKPPITV	|Q9H7Z6|[411_413_433_438]
LGLYPLSSK	|Q86VZ1|[123_124_126_132]
PSRQPIPAI	|P78563|[305_311_295_296]
VPSPRTLPL	|Q9HB65|[237_240_232_236]
PRGQVDVPL	|P46934|[537_538_523_529]
APRAFIPLP	|Q9NRG7|[245_246_265_271]
NVFPPPVRG	|O43184|[192_197_175_177]
PNLVAERAL	|A6NK06|[314_315_294_300]
QVIVGVLQK	|Q8N365|[183_184_164_170]
ARPAVFPDL	|Q9BQT9|[652_656_667_670]
EICSQKAVL	|Q5VU65|[112_113_88_94]
KRFSLGVAL	|Q8IZS8|[595_596_614_620]
VPREPPVSI	|Q8TEQ8|[90_97_75_75];|Q8TEQ8|[90_97_110_110];|Q8TEQ8|[90_97_113_113]
PPSPLRFSP	|Q9HCD6|[1532_1537_1516_1518];|Q9HCD6|[1532_1536_1515_1518]
KSLEHGITL	|Q9Y2I7|[776_777_765_771]
APPPIKHNM	|Q7Z739|[288_290_269_274];|Q9BYJ9|[283_284_263_269];|Q9BYJ9|[289_290_263_269];|Q7Z739|[288_289_268_274];|Q9Y5A9|[287_288_267_273];|Q9BYJ9|[242_242_262_269];|Q9BYJ9|[283_283_262_269];|Q9BYJ9|[289_289_262_269];|Q7Z739|[246_246_267_274];|Q7Z739|[264_264_267_274];|Q7Z739|[288_288_267_274];|Q9Y5A9|[247_247_266_273];|Q9Y5A9|[260_260_266_273];|Q9Y5A9|[285_285_266_273];|Q9Y5A9|[287_287_266_273];|Q9Y5A9|[…
VVIKETLPN	|Q01658|[39_40_22_28]
SVRPLVTEI	|P57740|[315_322_329_329]
LTPLKSLEL	|P27169|[256_262_239_240]
PSMSQRLPV	|Q9ULL4|[754_759_761_763]
PRLVCNTTL	|Q9P2P6|[4602_4603_4590_4596]
ASELHTSIY	|P17342|[253_255_229_234]
NTVPFKTTI	|Q9Y5B6|[372_378_387_388]
PPWLALAPR	|Q6ZRS2|[1996_2000_1999_2002];|O94885|[1058_1061_1038_1042]
HQVDIGLQL	|P00739|[185_191_171_172]
LPRVQVAQI	|Q8NBM4|[126_127_147_153];|Q8NBM4|[126_126_146_153];|Q8NBM4|[131_131_146_153];|Q8NBM4|[137_137_146_153];|Q8NBM4|[154_154_146_153];|Q8NBM4|[157_157_146_153];|Q8NBM4|[164_164_146_153];|Q8NBM4|[168_168_146_153];|Q8NBM4|[170_170_146_153];|Q8NBM4|[172_172_146_153]
LIYPTAPPR	|Q5VWZ2|[37_37_57_64];|Q5VWZ2|[45_45_57_64];|Q5VWZ2|[49_49_57_64]
DQIKARALL	|P04920|[409_413_421_424]
PRVPPFSTM	|Q9H361|[453_456_456_460];|P11940|[474_476_461_466]
PFPDVESIK	|Q8TEQ6|[1456_1460_1450_1453]
LQVGLHQQL	|P05000|[124_126_111_116]
RPVLQPQSI	|Q86TB9|[111_117_124_125]
HQVYPVNSV	|Q9H0J9|[667_671_652_655]
ETIISRVTK	|O75592|[4163_4166_4154_4158]
FPQPRLPVT	|Q6DCA0|[123_129_104_105];|Q6DCA0|[123_129_140_141]
CPLLKPWAQ	|P04075|[290_297_275_275];|P04075|[290_297_307_307]
PNSLDEILR	|Q96JJ3|[489_493_506_509]
PQLRSLTEI	|P04626|[159_161_143_148];|P04626|[159_160_142_148];|P04626|[122_122_141_148];|P04626|[128_128_141_148];|P04626|[134_134_141_148];|P04626|[159_159_141_148]
QELLPSCIY	|Q6PIF6|[1349_1356_1336_1336];|Q6PIF6|[1349_1356_1361_1361]
TGDMLQLEY	|Q8WVZ9|[131_132_149_155];|Q86V97|[131_132_149_155]
PRVPPVEYL	|P35555|[442_444_430_435]
PTDTNVLRY	|Q8N6N2|[202_209_182_182];|Q8N6N2|[202_209_187_187];|Q8N6N2|[202_209_193_193];|Q8N6N2|[202_209_210_210];|Q8N6N2|[202_208_192_193];|Q8N6N2|[202_208_209_210];|Q8N6N2|[202_207_191_193];|Q8N6N2|[202_207_208_210];|Q8N6N2|[202_206_207_210];|Q8N6N2|[202_205_206_210];|Q8N6N2|[202_204_205_210];|Q8N6N2|[202_203_204_210];|Q8N6N2|[202_202_203_210]
PRGPAPAAL	|Q68DA7|[485_487_495_500]
APRSPGSLA	|Q9Y4B5|[74_78_89_92];|Q9Y6R9|[108_111_104_108];|Q9BZI1|[30_33_12_16];|Q9Y4B5|[74_77_88_92];|Q9Y4B5|[74_76_87_92]
ARLIAGPGL	|Q9UKP6|[232_234_220_225]
RPLGAGEAI	|Q96SI9|[256_263_246_246];|Q96SI9|[256_263_251_251];|Q96SI9|[256_263_275_275]
RSFSGGFGA	|O15523|[585_586_591_597];|O00571|[587_588_593_599]
PSGPNVAHL	|Q5THJ4|[1031_1031_1045_1052];|Q5THJ4|[1043_1043_1045_1052];|Q5THJ4|[1047_1047_1045_1052]
GPSFKASSI	|Q96PE3|[317_324_301_301];|Q96PE3|[317_324_302_302];|Q96PE3|[317_324_340_340]
PNRGPIGAL	|A0PJW6|[82_86_105_108]
PRAPSPSSP	|Q14CZ8|[379_383_382_385];|Q86VQ1|[122_124_104_109];|P49757|[262_263_236_242]
PRTGPGAEL	|Q9C029|[6_11_21_23]
PRSPSALGI	|O43306|[232_237_216_218]
RPSPGTTLA	|P53674|[60_60_33_40]
APRTVVSGI	|Q12904|[185_192_184_184];|Q12904|[185_192_208_208]
ISREAGGAF	|O15303|[236_242_232_233]
PHSPLASSL	|Q68CP9|[1471_1473_1451_1456]
HVNGVITGL	|Q86VY9|[25_27_6_11]
VAGHRISAV	|Q9H6R3|[561_568_551_551];|Q9H6R3|[561_568_555_555];|Q9H6R3|[561_568_558_558];|Q9H6R3|[561_568_561_561];|Q9H6R3|[561_568_581_581];|Q9H6R3|[561_568_586_586];|Q9H6R3|[561_568_587_587];|Q9H6R3|[561_567_585_586]
SPVLGLRGL	|Q96T92|[234_239_251_253]
IPSGGRQSL	|Q8TDX9|[1081_1087_1100_1101]
PRAPSSSTL	|Q5SNV9|[858_861_846_850]
KPLEGSATI	|Q9UPV9|[578_585_576_576];|Q9UPV9|[578_585_600_600]
KPMEAASAL	|Q9BVP2|[332_339_314_314];|Q9BVP2|[332_339_320_320];|Q9BVP2|[332_339_322_322];|Q9BVP2|[332_339_341_341];|Q9BVP2|[332_339_351_351];|Q9BVP2|[332_338_319_320];|Q9BVP2|[332_338_321_322];|Q9BVP2|[332_337_318_320]
ARVPTSSSI	|Q15772|[2307_2311_2321_2324]
GRGTPMMGI	|P14678|[208_213_203_205]
SPYTKGASI	|Q9H6H4|[78_85_57_57];|Q9H6H4|[78_85_59_59];|Q9H6H4|[78_85_68_68];|Q9H6H4|[78_85_103_103];|Q6NUK4|[78_85_70_70];|Q6NUK4|[78_85_74_74];|Q6NUK4|[78_85_87_87];|Q6NUK4|[78_85_103_103]
RSPPGAPEL	|Q86VR2|[359_364_380_382]
RPAGALLLL	|Q9H1X3|[34_39_30_32];|P50336|[62_67_72_74];|Q5SXM2|[1339_1344_1317_1319];|Q5SXM2|[1339_1344_1362_1364];|Q2T9J0|[270_275_250_252];|Q9NUB4|[87_90_71_75];|P04066|[9_12_14_18];|Q9UI38|[13_14_22_28]
PRAPGPQGF	|P02458|[208_209_217_223];|P02458|[241_242_217_223];|P02452|[186_187_195_201];|P02452|[219_220_195_201];|P08123|[98_99_107_113]
PSRPSSPSL	|O43815|[377_382_368_370];|Q96CP6|[28_31_15_19];|Q9NZM4|[800_803_775_779]
PSRPESGTV	|Q9UQ84|[394_395_378_384]
RSPTAEGVL	|Q4AC94|[1183_1185_1187_1192]
SPLLRCGLA	|Q9H7Y0|[170_175_167_169]
RPSPNCGSL	|Q6UUV7|[534_537_540_544]
RPGDPGPEI	|Q96NS8|[33_34_54_60]
RTALVSGSF	|A1L4Q6|[62_66_45_48]
PARQSVIPA	|Q8TE49|[766_772_764_765];|Q8TE49|[766_772_766_767];|Q8TE49|[766_772_786_787]
LPALRSLGL	|P0DKB5|[141_147_140_141];|Q15735|[961_965_957_960];|Q15735|[961_964_956_960]
NVRLPGTAL	|P06756|[504_506_493_498]
GLRPTVDAL	|Q6XUX3|[229_235_215_216];|Q6XUX3|[229_235_251_252]
APGLRMDAL	|Q8N4S7|[199_201_207_212]
PAGLGRDFL	|Q9BYZ6|[359_362_335_339]
RPNGTSAMI	|Q6P2C8|[182_189_166_166];|Q6P2C8|[182_189_169_169];|Q6P2C8|[182_189_178_178];|Q6P2C8|[182_189_201_201];|Q6P2C8|[182_189_209_209]
SPMGTRSTI	|P09958|[507_514_503_503];|Q6UW60|[512_519_508_508];|Q6UW60|[512_519_523_523]
RPASGYSTL	|Q9P227|[1238_1240_1248_1253]
RSIGTSTSF	|O95235|[243_244_251_257]
PARVQLAGF	|Q8IUG5|[1238_1239_1241_1247]
LPSDDRGSL	|Q9Y2G9|[687_693_673_674]
RGLGVFPVD	|A5YKK6|[383_386_389_393]
RGTWGALLS	|Q96H72|[40_42_56_61]
LLNSHCGFA	|Q9UHR4|[217_220_200_204]
GRPSNPLLL	|Q8WXG6|[459_463_455_458]
LPRALLSSI	|Q96RQ9|[269_276_262_262];|Q6AI08|[776_780_796_799]
SPSQPRDAI	|Q9Y2D5|[135_142_115_115]
RPTEGVQAI	|Q9NP80|[293_300_275_275];|Q9NP80|[293_300_287_287];|Q9NP80|[293_300_306_306];|Q9NP80|[293_299_274_275]
RPSIGLDTL	|Q8IVF5|[782_785_770_774]
QPRLSGSDI	|O95613|[2473_2480_2494_2494];|O95613|[2473_2480_2495_2495]
GRCPGILFL	|Q6UWB1|[540_542_519_524]
LRGPSGIIY	|Q7Z408|[409_416_425_425]
TGRAYPAQI	|Q9NX74|[342_343_362_368]
AAYLRALSI	|O15294|[246_253_229_229];|O15294|[246_253_240_240]
ASKSQALIY	|P42345|[1979_1982_1970_1974]
IPSIRNGII	|Q93008|[1578_1585_1572_1572];|Q93008|[1578_1585_1578_1578];|Q93008|[1578_1585_1581_1581];|Q93008|[1578_1585_1585_1585];|Q93008|[1578_1585_1588_1588]
PFRPPLASV	|Q9UPX8|[1009_1011_1015_1020]
LSNAQAIRN	|P48380|[470_473_457_461]
GRWPSIASL	|Q99698|[2260_2264_2243_2246]
FPRVSTPLA	|P12259|[1001_1004_985_989]
FPQVGRTAI	|P49682|[207_214_188_188]
SPSYIDGRP	|Q96M20|[299_302_313_317]
ASGDDIPRY	|P47989|[587_589_595_600]
VRPQPPTSL	|Q6NUS6|[20_24_33_36]
GPREALIQI	|Q15776|[64_71_70_70];|Q15776|[64_71_90_90];|Q15776|[64_70_89_90]
PSRIPIDSL	|Q8NEZ4|[1859_1864_1866_1868]
PRLSITVLV	|Q9Y5E8|[429_431_436_441]
TPRVPDNSI	|Q13829|[258_265_246_246]
GRNIPMISL	|Q9UDY4|[274_279_256_258]
QPRNGLVAF	|Q96Q15|[2942_2946_2961_2964]
IRPGTAFEI	|Q15149|[4095_4102_4094_4094];|Q15149|[4095_4102_4095_4095];|Q15149|[4095_4102_4114_4114];|Q15149|[4095_4102_4117_4117]
SRFGTLVNI	|Q5T8P6|[554_561_546_546];|Q5T8P6|[554_561_575_575];|Q5T8P6|[554_560_545_546]
NLRCIVSGF	|Q9H5Z1|[617_617_607_614]
FRSVNGLAF	|P35606|[424_424_442_449];|P35606|[428_428_442_449];|P35606|[437_437_442_449];|P35606|[449_449_442_449];|P35606|[469_469_442_449]
HNLEKGLSL	|Q9Y4A5|[2700_2702_2716_2721]
LPSPFLRAI	|O95456|[184_191_164_164];|O95456|[184_191_166_166];|O95456|[184_191_211_211]
IPDANRDTL	|Q8N392|[444_444_447_454];|Q8N392|[465_465_447_454]
NHEGGLILY	|Q9UIG8|[658_663_639_641]
AHNVKAMVF	|Q9Y5A7|[148_155_169_169]
SPRITFPSI	|P51451|[190_197_174_174];|P51451|[190_197_179_179];|P51451|[190_197_189_189];|P51451|[190_197_193_193]
PRSEALFSI	|Q8IY92|[1208_1212_1191_1194]
RPSTLVSFL	|Q8NGT0|[89_89_79_86];|Q8NGS8|[89_89_79_86];|Q8NGS9|[89_89_79_86]
ASEHSTIIY	|P61962|[193_194_210_216]
NRCTLVTTL	|Q9HD20|[994_994_978_985]
PSRFSTLTI	|P01599|[59_63_72_75];|P01601|[81_85_94_97];|P01610|[59_63_72_75];|P01612|[59_63_72_75];|P01596|[59_63_72_75];|P01600|[59_63_72_75];|P01602|[81_85_94_97];|P01597|[59_63_72_75];|P01604|[59_63_72_75];|P01611|[59_63_72_75];|P04432|[81_85_94_97];|P01609|[59_63_72_75]
HPNSNLLDI	|P63010|[191_198_187_187];|P63010|[191_198_204_204]
SRFPTTMAI	|Q93084|[893_900_886_886];|Q93084|[893_900_907_907]
QPQHAFNAI	|Q99967|[43_50_56_56];|Q99967|[43_50_69_69]
GPRQVLFPI	|Q9Y5F8|[12_19_33_33];|Q9Y5F8|[12_19_37_37];|Q9Y5F9|[12_19_33_33];|Q9Y5F9|[12_19_37_37];|Q9Y5F8|[12_18_32_33];|Q9Y5F9|[12_18_32_33]
PRTPLSYSI	|B2RTY4|[774_779_767_769]
TPFPFRTGI	|Q9H8K7|[255_262_238_238];|Q9H8K7|[255_262_276_276];|Q499Y3|[90_97_111_111]
ADTDSPLRY	|P08865|[129_130_150_156]
LSSSWSIMK	|Q12770|[385_387_389_394]
IPRLIVSQI	|Q9BXW9|[172_179_170_170];|Q9BXW9|[172_179_172_172];|Q9BXW9|[172_179_176_176];|Q9BXW9|[172_179_196_196];|Q9BXW9|[172_179_200_200]
TRMDSNFGI	|O43463|[377_384_398_398]
SPNLRILDL	|O60602|[79_79_95_102];|O60602|[104_104_95_102];|O60602|[105_105_95_102]
APRDPIPYI	|P08621|[14_21_19_19];|P08621|[14_21_41_41]
QRNQAIQAI	|Q92995|[742_749_732_732];|Q92995|[742_749_735_735];|Q92995|[742_749_736_736];|Q92995|[742_749_747_747];|Q92995|[742_749_764_764];|Q92995|[742_748_734_735];|Q92995|[742_748_746_747];|Q92995|[742_747_745_747]
ELNLVAHCF	|Q92777|[150_156_129_130]
RYPSIITSL	|Q8NGH8|[134_140_159_160];|Q8NGI1|[140_146_162_163]
ERSLGCLLY	|Q9HC98|[217_218_232_238];|Q8TDX7|[206_207_221_227]
KGDSMQLIY	|Q5SXM2|[401_402_383_389]
LPRQVSENL	|O75815|[142_142_160_167];|O75815|[143_143_160_167];|O75815|[144_144_160_167];|O75815|[149_149_160_167];|O75815|[167_167_160_167];|O75815|[175_175_160_167];|O75815|[180_180_160_167];|O75815|[188_188_160_167]
RPMPDIDTI	|Q9NQC8|[202_209_183_183];|Q9NQC8|[202_209_186_186];|Q9NQC8|[202_209_207_207]
IPRNTVVIF	|P11021|[437_443_450_451]
TRISNIFVI	|Q8TD47|[220_227_222_222];|Q8TD47|[220_227_225_225];|Q8TD47|[220_227_228_228];|Q8TD47|[220_227_236_236];|Q8TD47|[220_227_244_244];|Q8TD47|[220_227_248_248];|Q8TD47|[220_226_227_228];|Q8TD47|[220_225_226_228];|Q8TD47|[220_224_225_228];|Q8TD47|[220_223_224_228];|Q8TD47|[220_222_223_228];|Q8TD47|[220_221_222_228];|Q8TD47|[220_220_221_228];|Q8TD47|[247_247_221_228]
PSMRRNNSI	|Q15842|[408_408_391_398];|Q15842|[415_415_391_398]
HSPSPFYQL	|Q8TEK3|[457_459_458_463];|Q8TEK3|[470_472_458_463]
NPRDNFLSI	|Q8IUR6|[54_61_68_68]
ASDELRLLY	|Q9Y4W2|[89_90_109_115]
RCTFHTIGF	|Q07352|[172_173_160_166];|P47974|[211_212_199_205]
HGLGLLYYF	|Q5TEA6|[375_381_361_362];|Q5TEA6|[375_381_381_382];|Q5TEA6|[375_381_397_398]
PVRTVQNSW	|O75592|[2032_2039_2055_2055];|O75592|[2032_2038_2054_2055];|O75592|[2032_2037_2053_2055]
TSECSEIRY	|O95150|[159_166_147_147];|O95150|[159_166_150_150]
QIRDIMQAI	|Q15554|[120_127_121_121];|Q15554|[120_127_124_124];|Q8IWZ5|[655_661_681_682]
PSRNLFQDL	|Q9Y4G8|[846_849_836_840]
DYDKYGLGY	|P53350|[416_417_419_425]
PSQPRWLLP	|Q7Z2Y5|[389_395_373_374];|Q7Z2Y5|[389_395_395_396]
ENTDSPLRY	|P08865|[136_136_149_156]
FPSYRDVTI	|Q5T6V5|[189_196_211_211]
IPNERTMQI	|Q8N1B4|[527_534_509_509];|Q8N1B4|[527_534_523_523];|Q8N1B4|[527_534_527_527]
NPRIPYTEI	|Q92830|[656_663_642_642];|Q92830|[656_663_659_659];|Q92830|[656_663_667_667];|Q92830|[656_663_668_668];|Q92830|[656_663_674_674];|Q92830|[656_663_675_675];|Q92830|[656_663_679_679];|Q92831|[651_658_637_637];|Q92831|[651_658_654_654];|Q92831|[651_658_662_662];|Q92831|[651_658_663_663];|Q92831|[651_658_669_669];|Q92831|[651_658_670_670];|Q92831|[651_658_674_674];|Q92830|[656_662_673_674];|Q92831|[…
EHSLIDTQY	|P28340|[947_950_952_956]
RQQVELYGI	|O00206|[780_786_765_766]
ADDELRLLY	|Q9Y4W2|[92_93_109_115]
RSFLMPEAY	|O43166|[173_174_153_159]
TRWSALLYL	|Q5M7Z0|[319_322_328_332]
GRFEDVYQI	|Q9HBH9|[77_84_56_56];|Q9HBH9|[77_84_102_102];|Q9HBH9|[77_84_105_105]
PRQEVYVIQ	|Q8IY22|[507_511_498_501]
QPMDTRQLY	|A5PLN9|[244_250_252_253]
PRLEHCIEY	|Q8TBC4|[243_245_247_252]
ELETNQWQL	|Q8TC57|[342_347_336_338]
QPRPEMDMY	|Q96BN8|[40_45_54_56]
EMDRNFLLY	|O00192|[635_640_657_659]
SPRQALTDF	|Q8WTW3|[222_229_230_230];|Q8WTW3|[222_228_229_230];|Q8WTW3|[222_227_228_230];|Q8WTW3|[222_226_227_230];|Q8WTW3|[222_225_226_230];|Q8WTW3|[222_224_225_230];|Q8WTW3|[222_223_224_230];|Q8WTW3|[204_204_223_230];|Q8WTW3|[214_214_223_230];|Q8WTW3|[221_221_223_230];|Q8WTW3|[222_222_223_230]
GPALGRSFI	|P32970|[78_85_98_98];|P32970|[78_85_103_103]
PAGPGRKEL	|Q13087|[468_474_452_453]
KPKAPPPSI	|Q9NZZ3|[9_16_21_21];|Q9NZZ3|[9_16_31_31];|Q9NZZ3|[9_16_35_35];|Q9NZZ3|[9_15_30_31]
SPASRAPHI	|Q02086|[386_393_405_405]
NPRVKAAAI	|O15269|[114_121_101_101]
APHLVGPHI	|Q96GK7|[34_41_53_53];|Q6P2I3|[34_41_53_53]
VAAPPRFKG	|O60500|[590_595_599_601]
RSLTGILGK	|Q16787|[3189_3195_3203_3204];|Q16787|[3189_3195_3213_3214]
PTSASRKSL	|Q5THJ4|[1742_1748_1724_1725]
RAAAPPLPR	|Q8IY37|[228_229_222_228];|Q8IY37|[228_228_221_228];|Q8IY37|[241_241_221_228];|Q8IY37|[249_249_221_228]
PSVAHRVAL	|Q9P281|[1539_1546_1518_1518];|Q9P281|[1539_1546_1537_1537];|Q9P281|[1539_1546_1548_1548];|Q9P281|[1539_1546_1557_1557];|Q9P281|[1539_1546_1561_1561]
HPKSVIVGI	|Q8IX04|[119_126_109_109];|Q8IX04|[119_126_124_124];|Q8IX04|[119_126_128_128];|Q8IX04|[119_126_132_132]
RGTAFTIGK	|Q14957|[621_623_596_601]
ARPRAPGLL	|Q8NBB4|[205_206_195_201]
PEAARRAAL	|Q6UXH1|[22_25_5_9]
PGREAVSKL	|P42684|[1160_1161_1137_1143]
RAAPPPPPR	|P16298|[8_15_8_8];|P16298|[8_15_25_25];|A6NFN3|[239_246_223_223];|A6NFN3|[239_246_228_228];|A6NFN3|[239_246_230_230];|A6NFN3|[239_246_232_232];|A6NFN3|[239_246_239_239];|Q9H0K1|[809_813_830_833];|Q9H0K1|[809_812_829_833];|Q9H0K1|[809_811_828_833];|Q96B36|[21_22_34_40];|O14511|[728_729_720_726];|Q96B36|[19_19_33_40];|Q96B36|[21_21_33_40];|Q96B36|[23_23_33_40];|Q96B36|[40_40_33_40];|Q96B36|[51_51_…
LRAGSVISR	|Q6ZW31|[176_177_197_203];|Q6ZW31|[182_183_197_203]
SPGKDPRLP	|A6NMT0|[318_321_302_306]
QPLAAKRAI	|Q6ZT21|[370_377_364_364];|Q6ZT21|[370_377_365_365];|Q6ZT21|[370_377_384_384];|Q6ZT21|[370_377_387_387];|Q6ZT21|[370_377_397_397]
RAHPALPPL	|Q9UMX2|[193_194_207_213]
RAPTVRLGL	|P55199|[409_409_420_427];|P55199|[424_424_420_427];|P55199|[438_438_420_427];|P55199|[445_445_420_427]
SRLPPVTSK	|O00515|[334_340_347_348]
SVRVAVEPK	|Q7Z2Z2|[600_600_618_625];|Q7Z2Z2|[603_603_618_625];|Q7Z2Z2|[628_628_618_625]
LAALALREK	|Q6UXG8|[269_274_284_286];|P42285|[177_178_176_182]
PADVRKTVT	|Q460N3|[406_407_383_389]
SRACPLVLK	|Q9UKP5|[1102_1104_1092_1097];|Q9H324|[1088_1090_1078_1083]
PSMEVGKKL	|Q9Y4G8|[323_324_310_316]
RASETALLK	|A6NJI9|[19_25_36_37];|P20648|[441_442_463_469];|P54707|[445_446_467_473];|P20648|[441_441_462_469];|P20648|[456_456_462_469];|P20648|[482_482_462_469];|P20648|[484_484_462_469];|P54707|[445_445_466_473];|P54707|[486_486_466_473];|P54707|[488_488_466_473];|P54707|[490_490_466_473]
RVAGILSFK	|O96005|[447_451_455_458]
PAHEPVKTL	|O60291|[75_76_78_84]
SPSLHKLVI	|P43897|[223_230_239_239];|P43897|[223_229_238_239];|P43897|[223_228_237_239]
IATLKHQIA	|Q9BXX3|[1118_1124_1111_1112];|Q9BXX3|[1118_1124_1118_1119]
RTGVPPTIR	|Q9Y5I2|[297_299_284_289]
GTRPPVTLR	|P57723|[121_122_99_105]
PLSRKVALL	|Q9Y4H2|[398_401_415_419]
NPALRKDAI	|Q9Y4F4|[192_199_202_202];|Q9Y4F4|[192_199_205_205];|Q9Y4F4|[192_199_219_219]
SPRKLPTSI	|Q9UIG0|[197_204_190_190];|Q9UIG0|[197_203_189_190]
GRTELAIKI	|Q9H269|[530_537_522_522];|Q9H269|[530_537_536_536];|Q02817|[925_929_919_922]
CLAPDIRSK	|Q5T7W7|[324_330_316_317]
GRTPLMISK	|Q8IWZ3|[601_606_621_623];|O75179|[630_635_650_652]
NHILPKPAI	|Q7Z5N4|[517_520_507_511]
QPPRVVVVI	|Q6J4K2|[413_416_392_396]
SPEVVRSKI	|Q5T200|[198_205_191_191];|Q5T200|[198_205_192_192];|Q5T200|[198_205_193_193]
QTALVEIIK	|Q9NSE4|[820_826_802_803];|Q9NSE4|[820_825_801_803]
KPILSTRSI	|O95456|[251_258_231_231];|O95456|[251_258_245_245];|O95456|[251_258_253_253];|O95456|[251_258_266_266];|O95456|[251_258_272_272];|P46952|[158_160_172_177]
QAHTAVFDK	|Q8WXD2|[185_188_166_170]
KISFPIIAK	|Q6ZRI8|[210_215_231_233]
GFQNALLVR	|P02768|[423_423_427_434];|P02768|[455_455_427_434]
LAMGIQTRK	|P43694|[308_310_314_319];|Q92908|[481_483_487_492]
FPAKGKLFI	|Q8TDD1|[415_422_404_404];|Q8TDD1|[415_422_411_411]
LPDNHKNAI	|Q8WWC4|[186_193_198_198];|Q8WWC4|[186_193_201_201];|Q8WWC4|[186_193_209_209];|Q8WWC4|[186_193_211_211]
PRSPLPRSI	|Q92610|[332_336_349_352];|Q9NPC8|[118_120_116_121]
PVRGRLLVL	|P54802|[389_390_375_381]
PVPRSKVEI	|Q8WZ74|[1614_1620_1640_1641]
PLSGLRRIL	|O75489|[203_206_184_188]
KPMEKLLGI	|Q9Y3D3|[85_92_73_73];|Q9Y3D3|[85_92_77_77];|Q9Y3D3|[85_92_104_104]
ISLGWKPTK	|Q8WZ42|[16648_16654_16644_16645]
LSRSDVLLK	|Q6P995|[34_38_19_22]
RSLATLNEK	|Q8WUW1|[44_45_47_53]
KTESPVPLY	|Q5VT06|[1908_1909_1929_1935]
IANVPLHNR	|Q6ZMI0|[255_256_240_246]
GIAENRHLQ	|Q9H8H3|[91_91_111_118];|Q9H8H3|[127_127_111_118];|Q9H8H3|[136_136_111_118]
VPRTERPAI	|Q9Y6J0|[1016_1023_1012_1012];|Q9Y6J0|[1016_1023_1015_1015];|Q9Y6J0|[1016_1023_1033_1033]
PRPKLLTDV	|H3BNL1|[177_182_167_169]
RILNPLVSK	|Q6NUP7|[170_170_173_180];|Q6NUP7|[190_190_173_180]
GKHTKLIML	|Q9NZJ4|[3952_3953_3958_3964]
GRLQLVNKI	|Q7Z7A1|[500_507_481_481];|Q7Z7A1|[500_507_486_486];|Q7Z7A1|[500_507_526_526];|Q7Z7A1|[500_506_485_486]
PLSSRKIEL	|Q14693|[295_301_277_278]
PSSLRKELL	|Q9BZE0|[307_312_327_329];|Q9NR97|[221_226_204_206];|Q4KMP7|[362_366_377_380]
RAPKQMSLL	|Q4AC94|[275_277_279_284]
RLFVGEPVK	|Q9BV57|[147_154_140_140];|Q9BV57|[147_154_144_144];|Q9BV57|[147_154_173_173];|Q9BV57|[147_153_172_173]
ALYTEAIKH	|Q2KHT3|[170_177_156_156];|Q2KHT3|[170_177_159_159];|Q2KHT3|[170_177_165_165];|Q2KHT3|[170_177_181_181]
PTHARIIEI	|P24043|[1281_1287_1303_1304]
KPESKYVSI	|P15260|[299_306_281_281];|P15260|[299_306_282_282];|P15260|[299_306_288_288];|P15260|[299_306_308_308];|P15260|[299_305_280_281]
GRLNYSTIK	|Q17RY0|[403_408_400_402]
PRLPLQKSL	|Q9BXD5|[281_287_302_303];|Q9BXD5|[281_286_301_303]
PRSARLLLE	|Q9P2Y4|[112_114_117_122]
IPRSMKVII	|Q9NXL9|[216_223_202_202];|Q9NXL9|[216_223_204_204];|Q9NXL9|[216_223_216_216];|Q9NXL9|[216_223_223_223];|Q9NXL9|[216_223_240_240];|Q9NXL9|[216_223_243_243]
RQSLIELAK	|Q15051|[411_416_431_433]
PAKLRVMFP	|O75911|[30_34_10_13]
RMLATLEVK	|P54886|[375_381_356_357];|P54886|[375_380_355_357]
GPRYVEVLK	|P62333|[76_80_59_62]
KPIELFSKT	|Q9NZ56|[1342_1344_1330_1335]
KLFNTGFLK	|Q7Z2T5|[522_522_535_542];|Q7Z2T5|[542_542_535_542];|Q7Z2T5|[561_561_535_542]
PRTDPKILK	|Q9UIW2|[875_876_862_868]
TRLVLDPVR	|Q9Y2R5|[31_37_28_29]
LVITRLLNK	|Q96JD6|[158_161_179_183]
APLLRKVYI	|Q5XPI4|[325_332_320_320];|Q5XPI4|[325_332_345_345]
ILYSHPTSR	|Q9UQ49|[345_345_330_337]
VQLNELKTE	|P35240|[526_526_538_545]
VPRTKVVYI	|Q9BTU6|[208_215_207_207];|Q9BTU6|[208_215_226_226]
IRSEIQMAK	|Q9H720|[621_622_636_642]
PRLEQGLLR	|O15287|[112_118_118_119];|O15287|[112_118_126_127]
QPKLPMRTI	|O43432|[658_665_639_639];|O43432|[658_665_648_648];|O43432|[658_665_656_656];|O43432|[658_665_670_670]
LRTITVVQR	|Q9NW64|[248_249_260_266];|Q9NW64|[239_239_259_266];|Q9NW64|[248_248_259_266]
EVYHTISLK	|Q96DT6|[194_197_175_179]
TRYPTPVQK	|O15523|[196_198_201_206];|O00571|[198_200_203_208]
RSKMLMLLV	|Q96KK3|[15_17_1_6]
KLQEFTAQK	|Q16566|[316_320_312_315]
RVLKLYSTI	|Q5JTH9|[793_795_771_776]
TRVNEFSLK	|O00339|[94_96_107_112]
AHKEIHQQL	|Q9P2W9|[118_123_112_114]
KDDDDTSFY	|Q9NUN5|[126_132_121_122]
LPYLPRPLH	|Q4KMQ1|[472_476_480_483]
SPMEEREKI	|Q96LB3|[300_307_292_292];|Q96LB3|[300_307_298_298];|Q96LB3|[300_307_312_312];|Q96LB3|[300_307_319_319]
KDDPIKELY	|O75592|[4450_4451_4454_4460]
LELDELNRH	|P78527|[2081_2083_2086_2091]
GTMCPHILR	|P60228|[228_228_248_255]
PRARGAGAL	|Q5VWX1|[245_250_231_233]
GRGPARLPA	|Q9Y5W3|[165_166_180_186]
VGAATRAPR	|Q9C029|[65_72_50_50];|Q9C029|[65_72_55_55];|Q9C029|[65_72_59_59];|Q9C029|[65_72_70_70];|Q9C029|[65_72_82_82];|Q9C029|[65_72_86_86];|Q9C029|[65_72_91_91]
GRLALAAAR	|Q86U86|[340_342_360_365]
RPRAPGPAP	|O75190|[285_291_272_273];|O75190|[285_291_288_289];|O76024|[40_46_18_19];|O76024|[40_46_43_44];|O76024|[40_46_59_60];|O76024|[40_45_17_19];|Q06587|[202_204_195_200]
GHKAVVVTL	|Q86UQ4|[3853_3858_3842_3844]
GVGKSHLAR	|Q9NXH8|[197_202_207_209]
PGGRLRDVA	|Q5UCC4|[116_117_96_102]
SRFAGAPSR	|Q8WZ74|[497_499_504_509]
RPRGPTPPA	|Q9NS67|[259_260_248_254];|Q3KQU3|[78_79_94_100];|Q3KQU3|[107_108_94_100]
RGVHPVTAL	|Q9BRL7|[205_208_183_187]
PGGTRRPVL	|Q2NKJ3|[397_398_415_421];|Q2NKJ3|[439_440_415_421];|Q2NKJ3|[397_397_414_421];|Q2NKJ3|[419_419_414_421];|Q2NKJ3|[423_423_414_421];|Q2NKJ3|[439_439_414_421]
PARGSGYHL	|Q8N531|[54_56_34_39];|Q8N531|[54_55_33_39]
RVSGLSSPR	|Q8WXI7|[115_115_123_130];|Q8WXI7|[130_130_123_130];|Q8WXI7|[132_132_123_130]
PRTARASTV	|P09848|[1345_1351_1329_1330]
RPPPPARAP	|Q8TF74|[310_316_295_296];|Q8TF74|[310_316_324_325];|Q9H6K5|[34_38_19_22];|M0QZC1|[159_163_137_140];|M0QZC1|[159_163_170_173]
RSADHAISL	|Q9Y520|[791_793_795_800]
RPGGRVSEL	|Q9BX10|[14_17_4_8]
RPGPPRPPP	|O00268|[104_108_127_130];|Q8N6N2|[43_46_20_24];|Q9BVN2|[414_416_398_403];|Q8N6N2|[43_45_19_24];|Q15427|[390_391_387_393];|Q15427|[405_406_387_393];|Q15427|[409_410_387_393]
RAAGFPVPR	|Q5SNV9|[1348_1353_1341_1343];|Q5SNV9|[1348_1352_1340_1343]
RSMAPPASR	|Q9Y6H1|[6_7_12_18];|Q5T1J5|[6_7_12_18]
RAFQGPGLK	|P21860|[1293_1299_1310_1311]
LPGSRRLAL	|P22303|[192_196_208_211]
NAAERRGPI	|P01903|[246_253_231_231];|P01903|[246_253_232_232];|P01903|[246_253_233_233];|P01903|[246_253_236_236];|P01903|[246_253_238_238];|P01903|[246_253_239_239]
PRSSLRAPT	|A4D2P6|[493_499_487_488];|Q9Y3L3|[606_607_612_618]
GRPSSLLVR	|Q8WZ71|[91_93_84_89]
SPRGEAQLK	|Q96T58|[1857_1863_1852_1853];|Q96T58|[1857_1863_1868_1869]
PRAEGRSTL	|Q15018|[281_282_290_296]
PSASRRSLI	|Q2NKX8|[1080_1081_1094_1100]
SPGTRRLSI	|P46020|[1025_1028_1015_1019]
GRFPSLVGR	|Q9BSK4|[556_561_550_552];|Q9BSK4|[556_561_555_557]
GARLQKLGF	|P62380|[80_82_88_93]
GRSSTFISH	|Q8NCK3|[122_126_145_148]
RGLAHKVVL	|Q6TDP4|[88_90_105_110]
RSIALKSGY	|Q14331|[128_129_107_113]
VGMLVGHKR	|P31629|[1605_1609_1600_1603]
RPSQPRGIS	|P13631|[369_373_387_390]
PRSVTGRLL	|Q13309|[166_168_151_156]
PRATTARLL	|Q9P107|[953_956_940_944]
RRVSAALLL	|Q5T230|[96_102_75_76];|Q5T230|[96_102_84_85];|Q5T230|[96_101_84_86];|Q5T230|[96_100_83_86]
VKRGLIDSL	|P53992|[1052_1053_1033_1039]
RPFGRSLLG	|P60008|[200_203_206_210]
GVRNCSLVR	|Q96EG3|[471_471_485_492];|Q96EG3|[481_481_485_492];|Q96EG3|[499_499_485_492];|Q96EG3|[506_506_485_492];|Q96EG3|[509_509_485_492]
RPSNVAHII	|Q6ZW49|[352_359_341_341];|Q6ZW49|[352_359_347_347];|Q6ZW49|[352_359_359_359]
GPRDHSVQI	|Q9NRL2|[874_881_871_871]
RLFGVKTMG	|Q99551|[56_61_81_83]
RPGSPRLLL	|Q96T83|[8_11_20_24]
PLRRGILAI	|O94979|[252_254_261_266]
HNIEGKLSL	|Q9Y263|[717_722_726_728]
QPRGPKSEL	|Q96F81|[1167_1167_1180_1187]
PSRERSPAI	|Q14814|[445_452_436_436];|Q14814|[445_452_438_438]
RGPSDLRVL	|O75074|[275_280_293_295]
RPLARVTSI	|Q7Z628|[93_100_105_105];|Q7Z628|[93_100_120_120]
QVPVHHPSL	|Q2VWA4|[880_881_857_863]
LGITQRRGL	|Q9UPA5|[2981_2986_3003_3005]
RPKPSSETL	|Q15366|[183_188_168_170]
GKLRQTEAL	|O00231|[273_275_282_287]
RVKAAQTEI	|Q5VIR6|[203_210_194_194];|Q5VIR6|[203_210_197_197];|Q5VIR6|[203_210_215_215]
RPHVAQPTI	|Q53H47|[591_598_584_584]
HPIRVVNAI	|Q5T2E6|[93_100_74_74];|Q5T2E6|[93_100_78_78];|Q5T2E6|[93_100_86_86];|Q5T2E6|[93_100_95_95];|Q5T2E6|[93_100_108_108]
RPRGPPIIL	|Q13308|[292_294_308_313];|Q13308|[292_293_307_313]
AAFRERASL	|Q96A98|[69_75_62_63]
RAHSPINIL	|O95785|[789_791_805_810]
RAALFRSSI	|Q9H490|[16_23_28_28]
RSNGSVFVR	|Q7L2E3|[1070_1071_1083_1089];|Q2M1Z3|[312_313_324_330];|Q7L2E3|[1064_1064_1082_1089];|Q7L2E3|[1068_1068_1082_1089];|Q7L2E3|[1070_1070_1082_1089];|Q7L2E3|[1072_1072_1082_1089];|Q7L2E3|[1089_1089_1082_1089];|Q7L2E3|[1110_1110_1082_1089]
GRLRIQPAI	|Q9Y603|[45_52_32_32];|Q9Y603|[45_52_40_40];|Q9Y603|[45_52_49_49]
PVSPRKVEL	|Q9HCH0|[761_765_770_773]
KRMGMSFGI	|Q14188|[316_323_308_308];|Q14188|[316_323_312_312]
LRPRTAVTL	|Q96R30|[261_264_247_251];|Q8NHB1|[261_264_247_251]
GRHGVFLEI	|Q13200|[299_306_281_281];|Q13200|[299_306_320_320];|Q13200|[299_305_319_320]
RTRALVQAI	|Q9NP80|[362_369_353_353];|Q9NP80|[362_369_354_354];|Q9NP80|[362_369_359_359];|Q9NP80|[362_369_380_380]
RRSSPLLTV	|Q9UQL6|[276_282_288_289]
GRFADSHEI	|Q9Y5Y5|[38_45_64_64]
SPKGRFVMI	|Q9Y3I1|[406_413_401_401];|Q9Y3I1|[406_413_422_422]
VVHVRNLLS	|Q9ULW3|[43_44_61_67]
STRHLQPSL	|Q9Y566|[1979_1984_2001_2003]
NPRIRANSI	|Q7L7V1|[367_374_347_347];|Q7L7V1|[367_374_356_356];|Q7L7V1|[367_374_370_370];|Q7L7V1|[367_374_380_380];|Q7L7V1|[367_374_387_387];|Q7L7V1|[367_374_391_391];|Q5SW79|[1204_1204_1199_1206];|Q5SW79|[1227_1227_1199_1206]
KPHTESLEI	|Q9BSJ8|[855_862_837_837];|Q9BSJ8|[855_862_853_853]
ERAAHPLLF	|Q8NHJ6|[158_165_153_153];|Q8NHJ6|[158_165_180_180]
KRTNIIPVI	|P22087|[206_213_201_201];|P22087|[206_213_210_210];|P22087|[206_213_211_211];|P22087|[206_213_214_214];|P22087|[206_213_227_227];|P22087|[206_213_233_233];|A6NHQ2|[218_225_222_222];|A6NHQ2|[218_225_223_223];|A6NHQ2|[218_225_239_239];|A6NHQ2|[218_225_245_245];|P22087|[206_212_213_214];|P22087|[206_212_232_233];|A6NHQ2|[218_224_244_245];|P22087|[206_211_212_214];|P22087|[206_210_211_214];|P22087|[…
PRRPTEAEV	|Q14767|[95_102_79_79];|Q14767|[95_102_85_85];|Q14767|[95_102_115_115]
KQRPESTPL	|Q96JA1|[1082_1084_1070_1075]
PQSRRSLVI	|Q8WZ42|[17111_17116_17108_17110]
KRVETLEAL	|Q96L14|[190_193_208_212];|Q5SW79|[1481_1484_1499_1503]
RPADRYGLI	|Q9BQG0|[21_28_42_42]
RSFQPGLTR	|O43548|[48_54_73_74]
PSTSRFRTL	|Q6PIJ6|[797_801_817_820]
GRINPYMSK	|P18621|[134_141_121_121];|P18621|[134_141_124_124];|P18621|[134_141_153_153];|P18621|[134_141_159_159]
KLFNGTFKL	|P86791|[146_152_146_147];|P86791|[146_152_162_163];|P86790|[146_152_146_147];|P86790|[146_152_162_163]
VPRRVLQSL	|Q9NQH7|[153_156_135_139];|P30281|[39_41_26_31]
RPFSPREAI	|Q86V48|[742_749_755_755];|Q86V48|[742_749_756_756];|Q86V48|[742_749_760_760];|Q86V48|[742_749_768_768];|Q86V48|[742_748_754_755]
RRPISAIIF	|O75815|[238_242_247_250]
DKLRTSFIT	|Q96DT5|[2359_2365_2368_2369]
PNENRKESL	|Q15022|[419_423_403_406]
SRFPEALLR	|Q13200|[260_266_249_250];|Q13200|[260_266_266_267];|Q13200|[260_265_248_250];|Q13200|[260_264_247_250]
RSKSQNILF	|Q6NT16|[435_442_425_425];|Q6NT16|[435_441_424_425]
SVRELNFTK	|Q9Y5Q3|[220_225_231_233]
LQRPDHESL	|O43196|[88_90_80_85]
RPQIHGYDI	|Q6IA86|[433_440_431_431];|Q6IA86|[433_440_436_436];|Q6IA86|[433_440_447_447]
RPLYKNVVI	|Q9P1U1|[313_320_296_296];|Q9P1U1|[313_320_304_304];|Q9P1U1|[313_320_309_309];|Q9P1U1|[313_319_303_304]
KRFQPDLSI	|Q9HBI0|[148_155_131_131];|Q9HBI0|[148_155_165_165];|Q9HBI0|[148_155_167_167];|Q9HBI0|[148_154_130_131]
VPRNSYVLR	|Q14573|[381_387_389_390];|Q14643|[382_388_375_376];|Q14643|[382_388_390_391];|Q14571|[381_387_389_390]
HSEVQTLKY	|Q8IX90|[48_55_39_39];|Q8IX90|[48_55_45_45]
CQRSLEQKI	|P49454|[373_375_384_389]
IPRDKSLYL	|Q96NM4|[473_473_480_487]
RLSSYIRVI	|Q7Z7L7|[257_261_239_242]
GRVLFIKDY	|Q9H3F6|[198_205_217_217];|Q13829|[195_202_214_214]
RRLQLIIAQ	|Q9ULE0|[291_292_284_290]
SRFLKSDIF	|O43665|[136_142_126_127]
SRKEFEPIL	|O15357|[624_630_619_620]
IRYPDSHQI	|Q9UN86|[325_332_324_324];|Q9UN86|[325_332_325_325];|Q9UN86|[325_332_342_342]
LRDSHIFQI	|Q63HN8|[1227_1234_1224_1224];|Q63HN8|[1227_1234_1232_1232]
RVDGRMLQY	|Q86W92|[744_750_735_736]
RRTEIIEDI	|Q9Y5L0|[165_172_146_146];|Q9Y5L0|[165_172_161_161];|Q9Y5L0|[165_172_169_169];|Q9Y5L0|[165_172_170_170]
VPRRSFFEI	|Q9UHB4|[308_315_305_305]
RPLEDREQI	|Q9Y4H4|[99_106_111_111]
TWAQKLYEK	|Q9Y4I1|[522_528_539_540]
RTTIYQFHY	|Q9Y2R2|[172_173_184_190];|Q9Y2R2|[183_184_184_190]
RPNDSRMLV	|Q9UJX2|[429_436_437_437];|Q9UJX2|[429_436_450_450];|Q9UJX2|[429_435_436_437];|Q9UJX2|[429_435_449_450];|Q9UJX2|[429_434_435_437];|Q9UJX2|[429_433_434_437];|Q9UJX2|[429_432_433_437];|Q9UJX2|[429_431_432_437];|Q9UJX2|[429_430_431_437];|Q9UJX2|[423_423_430_437];|Q9UJX2|[424_424_430_437];|Q9UJX2|[429_429_430_437];|Q9UJX2|[434_434_430_437];|Q9UJX2|[458_458_430_437]
RRGSIGVGI	|Q9H1V8|[125_131_110_111];|Q9H1V8|[125_131_141_142];|Q9H2J7|[126_132_111_112];|Q9H2J7|[126_132_142_143]
PRPRGGSDL	|Q6NW40|[400_401_416_422];|Q6NW40|[416_417_416_422]
RPRWGAAAS	|Q86W56|[13_19_25_26];|Q86W56|[13_18_24_26]
PRPRAWGAA	|O75077|[62_63_62_68];|O75077|[42_42_61_68];|O75077|[43_43_61_68];|O75077|[54_54_61_68];|O75077|[55_55_61_68];|O75077|[62_62_61_68];|O75077|[70_70_61_68];|O75077|[73_73_61_68]
TSKTAFKSI	|Q8WZ42|[33726_33729_33737_33741]
RGPSSLRVL	|Q15393|[429_431_433_438]
PRDSRSCGL	|A2VEC9|[2538_2540_2513_2518]
NALDPNPPR	|Q7Z5R6|[57_59_35_40]
RVRASLSDI	|Q969K3|[250_257_275_275]
PLIKPDIAR	|Q9HBM6|[105_109_94_97];|Q16594|[105_109_94_97]
RGDWARLPG	|Q8IXQ3|[133_136_115_119]
TKSLLHFGK	|Q17RW2|[19_25_11_12]
KRPLLAVKL	|Q96J01|[318_323_342_344]
RSGRSIESF	|Q5K651|[1562_1568_1571_1572]
KRFSQSSSI	|O60304|[388_395_398_398]
RSLKVARPL	|Q92953|[713_717_734_737]
PLRCTRALL	|Q96S19|[115_119_133_136]
RRGDFIPAL	|P0C874|[418_422_408_411];|Q6ZUB0|[418_422_408_411]
RRSSDIISI	|Q9UJX6|[496_503_501_501];|Q9UJX6|[496_503_502_502];|Q9UJX6|[496_503_508_508];|Q9UJX6|[496_503_516_516];|Q9UJX6|[496_502_507_508]
VHVVISKRL	|Q8WUY3|[21_25_15_18]
QVRGCLLKH	|Q8IX18|[133_135_152_157]
RRSGLNQNI	|Q8NF91|[6577_6584_6573_6573];|Q8NF91|[6577_6584_6574_6574]
QFLKLPGKK	|Q9Y5W8|[626_627_634_640]
NPNLRKNVI	|P23193|[203_210_195_195];|P23193|[203_210_215_215]
PRSLWGRSL	|P81408|[613_619_615_616];|P81408|[613_619_624_625];|P81408|[613_619_638_639];|P81408|[613_618_614_616]
RRDSALQQI	|Q6P2H3|[620_627_643_643]
IVYKNTHIK	|Q8IXQ6|[217_218_226_232]
VFTTLHIHR	|Q96F25|[119_124_102_104];|Q96F25|[119_124_133_135]
RRIDVINVF	|Q96S94|[139_141_143_148];|Q9UK58|[144_146_148_153]
RRTELLEDL	|Q8NAN2|[594_599_586_588]
RRYQEQLGI	|Q8N4T4|[35_42_51_51];|Q8N4T4|[35_41_50_51];|Q8N4T4|[35_40_49_51]
GRYDRYIFS	|Q9Y4J8|[165_168_149_153]
RPHIGASHL	|Q9H0E3|[250_251_224_230]
RVRSHLAAI	|P35613|[317_324_313_313];|P35613|[317_324_314_314];|P35613|[317_324_331_331];|P35613|[317_324_341_341];|P35613|[317_324_342_342];|P35613|[317_324_344_344];|P35613|[317_323_312_313];|Q9Y639|[332_338_321_322]
PLKVEPLAR	|Q8NDT2|[211_216_201_203]
GVRRAVTLR	|Q8N594|[91_92_72_78]
KIRGIVSEK	|Q02224|[1724_1725_1741_1747];|Q02224|[1821_1822_1794_1800]
RARGKIILL	|Q9UKN7|[1935_1938_1928_1932]
LNLRSVAIR	|Q6IE36|[93_95_99_104];|Q6IE37|[89_91_95_100]
ITHNSKHVL	|Q9P2H0|[833_837_841_844];|Q9P2H0|[833_836_840_844];|Q9P2H0|[833_835_839_844]
RSLAVTLHR	|Q8TB36|[257_257_250_257];|Q8TB36|[265_265_250_257];|Q8TB36|[266_266_250_257];|Q8TB36|[273_273_250_257]
RSLDPKLAR	|Q7Z695|[602_608_614_615]
RAKRSSLLQ	|Q5EBL2|[118_119_102_108]
LPRKHIQGI	|P41214|[566_573_548_548];|P41214|[566_573_571_571]
LKFKTGLQK	|P42226|[128_134_152_153];|P42226|[128_133_151_153]
KLFSRSSLK	|Q5TEA3|[679_682_692_696]
KRLDIATHI	|Q9P260|[1105_1112_1087_1087];|Q9P260|[1105_1112_1101_1101];|Q9P260|[1105_1112_1109_1109];|Q9P260|[1105_1112_1125_1125]
RPLGQRARI	|Q5JUQ0|[223_230_204_204];|Q5JUQ0|[223_230_205_205];|Q5JUQ0|[223_230_217_217];|Q5JUQ0|[223_230_235_235];|Q5JUQ0|[223_230_242_242];|Q5JUQ0|[223_230_249_249]
GRITKRLLI	|Q9BV86|[73_80_72_72];|Q9BV86|[73_80_75_75];|Q9BV86|[73_80_92_92]
RKFEAVTAR	|Q86Y38|[598_603_590_592]
HPLPRLKAF	|O95672|[698_704_714_715]
KPREKVLVL	|Q8N6R0|[47_54_36_36];|Q8N6R0|[47_54_38_38];|Q8N6R0|[47_54_42_42];|Q8N6R0|[47_54_53_53];|Q8N6R0|[47_54_62_62];|Q8N6R0|[47_54_66_66];|Q8N6R0|[47_53_41_42];|Q8N6R0|[47_53_52_53]
RPKAKEIQI	|Q9Y2H6|[673_680_679_679];|Q9Y2H6|[673_680_694_694]
KVRVPRQSI	|O15254|[265_272_247_247]
RTLRSIALR	|Q8WXX0|[3653_3658_3632_3634]
RGRGVYLIR	|Q6EMB2|[186_193_174_174];|Q6EMB2|[186_193_186_186];|Q6EMB2|[186_193_188_188];|Q6EMB2|[186_193_209_209]
MPKKGLRYT	|Q8IVL0|[1401_1401_1422_1429];|Q8IVL0|[1414_1414_1422_1429]
RPRVRVEAI	|Q9Y697|[273_280_254_254];|Q9Y697|[273_280_259_259];|Q9Y697|[273_280_268_268];|Q9Y697|[273_280_270_270];|Q9Y697|[273_279_267_268]
LPKDRLIKI	|Q8IY45|[32_33_37_43]
PYNARRAHL	|Q9NZD8|[257_258_244_250]
RRSQALEKI	|Q9H3U1|[97_104_85_85]
LRMKQIASR	|Q2KJY2|[799_802_793_797]
LRSITHLNR	|Q9NRD9|[1487_1492_1479_1481];|Q9NRD8|[1484_1489_1476_1478]
IPRKTRLLL	|Q96PX9|[246_249_237_241]
RRGELLVLR	|Q12770|[749_753_770_773]
GKLLEERLR	|Q99784|[228_230_214_219];|Q9UPE1|[261_263_282_287];|Q9UPE1|[261_262_281_287]
SRLTKFHNI	|Q96EK7|[832_839_855_855]
RGFEKKVPR	|Q8N128|[37_40_51_55]
SRFARLQKI	|P04035|[626_633_618_618];|P04035|[626_633_638_638];|P04035|[626_633_645_645]
RQHEIVLKP	|Q8WUM0|[780_787_760_760];|Q8WUM0|[780_787_764_764];|Q8WUM0|[780_787_771_771];|Q8WUM0|[780_787_791_791]
RARQVLEHI	|Q96H20|[208_215_198_198]
PEKEQRKTL	|Q8N715|[325_326_316_322];|Q8N715|[325_325_315_322];|Q8N715|[340_340_315_322];|Q8N715|[341_341_315_322]
TSYKEKAFR	|O43309|[568_572_560_563]
ARFLRRQAL	|P43007|[32_33_38_44]
ISKKYIMEK	|Q6ZMT9|[145_150_168_170];|Q6ZMT9|[145_149_167_170]
RRLETLLIK	|O95816|[172_178_170_171];|O95816|[172_178_188_189]
RTTSHLLYR	|Q03164|[1655_1661_1663_1664]
RRKEVVVYI	|P52948|[795_802_775_775];|P52948|[795_802_791_791];|P52948|[795_802_794_794]
RESFMKPNR	|Q8IZF0|[659_664_638_640]
KVREEFKEI	|P02545|[108_115_128_128]
PTAHAFVSR	|P49327|[1527_1534_1507_1507];|P49327|[1527_1534_1515_1515];|P49327|[1527_1534_1538_1538];|P49327|[1527_1534_1545_1545];|P49327|[1527_1534_1552_1552]
RRAVAKVSI	|O14492|[226_230_248_251]
KRKGFSEGI	|P51858|[78_85_89_89]
RRNKGPVSL	|Q15459|[699_706_685_685];|Q15459|[699_706_691_691];|Q15459|[699_706_698_698];|Q15459|[699_706_722_722];|Q15459|[699_706_727_727];|Q15459|[699_705_690_691]
RRRPLVAGL	|P32970|[11_14_26_30];|P32970|[11_13_25_30]
RIRSRGLAL	|Q8NES3|[284_286_262_267]
RRHGSMVSI	|Q9Y5P4|[128_135_109_109];|Q9Y5P4|[128_135_112_112]
GRHSLDHLI	|Q01780|[399_406_426_426]
RPTSKRDSI	|P35251|[530_537_517_517];|P35251|[530_537_542_542]
SRLSQARRT	|Q8IYB8|[697_700_706_710];|Q8IYB8|[697_699_705_710]
KRNPKAFAF	|Q14692|[39_46_45_45];|Q14692|[39_46_57_57];|Q14692|[39_45_44_45]
KRHNLAIDI	|Q9UPT9|[97_104_90_90];|Q9UPT9|[97_104_103_103];|Q9UPT9|[97_104_110_110];|Q9UPT9|[97_104_119_119]
RRARANPQI	|Q9BQE5|[228_235_220_220];|Q9BQE5|[228_235_224_224];|Q9BQE5|[228_235_227_227];|Q9BQE5|[228_235_245_245];|Q9BQE5|[228_235_246_246];|Q9BQE5|[228_235_249_249]
RKFDGTVIR	|Q8N1V2|[524_525_532_538]
KRFGKAYNI	|Q86XP3|[347_354_328_328];|Q86XP3|[347_354_331_331];|Q86XP3|[347_354_342_342]
GGFRYRSTR	|Q6UX52|[248_251_236_240]
RRGELRLSL	|Q9NRF2|[560_563_577_581];|Q9UQQ2|[397_400_414_418]
RRKEIMLGI	|Q06210|[520_527_515_515];|Q06210|[520_527_524_524];|Q06210|[520_527_535_535];|Q06210|[520_527_545_545]
RRFANKVLL	|Q8NB66|[1763_1766_1770_1774]
RRRSSTFTI	|Q9C0G0|[428_435_420_420];|Q9C0G0|[428_435_449_449]
RIREGQTLR	|O00165|[139_140_120_126]
RRVEGVFRL	|Q96Q15|[2404_2405_2388_2394]
KRKGYSYEI	|P52735|[438_445_417_417];|P52735|[438_445_435_435];|P52735|[438_445_449_449];|P52735|[438_445_450_450];|P52735|[438_444_448_449]
RRKGQVWTI	|Q9H1H9|[734_737_741_745]
RRFQDAVLR	|Q01813|[374_380_382_383]
RRKQYPISI	|O15523|[260_267_240_240];|O15523|[260_267_266_266];|O15523|[260_267_280_280];|O00571|[262_269_242_242];|O00571|[262_269_268_268];|O00571|[262_269_282_282]
YRKAFESRI	|Q9BRQ8|[252_259_240_240];|Q9BRQ8|[252_259_245_245];|Q9BRQ8|[252_259_247_247]
KRYSRALYI	|Q9UJX3|[353_360_334_334];|Q9UJX3|[353_360_366_366]
RIRRENQVL	|Q10589|[147_148_138_144]
RRNMERLTI	|P40227|[318_325_297_297];|P40227|[318_325_310_310]
RNYEKVVQR	|O43581|[231_232_211_217]
RQFNIHNNR	|Q96KR1|[1024_1025_1042_1048]
RRMAEEFLR	|P24928|[1052_1058_1045_1046]
RRKQLQNYI	|Q8TEQ0|[734_741_723_723];|Q8TEQ0|[734_741_750_750]
LTGPGRLAR	|Q9HAH7|[384_388_370_373]
KRLSVLRAR	|Q96BT1|[177_181_170_173]
KRFEHSAKI	|Q9UPT9|[410_417_403_403];|Q9UPT9|[410_417_422_422];|A6NNY8|[311_318_323_323];|A6NNY8|[311_318_327_327];|Q9UPT9|[410_416_421_422];|A6NNY8|[311_317_322_323]
KRKAYEPKI	|Q6KC79|[1180_1187_1206_1206]
RHIDLKLNK	|Q9HAF1|[176_177_179_185]
ARKKRNFII	|Q00839|[571_578_567_567];|Q00839|[571_578_569_569];|Q00839|[571_578_578_578]
KRNRLKLIL	|Q00610|[851_857_833_834];|Q00610|[851_856_832_834]
KRLDKLFKE	|Q70Z53|[129_131_137_142]
KRYSDFKKI	|Q96S38|[52_59_48_48];|Q96S38|[52_59_49_49];|Q96S38|[52_59_67_67]
RRKLIYEKI	|P18124|[46_53_30_30];|P18124|[46_53_50_50];|P18124|[46_53_69_69];|P18124|[46_52_29_30]
KRYKSIVKY	|P14324|[257_264_259_259];|P14324|[257_264_265_265];|P14324|[257_264_270_270];|P14324|[257_264_273_273];|P14324|[257_264_281_281];|P14324|[257_263_264_265];|P14324|[257_262_263_265];|P14324|[257_261_262_265];|P14324|[257_260_261_265];|P14324|[257_259_260_265];|P14324|[257_258_259_265];|P14324|[257_257_258_265];|P14324|[260_260_258_265];|P14324|[264_264_258_265];|P14324|[266_266_258_265]
PGGDVSGLKP	|Q7Z7J7|[227_233_209_211]
VAGDIPTGVV	|Q9H2B4|[319_326_300_301]
PACGAAKILV	|P20132|[268_273_263_266]
PPRPAASAAL	|Q13219|[37_42_14_17]
SPAGCTIGLH	|Q7Z408|[1285_1286_1306_1313]
PGAALSRLAL	|Q9UK80|[164_165_137_144];|Q9UK80|[121_121_136_144];|Q9UK80|[146_146_136_144];|Q9UK80|[148_148_136_144];|Q9UK80|[149_149_136_144];|Q9UK80|[164_164_136_144]
ATLSLSGCPK	|Q9NYF0|[199_204_206_209]
PKASSGSFSL	|Q9C0D2|[2357_2358_2373_2380]
SPNSAHAVSI	|O14511|[622_630_620_620];|O14511|[622_630_637_637]
GAPRTPSPLV	|P33241|[156_157_173_180];|P33241|[159_160_173_180]
KPVLDAGPVI	|P28908|[379_387_366_366];|P28908|[379_387_392_392];|P28908|[379_386_391_392]
PRSPLPGSSL	|Q8NCE2|[537_539_543_549]
PSAPPDVARL	|O94763|[15_18_28_33]
PRAPALTVPT	|Q96JP9|[789_794_810_813]
LHLKGGTNAI	|O00442|[119_127_133_133];|O00442|[119_127_143_143]
APKETDCVGI	|P51003|[30_37_21_22]
PRGTSPLVTL	|P62683|[178_184_191_193];|P62685|[178_184_191_193];|P62684|[178_184_191_193];|P63126|[178_184_191_193];|P63145|[178_184_191_193];|Q7LDI9|[178_184_191_193];|P63128|[178_184_191_193]
TPTIPHCSMG	|Q9Y3D0|[87_95_100_100]
LSGCTALLNR	|P49915|[243_245_252_258]
KPTTVTECLG	|Q86SE9|[27_35_23_23]
LSRPGSTSLM	|P15923|[475_478_454_459]
HVANLQLSGL	|Q8IWT3|[680_682_696_702]
QPKGPDPDSI	|Q96II8|[392_400_375_375];|Q96II8|[392_400_378_378];|Q96II8|[392_400_409_409];|Q96II8|[392_400_414_414]
GLELSGCIVY	|Q9H3T2|[493_496_508_513]
TPRISPATTL	|Q8IVW6|[373_373_378_386];|Q8IVW6|[375_375_378_386];|Q8IVW6|[384_384_378_386];|Q8IVW6|[385_385_378_386];|Q8IVW6|[395_395_378_386];|Q8IVW6|[396_396_378_386]
GATCELPLQK	|Q8IXW5|[275_275_286_294]
QALQEAGCLK	|Q9Y240|[158_163_176_179]
VQPGVVTTPY	|Q9BX46|[128_133_146_149]
LTTSVSLPPR	|Q6DN03|[159_163_140_144]
APRTVSVQTI	|Q92750|[387_395_380_380];|Q92750|[387_395_381_381]
VHLSPKDTAL	|Q6ZN18|[475_478_481_486]
VVYVIDSCKG	|Q08211|[725_733_705_705]
LPRAVNTQAI	|O60749|[267_275_281_281]
HAAELGFRAL	|Q9Y2E5|[312_317_329_332]
MPSASRVIII	|Q8IWT3|[1255_1262_1273_1274];|Q14999|[926_933_944_945]
RMAPPLLGLQ	|Q9GZV8|[72_78_83_85];|Q9GZV8|[72_77_82_85]
HINLRSAVSI	|Q8N5C6|[676_677_651_658]
GGTDFYQTSY	|Q969M3|[29_30_9_16];|Q969M3|[32_33_9_16]
DKDGCMVEQY	|P42892|[621_624_644_649]
LAGTEYNEQY	|Q5VTH9|[677_681_692_696]
SPYFQRPLAI	|P32929|[192_200_175_175];|P32929|[192_200_182_182];|P32929|[192_200_183_183];|P32929|[192_200_205_205]
PQRGAGVAGL	|Q96RQ9|[59_61_66_72]
LPRGGSGSVI	|Q9NZ09|[200_208_183_183];|Q9NZ09|[200_208_191_191]
RPTPGVASVL	|Q86UU0|[1315_1318_1300_1305];|Q86UU0|[1315_1317_1299_1305]
GRAPMSLASL	|Q8NF50|[1560_1563_1553_1558]
PGGRCLLADL	|Q14004|[656_658_643_649]
GVPSLPFTSL	|P31785|[20_21_4_11]
RPSGSWNGAI	|Q02487|[5_13_24_24];|Q02487|[5_13_26_26];|Q02487|[5_12_23_24]
AVFWGAGLVK	|P06331|[43_45_27_33]
NRFAGFGIGI	|Q96AG3|[98_106_105_105];|Q96AG3|[98_106_121_121];|Q96AG3|[98_105_104_105]
GLRSMTPISI	|Q04726|[336_340_359_363]
RAPTVISLSF	|Q9C075|[30_34_43_47]
GGRCVYITPM	|O75643|[1353_1353_1374_1382];|O75643|[1355_1355_1374_1382];|O75643|[1374_1374_1374_1382]
GARTVITEEF	|Q96I24|[69_70_75_82]
NPRDLPLMAI	|P04818|[183_191_165_165];|P04818|[183_191_168_168];|P04818|[183_191_177_177];|P04818|[183_191_178_178]
KEVTICGDLY	|O14829|[165_173_185_185]
IPRENAQISI	|Q9Y275|[263_271_250_250];|Q9Y275|[263_271_263_263];|Q9Y275|[263_271_270_270]
SPRQALTDFI	|Q8WTW3|[222_230_215_215];|Q8WTW3|[222_230_238_238];|Q8WTW3|[222_230_251_251]
GYTCPFVEKF	|O00562|[119_119_99_107];|O00562|[120_120_99_107]
APRNGSGVAL	|Q7L9B9|[549_557_535_535];|Q7L9B9|[549_557_558_558];|Q7L9B9|[549_556_557_558];|Q7L9B9|[549_555_556_558];|Q7L9B9|[549_554_555_558];|Q7L9B9|[549_553_554_558];|Q7L9B9|[549_552_553_558];|Q7L9B9|[549_551_552_558];|Q7L9B9|[549_550_551_558];|Q7L9B9|[536_536_550_558];|Q7L9B9|[549_549_550_558];|Q7L9B9|[557_557_550_558];|Q7L9B9|[563_563_550_558]
ALAGGRPGIR	|Q9GZV7|[244_247_219_224]
AILRVGGVGK	|Q8NGS0|[222_226_230_234]
GRPTAPPRGP	|Q7Z7M0|[606_607_621_628]
VPRGPKVGSI	|Q08378|[217_225_243_243]
IPSGSHKVSI	|O14788|[175_183_170_170];|O14788|[175_183_175_175];|O14788|[175_183_196_196]
GRPCAKPSVL	|Q5T1R4|[190_190_199_207];|Q5T1R4|[216_216_199_207];|Q5T1R4|[223_223_199_207];|Q5T1R4|[226_226_199_207]
SPVSTKHCAV	|Q13216|[150_157_160_161]
IPSAHRVSGL	|P23258|[349_350_369_376];|Q9NRH3|[349_350_369_376];|P23258|[349_349_368_376];|P23258|[356_356_368_376];|P23258|[384_384_368_376];|Q9NRH3|[349_349_368_376];|Q9NRH3|[356_356_368_376];|Q9NRH3|[384_384_368_376]
PSRRPGAPSL	|Q5QP82|[35_36_55_62];|Q5QP82|[60_61_55_62]
LPIKANTKAS	|Q12955|[3865_3869_3883_3887]
GRSGALLLQK	|O00468|[371_375_379_383]
PKSDVLGSKI	|Q9NVC6|[605_610_589_592]
RGTHVPGLVL	|O43184|[616_620_629_633]
PRAAGPDPRL	|P30281|[13_15_15_21];|P30281|[40_42_15_21]
ARTSGGYVKL	|Q53LP3|[336_342_357_359]
GPRPSPTRSV	|Q8NHJ6|[237_238_225_232];|Q8NHJ6|[219_219_224_232];|Q8NHJ6|[237_237_224_232];|Q8NHJ6|[247_247_224_232];|Q8NHJ6|[253_253_224_232]
GARCSLVNVH	|Q96AZ6|[35_36_27_34];|Q96AZ6|[16_16_26_34];|Q96AZ6|[18_18_26_34];|Q96AZ6|[24_24_26_34];|Q96AZ6|[35_35_26_34];|Q96AZ6|[47_47_26_34]
RGPSRASLVI	|Q8N2C7|[307_310_313_318];|Q8N2C7|[307_309_312_318]
PARSRSAVTL	|Q3KQU3|[303_303_309_317];|Q3KQU3|[318_318_309_317];|Q3KQU3|[330_330_309_317];|Q3KQU3|[334_334_309_317]
RGLIDGVVKT	|P14866|[107_114_97_98]
LNDRGGSVIK	|P51956|[416_417_390_397]
GALDCAIRLK	|Q5UE93|[131_131_116_124]
GRTCGEVIVK	|Q9Y2X9|[368_368_365_373];|Q9Y2X9|[374_374_365_373];|Q9Y2X9|[381_381_365_373];|Q9Y2X9|[389_389_365_373]
GAVYRGALQK	|P20591|[540_541_537_544];|P20591|[562_563_537_544]
APRIALHTAI	|Q9UBD5|[594_602_597_597];|Q9UBD5|[594_602_622_622]
LSVHRKAAAL	|Q13470|[600_603_576_581]
GKKCPFIVAL	|O60841|[732_732_747_755]
RPDPAGHLTI	|Q9NTJ4|[1005_1013_998_998]
RIGDGPIILK	|Q15262|[331_331_318_326];|O14522|[328_328_315_323]
PLRAAAERIS	|O94766|[36_42_50_52]
GTLCKPLVPR	|Q9UHH9|[27_27_39_47];|Q9UHH9|[28_28_39_47];|Q9UHH9|[68_68_39_47]
RPLIKNACGL	|P43694|[252_256_239_243];|Q92908|[425_429_412_416];|P23771|[298_302_285_289];|P23769|[330_334_317_321]
KPSLSGARRL	|Q86UW9|[249_256_260_261]
KPQFTALVGK	|P11277|[1343_1350_1336_1337]
KPTFSRATAI	|Q96DU3|[319_327_306_306];|Q96DU3|[319_327_308_308];|Q96DU3|[319_327_312_312]
GALHLLPSQR	|O15234|[57_61_48_52]
VHQVRAAISL	|Q8N5I2|[108_115_127_128]
LPRSKIICGL	|P51684|[161_168_173_174]
GRSCSLVLEH	|Q14318|[313_313_293_301];|Q14318|[320_320_293_301]
LPINSRKCLG	|P49755|[36_44_25_25];|P49755|[36_44_56_56];|P49755|[36_44_65_65];|P49755|[36_43_24_25]
SPRSSDLVKI	|Q9NVH2|[338_346_322_322];|Q9NVH2|[338_346_324_324];|Q9NVH2|[338_346_330_330];|Q9NVH2|[338_346_359_359]
KIFTTSGNLK	|Q13105|[466_467_483_490]
RPLPRQGATI	|Q7Z591|[329_337_312_312];|Q7Z591|[329_337_315_315]
KVNIIPLIAK	|Q6ZU15|[186_194_173_173];|Q6ZU15|[186_194_181_181];|Q6ZU15|[186_194_186_186];|Q6ZU15|[186_194_195_195];|Q6ZU15|[186_194_201_201];|Q6ZU15|[186_194_208_208];|Q6ZU15|[186_194_210_210];|Q16181|[186_194_173_173];|Q16181|[186_194_181_181];|Q16181|[186_194_186_186];|Q16181|[186_194_195_195];|Q16181|[186_194_208_208];|Q16181|[186_194_209_209];|Q16181|[186_194_213_213];|Q6ZU15|[186_193_194_195];|Q16181|[…
GKPCDLPLRL	|O00425|[212_213_193_200];|O00425|[173_173_192_200];|O00425|[175_175_192_200];|O00425|[178_178_192_200];|O00425|[183_183_192_200];|O00425|[186_186_192_200];|O00425|[208_208_192_200];|O00425|[212_212_192_200];|O00425|[215_215_192_200]
KGTQDPRVTI	|Q58EX2|[509_512_522_527]
RPPGLPLPRL	|P48634|[1446_1453_1464_1465]
GAACSKFFYK	|P52739|[42_42_53_61];|P52739|[76_76_53_61]
PGPDSPRREL	|Q8IVL5|[38_40_28_34];|Q8IVL5|[38_39_27_34]
PSDQKKIISL	|Q96HH9|[52_53_60_67]
APFDRRATSI	|Q92466|[108_116_103_103];|Q92466|[108_116_136_136]
APRSVMKSFL	|Q9NQS7|[511_519_492_492];|Q9NQS7|[511_519_496_496];|Q9NQS7|[511_519_505_505];|Q9NQS7|[511_519_526_526];|Q9NQS7|[511_518_495_496]
GVVCEYIVKK	|P41091|[213_213_234_242];|P41091|[218_218_234_242];|Q2VIR3|[213_213_234_242];|Q2VIR3|[218_218_234_242]
LHLETPLVVK	|Q8WYP5|[1170_1172_1174_1180];|Q8WYP5|[1170_1171_1173_1180]
RPPSFTPHTL	|O75081|[93_101_110_110];|O75081|[93_101_119_119];|O75081|[93_100_109_110]
RPQSSRPVLI	|Q8IWB7|[8_16_5_5];|Q8IWB7|[8_16_20_20];|Q8IWB7|[8_16_33_33];|Q8IWB7|[8_15_32_33]
RSSMQQGNVF	|Q8IXB3|[131_139_113_113]
SPDLKVRPEI	|Q9UPZ3|[563_571_557_557]
KPIDVSRLDI	|Q12904|[148_156_127_127];|Q12904|[148_156_141_141];|Q12904|[148_156_150_150];|Q12904|[148_156_159_159];|Q12904|[148_156_162_162];|Q12904|[148_156_163_163]
RLLFSTLTSK	|Q9BW62|[290_293_275_280];|O75449|[291_294_276_281]
ISRIDPIRSL	|Q8N4A0|[298_306_282_282];|Q8N4A0|[298_306_313_313];|Q8N4A0|[298_306_324_324]
RPDGFLLVRL	|Q86V86|[115_122_108_109]
LPHPVHFLLL	|Q969E3|[22_24_4_10]
GTMCPHILRY	|P60228|[228_228_248_256]
LIYFQAASRK	|Q92729|[703_710_699_700];|Q92729|[703_710_725_726]
EKLDNLPQKL	|Q9NU02|[645_651_657_659]
LTESNMKSRY	|P30291|[274_274_287_295];|P30291|[302_302_287_295]
LRFQEPTEPK	|P31350|[73_74_52_59]
LPRDNKAAAL	|O95273|[149_149_166_174];|O95273|[174_174_166_174];|O95273|[175_175_166_174];|O95273|[177_177_166_174]
GKLCNIFSTK	|P11388|[160_160_168_176];|P11388|[161_161_168_176];|P11388|[164_164_168_176];|P11388|[166_166_168_176];|Q02880|[181_181_189_197];|Q02880|[182_182_189_197];|Q02880|[185_185_189_197];|Q02880|[187_187_189_197]
GRVCDIILPR	|Q8NAV1|[137_137_156_164]
GVGVGVGPRR	|Q8NE35|[273_279_268_270]
PGAGSRSGRL	|Q86U90|[43_45_26_32];|Q86U90|[43_44_25_32];|Q86U90|[51_52_25_32]
GAHRPVGLAL	|Q14142|[51_54_57_62]
SKSSSGILTL	|Q86VR7|[41_45_18_22]
LREAGGAFGK	|Q9UII2|[67_67_41_49];|Q9UII2|[70_70_41_49]
RPPRAVAGNA	|Q6IQ55|[178_185_196_197]
PSGVRRAALS	|Q6DT37|[959_964_971_974]
LSGALSRPGR	|P04439|[13_17_37_41];|P30464|[13_17_37_41];|P30484|[13_17_37_41];|P30499|[13_17_37_41];|P30443|[13_17_37_41];|P01892|[13_17_37_41];|P13746|[13_17_37_41];|P30447|[13_17_37_41];|P18462|[13_17_37_41];|P30455|[13_17_37_41];|P30457|[13_17_37_41];|P01891|[13_17_37_41];|Q9TNN7|[13_17_37_41];|Q29963|[13_17_37_41];|P30505|[13_17_37_41];|P30510|[13_17_37_41];|Q95604|[13_17_37_41];|P30450|[13_17_37_41];|P3…
GRPKGCMGVL	|Q9NQ31|[47_47_44_52];|Q9NQ31|[50_50_44_52];|Q9NQ31|[66_66_44_52];|Q9NQ31|[73_73_44_52]
VVTTTTTTVV	|Q8N114|[145_150_152_155]
KRMGMACGLG	|Q14186|[301_309_304_304];|Q14186|[301_309_308_308];|Q14186|[301_309_312_312]
PRIGCHGSSL	|Q9H8H2|[606_606_621_629];|Q9H8H2|[609_609_621_629];|Q9H8H2|[634_634_621_629]
APHARNGLSI	|Q13422|[419_427_412_412];|Q13422|[419_427_418_418]
RPRLGATCGL	|O95881|[4_11_29_30]
KPGGRFLCGI	|Q5HYK3|[237_244_218_219]
PGRRPASSDI	|Q9UPR6|[581_589_600_600]
PRASRALSSL	|Q86VI1|[711_715_699_703]
PSRATGRLSL	|Q68CZ2|[753_759_775_777]
NPRGARVIAL	|Q8N0W3|[160_161_169_176]
LRGATGINLR	|Q7L273|[340_344_322_326];|Q09428|[387_390_383_388];|O60706|[383_386_379_384];|Q7L273|[340_343_321_326]
VDDLTSLGEK	|Q96GE6|[165_168_154_159];|Q96GE6|[165_167_153_159]
PRRPGDSLPS	|P78325|[180_181_189_196];|P78325|[188_189_189_196]
GLSDTRGLLR	|Q96P48|[40_45_63_66]
RISAAGFPIR	|Q9Y4I1|[691_698_690_691];|Q96H55|[659_659_651_659];|Q96H55|[663_663_651_659];|Q96H55|[668_668_651_659];|Q96H55|[673_673_651_659];|Q96H55|[674_674_651_659]
GRVRGCILTL	|Q99613|[421_421_439_447];|Q99613|[442_442_439_447];|B5ME19|[422_422_440_448];|B5ME19|[443_443_440_448]
HPRDPSLSAL	|O95190|[36_37_49_56]
RVASSSSLYK	|Q15652|[1051_1057_1077_1079]
RAYGGSMCQK	|P49207|[76_83_100_101]
HPHAVNEIAI	|Q96PY5|[244_252_225_225];|Q96PY5|[244_252_231_231];|Q96PY5|[244_252_251_251];|Q8IVF7|[247_255_228_228];|Q8IVF7|[247_255_234_234];|Q8IVF7|[247_255_254_254];|Q96PY5|[244_251_230_231];|Q8IVF7|[247_254_233_234]
HPRQPPAQGI	|P41440|[463_471_444_444];|P41440|[463_471_445_445]
SPRTRTGDVI	|Q9UHI6|[48_56_39_39]
GKQCGKTFSF	|P17017|[425_426_423_430];|P17017|[415_415_422_430];|P17017|[425_425_422_430]
GARFRSISTL	|Q15345|[438_439_458_465]
GVDVQAVRNR	|Q8N443|[39_44_33_36]
APRSWARCGL	|Q9Y256|[151_158_145_146]
YPRSLRSGPS	|Q8NEB9|[302_303_275_282]
GCVDGTFHKY	|Q9Y484|[313_313_327_335];|Q9Y484|[330_330_327_335];|Q9Y484|[341_341_327_335]
RPARLLECLG	|Q9Y2H9|[284_292_308_308];|Q9Y2H9|[284_292_313_313];|Q6P0Q8|[422_430_446_446];|Q6P0Q8|[422_430_451_451];|O60307|[278_286_302_302];|O60307|[278_286_307_307];|O15021|[481_489_463_463];|O15021|[481_489_505_505];|O15021|[481_489_510_510]
GARINRIMGF	|P49069|[56_57_43_50]
PLRDARVSDL	|Q2M296|[333_335_316_322]
GRVYISKCYG	|Q96TC7|[420_428_415_415];|Q96TC7|[420_428_420_420];|Q96TC7|[420_428_432_432]
GKLCGYVIFR	|Q14739|[497_497_494_502];|Q14739|[503_503_494_502]
SPSRNRSLQI	|Q3KQU3|[280_288_265_265];|Q3KQU3|[280_288_266_266];|Q3KQU3|[280_288_296_296]
RSKNNIPANF	|Q96QD9|[175_176_166_173]
KLGGNRQLNY	|O60762|[240_244_218_222]
GRFDREICGI	|O15381|[424_431_433_434]
KRFNSEILCG	|O95819|[923_931_936_936];|O95819|[923_931_942_942];|O95819|[923_931_946_946];|Q8N4C8|[1016_1024_1029_1029];|Q8N4C8|[1016_1024_1035_1035];|Q8N4C8|[1016_1024_1039_1039];|Q9UKE5|[1044_1052_1057_1057];|Q9UKE5|[1044_1052_1063_1063];|Q9UKE5|[1044_1052_1067_1067]
KRVESIQCGF	|Q14527|[889_896_875_876]
IPEEDRHCIG	|O95373|[83_91_76_76]
RTLDFADFGR	|O43432|[664_667_681_686]
KRFQQAGFNI	|Q9Y5T5|[698_706_686_686];|Q9Y5T5|[698_706_714_714];|Q9Y5T5|[698_706_719_719]
IPDSRRENEI	|Q8NCY6|[168_176_157_157];|Q8NCY6|[168_176_168_168];|Q8NCY6|[168_176_183_183];|Q8NCY6|[168_175_156_157]
ILDVRDRDSY	|Q9BYV8|[189_189_176_184];|Q9BYV8|[197_197_176_184]
RNEYLANSQY	|Q9BXY0|[30_33_46_51]
GGVFGRRAAI	|Q96QE2|[138_139_144_151];|Q96QE2|[129_129_143_151];|Q96QE2|[138_138_143_151];|Q96QE2|[139_139_143_151];|Q96QE2|[143_143_143_151];|Q96QE2|[146_146_143_151];|Q96QE2|[161_161_143_151]
ARLGGPRVTI	|Q9UPY3|[639_641_621_627]
GRIKGCTDNL	|O00151|[55_55_69_77];|O00151|[72_72_69_77];|O00151|[97_97_69_77]
RRNMGVSSGI	|O75815|[574_582_566_566];|O75815|[574_582_586_586];|O75815|[574_582_598_598];|O75815|[574_582_599_599]
PRGSGSEERL	|Q96KN9|[322_329_337_338]
SGRCRGIQAF	|Q9BW91|[52_53_28_35]
PRAVLAPLLR	|Q9Y4C5|[334_337_314_319];|Q9Y4C5|[334_336_313_319];|Q9Y4C5|[334_335_312_319]
RAAPPPPRPR	|Q7L2J0|[106_110_129_133]
RRFSGLLNCG	|Q9BTL4|[180_188_169_169];|Q9BTL4|[180_188_184_184]
RRFGILSNCG	|Q9H000|[254_262_257_257];|Q9UHC7|[297_305_282_282];|Q9UHC7|[297_305_300_300];|Q13064|[327_335_306_306];|Q13064|[327_335_312_312];|Q13064|[327_335_330_330];|Q9UHC7|[297_304_281_282];|Q13064|[327_334_311_312]
GKRNCFASVF	|O15144|[135_136_118_125];|O15144|[114_114_117_125];|O15144|[135_135_117_125];|O15144|[138_138_117_125]
KPRTEGKITI	|Q9Y5P8|[446_454_429_429];|Q9Y5P8|[446_454_453_453];|Q9Y5P8|[446_454_474_474]
PVGRDKPLRL	|P68104|[263_266_243_248];|Q05639|[263_266_243_248];|Q5VTE0|[263_266_243_248]
RVLAQNIIIK	|Q96PB7|[321_325_310_314]
GGSDCTTIHY	|P04637|[244_245_227_234];|P04637|[226_226_226_234];|P04637|[244_244_226_234];|P04637|[245_245_226_234]
RKIVEGISPG	|Q15126|[93_100_88_89]
PHVRSSGHVT	|O94759|[593_595_610_616]
PPEAHLKPAH	|Q9Y261|[359_366_347_348];|Q9Y261|[359_366_362_363]
GTRCPLVLKL	|P20591|[82_82_103_111];|P20591|[92_92_103_111];|P20591|[98_98_103_111];|P20591|[100_100_103_111];|P20591|[122_122_103_111];|P20592|[130_130_151_159];|P20592|[140_140_151_159];|P20592|[146_146_151_159];|P20592|[148_148_151_159];|P20592|[169_169_151_159]
GKRCKLLLGI	|Q10589|[16_16_18_26];|Q10589|[25_25_18_26];|Q10589|[27_27_18_26];|Q10589|[38_38_18_26]
RRVSQGLLGK	|A4D2P6|[222_223_210_217];|A4D2P6|[231_232_210_217]
RRLRAPGALI	|Q9UID3|[377_385_398_398]
GVVTKSRIRL	|P54762|[685_691_681_683];|P54753|[699_705_695_697]
KIRDVTKCLG	|Q99613|[72_80_87_87];|Q99613|[72_80_91_91];|Q99613|[72_80_101_101];|B5ME19|[72_80_87_87];|B5ME19|[72_80_91_91];|B5ME19|[72_80_101_101];|Q99613|[72_79_86_87];|B5ME19|[72_79_86_87]
GRYSGRVIVK	|P61353|[16_21_24_27]
GGRCFKLILK	|Q00403|[172_172_192_200];|Q00403|[192_192_192_200];|Q00403|[212_212_192_200]
HPSQTVRKAI	|Q32MZ4|[755_763_738_738]
RRVKSIPGII	|Q8NF50|[499_506_518_519]
KQTALVELIK	|P02768|[549_556_547_548]
APRNGFRSKI	|Q92833|[765_773_761_761]
RRVEVTRAGL	|Q9UII4|[48_54_40_42]
KRMVTKVCGF	|O95478|[147_154_159_160]
RRAELVFKCG	|Q9NQ89|[489_497_500_500];|Q9NQ89|[489_497_510_510];|Q9NQ89|[489_497_511_511]
RPRAPVRLEL	|A6NGR9|[470_477_481_482]
RLREQVLCHG	|Q9HCK8|[1895_1903_1917_1917]
RRFDDAVVQK	|P11142|[76_84_56_56];|P11142|[76_84_71_71];|P11142|[76_84_88_88];|P11142|[76_84_102_102]
PRRITDDQLK	|Q86UP3|[2087_2088_2090_2097]
KPYDCSHKRI	|Q96NG5|[178_183_170_173];|Q96NG5|[178_183_198_201]
HLPDRREIIC	|P35558|[221_229_212_212];|P35558|[221_229_245_245]
RRLGSLTHYR	|Q5T3U5|[1093_1099_1084_1086]
RRKQEMLAAR	|Q6UW78|[33_39_53_55]
PQRSSKMRRL	|Q6NV74|[232_232_235_243];|Q6NV74|[259_259_235_243]
RRVPFNQTLK	|Q7Z7M8|[204_205_217_224]
RTVEDVFLKR	|Q96EL2|[85_92_111_112];|Q96EL2|[85_91_110_112]
RPRDKQMELI	|Q9BUP3|[216_224_230_230]
IKREYEQTLK	|Q13948|[150_151_158_165];|P39880|[139_140_147_154]
GGRCHGHFGL	|P14317|[464_464_468_476];|P14317|[468_468_468_476];|P14317|[472_472_468_476];|P14317|[475_475_468_476]
RRGGAALLTR	|Q96FT7|[10_16_20_22]
HRDSHLTAVG	|P24855|[66_66_63_71];|P24855|[86_86_63_71]
FRKKLGGAGY	|O00481|[281_284_263_268]
LSTSYKTATK	|O95389|[188_194_213_215]
RRHGESICGL	|Q9H2M9|[384_391_379_380]
GKRCKLANVF	|Q9Y5P8|[451_452_460_467];|Q9Y5P8|[451_451_459_467]
PSADRHKSKI	|P22314|[876_884_862_862];|P22314|[876_884_875_875];|P22314|[876_884_886_886];|P22314|[876_884_890_890];|P22314|[876_884_891_891];|P22314|[876_884_894_894];|P22314|[876_883_889_890]
NVVEKKVDAR	|Q92784|[151_152_127_134]
RRALLERCLG	|Q15075|[1292_1300_1276_1276];|Q15075|[1292_1300_1302_1302];|Q15075|[1292_1300_1304_1304]
GKLCQHIIKR	|Q8NDN9|[442_442_457_465];|Q8NDN9|[466_466_457_465]
RRNDKQLCIG	|Q9HCG8|[246_253_229_230]
RVRDGFCFGR	|Q7Z478|[984_991_980_981];|Q7Z478|[984_991_983_984]
RRRDAVIADF	|P42356|[73_80_63_64]
GKRCHEFVTF	|P17252|[61_62_77_84];|P05771|[61_62_77_84];|P05129|[60_61_76_83];|P05129|[89_90_76_83];|P17252|[59_59_76_84];|P17252|[61_61_76_84];|P17252|[64_64_76_84];|P17252|[88_88_76_84];|P17252|[92_92_76_84];|P05771|[59_59_76_84];|P05771|[61_61_76_84];|P05771|[64_64_76_84];|P05771|[88_88_76_84];|P05771|[92_92_76_84]
RKQGRTLYGF	|P62805|[79_80_94_101]
GRLCNWVSRR	|O43432|[992_992_980_988]
RRWGPNVQRI	|Q92833|[619_627_611_611];|Q92833|[619_627_614_614];|Q92833|[619_627_631_631];|Q92833|[619_627_640_640];|Q92833|[619_627_648_648]
RRFKAQQDQI	|Q9NRR5|[43_51_26_26];|Q9NRR5|[43_51_28_28];|Q9NRR5|[43_51_41_41];|Q9NRR5|[43_51_55_55];|Q9NRR5|[43_51_60_60];|Q9NRR5|[43_51_72_72]
RPRGRGGLPL	|Q6ZW31|[636_642_626_628]
LRRPGKIVGK	|Q9BVS5|[211_214_190_195]
PHRPSLSRIK	|Q9HCX4|[306_306_304_312];|Q9HCX4|[326_326_304_312]
LGPRAAAAGAL	|Q9BUN1|[16_21_4_8]
GAQLCGGTVLL	|P08709|[234_241_228_230]
APAAARTPAIP	|Q9UQ35|[2223_2226_2245_2251]
RGPAAGALVLL	|Q13641|[7_12_22_26]
GSTCIYGGAPK	|P17844|[203_203_198_207];|P17844|[204_204_198_207];|P17844|[208_208_198_207];|P17844|[217_217_198_207];|P17844|[226_226_198_207];|Q92841|[268_268_275_284];|Q92841|[280_280_275_284];|Q92841|[281_281_275_284];|Q92841|[285_285_275_284];|Q92841|[294_294_275_284];|Q92841|[303_303_275_284]
APAPRSGECGL	|Q9Y3B6|[32_40_28_29]
LLYGPPGCGGK	|Q8NBU5|[130_138_138_139];|Q9Y276|[227_235_235_236];|P46459|[257_265_265_266];|P46459|[257_265_274_275]
SPLAASKECAV	|Q9H8H0|[278_286_274_275]
RHVIGGAAVTV	|Q8N2H3|[66_75_48_48];|Q8N2H3|[66_75_58_58];|Q8N2H3|[66_75_62_62];|Q8N2H3|[66_75_68_68];|Q8N2H3|[66_75_74_74]
SPKPGTGEPVI	|Q58WW2|[467_476_491_491]
GTPRCPPSGLL	|Q03518|[533_533_545_554];|Q03518|[552_552_545_554];|Q03518|[561_561_545_554]
PRSPGNLASTL	|Q9H0F6|[163_169_150_153]
STLTDSLVCGK	|P13639|[33_41_31_32]
GPVCAYDKTAL	|P46109|[236_238_249_256]
APEVAKSWAAI	|Q96Q15|[1612_1621_1592_1592];|Q96Q15|[1612_1621_1600_1600]
PGSQAHSALYL	|O94900|[379_380_363_371]
VPRASVPSVQI	|Q86YP4|[276_277_273_281];|Q86YP4|[297_298_273_281];|Q86YP4|[276_276_272_281];|Q86YP4|[279_279_272_281];|Q86YP4|[294_294_272_281];|Q86YP4|[297_297_272_281]
TPEGQRAVQAI	|O60701|[185_194_169_169];|O60701|[185_194_180_180];|O60701|[185_194_208_208];|O60701|[185_193_168_169]
FVSCGARQVPL	|O43246|[183_189_161_164]
LSLQPEGTPLK	|O95486|[341_347_363_366]
PPTQRGLATFP	|Q5TGY3|[874_876_882_889]
GTTDCLQILAY	|P35222|[277_277_297_306];|P35222|[278_278_297_306];|P35222|[307_307_297_306];|P35222|[319_319_297_306];|P35222|[320_320_297_306]
GATECLPLDKY	|Q7L0Y3|[320_320_332_341];|Q7L0Y3|[347_347_332_341]
EPDQSRQQTVI	|Q5SZL2|[691_700_712_712];|Q5SZL2|[691_699_711_712];|Q5SZL2|[691_698_710_712]
GGKQALTSCGF	|Q03426|[335_336_357_365];|Q03426|[337_338_357_365]
SPTPGTRSCGI	|P27987|[280_288_260_261]
VNSTTSTEASS	|Q685J3|[498_500_484_491]
SPVDGQGRCAV	|O94829|[155_163_142_143];|O94829|[155_162_141_143]
SPFSTGCGSRL	|Q00059|[31_34_23_29]
PVGWQAGKTGL	|Q6PRD1|[1219_1223_1195_1200]
SLSGPQCLCSK	|Q685J3|[4361_4369_4350_4351]
LPRGFGSLPAI	|Q15404|[101_110_82_82]
GGRCQLAGYGF	|Q9BPU9|[69_69_87_96];|Q9BPU9|[72_72_87_96];|Q9BPU9|[87_87_87_96];|Q9BPU9|[93_93_87_96];|Q9BPU9|[95_95_87_96];|Q9BPU9|[104_104_87_96];|Q9BPU9|[117_117_87_96]
GVWEEVGCAKG	|O95456|[91_100_76_76];|O95456|[91_100_91_91];|O95456|[91_100_97_97]
NPSSQRALCGI	|Q7RTP0|[220_228_208_209]
GQTDGCNGLRY	|P32780|[165_165_177_186];|P32780|[180_180_177_186];|P32780|[183_183_177_186]
GCLDPGQRALY	|P17097|[7_7_20_29];|P17097|[24_24_20_29];|P17097|[42_42_20_29];|P17097|[45_45_20_29]
GCLDPAQRALY	|Q8WV37|[25_25_43_52];|Q8WV37|[67_67_43_52];|Q86XU0|[6_6_24_33]
QTETAADCRYG	|O75362|[667_676_653_653];|O75362|[667_676_692_692]
HPISSEELLSI	|P14921|[189_198_181_181];|P14921|[189_198_191_191];|P14921|[189_198_209_209]
GCLDTAQKNLY	|A6NNF4|[2_2_20_29];|A6NNF4|[44_44_20_29]
GRMCTATGLYY	|Q9H6K1|[153_153_160_169];|Q9H6K1|[157_157_160_169];|Q9H6K1|[166_166_160_169];|Q9H6K1|[170_170_160_169];|Q9H6K1|[182_182_160_169];|Q9H6K1|[183_183_160_169];|Q9H6K1|[186_186_160_169]
GIPNFEGCRPF	|Q9HBL0|[193_198_202_206]
GCLDPAQRTLY	|Q96NG5|[83_84_60_68];|Q3MIS6|[6_6_24_33];|Q3MIS6|[48_48_24_33];|A2RRD8|[6_6_24_33];|Q7L2R6|[6_6_24_33];|Q6ZN06|[6_6_24_33];|Q96IR2|[6_6_24_33];|Q6PDB4|[5_5_23_32];|Q6PDB4|[47_47_23_32];|P0CJ79|[6_6_24_33];|Q9NV72|[72_72_90_99];|Q5VIY5|[6_6_24_33];|Q96SE7|[6_6_24_33];|Q96SE7|[48_48_24_33];|Q86XN6|[6_6_24_33];|P17035|[6_6_24_33]
SRYASPEMCFG	|P30566|[19_28_4_4];|P30566|[19_28_5_5];|P30566|[19_28_8_8]
GCLDTAQRNLY	|O75346|[2_2_20_29];|O75346|[44_44_20_29];|Q03923|[2_2_20_29];|Q03923|[44_44_20_29];|Q8NEM1|[11_11_29_38];|Q8NEM1|[53_53_29_38];|O75373|[2_2_20_29];|O75373|[44_44_20_29];|Q68DY1|[2_2_20_29];|Q68DY1|[44_44_20_29];|Q8TD23|[2_2_20_29];|Q8TD23|[44_44_20_29];|P35789|[2_2_20_29];|P35789|[44_44_20_29];|Q03936|[2_2_20_29];|Q03936|[44_44_20_29]
LDLKGVYGLLY	|Q9UDY8|[384_386_404_411]
QPDYSERLCGL	|P31785|[322_330_316_317]
LLDEAQRCAVY	|Q6P9A3|[43_50_33_35]
GKLCDVQPMQY	|Q9NUX5|[170_171_153_161];|Q9NUX5|[170_170_152_161];|Q9NUX5|[176_176_152_161]
YTEQQRCDGYG	|Q9Y561|[389_398_373_373];|Q9Y561|[389_398_383_383];|Q9Y561|[389_398_384_384];|Q9Y561|[389_398_387_387];|Q9Y561|[389_398_397_397];|Q9Y561|[389_398_404_404]
GAAGAVTGLPK	|O00268|[403_409_399_402];|O00268|[403_408_398_402]
GAGPNIHLLKG	|Q5TF58|[34_37_53_59]
SPASRQAAAKI	|Q86YP4|[340_349_363_363]
AASKERSGVSI	|P16403|[49_58_44_44];|P10412|[49_58_44_44];|P16402|[50_59_45_45]
PQVAGSVPRGR	|Q6UY14|[292_296_304_309]
SPMGRKQGGTI	|O14920|[550_559_544_544]
GISEARGSKDL	|Q96EF0|[671_677_649_652]
AKGSMPLLTSK	|Q9BXU7|[147_150_158_164]
ALPHGSRQSLA	|Q13796|[1237_1241_1225_1230]
PSNDNVISPSI	|Q9H799|[2612_2618_2594_2597]
GPNPKSSRTTI	|P17480|[661_670_649_649]
KPSISSSVSRI	|Q9C0D2|[2519_2528_2501_2501];|Q9C0D2|[2519_2528_2505_2505];|Q9C0D2|[2519_2528_2513_2513];|Q9C0D2|[2519_2528_2522_2522]
ISSKLSAVSLR	|Q15036|[444_444_433_442]
TPSKARNQCLG	|Q14680|[466_475_488_488];|Q14680|[466_475_495_495]
LPRDNKAAALL	|O95273|[149_149_166_175];|O95273|[174_174_166_175];|O95273|[175_175_166_175];|O95273|[177_177_166_175]
SPRSPTQHCGL	|O75161|[510_518_501_502]
GKVCNPIITKL	|P11142|[615_615_601_610];|P11142|[616_616_601_610];|P11142|[619_619_601_610];|P11142|[620_620_601_610];|P11142|[623_623_601_610];|P11142|[624_624_601_610];|P11142|[627_627_601_610];|P11142|[628_628_601_610];|P11142|[629_629_601_610]
TRAVDSSVILK	|Q0D2K0|[152_156_134_139]
GPQNPDSRARI	|Q9P2E5|[51_60_34_34];|Q9P2E5|[51_60_72_72];|Q9P2E5|[51_59_71_72]
APRNIRVNCGL	|Q9BTZ2|[201_209_191_192];|Q9BTZ2|[201_209_213_214];|P0CG22|[204_212_194_195];|P0CG22|[204_212_216_217];|Q6PKH6|[199_207_189_190]
KPSLNKSNVLI	|O43303|[292_301_289_289]
LNPAFARSRSI	|P0C2L3|[144_146_155_162]
TPKSEAVQEVR	|Q8IYW5|[230_233_242_248];|Q8IYW5|[230_232_241_248]
VHMGEKQSSHL	|Q14588|[197_202_215_219];|Q9UK10|[197_202_215_219];|Q9UK13|[219_224_237_241];|Q9NZL3|[197_202_215_219]
RRPPTAEELAL	|Q96HB5|[84_89_108_112];|Q96HB5|[84_88_107_112]
GKLCNIFSTKF	|P11388|[160_160_168_177];|P11388|[161_161_168_177];|P11388|[164_164_168_177];|P11388|[166_166_168_177];|Q02880|[181_181_189_198];|Q02880|[182_182_189_198];|Q02880|[185_185_189_198];|Q02880|[187_187_189_198]
LVYDVSHNIAK	|Q9Y3I0|[371_372_349_357]
RMMMQSGEAVK	|Q9H0C2|[249_257_269_270]
RPNDSRMLVAI	|Q9UJX2|[429_438_411_411]
LPSQSRNKETI	|Q14966|[189_198_173_173];|Q14966|[189_198_177_177];|Q14966|[189_198_209_209]
ETDTFKLHCYG	|Q9Y296|[138_147_122_122];|Q9Y296|[138_147_130_130];|Q9Y296|[138_147_133_133];|Q9Y296|[138_147_152_152];|Q9Y296|[138_147_165_165]
RVLIGEGVLTK	|Q9H8W4|[34_43_44_44];|Q9H8W4|[34_43_48_48];|Q9H8W4|[34_43_49_49];|Q9H8W4|[34_43_51_51];|Q9H8W4|[34_42_43_44];|Q9H8W4|[34_41_42_44];|Q9H8W4|[34_40_41_44];|Q9H8W4|[34_39_40_44];|Q9H8W4|[34_38_39_44];|Q9H8W4|[34_37_38_44];|Q9H8W4|[34_36_37_44];|Q9H8W4|[34_35_36_44];|Q9H8W4|[14_14_35_44];|Q9H8W4|[34_34_35_44];|Q9H8W4|[47_47_35_44];|Q9H8W4|[53_53_35_44]
SRPAHVNGGAL	|Q9HBL0|[465_468_486_492]
RPAACGRTGIS	|P30048|[31_38_23_25]
RMASSGGLCAR	|Q9BTZ2|[18_23_8_12]
GGRCGSVLVRL	|P15880|[168_168_186_195];|P15880|[171_171_186_195];|P15880|[175_175_186_195];|P15880|[186_186_186_195];|P15880|[189_189_186_195];|P15880|[201_201_186_195];|P15880|[203_203_186_195]
VSITNPSTIVS	|P51826|[1162_1166_1144_1149]
RPSTSRACVVG	|Q6PIJ6|[796_805_807_807];|Q6PIJ6|[796_805_810_810];|Q6PIJ6|[796_805_823_823];|Q6PIJ6|[796_805_824_824]
TISSNKSTSIP	|O75376|[1506_1513_1528_1530]
RPRANSGGVDI	|Q92766|[1162_1171_1181_1181]
GARNGVMPSHF	|P39019|[69_70_84_92]
GRPKCVDEVAF	|P35249|[27_27_45_54];|P35249|[30_30_45_54];|P35249|[68_68_45_54]
GRTCEWTGLKF	|Q6UXN9|[182_182_193_202];|Q6UXN9|[199_199_193_202];|Q6UXN9|[206_206_193_202];|Q6UXN9|[215_215_193_202]
RVYSPPEWIRD	|Q86V86|[208_217_189_189];|Q86V86|[208_217_198_198];|Q86V86|[208_217_203_203];|Q86V86|[208_217_205_205];|Q86V86|[208_217_237_237];|P11309|[296_305_277_277];|P11309|[296_305_286_286];|P11309|[296_305_291_291];|P11309|[296_305_293_293];|P11309|[296_305_325_325]
ARIAGKVPGLR	|Q8WWM7|[524_533_516_516];|Q8WWM7|[524_533_525_525];|Q8WWM7|[524_533_539_539];|Q8WWM7|[524_533_546_546];|Q8WWM7|[524_532_545_546]
ALLGVPHCRGK	|Q8N2U0|[54_62_37_38]
VNEGQSAKEML	|Q5THK1|[1008_1009_985_993]
AFPNRAHSTIV	|O75751|[116_120_136_141]
LALATQRISRP	|Q9HCJ1|[244_246_249_256];|Q9HCJ1|[244_245_248_256];|Q9HCJ1|[248_249_248_256]
GRIKEIFCPKG	|P26358|[994_1003_982_982];|P26358|[994_1003_994_994];|P26358|[994_1003_1007_1007];|P26358|[994_1002_981_982]
KPNISSRKLSE	|Q9NYY8|[150_152_154_161]
RHLMDNASSSF	|A0AVF1|[261_262_245_253]
GVRCIIPNHEK	|P35749|[703_704_677_685];|P35579|[696_697_670_678];|P35580|[703_704_677_685];|P35749|[662_662_676_685];|P35749|[688_688_676_685];|P35749|[703_703_676_685];|P35579|[681_681_669_678];|P35579|[696_696_669_678];|P35580|[688_688_676_685];|P35580|[703_703_676_685]
GKLCKEVPNYK	|P62851|[38_39_58_66];|P62851|[38_38_57_66];|P62851|[81_81_57_66]
GVNLRQAELKR	|Q13310|[293_296_272_278]
APRPDRLVNLR	|O75534|[747_755_773_774]
GKGTSPFTGLA	|Q9Y232|[283_289_277_280]
RPGVGGPDLRR	|Q0VDD8|[167_168_152_160]
GRLVKEGCSLR	|Q02641|[147_154_167_169]
LPRGSRAHITI	|P09543|[323_332_331_331];|P09543|[323_332_351_351]
RGELRGQVGLR	|Q9H2X0|[638_645_655_657]
RIREEGSIIGK	|Q15365|[38_42_26_31]
VPRGVRKESQI	|Q8N103|[539_548_553_553]
GKRCKLANVFF	|Q9Y5P8|[451_452_460_468];|Q9Y5P8|[451_451_459_468]
APRFHQAESHI	|Q6N021|[569_578_565_565];|Q6N021|[569_578_589_589]
RRQAMPFKCMG	|P50914|[46_55_40_40]
RRTGYLKGYTI	|Q9Y5S9|[108_117_89_89];|Q9Y5S9|[108_117_99_99];|Q9Y5S9|[108_117_102_102]
RYYRPGTVALR	|P84243|[41_42_42_50];|P84243|[54_55_42_50];|Q6NXT2|[40_41_41_49];|Q6NXT2|[53_54_41_49];|Q16695|[41_42_42_50];|Q16695|[54_55_42_50];|Q71DI3|[41_42_42_50];|Q71DI3|[54_55_42_50];|P68431|[41_42_42_50];|P68431|[54_55_42_50]
APRPKSHWDYI	|Q96L91|[805_814_785_785]
RRMEELHNEMQ	|P23246|[547_554_556_558];|P23246|[547_554_562_564]
GIVGSRVVPLN	|A8MX76|[96_99_118_124]
GELKKVEDAAA	|P54253|[585_592_564_566]
KRVSGACIGRI	|Q9H3R0|[818_825_799_801]
CAQPQRSVDVI	|Q8N3S3|[651_653_628_635]
LGDHLGQPVQR	|Q04912|[505_509_495_500]
RRVYLEGRCVG	|P30443|[180_189_186_186];|P30443|[180_189_191_191];|P30443|[180_189_199_199]
GRRCKLEEMGF	|Q92599|[309_309_301_310];|Q92599|[315_315_301_310];|Q14141|[307_307_299_308];|Q9P0V9|[331_331_323_332];|Q9P0V9|[336_336_323_332];|Q9NVA2|[306_306_298_307]
RAPNIHRHVIL	|Q9BQ70|[550_552_554_561]
KRFEAAKEDKI	|Q6VMQ6|[651_659_645_646]
PSKRDPKLYKK	|Q9NR48|[137_142_144_148]
KIREAEQQRVK	|Q53GS7|[214_215_221_229]
IKEEQRPERVK	|P13693|[92_93_104_112];|P13693|[99_100_104_112];|P13693|[122_123_104_112];|Q9HAU6|[92_93_104_112]
HVTDPAAEEAL	|Q6ZNJ1|[2313_2316_2291_2297]
IMGCTHDITTI	|Q9NQ89|[450_452_461_468]
GKRCVLKVHSF	|Q9NNW5|[897_897_910_919];|Q9NNW5|[939_939_910_919]
KEIEKYSSSIK	|Q6NSI4|[537_540_518_524]
HREIVNTEIHK	|Q86X52|[335_339_346_351]
RPQEPRNRSLR	|Q6ZNA4|[358_366_375_376]
PVRPAAAAATAL	|Q9UKJ3|[1456_1457_1470_1479]
LPRGGSVLVTCG	|P05362|[38_48_18_18];|P05362|[38_48_23_23];|P05362|[38_48_25_25];|P05362|[38_48_41_41];|P05362|[38_48_42_42];|P05362|[38_48_59_59]
LVVDNGSGMCKG	|P60709|[8_18_13_13];|P60709|[8_18_15_15];|P60709|[8_18_20_20];|P60709|[8_18_23_23];|P60709|[8_18_36_36];|Q562R1|[9_19_14_14];|Q562R1|[9_19_16_16];|Q562R1|[9_19_21_21];|Q562R1|[9_19_23_23];|Q562R1|[9_19_24_24];|Q562R1|[9_19_37_37]
TPRPSGPGPSSF	|Q96T58|[3012_3012_3026_3036];|Q96T58|[3045_3045_3026_3036];|Q96T58|[3048_3048_3026_3036];|Q96T58|[3052_3052_3026_3036];|Q96T58|[3055_3055_3026_3036]
GPDSSKTLLCLG	|Q14690|[1209_1219_1200_1200];|Q14690|[1209_1219_1209_1209];|Q14690|[1209_1219_1223_1223];|Q14690|[1209_1219_1230_1230];|Q14690|[1209_1219_1235_1235]
LVIDNGSGMCKG	|Q9BYX7|[8_18_13_13];|Q9BYX7|[8_18_15_15];|Q9BYX7|[8_18_20_20];|Q9BYX7|[8_18_23_23];|Q9BYX7|[8_18_36_36];|P63261|[8_18_13_13];|P63261|[8_18_15_15];|P63261|[8_18_20_20];|P63261|[8_18_23_23];|P63261|[8_18_36_36];|P0CG38|[708_718_713_713];|P0CG38|[708_718_715_715];|P0CG38|[708_718_720_720];|P0CG38|[708_718_723_723];|P0CG38|[708_718_736_736];|A5A3E0|[708_718_713_713];|A5A3E0|[708_718_715_715];|A5A3E0…
APKEALAQCVLG	|O75131|[498_508_479_479];|O75131|[498_508_517_517];|O75131|[498_507_478_479]
PTAAGDVRPITL	|O00139|[557_566_540_541];|O00139|[557_566_543_544]
VLDAGSSHTSIY	|Q9Y5L3|[43_52_55_56];|P49961|[52_61_64_65]
YTGGGDQNYSGY	|O14979|[379_381_366_374]
NTCQDAAIVGYK	|P07737|[5_5_16_26];|P07737|[10_10_16_26];|P07737|[42_42_16_26]
GVVCPVSDILYK	|P54687|[322_322_336_346];|P54687|[330_330_336_346];|P54687|[332_332_336_346];|P54687|[347_347_336_346];|P54687|[358_358_336_346]
IPDSSRQLDCLG	|Q12769|[1024_1034_1012_1012];|Q12769|[1024_1033_1011_1012]
GCTDLLNKANTY	|O95198|[160_160_170_180];|O95198|[198_198_170_180]
PSRHPLSGCSAP	|Q8TAI1|[88_92_101_107]
GRVLIGEGVLTK	|Q9H8W4|[33_43_44_44];|Q9H8W4|[33_43_48_48];|Q9H8W4|[33_43_49_49];|Q9H8W4|[33_43_51_51];|Q9H8W4|[33_42_43_44];|Q9H8W4|[33_41_42_44];|Q9H8W4|[33_40_41_44];|Q9H8W4|[33_39_40_44];|Q9H8W4|[33_38_39_44];|Q9H8W4|[33_37_38_44];|Q9H8W4|[33_36_37_44];|Q9H8W4|[33_35_36_44];|Q9H8W4|[33_34_35_44];|Q9H8W4|[23_23_34_44];|Q9H8W4|[26_26_34_44];|Q9H8W4|[33_33_34_44];|Q9H8W4|[38_38_34_44];|Q9H8W4|[40_40_34_44];|Q9…
AVYEGHVSCVKG	|P58546|[75_85_58_58];|P58546|[75_85_79_79];|P58546|[75_85_91_91];|P58546|[75_85_98_98];|P58546|[75_85_101_101];|P58546|[75_84_57_58];|P58546|[75_84_90_91];|P58546|[75_84_97_98];|P58546|[75_83_96_98]
KSLDEQCVVGKG	|O15162|[248_258_232_232];|O15162|[248_258_241_241];|O15162|[248_258_257_257];|O15162|[248_258_265_265];|O15162|[248_258_278_278]
VSGSRSPDRPSK	|Q8N5F7|[4_12_30_32]
GRYEVAVPLCKG	|Q9NSK0|[225_235_204_204];|Q9NSK0|[225_235_225_225];|Q9NSK0|[225_235_246_246];|Q9NSK0|[225_235_248_248];|Q07866|[227_237_206_206];|Q07866|[227_237_227_227];|Q07866|[227_237_248_248];|Q9H0B6|[212_222_191_191];|Q9H0B6|[212_222_212_212];|Q9H0B6|[212_222_233_233]
GKLCEGFNEVLK	|Q9Y6H1|[129_129_132_142];|Q9Y6H1|[136_136_132_142];|Q9Y6H1|[149_149_132_142]
GYTLSSRSHSIF	|Q9P2E2|[199_202_207_214]
SPRAANPFQQKI	|Q9C0H2|[300_310_292_292]
KCTIESIFPGFK	|Q92800|[82_92_61_61];|Q92800|[82_92_62_62];|Q92800|[82_92_72_72];|Q92800|[82_92_81_81];|Q92800|[82_92_82_82]
HPAPEENLRLQY	|Q9HD67|[1820_1827_1834_1837];|Q9HD67|[1820_1826_1833_1837]
RPRLGATCLGLG	|O95881|[4_12_29_31]
AGPRREEAVSAL	|Q6RFH5|[35_36_39_48]
SPRAQREVSCGI	|Q05823|[398_407_378_379]
KITEPASVPIHK	|Q15042|[390_391_368_377]
RVYVSPADSPFR	|Q9UP52|[712_713_721_730]
RVYSPPEWGRSA	|Q86V86|[208_215_223_226];|P11309|[296_303_311_314]
LPGKLCRLAKGE	|Q5T2W1|[398_400_377_385];|A8MUH7|[281_283_260_268]
IVRTGGHFICKG	|Q8N1G2|[394_404_398_398];|Q8N1G2|[394_404_399_399];|Q8N1G2|[394_404_415_415]
RLADKSVLVCKG	|Q15021|[412_422_411_411]
PSDSKAKTRTPL	|Q9UQ35|[1549_1550_1564_1573]
PVDAPNPQNILK	|Q9UDY8|[427_433_443_447]
GVRCLNVGLIRK	|Q9NWZ3|[17_17_11_21];|Q9NWZ3|[31_31_11_21]
RPIATAGLHRQI	|E9PQ53|[50_60_33_33];|E9PQ53|[50_60_43_43];|E9PQ53|[50_60_47_47];|E9PQ53|[50_60_52_52];|E9PQ53|[50_60_64_64];|O95298|[50_60_33_33];|O95298|[50_60_43_43];|O95298|[50_60_47_47];|O95298|[50_60_52_52];|O95298|[50_60_64_64]
APRPTRPDKAQL	|P61313|[39_48_32_33]
KPDFKRSIVCGL	|Q8N5C6|[903_912_888_889]
GSIMKCDVDIRK	|Q562R1|[303_304_283_292];|P63261|[268_268_281_291];|P63261|[273_273_281_291];|P63261|[301_301_281_291];|P63261|[302_302_281_291];|P63261|[308_308_281_291];|P60709|[268_268_281_291];|P60709|[273_273_281_291];|P60709|[301_301_281_291];|P60709|[302_302_281_291];|P60709|[308_308_281_291];|Q562R1|[269_269_282_292];|Q562R1|[274_274_282_292];|Q562R1|[302_302_282_292];|Q562R1|[303_303_282_292];|Q562R1|[…
ARVKEVEEMCKG	|Q13315|[2150_2160_2180_2180]
QTWTVVDAKTLK	|P13010|[269_269_275_285];|P13010|[290_290_275_285]
QPRNLDKERAVI	|Q8IZD2|[164_174_144_144];|Q8IZD2|[164_174_149_149];|Q8IZD2|[164_174_154_154]
SPHGHSRGPLAI	|Q5T3U5|[125_135_113_113]
RPRRGQPGAASL	|Q6ZMN8|[77_81_61_67]
RSSSSQAIVHPV	|Q96D71|[427_432_449_454]
GYRCGESGHLAK	|P62633|[35_35_55_65];|P62633|[36_36_55_65];|P62633|[42_42_55_65];|P62633|[58_58_55_65];|P62633|[61_61_55_65];|P62633|[78_78_55_65];|P62633|[80_80_55_65];|P62633|[81_81_55_65]
PGRGARRLLALV	|Q9NS67|[263_271_254_256]
PVRDGRRAGNAL	|P0C1Z6|[212_213_197_206]
RPNLSHTGRGII	|Q13356|[355_365_365_365];|Q13356|[355_365_382_382]
RERPELPEGPVG	|Q8N6L0|[18_22_3_9]
GKRCQYVTEKVL	|P04075|[182_182_200_210];|P04075|[195_195_200_210];|P04075|[226_226_200_210];|P09972|[182_182_200_210];|P09972|[195_195_200_210];|P09972|[226_226_200_210]
GRRCGNNPLIGR	|O60306|[1252_1253_1244_1253];|O60306|[1232_1232_1243_1253];|O60306|[1246_1246_1243_1253];|O60306|[1252_1252_1243_1253];|O60306|[1265_1265_1243_1253]
IAYQKKKLCFKG	|P14209|[146_156_125_125];|P14209|[146_156_129_129];|P14209|[146_156_132_132];|P14209|[146_156_140_140];|P14209|[146_156_162_162]
RPRSSSDNRNFI	|Q9HBU6|[5_15_31_31]
GRVCSNRHGLIR	|P62273|[2_2_22_32];|P62273|[15_15_22_32];|P62273|[17_17_22_32];|P62273|[29_29_22_32];|P62273|[35_35_22_32];|P62273|[51_51_22_32]
RRLDTVRSICHG	|Q68EM7|[34_44_17_17];|Q68EM7|[34_44_56_56];|Q68EM7|[34_44_59_59];|Q68EM7|[34_43_58_59]
RIKFSDDRVCKG	|Q9Y383|[27_37_16_16];|Q9Y383|[27_37_21_21];|Q9Y383|[27_37_51_51];|Q9Y383|[27_37_57_57]
PSDGRRSRYVRL	|Q9NR96|[999_1000_974_983]

## Sheet: HCT116 nonspliced
sequence	annotation
AEAAAVHGA	|Q5T8P6|[938_946]
AEAAVVAVA	|Q8IZQ5|[10_18]
AEGPGSSQA	|P40222|[43_51]
ALAPGLPTA	|Q9UMX5|[21_29]
AEAAGVKPA	|Q92625|[391_399]
SEGDIGGIA	|O95147|[20_28]
SEGNVATAA	|Q92922|[862_870]
ALGPTGRGV	|O15270|[351_359]
SEADPSGVA	|O15304|[102_110]
PLGPAPVSV	|P57086|[75_83]
AEARPGATA	|Q96C34|[47_55]
AEAKAATSP	|Q8IVT2|[453_461]
AMPQSGTGV	|O00487|[74_82]
AEVKGSVSA	|O94762|[881_889]
LLGPPPVGV	|Q9ULV3|[159_167]
TEKSGSIGA	|Q96FZ2|[149_157]
QEADAGPAP	|Q9BXF6|[89_97]
SEASKLGAP	|O94992|[125_133]
VVLPAPPAV	|Q96S59|[33_41]
AEAPPPSVV	|Q92841|[46_54]
AEAAGKYSA	|Q07617|[462_470]
LLLAAPAQA	|P17900|[15_23]
VEKPVGVAA	|Q14687|[930_938]
AEAPPGVET	|P53990|[185_193]
AAEEPNAAV	|P08238|[696_704]
AEAGGMHTV	|P18754|[72_80]
TESPPSLAA	|Q8N9H8|[115_123]
AEAAVVLEA	|A6NKF1|[166_174]
SEHGGCSTP	|Q96JM7|[553_561]
AETGHTSTA	|P57078|[693_701]
AELEGASTP	|Q8WVB6|[27_35]
GEIKGSESA	|Q6PKG0|[286_294]
AETAATLTT	|P23921|[61_69]
NSEVGASGY	|Q08211|[124_132]
AESLQPVAA	|Q8NFC6|[2165_2173]
TEAKPAVVA	|Q12906|[486_494]
AEAAALEVL	|O95229|[8_16]
AESDPSNAP	|Q96JJ3|[326_334]
AEERGGTPA	|Q96JY6|[251_259]
SSDPSLIGL	|Q9UHI6|[268_276]
AEGAFPNLA	|Q9BTL4|[167_175]
AENNSEVGA	|Q08211|[121_129]
AEDRAATSA	|Q92968|[223_231]
GAQGEPLGY	|P35222|[701_709]
AADPISGDF	|P46013|[195_203]
SAESSSSKL	|O75132|[530_538]
AEGKPPEAP	|P56192|[886_894]
AEVAGILEP	|O95229|[17_25]
SQADVIPAV	|Q96EN8|[515_523]
EEMGVPVAA	|O94927|[16_24]
QEVAQVASA	|Q13751|[646_654]
ALTSVVVTL	|Q00534|[175_183]
GLATDVQTV	|P49720|[55_63]
SEVGKLLSA	|Q9H977|[262_270]
QEADGARSA	|O96005|[5_13]
HEIGHGIAA	|O43462|[171_179]
AADDSSVKL	|Q9UMS4|[410_418]
AEGHPDPDA	|P49756|[552_560]
LSDPGSGLY	|O95424|[73_81]
KEAPAPPKA	|P62750|[7_15]
QSDGGGLLY	|Q7RTS9|[239_247]
GADLPSNHV	|O14744|[209_217]
ATDPKAIGH	|Q99437|[120_128]
SSSGDPAEY	|P02545|[571_579]
SEYEAGSTA	|Q8NEY8|[253_261]
SEAPPTNQA	|Q9Y5V3|[37_45]
TEIGSIHSA	|Q86VP3|[333_341]
AEVEVSIPA	|Q00341|[654_662]
TELGSTHTA	|Q7Z434|[200_208]
KEAGPSKEA	|Q9ULJ3|[898_906]
AEAEKQLGA	|Q9NR46|[119_127]
AEAEARAEA	|Q9Y5V3|[682_690];|Q12816|[655_663]
TADDPSLSL	|P39656|[78_86]
SEETPLTAA	|Q8IXM3|[81_89]
AEDKASVKA	|Q9Y6K9|[136_144]
AEQDSTTVA	|Q86U44|[180_188]
QEAEAFVGA	|O15031|[1126_1134]
SADPLNSAF	|P42285|[555_563]
SSDPDPAAY	|Q9UQF2|[310_318]
AEQYPGGMA	|Q12948|[53_61]
KIGEGTYGV	|Q00526|[9_17];|P06493|[9_17];|P24941|[9_17]
SEHGLVVIA	|P10768|[72_80]
ALSGHLETV	|P07355|[90_98];|A6NMY6|[90_98]
EEGSPTPVL	|O00255|[429_437]
EEALPVTTA	|Q92522|[6_14]
SISDVIAQV	|Q9HCJ1|[165_173]
TEKENGPSA	|Q9UL63|[317_325]
AEAEASREA	|P27105|[209_217]
AEAESRAEA	|Q14764|[724_732]
AEISAMLKA	|Q99575|[113_121]
AEQGQVCTV	|P30989|[271_279]
SEGPPLTSF	|O95071|[2161_2169]
KAPPKPARA	|Q14978|[197_205]
AENKTTTTA	|Q9H0A0|[444_452]
GTDTGVVQY	|Q8NEZ3|[491_499]
VADPDNPLV	|P39656|[203_211]
NTEGKGTAY	|Q13546|[431_439]
RLVPSVNGV	|P11586|[478_486]
SEHASQSVP	|P12270|[2234_2242]
AEAQKLGKP	|Q12888|[879_887]
KLDVGNAEV	|P51572|[167_175]
SQDPFPAAI	|Q96KB5|[134_142]
EELSNVLAA	|Q9Y3U8|[88_96]
NVDTPVSTL	|Q96L50|[115_123]
AEALREVSA	|P15313|[298_306];|P21281|[304_312]
AEEDGRAQA	|Q96EK9|[138_146]
AEKSITQVA	|Q9Y4E5|[347_355]
SESDKAITP	|Q02952|[1753_1761]
VSDPVGVLY	|Q9P055|[123_131]
QESGFSHSA	|O60907|[68_76];|Q9BZK7|[17_25];|Q9BQ87|[17_25]
AEKGDMNNA	|Q12996|[309_317]
EEESGGRSV	|P12270|[2203_2211]
AEKDEMVGA	|Q96RF0|[397_405];|Q8WV41|[348_356]
TLAEIYVAA	|P36956|[714_722]
TESGNVFVV	|Q6P1M3|[148_156]
NLAGVYSEV	|Q9Y295|[83_91]
AEAIHSPQV	|P12270|[2150_2158]
ESSQSFVAV	|O43164|[114_122]
TESSQSFVA	|O43164|[113_121]
VVVDPIQSV	|O00487|[143_151]
TEFAPPPTP	|Q9BRQ0|[59_67]
EEATNILTA	|Q15057|[153_161]
AEQSKAEEA	|Q8IWV8|[851_859]
EENASQSTV	|Q12905|[212_220]
AEEPDLHGP	|O94761|[659_667]
SQDFPGSNL	|P15036|[255_263]
SADPGNLKY	|Q6P435|[32_40]
EEVKTGKCA	|Q9H0U9|[153_161]
VVCPLYISA	|Q9Y576|[192_200]
AEHSEPPQA	|Q9H3Y8|[75_83]
AEYLSANVV	|Q96DY7|[216_224]
YSDASGFGY	|Q8N2S1|[280_288]
NEQGSYVVA	|Q16531|[341_349]
SEVQKGFTA	|Q5TH74|[19_27]
SADEPGVMY	|Q8NI77|[126_134]
TENQSGVSF	|P05023|[403_411]
YEEAAMAIA	|Q15717|[295_303]
AEEAEHRGA	|Q14493|[45_53]
TVADKIHSV	|O95147|[92_100]
AESENPPRA	|Q9H0W8|[438_446]
VADHPGIDF	|Q9UGU5|[426_434]
EEITGTQPP	|Q8N4C8|[872_880]
EEEKAVAVP	|Q96JM7|[239_247]
AERVAAERA	|Q9H2U1|[273_281]
TIDPSNPMV	|Q6PD62|[263_271]
GEEKNTPKA	|Q9Y6J0|[1302_1310]
SLDKTSHSV	|Q12789|[1308_1316]
VSDDGTLHM	|Q9ULX3|[300_308]
DEVPVGVEM	|Q5VZL5|[1450_1458]
NEIKDSVVA	|P13639|[673_681]
AENYLGHTA	|P38646|[178_186]
KEVENSQAA	|Q9H8W3|[200_208]
KLGAVFNQV	|Q15393|[769_777]
TEGSHFVEA	|Q8IWA4|[30_38]
AEEARQMAA	|O00410|[55_63]
KEKEGSEVA	|Q5VIR6|[534_542]
RMLPHAPGV	|Q13547|[371_379];|Q92769|[372_380]
NVDDPTGNF	|Q12907|[305_313]
SEIDMSVKA	|Q8WUM9|[478_486]
TEIKVGVAY	|P30520|[370_378]
YSDAPVSEL	|O60337|[517_525]
AEISHHISS	|Q8WW33|[62_70]
AEIEDPPIP	|Q92922|[251_259]
DEYGVSQAL	|P51532|[716_724]
YTEAGQTVI	|Q5SRE5|[770_778]
SEHPDQAQA	|Q01082|[1024_1032]
EEQGVAHNV	|Q9Y5A7|[143_151]
QSGSESLLY	|Q9UJX5|[353_361]
NVDPDNVVL	|P24522|[48_56]
AELGMEHQA	|Q9Y285|[28_36]
AEQDPEARA	|Q6XQN6|[3_11]
AEQKKLEAA	|P15559|[87_95]
EEAKKIAKA	|Q6UW63|[430_438]
SLDQPTQTV	|Q99613|[834_842];|B5ME19|[835_843]
QESPINVTT	|Q7Z5K2|[1134_1142]
AEEFPNLAV	|Q96T21|[406_414]
EEAENGRDA	|P06454|[25_33]
DEWSGLNGL	|Q86UE4|[377_385]
LLDDTTVTL	|Q8TEA7|[375_383]
TEEALHASH	|Q9P0J0|[130_138]
NSDTHSSTF	|P04406|[287_295]
VINPEPITL	|Q5VWN6|[1046_1054]
ASEDSVLLY	|Q13112|[322_330]
REANHNVSA	|Q96F07|[850_858];|Q7L576|[826_834]
KEQPPQLSA	|O75864|[464_472]
IGYPMPTGY	|P17844|[604_612]
GTDGHVHLY	|Q96EX3|[412_420]
NEQGNFPPP	|Q15459|[290_298]
EERPPTLSA	|Q9NQ31|[76_84]
SLPVEVQEV	|Q96P16|[189_197]
AEDDVPRKA	|Q96EI5|[118_126]
GLNEEIARV	|O14777|[330_338]
AEQVSHHPP	|Q9BZF1|[509_517];|Q9BXB5|[530_538];|Q9BXB4|[506_514];|Q9H0X9|[473_481];|Q96SU4|[496_504]
FVDLSGHNL	|O94985|[839_847]
ARNTVTQVL	|Q9P2B4|[501_509]
SEYLGVTSF	|Q8WUB8|[95_103]
REMPGVWGA	|Q9ULV3|[536_544]
RENISNAQA	|P51116|[351_359]
AEEQNSQTP	|P52948|[1479_1487]
VDKTGASYY	|Q9BY44|[243_251]
QEKEPSKSA	|Q02952|[273_281]
SSDNPQPEM	|O14641|[91_99]
SEWDGIVTV	|Q9NRA0|[236_244]
YVDPVITSI	|P08581|[654_662]
AEALIKHKP	|P40227|[419_427]
HIIENIVAV	|O76021|[225_233]
SSDVGHDEY	|Q01082|[769_777]
EEVASHHEA	|Q53GS7|[490_498]
TTDDPALLY	|Q86WK9|[232_240]
KEYDALKAA	|Q96AG4|[201_209]
SENQHLVSP	|P68400|[287_295];|Q8NEV1|[287_295]
SSDPYHSGY	|Q9BXP5|[88_96]
REHETNGVA	|P42224|[180_188]
SEQQALHTV	|Q5SRE5|[1542_1550]
HTDLPVSVF	|Q7L5N1|[160_168]
ASDPYQVHV	|P30876|[1110_1118]
RVIGTLEEV	|P46060|[205_213]
SLDTQPKKV	|P15923|[165_173]
AEVETRIEA	|Q96KP1|[326_334]
QLVDTTVEL	|O75533|[832_840]
NEHDYAKAA	|Q15006|[167_175]
EEDQGSKLI	|Q9Y241|[13_21]
TEDDRKLAA	|P13994|[221_229]
REIESTDTA	|Q9Y2D4|[23_31]
YIDQGIAEL	|Q9Y265|[286_294]
REKDSVMSA	|Q7Z7H8|[241_249]
SSDPQAQKY	|Q0VDF9|[75_83]
HTDPQPSNK	|Q02224|[2518_2526]
NTDLGNDLY	|Q8WVC0|[366_374]
RETEPPPKA	|P18858|[29_37]
YLDNGVVFV	|Q16531|[316_324]
KEAPPMEKP	|P62841|[65_73]
AEHLMLLEA	|Q58WW2|[751_759]
LLDPSVFHV	|Q9BVI4|[333_341]
SETNHTSRP	|Q8N488|[138_146]
AETEFFSKA	|Q15468|[362_370]
AEEVWARVA	|Q96SK2|[315_323]
KEMPVKVEA	|O15397|[510_518]
AEQESARQL	|Q15149|[2165_2173]
YDSDLAVSY	|Q9UHV7|[772_780]
VRNPFTVTV	|Q49AG3|[574_582]
AEMEKQKVA	|Q9H3S7|[1292_1300]
RESPSMKKA	|Q9Y6G5|[10_18]
EENYNVVAP	|Q8WU76|[321_329]
EEEETSIKA	|O15213|[138_146]
AEYNVNNLV	|P49327|[732_740]
YTDATPLRV	|Q8N8A6|[304_312]
YSGAAEYLY	|P60228|[144_152]
NERPPQPQA	|Q6UVK1|[1829_1837]
TTDLFGRDL	|P52597|[256_264]
FLDSEVSEL	|Q9BPX3|[699_707]
DENSVIKSF	|Q9H8H0|[199_207]
DEVQVVRGH	|P61254|[53_61];|Q9UNX3|[53_61]
ALAEKEHKL	|Q96P16|[254_262]
AERMGFTEV	|P55265|[799_807]
DVDTSQVLY	|P35222|[56_64]
KEHKNLAEA	|Q96TA2|[741_749]
EESKNEYAA	|Q15642|[184_192]
AELQKVRKA	|Q14152|[599_607]
SSDDSKLEY	|Q15057|[251_259]
RLTDEQVAL	|Q14137|[195_203]
HLNGHIKQV	|Q9HBE1|[427_435]
AELKNIKQC	|P49454|[507_515]
SEMRTSHEA	|Q96JM7|[646_654]
IADMGHLKY	|P12004|[241_249]
EEEKKNLSA	|P33981|[197_205]
MELERIVSA	|Q9H467|[1_9]
GLNDFIQKI	|O00141|[34_42]
SENTNQREA	|P51587|[253_261]
NSDPNINQF	|P03915|[109_117]
QSDPKPSQY	|Q9HCH5|[378_386]
NESEPIVVY	|P42892|[362_370]
KIDEPSTPY	|P41236|[67_75];|Q96PQ5|[67_75]
VEDPVTVEY	|O14818|[98_106];|Q8TAA3|[106_114]
ASDRNIVLY	|Q9NV06|[216_224]
SSDVSHQEY	|O60381|[78_86]
LLDEPTNHL	|Q9UG63|[251_259]
TESAFHYEA	|P16144|[263_271]
REIGENHEA	|Q96JI7|[2229_2237]
AEREHVSRA	|Q96RU8|[100_108]
NSELSCQLY	|P04818|[205_213]
FTDIDGQVY	|Q9BZH6|[681_689]
AEQIARWIA	|Q9H0U3|[163_171]
SEQETLVRP	|Q00987|[22_30]
DEGVYVNTY	|O95819|[1139_1147];|Q8N4C8|[1232_1240];|Q9UKE5|[1260_1268]
AEHPVYNMV	|Q92547|[97_105]
AERDFIHTA	|Q9NR46|[128_136]
MLNGQEVRL	|Q13425|[451_459]
EEQVRSLEA	|Q01664|[173_181]
VEYESHRAA	|Q9NQ94|[184_192];|A0AV96|[199_207];|Q8TBY0|[189_197]
AEHFSMIRA	|Q6ZN04|[131_139];|A1L020|[197_205];|Q5U5Q3|[297_305]
RLQESVMEA	|O60216|[450_458]
DEAAFLERL	|Q05682|[92_100]
NSEEHSAKY	|Q7Z7A4|[474_482]
QTDPVTLQY	|Q9BYK8|[612_620]
KIYEGQVEV	|P46777|[117_125]
YSDKYGLGY	|P53350|[417_425]
AEFELPKTM	|P78318|[122_130]
HEYEGHHSA	|Q8IXB1|[535_543]
ASEQDILKY	|Q9P203|[458_466]
NQVIFPVSY	|Q9GZZ1|[23_31]
LTDLVDDNY	|Q6P2Q9|[246_254]
FVDPLVTNY	|Q9H3H1|[85_93]
YADEKTKDV	|Q02952|[1270_1278]
KELEKTYSA	|P02545|[261_269]
HSDPMFSSY	|Q9BZ95|[877_885]
DSDMQTLVY	|Q9UID3|[101_109]
ILDQKINEV	|P11926|[23_31]
ILDKKVEKV	|Q58FF7|[443_451];|P08238|[570_578]
HELPDVSEF	|Q9NPA0|[205_213]
NVDPVQHTY	|O00468|[56_64]
EEAQHFIKA	|Q96N21|[264_272]
RLQSKTIKV	|Q15717|[85_93]
VSDSKQFTY	|Q00653|[317_325]
VSELKEELK	|Q00839|[13_21]
VADKVHLMY	|Q14258|[593_601]
REHPKLKAP	|Q9UDY8|[354_362]
HENESVYKA	|P52292|[479_487]
KRGDVIYIL	|O75563|[319_327]
RELEVQHPA	|P50990|[74_82]
EERADLIAY	|P99999|[90_98]
TLYEAVREV	|P62906|[9_17]
ISEDKNPDY	|P14923|[652_660]
KTDPENTDY	|Q9BW85|[90_98]
NTEEEGLKY	|Q9NYF8|[430_438]
ESDINSVRY	|O14775|[281_289]
NTEGLHHLY	|Q5MIZ7|[187_195];|Q6ZMV5|[187_195]
MEQQPTRPP	|Q96JC9|[123_131]
TELQGMNEY	|Q14839|[1268_1276]
SENEYIMKA	|P55060|[567_575]
AEYQAFREA	|Q8N5A5|[77_85]
FLDEPTNHL	|Q9UG63|[539_547]
QRNEVVVEL	|O00629|[28_36]
KTDKQPLQK	|Q9P2J5|[924_932]
YSDVHNCSY	|Q6FIF0|[175_183]
SLQDEIQRV	|Q9UNX4|[348_356]
QEVDRIKEA	|O60282|[899_907];|Q12840|[895_903];|P33176|[897_905]
KLHYVVTEV	|Q9Y4A5|[911_919]
QENPNMRLS	|Q96CT7|[186_194]
TTEVHPELY	|Q9Y282|[51_59]
KTDGKKSYY	|P26358|[739_747]
HLNSHVRQV	|P56270|[351_359]
VQYNEPLKV	|Q14690|[1685_1693]
NTDPHSQEY	|Q99613|[461_469];|B5ME19|[462_470]
DEAKHAEKY	|Q9UJF2|[981_989]
RVDDPQDVF	|O94901|[358_366]
DEEDTKRVV	|Q99613|[41_49];|B5ME19|[41_49]
VESELLHTY	|Q99624|[348_356];|Q96QD8|[354_362]
NEDLRSWTA	|P04439|[151_159];|P01889|[151_159];|Q04826|[151_159];|Q31610|[151_159];|P30499|[151_159];|Q29865|[151_159];|P30443|[151_159];|P13746|[151_159];|P18462|[151_159];|P16190|[151_159];|P30455|[151_159];|P30457|[151_159];|P30460|[151_159];|P30480|[151_159];|Q9TNN7|[151_159];|Q29963|[151_159];|P30505|[151_159];|P30510|[151_159];|Q95604|[151_159];|P30450|[151_159];|P16188|[151_159];|P10314|[151_159];|P3…
FSDVDSPYY	|Q9BXL8|[181_189]
SESEKQWKA	|Q96HQ2|[31_39]
TVDKHSDEY	|P17676|[266_274]
VVRHQLLKT	|P15954|[55_63]
QEYPDDRTA	|Q5VWQ8|[540_548]
KEQEAKYQA	|O95721|[154_162]
REHFQHVAA	|Q9H2P0|[186_194]
TEEEKNFKA	|P26373|[170_178]
SEQREFVMA	|Q8N392|[497_505]
HRNEVTVEL	|O00505|[28_36]
HLYDIHVTV	|A8MXV4|[348_356]
AEQDSWYQA	|P35568|[101_109]
QTEATQEKY	|Q9BZF1|[699_707]
SLYDYNPNL	|Q99613|[381_389];|B5ME19|[382_390]
DEGKMKLDY	|P46781|[88_96]
MTERQALSY	|Q9Y2K2|[981_989]
MEHNRVLEA	|P49327|[2378_2386]
YEDGSIRIF	|Q9UNX4|[84_92]
QSSLETHHY	|Q9BVX2|[232_240]
NENDIITHF	|Q9ULK4|[772_780]
DEHEVNNTF	|Q684P5|[252_260]
SEKQRWISA	|Q8IW93|[690_698]
REKEFNKGP	|Q16531|[198_206]
STDLQDYTY	|O94973|[241_249];|O95782|[241_249]
AEMPQNYRP	|Q14258|[482_490]
EEQKMIEKA	|Q9Y584|[57_65]
EENRNNAYP	|Q8NBF2|[396_404]
DEKRFLVTV	|O14980|[512_520]
EEAKKFRKA	|O00401|[125_133]
NTDFGDEFY	|Q16236|[278_286]
LEKELVSKY	|Q5SRE5|[165_173]
VSDNDIRKY	|P55072|[747_755]
HEAQHFRDA	|Q13129|[791_799]
VTEIDQDKY	|P21333|[2380_2388]
KETEQNYEA	|Q99996|[1367_1375]
GSEEKNERY	|Q14155|[492_500]
VTEEFQPVY	|P05556|[337_345]
MSEDKPQDY	|P35222|[662_670]
HEIITPEQF	|Q29RF7|[906_914]
FVDDYTVRV	|O00487|[61_69]
AENIWQEQP	|O60566|[511_519]
RSEKMTLSY	|Q9Y4X0|[298_306]
DEVYQVTVY	|Q00987|[273_281]
GTVYEDLRY	|O00762|[71_79]
KRNDYVHAL	|Q99873|[266_274]
RLKEELEEA	|Q04637|[879_887]
AEQLEDKKR	|O95394|[391_399]
ATEKHLQKY	|Q96C86|[135_143]
RTDHELGKY	|Q9H0H5|[46_54]
VLIDYQRNV	|O14980|[784_792]
EENEIIYNP	|Q12874|[372_380]
MTESKFSKY	|O15042|[825_833]
KSDVHLNFY	|Q14527|[499_507]
EEEQAFKRS	|P61978|[28_36]
TENDIRVMF	|Q92879|[120_128]
KEWPQTHQA	|Q53H12|[242_250]
DMDKVLLKY	|Q02078|[61_69];|Q14814|[61_69];|Q06413|[61_69]
ELEDSTLRY	|Q15149|[653_661]
NEVEQRHTL	|P12270|[857_865]
FSDPERVNY	|Q6NXG1|[200_208]
KEMEKSFEV	|Q9UKY7|[211_219]
SEVILHHEY	|O75643|[1230_1238]
RMDYPVFTV	|Q68CR1|[282_290]
MEMPSFYSH	|P55265|[477_485]
FTDEESRVF	|Q9NYF8|[340_348]
ASEKHQHMY	|P50416|[636_644]
EEQKELQRA	|Q9Y314|[97_105]
EELRQQKEA	|Q9ULW0|[614_622]
EERQKIEEA	|Q9Y613|[744_752]
FTESQKTKY	|Q9GZR7|[801_809]
QEQRIMKEA	|Q9NV06|[405_413]
WSESHDRGY	|Q92966|[277_285]
FTQDTQPHY	|Q14204|[2784_2792]
NERLELEAY	|Q9NYB0|[91_99]
NLDSQRLQY	|Q8IX04|[320_328]
NVEKKIDKY	|P40429|[184_192]
RLLHEVQEL	|Q13561|[105_113]
REHEHVVEC	|P43034|[273_281]
MENRPVETY	|P63151|[315_323]
WVDSDQLLY	|Q9BZE1|[375_383]
TSDQQRQLY	|Q16625|[424_432]
TTEERTQLY	|Q8NBP0|[710_718]
YLDDPDLKY	|P26358|[359_367]
ALDQFQEKY	|A0AVT1|[331_339]
IEIENFKSY	|Q14683|[7_15]
FSEIDLEKY	|Q86XF0|[149_157]
LSERYAELY	|Q5T953|[48_56]
EEIDIHNEF	|Q92562|[669_677]
DIDTRSEFY	|P61160|[290_298]
KSDVNKEYY	|Q9NW64|[109_117]
YTEKDKQAY	|Q16831|[227_235]
KQQEEQTRV	|Q53EZ4|[341_349]
HTDILKEKY	|Q8N5C7|[262_270]
KTDKHVQKY	|Q15911|[1004_1012]
SEHEHFTDF	|O96005|[110_118]
KMDDLNLHY	|Q8NCJ5|[14_22]
YTDMESEDY	|Q7Z6Z7|[4143_4151]
HSDQQVFEY	|Q969X6|[545_553]
QTESQQIRY	|Q9H7F0|[131_139]
LLLEPYNKY	|P35579|[292_300]
FSEPHARFY	|P22694|[139_147];|P17612|[139_147]
PSDPKQYRY	|O43847|[107_115]
AEKYREYEA	|P0C7V9|[37_45];|A6NJ78|[37_45]
FLDNERHEV	|Q16512|[452_460]
REKEREEIA	|Q9HCD5|[302_310]
DEFGSWQEY	|Q9H0J9|[383_391]
VLEENQEHY	|P57740|[504_512]
DTEFPNFKY	|P27694|[504_512]
YTETVNHHY	|Q8WUA4|[787_795]
QEQEGWYRA	|Q9Y4H2|[130_138]
REKMFVEEV	|P49588|[511_519]
ETDENFHNY	|Q96NH3|[45_53]
FLDQNLQKY	|P15924|[1057_1065]
FLYDDNQRV	|P11388|[828_836];|Q02880|[849_857]
LLYESPERY	|Q03518|[744_752]
DENELKEFF	|Q9UN86|[343_351]
AEEERYFRA	|Q9UII2|[53_61]
ITIFEKQEY	|Q12882|[214_222]
KTDHFIFTY	|Q9Y546|[68_76]
VEIEYVEKY	|Q9GZL7|[81_89]
ETEKDFSRY	|O60306|[887_895]
KRKTYTESY	|Q96GY0|[260_268]
FSDHHENKY	|Q8TEL6|[465_473]
HEREMAEQF	|Q9UNN5|[529_537]
RTSNYIYNF	|Q7L8W6|[259_267]
KTDKHMQKY	|Q86UP3|[937_945]
RLNEKNYEL	|Q9UI12|[382_390]
KRNEHTYVH	|P49588|[19_27]
EEFKTHHEM	|Q9NYF8|[775_783]
ETDNMFNRY	|O00462|[118_126]
TRNDYVMMY	|Q96QU8|[55_63]
YISTEFNRY	|Q8N7H5|[136_144]
YTDQFSRNY	|Q07157|[1066_1074]
YSTDENFRY	|Q9BYX4|[5_13]
YTDENQHQY	|Q5HYA8|[401_409]
FLDHKTLYY	|Q92794|[600_608];|Q92993|[323_331];|Q8WYB5|[811_819];|O95251|[428_436]
EEYQSLIRY	|Q9Y3C8|[34_42]
KTDMNRHHY	|O94985|[410_418]
EEYQRIYTT	|Q09666|[119_127]
LTDYDIRFY	|P68400|[128_136];|Q8NEV1|[128_136]
KRFEKVYTH	|Q96EK5|[201_209]
ATDRWYDEY	|P50542|[180_188]
YLDYDDTRY	|Q9BVI4|[174_182]
DEHIYPYMY	|O00255|[320_328]
KTFPYQHRY	|Q8NI27|[513_521]
EEERWEWSP	|Q9UJW9|[15_23]
KYFDEHYEY	|P33552|[11_19]
QESAGSAVVA	|P51610|[1559_1568]
AADEPSSLGP	|O75381|[73_82]
SLAEGSVTSV	|P13010|[580_589]
DTDASGGLTK	|Q02952|[1716_1725]
EEGHSSTVAA	|O43148|[142_151]
GTDVAGGYSY	|Q9Y2T3|[328_337]
AENELGVVVA	|Q9Y3B2|[147_156]
LTDPDGALAK	|Q13561|[166_175]
EEISGPLTSA	|O75955|[366_375]
AEAPAPEVYA	|Q9HCC6|[165_174]
AEYLGANSVV	|Q06203|[449_458]
GTDDGKVGLY	|Q8TEQ6|[445_454]
SSEKGGMNGY	|Q86XZ4|[123_132]
AERNSNLVGA	|P02545|[278_287]
TADDPSLSLI	|P39656|[78_87]
AEAEETARTA	|Q8N163|[869_878]
ASDPNSSIFL	|P23381|[352_361]
QENGNVHAIA	|P15514|[243_252]
KVFDPVPVGV	|Q08211|[697_706]
AEEEASRAQA	|Q7Z406|[1906_1915]
STDPSVLGKY	|Q14469|[101_110]
AEETTEMVSA	|Q02952|[996_1005]
YSDHPSGGSY	|P38159|[272_281];|Q96E39|[272_281]
DEFPGSSATY	|Q6P1Q9|[173_182];|Q96IZ6|[173_182]
EEQQPATTTA	|Q9H7N4|[1038_1047]
YSDRSSGGSY	|Q14011|[151_160]
VLLKARLVPA	|Q6P995|[19_28]
LSDIGSGIRY	|O15111|[125_134]
IMDDPAGNSY	|O75312|[404_413]
AEINKSDHVA	|Q9NZJ4|[2171_2180]
AEQLAEKINA	|Q7L014|[897_906]
MEDPSGAREP	|Q96A59|[1_10]
SENGYYLATA	|Q9UMS4|[401_410]
AEEEAQRANA	|P35579|[1882_1891]
REQEARGTAA	|Q8N1B4|[210_219]
TLTEEGVIKV	|Q9BZE4|[322_331]
AEDRQVSITA	|O75153|[244_253]
GVYDGEEHSV	|O15479|[231_240]
ATDVAKGMHY	|Q9NYL2|[111_120]
RLDPATGSLY	|Q14517|[1506_1515]
TLITDGMRSV	|Q10570|[348_357]
MESHAIGKKP	|Q92966|[159_168]
RLPDDDPTAV	|Q9UBF2|[708_717]
AEENALQQKA	|P15924|[1270_1279]
YGDDPSTNSF	|Q9BRR3|[175_184]
GTDGGRYDVY	|Q9Y6Y8|[313_322]
ASEASRLAHY	|Q96A08|[76_85];|Q8N257|[75_84];|Q99880|[75_84]
SSDNATLTHY	|Q5VWN6|[1661_1670]
RLQEDPPVGV	|P63146|[15_24]
FSDPGQPMSF	|Q99733|[195_204]
SSDTSHTSKY	|O15055|[1093_1102]
QSDPTQSGMY	|O60381|[66_75]
VTDGPGNYKY	|O75882|[145_154]
SSDNSGQTRY	|A5YM69|[173_182];|Q12774|[173_182]
PSYGGQQQSY	|P35637|[134_143]
SEEEPPKKTA	|P35659|[251_260]
SSDKSGMIEY	|Q96BP3|[240_249]
RVDPIGPLSY	|Q8TDJ6|[729_738]
ASDDFDQASY	|Q86SQ0|[350_359]
SVDPHGFISY	|Q3ZCQ8|[207_216]
AEAKEYVIKA	|Q7KZ85|[735_744]
AEMEHGLHEA	|Q70EL1|[1374_1383]
EEQHQLAVTA	|Q14152|[547_556]
SVDPDAECKY	|Q5XXA6|[42_51]
PSDLTVGQFY	|O95166|[52_61];|Q9H0R8|[52_61]
QSDMGREAAY	|Q9NX00|[91_100]
TVDDPYATFV	|P23528|[63_72]
NEDPKDRPSA	|Q96KB5|[302_311]
FSDAGPHVHY	|O95750|[27_36]
AEEDLAQQRA	|Q15149|[2434_2443]
YLTNEGIAHL	|Q15149|[73_82]
AEHNDLQYAA	|P41091|[323_332];|Q2VIR3|[323_332]
AERDALNIET	|P07355|[35_44];|A6NMY6|[35_44]
RLIDDMVAQA	|O75874|[249_258]
TLAELQNNMV	|O95235|[788_797]
EEQASRQISS	|Q99661|[711_720]
SLFEKGLKNV	|Q9UKA1|[90_99]
LTDPIQGTEY	|Q9UDY8|[560_569]
EEEVASHHEA	|Q53GS7|[489_498]
AEARHQQVQA	|Q5T9S5|[1151_1160]
LTDITKGVQY	|P13639|[662_671]
EEHQSGFFSA	|Q5T2E6|[264_273]
AEDYGEHHLA	|Q6P1M3|[856_865]
ALWEDEGVRA	|Q5JWF2|[795_804];|P63092|[152_161]
EEIEVDSRVA	|Q14978|[631_640]
FSSSHEGFSY	|P41161|[318_327]
DLDHSIGTQY	|O94842|[107_116]
KEIDAYIVQA	|Q9H6H4|[101_110]
REAEFTKSIA	|Q15005|[185_194]
ASDALDKIRY	|Q58FF7|[47_56];|Q58FF8|[47_56];|Q58FF6|[23_32];|P08238|[47_56]
AEYDLTTRIA	|P60228|[2_11]
RTENGGQVMY	|P22415|[52_61]
NSELGSETRY	|Q9H869|[417_426]
ETDRGMSAEY	|Q9Y512|[206_215]
LSDFESGLKY	|O75691|[1417_1426]
AEERDKRLAA	|Q8TD47|[249_258];|P62701|[249_258]
MEQSPDMHNA	|P35716|[68_77];|Q06945|[78_87]
FSDPVYAEAY	|P53618|[722_731]
VTEDGNQHVY	|Q8WU10|[98_107]
EERSPSWISA	|Q02952|[907_916]
AENQSHDYKA	|Q5UIP0|[1597_1606]
RVDPAKGLFY	|O75643|[666_675]
AERDYLDLTA	|Q9NYU2|[702_711]
QEQIEAIHKA	|Q15459|[523_532]
TSDDPWLTAY	|Q9Y263|[422_431]
RMFDGKFVVA	|Q8TAS1|[392_401]
PTDNQIKARK	|P15559|[265_274]
AEEDMPQRVV	|Q14676|[431_440]
EEDQGSKLIR	|Q9Y241|[13_22]
LLDTPVKTQY	|Q6N021|[1119_1128]
TVDPASLWEY	|Q16658|[484_493]
VTDQNKIVTY	|Q15054|[14_23]
MEVEVDGQKF	|Q12906|[557_566];|Q96SI9|[543_552]
YVDEASKKEI	|P62249|[99_108]
ATDSYKVTHY	|P43490|[14_23]
VTDKSMVDKY	|Q5VYK3|[1150_1159]
ISQSGDFLRY	|O95302|[274_283]
VTDKFTESVY	|Q96FH0|[13_22]
DTEVGHVIRY	|Q14517|[2093_2102]
ETDHINQIGY	|Q9ULK4|[799_808]
SSDKGRLCYY	|Q53GS7|[16_25]
LLDQGQLNKY	|Q00610|[421_430]
LTELLKQGQY	|P25705|[467_476]
ESEVNRGDKY	|P33176|[20_29]
ATDISRQNEY	|Q13946|[320_329]
NEYGSINHTY	|P11362|[234_243];|P21802|[235_244]
TSDDVKEQIY	|P62277|[29_38]
YTDHQNSSSY	|P48436|[442_451]
DEVQVVRGHY	|P61254|[53_62];|Q9UNX3|[53_62]
EEQKELQRAA	|Q9Y314|[97_106]
YSYPTGNHTY	|P49023|[31_40]
ITDPDPDIRY	|P42345|[664_673]
AERDLQHHEA	|Q9H0I3|[122_131]
KSDSGKPYYY	|O75400|[191_200]
LIDADPYLKY	|P20248|[341_350]
LSEKPPYSKY	|Q86SQ0|[142_151]
EEIHRKLSEA	|Q13098|[92_101]
TSDLQDKNEY	|Q8NFH4|[108_117]
DEARVQYEGF	|Q14692|[871_880]
TTESQELSRY	|P42695|[675_684]
VFSEPRAVFY	|Q16513|[753_762]
QTDQMVFNAY	|Q8WUX9|[316_325]
YEVEIDGKTY	|P50579|[311_320]
STEEARFLTY	|Q13490|[182_191]
YTFGTKEPLY	|O43809|[45_54]
REEWHGHVTA	|P61599|[67_76]
KSDTGKPYYY	|Q6NWY9|[143_152]
REIDDYIVQA	|Q6NUK4|[101_110]
VSWDGNPERY	|O60487|[95_104]
ATEDPWKTNY	|P10768|[109_118]
LSEINKPNFY	|Q5QJE6|[252_261]
PLDHLKPLEY	|Q14146|[1354_1363]
FTDVNSILRY	|P07814|[48_57]
YTDHGSDHHY	|Q9Y580|[219_228]
NTDHQTQLLY	|Q06609|[196_205]
EEVLIPDQKY	|Q9UKT7|[394_403]
AEMEMKNRQV	|Q9BZJ0|[283_292]
FTDEEGYGRY	|Q12874|[130_139]
SEDEKQQYLP	|Q29RF7|[59_68]
TSDFSRFTNY	|O96020|[81_90]
VSDSKQFTYY	|Q00653|[317_326]
KSDHTDVLYY	|Q5T5J6|[56_65]
MMDPNSTQRY	|Q9HAV4|[20_29]
NTDPWAGYRY	|P53582|[74_83]
FTDEESRVFL	|Q9NYF8|[340_349]
SSENPWMTEY	|Q6IQ19|[253_262]
FLDESRSTQY	|Q9Y230|[433_442]
IQRTPKIQVY	|P61769|[21_30]
EEEKEKERVA	|Q15459|[261_270]
STDKFKTDFY	|Q7L5N1|[271_280]
ETEDPNDNRY	|P13637|[484_493]
LTDIFQHDTY	|Q96BQ5|[209_218]
QTDLHEHPLY	|Q96P11|[194_203];|Q63ZY6|[10_19]
QEQQHRQTEA	|Q8NI77|[562_571]
KEEDFKRMTA	|P50416|[195_204]
EEQPQDERKP	|Q96EI5|[21_30]
HTDDPLTWDY	|Q9NYH9|[267_276]
LTDVREQNKY	|Q96QE3|[1663_1672]
AIDHNQMFQY	|Q96RQ1|[240_249]
IDSQRVWAEY	|Q6P2Q9|[1380_1389]
LTDEGYEHFY	|O43847|[509_518]
KMYEEFLSKV	|P31321|[244_253];|P10644|[244_253]
VTDNRYKSKY	|Q9BTC0|[716_725]
TTEESLRNYY	|P22626|[32_41]
HVDDQGRQYY	|Q8IWW6|[367_376]
YTDVPFHNQY	|O95897|[405_414]
QELQEINRVY	|P07355|[138_147];|A6NMY6|[138_147]
NEEHFRGQEF	|Q99707|[47_56]
LTEVDNYHFY	|Q16236|[220_229]
YVDDASWMRY	|Q12789|[879_888]
YLSERYAELY	|Q5T953|[47_56]
DSDFRKDDFY	|Q9HBM0|[553_562]
EEQQQRHWVA	|Q8IU81|[398_407]
FMEKETPLRY	|Q2PZI1|[397_406]
YTETEPYHNY	|Q86VM9|[392_401]
FMDPEMETRY	|O60266|[615_624]
YSDFPFHEDY	|P31512|[69_78]
ETDEKDFYLY	|Q9GZR7|[571_580]
YTSYPMHDFY	|Q86XK2|[842_851]
ETEEGIYWRY	|Q8NCW0|[104_113]
FTEKEVQQWY	|P62166|[22_31]
YSDKYFDEHY	|P33552|[8_17]
WSQHYHQGYY	|Q00839|[816_825]
ETEREYFNRY	|Q7Z6E9|[790_799]
AEVEGLGKGVA	|Q15149|[1168_1178]
AEASASAAYKA	|Q96T58|[2182_2192]
ALGTDAEGQKV	|O00186|[373_383]
AEKIASIGQTA	|Q6ULP2|[773_783]
AEAHAQAKAQA	|Q15149|[1513_1523]
ASETAGSGFLY	|Q8NFA0|[471_481]
ASISSGTHGQY	|O15056|[1126_1136]
AEQAEADKKAA	|P09493|[22_32]
AEAESAQTRVA	|O43823|[658_668]
QEHMSISGSSA	|Q9UHX1|[437_447]
TSDNGKDGLAY	|Q9UM11|[81_91]
AEPDANQKAEA	|Q96T58|[1783_1793]
RESTGAQVQVA	|P57721|[156_166];|Q15365|[124_134];|Q15366|[124_134]
VTDGAILGKLY	|Q8NEZ4|[1500_1510]
SEQSVAISRCA	|P41134|[36_46]
PVPPLPEYGGK	|P24539|[43_53]
AEAPHLVHVDA	|P35475|[26_36]
AESIANQRITA	|Q06265|[285_295]
AEAETARQETA	|O75674|[158_168]
AEEEETSIKAA	|O15213|[137_147]
AEMQGKSAREA	|Q9UH99|[497_507]
AEAYADLVKQA	|P51784|[359_369]
VSEGTKAVTKY	|Q96A08|[113_123];|Q99877|[112_122];|O60814|[112_122];|Q8N257|[112_122];|P33778|[112_122];|P58876|[112_122];|P06899|[112_122];|Q99879|[112_122];|Q5QNW6|[112_122];|P62807|[112_122];|Q99880|[112_122];|Q16778|[112_122];|P57053|[112_122];|Q93079|[112_122];|P23527|[112_122]
EADPLVGWSLP	|P35475|[299_309]
YSSAQGGSQHY	|O75177|[198_208]
NSDDELSGKGY	|P82094|[343_353]
VTIEDVQKLAA	|Q9Y617|[349_359]
SSDPFLNSGTY	|P46937|[381_391]
AEEENKAKAEA	|Q02790|[419_429]
ITDRGGGSQHY	|Q9NWH9|[937_947]
EENASQSTVKV	|Q12905|[212_222]
LSIPTSPTSKY	|Q9NWS1|[149_159]
IEYPTGSGNVY	|Q9H1B7|[421_431]
VSSTSEIGTRY	|Q9H2Y7|[1475_1485]
FLDASGAKLDY	|Q7L1Q6|[53_63]
AERDALNIETA	|P07355|[35_45];|A6NMY6|[35_45]
RLGEAEGLMKV	|Q9HBR0|[413_423]
DEHGIDPTGTY	|P07437|[26_36];|P68371|[26_36];|P04350|[26_36]
TSDKDGNTHAY	|Q9ULD2|[19_29]
GSDNSVEHSDY	|P40424|[140_150]
FSDGTHGGLRY	|P58107|[438_448]
KTDSTGTHSLY	|O60292|[676_686];|O43166|[664_674];|Q9P2F8|[660_670];|Q96FS4|[386_396]
FTDPGMGNLTY	|O75096|[1754_1764]
SLADDSVLERL	|Q9NU22|[1471_1481]
KLLDPSTPVHI	|Q9NXF7|[79_89]
TTDFPGNYSGY	|O15160|[26_36]
MEQQSISISKA	|P49736|[604_614]
KEATYGERVVA	|P31350|[217_227]
LTEVNKAGTQY	|P50453|[74_84]
EENRESGMTTA	|Q5VZ89|[1022_1032]
NTDASGKIEKY	|Q9UHB6|[180_190]
VTESPAKFALY	|Q86WH2|[134_144]
VSEDSSVTQIY	|P04844|[116_126]
LLIDDKGTIKL	|P06493|[134_144]
AEQDPDELNKA	|Q6PJE2|[127_137];|P21754|[289_299]
MEEMHQVAIAA	|Q9BW27|[113_123]
SLDGDLAGRYY	|P12277|[164_174]
LTEAGDYTAKY	|Q8IW92|[348_358]
EEENADNNTKA	|P02786|[44_54]
DEELLGDGHSY	|P28070|[118_128]
EEQSAGNYRNA	|Q8NEZ3|[1115_1125]
EEEKASKEFAA	|O75554|[57_67]
GLIDIENPNRV	|Q13442|[79_89]
DTSRPLGDSMY	|Q14596|[741_751]
ITDEEATKSSY	|P08237|[145_155]
LLWDPSTGKQV	|Q9NVX2|[181_191]
YEAGHLSFYSA	|Q96F44|[410_420]
KLADDVDLEQV	|P55072|[389_399]
KLIGDPNLEFV	|P62826|[167_177]
FLASESLIKQI	|P62906|[110_120]
SESETVNKERA	|Q86XL3|[288_298]
SEVNRGDKYIA	|P33176|[21_31]
LTEVNKTGTQY	|P35237|[76_86]
RLFDDSTVTTV	|O94966|[1186_1196]
SEQLDLPVRQA	|O95373|[45_55]
QEQRLQGEVVA	|Q3MHD2|[21_31]
TSEDISQTSKY	|O94929|[461_471]
AEKDDDLKRTA	|Q13439|[2046_2056]
IQDNHDGTYTV	|P21333|[1596_1606]
RLWDLTTGTTT	|P63244|[88_98]
VVDGNRQEDAY	|O00219|[121_131]
DSYSSSRSDLY	|P38159|[325_335];|Q96E39|[325_335]
DLDLESPKSLY	|O94916|[12_22]
PTDSLNNDNKY	|Q9UPT9|[453_463]
STFDHPELVKL	|P78371|[333_343]
NEQQSVLQRIA	|Q14683|[1011_1021]
KEQENRKGLIA	|Q99497|[93_103]
STDKASMEVRY	|Q8NCD3|[608_618]
AEEKLTHKMEA	|P16949|[97_107]
FLLDPVKGERL	|Q15149|[3869_3879]
FQDMMGHGSDY	|P12956|[131_141]
VTEFEDIKSGY	|P0DME0|[135_145];|Q01105|[125_135]
TTDLFGRDLSY	|P52597|[256_266]
SSDTADFRDLY	|P81408|[500_510]
YQDPLDPTRSV	|Q8NI35|[703_713]
NTSDMMGRMSY	|O14497|[1216_1226]
TIDDPTKQTKF	|Q96RF0|[279_289]
QLEDGRTLSDY	|P62987|[49_59];|P62979|[49_59];|P0CG47|[49_59];|P0CG48|[49_59]
PTEPYLSSQNY	|Q6P2Q9|[1758_1768]
HLDTTGTYTQY	|P16144|[289_299]
AEQEREDRQAA	|Q03169|[159_169]
YLPDIIKDQKA	|O15355|[74_84]
LSDDHGASWRY	|Q99519|[232_242]
REKEFKAKEAA	|O75348|[51_61]
MEEMYKKAHAA	|P46777|[236_246]
AEQLEDKKRKA	|O95394|[391_401]
YFFTSVSRPGR	|P04439|[31_41];|P30499|[31_41];|P30443|[31_41];|P01892|[31_41];|P30455|[31_41];|P10314|[31_41];|P30459|[31_41];|Q09160|[31_41]
KMWDPHNDPNA	|P08621|[87_97]
QEHKTDEMHTA	|Q8IWZ3|[398_408];|O75179|[427_437]
ELDPMAMTQKY	|Q13435|[834_844]
TVDEYKIGQLY	|Q9UKF7|[13_23]
QEQAQTTDWRA	|Q9BZM1|[23_33]
HIDEQSGKEKY	|O14802|[1213_1223]
QQLDSKFLEQV	|P42224|[8_18]
SEEDRVVVIRF	|P83876|[20_30]
FTDEEGYGRYL	|Q12874|[130_140]
FIDHDITSQLY	|Q96DN5|[560_570]
ETDLLDIRSEY	|P50995|[463_473]
YSDDGQKWTVY	|Q96PD2|[385_395]
LTDDHVQFLIY	|Q16539|[122_132]
YTDHQNSSSYY	|P48436|[442_452]
NLSKEDDVRQY	|P62753|[146_156]
YIDPETKKFEP	|Q9NYC9|[2421_2431]
TSDHFETIMKY	|P07814|[269_279]
ASDKETYELRY	|Q6P5R6|[98_108]
LSDTKYLEMIY	|O95373|[709_719]
YSDVGRYIDHY	|Q9UK99|[83_93]
NSDTNIRWNNY	|O43422|[452_462]
QEQEKQQKVEF	|O75391|[38_48]
KMDDPDYWRTV	|Q14137|[175_185]
YSEYPPFSHRY	|Q96BY9|[204_214]
IIYDRDFSYNY	|P23921|[135_145]
LLLDVPTAAVQA	|P13284|[15_26]
GTDNPLSGGDQY	|P13010|[63_74]
YSHAAGQGTGLY	|P48436|[452_463]
ASENNGGEGIHY	|P78527|[2173_2184]
YSERVGAGAPVY	|Q7L7L0|[40_51];|P04908|[40_51];|P20671|[40_51]
YSDPSTGEPATY	|Q15149|[3318_3329]
QSESETAGSTKY	|Q93008|[1852_1863]
GDALDALGLKRY	|P62875|[32_43]
SVSRPEGDTGKY	|O43286|[313_324]
GTEIDGRSISLY	|P19338|[451_462]
VSAKEALETDLY	|Q13426|[166_177]
DTDARFGHGSDY	|Q9NWH9|[750_761]
AEQEPELEARVA	|Q96RY7|[839_850]
MTDVDRNGTTAY	|P16070|[344_355]
TTEDAQAAVDYY	|P43243|[443_454]
ATEQVGQHKDAY	|Q9BZZ5|[17_28]
PTDNPEAHSNLY	|Q12851|[800_811]
SSDSSKRTFSVY	|Q9UID3|[640_651]
GTEFPNPLISKY	|Q3T8J9|[843_854]
NTEDSSMSGYLY	|Q6ZV73|[1330_1341]
VTEDALIRTVSY	|Q6L8Q7|[289_300]
LVDIVKGTNSYY	|P09874|[559_570]
LSELSNPEISKY	|Q9Y485|[783_794]
TMDLDHSIGTQY	|O94842|[105_116]
ALWHDAENQTVV	|Q12769|[408_419]
FTEAGLKELSEY	|Q7L1Q6|[233_244]
YTDAPPAYSELY	|Q15038|[35_46]
YLDRGTGNVSFY	|Q9C037|[449_460]
YTEMTGKLISSY	|Q96SK2|[44_55]
TVSREDGSFSFY	|Q15155|[271_282];|P69849|[271_282];|Q5JPE7|[271_282]
ASEDATIKVWDY	|P43034|[126_137]
RSEDPDTSMDSY	|P50416|[428_439]
DSELQREGVSHY	|Q969N2|[55_66]
FSENLQPHISSY	|Q8TEX9|[421_432]
ILYSDDGQKWTV	|Q96PD2|[383_394]
QTDPDVHRNGKY	|Q8TBZ0|[270_281]
YTDHGSDHHYRG	|Q9Y580|[219_230]
YVDPSTDERLSY	|Q15149|[3983_3994]
NSDEQKITEMVY	|P50851|[880_891]
HSFPYDYSASEY	|O00767|[302_313]
RTEKEEKLSQAY	|Q3MHD2|[92_103]
YLEHGEYEGNLY	|Q14168|[440_451];|Q9NZW5|[404_415]
LTEPVKDHNWRY	|O95361|[119_130]
YLDEAEREKQQY	|Q9P0W2|[119_130]
YSDKYFDEHYEY	|P33552|[8_19]
QEGGGGVAA	|Q16690|[77_85]
AIAGAPVTV	|Q86TI2|[750_758]
KEAAGTTAA	|O43290|[11_19]
GVGPVPARA	|Q8TB96|[25_33]
GLLIGTTGV	|O14544|[287_295]
NESPGAPPA	|P49796|[1042_1050]
AEEGPPLGA	|Q969S3|[240_248]
SEAKPAAVA	|Q9Y490|[1898_1906]
MVAPAVASV	|P05412|[142_150]
SEGGKTPVA	|Q70UQ0|[24_32]
AASSPVTTL	|P30305|[47_55]
AESKASLAA	|Q14149|[160_168]
AEVDAAMAA	|P22626|[73_81]
AEALGSTEA	|P78347|[479_487]
SESTAVGQA	|Q02952|[1618_1626]
QEVAGSTSA	|Q8IYL3|[30_38]
AERGPPASA	|Q6PCB0|[22_30]
AEAAHGTVT	|O75874|[305_313];|P48735|[344_352]
AGDSPGSQF	|Q12778|[284_292]
SEAGPGPRP	|P52701|[51_59]
VVDEGPTGV	|O15427|[5_13]
SEAEPGRGA	|A6NGR9|[65_73]
AEAVESAQA	|Q14566|[230_238]
AEAGFLAEA	|P29401|[87_95]
AVDGSGTKF	|Q9GZL7|[196_204]
SGDTGVIHV	|Q92542|[67_75]
LMAPAPSTV	|Q13118|[109_117]
AEAIIRSGA	|Q5SW79|[1181_1189]
SSDPKGGKL	|Q6R327|[1112_1120]
AEVEAGKDA	|Q9UD57|[51_59]
EEAPAAMTA	|Q13428|[621_629]
GEMSSSHSA	|O15350|[464_472]
SESASQLTA	|Q5SVZ6|[54_62]
GLYSGVTTV	|P23921|[46_54]
NEKPAAVVA	|Q9HB71|[57_65]
KLGSVPVTV	|Q9Y4C2|[623_631]
ARAMDPVAA	|Q8TDR2|[170_178]
RETGSIAAP	|Q05BQ5|[471_479]
ALLGDLTKA	|O14787|[686_694];|Q92973|[697_705]
AEKAGKVEA	|Q9NTJ3|[874_882]
VGDPSTTNL	|O15042|[268_276]
TEVAPPPPP	|Q14839|[244_252]
DMVGAGREA	|Q9H3P2|[263_271]
AELEKSSAA	|O75330|[425_433]
LLPEGPPAI	|Q15011|[381_389]
EESGITNSA	|Q99459|[325_333]
AESPGRPPP	|Q63HR2|[525_533]
SLFGGSVKL	|Q8WUM4|[103_111]
LLAEPVPGI	|P61088|[15_23];|Q5JXB2|[15_23]
ILGPKPQGV	|Q8NHS3|[444_452]
AADEPVTVL	|Q14118|[183_191]
AEQLAQIAA	|P52565|[8_16]
EERPGAEGA	|Q9H3P7|[24_32]
MTDKAPPGV	|Q7Z7J9|[70_78]
EEGHSSTVA	|O43148|[142_150]
AESPASRQA	|Q86YP4|[338_346]
AEKGKEIAA	|Q2LD37|[1812_1820]
AENGPSQKS	|Q9UJM3|[82_90]
KENGNIATA	|Q9C0D6|[13_21]
AEQAVSRSA	|Q9H939|[154_162]
AEQATTVKA	|Q2NL68|[358_366]
SADFPALVV	|P22102|[139_147]
AEHSFSNGA	|Q8TD26|[2146_2154]
SADDSPSQL	|O43524|[280_288]
AEDRGTLSA	|P78316|[150_158]
AETSRALTA	|Q86Y13|[854_862]
SIYPSPTGV	|Q6P2Q9|[1693_1701]
AEAVFASEV	|P22087|[275_283];|A6NHQ2|[287_295]
DEHAGVISV	|O43504|[39_47]
AIVDKVPSV	|Q9Y678|[147_155]
SEMRAPPAA	|P17480|[546_554]
MEVELPAAA	|Q99661|[129_137]
AEKDPGRSA	|Q9H7S9|[122_130]
SESPVITKA	|Q12830|[1229_1237]
HIDFGGTSV	|Q6ZMT4|[282_290];|Q8NHM5|[242_250];|Q9UPP1|[283_291]
AESAQTRVA	|O43823|[660_668]
SVDDTIVAL	|P52948|[683_691]
AEQSKVLSA	|Q96LD4|[226_234]
IVGPDGLVY	|P22087|[180_188]
ASDDGTVRI	|Q9H7D7|[632_640]
EEIKSGTTA	|Q9NU22|[5210_5218]
AEVIQAFSA	|Q99622|[21_29]
MLPPPPLTA	|P18858|[393_401]
AVDDGVNTF	|P50990|[391_399]
VSDFGGRSL	|P27694|[383_391]
AEAVRPHSA	|Q8NE01|[107_115]
AEHPKPSAC	|P46527|[21_29]
ALSDGVHKI	|Q9NVQ4|[11_19]
SMMPPPPAL	|Q9NQB0|[547_555]
YTPPPPPTA	|Q9BUJ2|[797_805]
ALSDSIHTV	|Q9UKN5|[284_292]
REGSHSVTA	|P55771|[330_338]
GLIGQLDEV	|Q9UL15|[312_320]
TLAEEVVAL	|O95714|[2141_2149];|Q9BVR0|[854_862]
ASDPDEAKL	|Q13045|[1108_1116]
REIAGSLEA	|Q14746|[391_399]
NSDGYGGNY	|O15523|[642_650];|O00571|[644_652]
REDSKGLAA	|P53814|[142_150]
SQLSITQVA	|Q9UJF2|[736_744]
SEQMASHSA	|P00519|[1047_1055]
AEDDLNTVA	|Q5SRD1|[151_159];|O14925|[151_159]
AESAETRIA	|Q53H54|[396_404]
TLTGKTITL	|P62987|[7_15];|P62979|[7_15];|P0CG47|[7_15];|P0CG48|[7_15]
TSDKPGSPY	|O60488|[51_59]
MAPPPPRSV	|Q75N03|[269_277]
ASELKALGY	|Q12996|[538_546]
DNGKDGLAY	|Q9UM11|[83_91]
EESVFAVTA	|P57740|[236_244]
QEAAAKHEA	|Q14764|[669_677]
ATDPTIHTV	|Q9H6U8|[450_458]
LEDVSKPPA	|O15417|[1012_1020]
AENRPAVKA	|Q13488|[423_431]
SSDRKGGSY	|P04439|[336_344];|P30443|[336_344];|P01892|[336_344];|P13746|[336_344];|P30447|[336_344];|P18462|[336_344];|P16190|[336_344];|P30455|[336_344];|P30457|[336_344];|P01891|[336_344];|P30450|[336_344];|P16188|[336_344];|P10314|[336_344];|P30456|[336_344];|P10316|[336_344];|P05534|[336_344];|P30512|[336_344];|P16189|[336_344];|P30453|[336_344];|P30459|[336_344];|P01893|[336_344]
TEALHFVAA	|P07199|[362_370]
SLADIAQKL	|O43242|[418_426]
SEHDQAMAA	|Q13042|[348_356]
REDDPGEAA	|P57740|[142_150]
SEKEATPVV	|Q9Y520|[636_644]
ILTDITKGV	|P13639|[661_669]
SEADKIKVA	|P12268|[432_440]
AEQNSNTTP	|Q6VMQ6|[922_930]
VLDDSTAKL	|Q9P219|[854_862]
ALFNGAQKL	|P61619|[110_118];|Q9H9S3|[110_118]
AEQKSVETA	|Q01432|[64_72]
AEKEKTVSA	|Q6PID6|[219_227]
TSDLGKTEL	|Q5SVZ6|[293_301]
VGDTQVVVF	|P50990|[355_363]
MESDDARAA	|Q96C90|[103_111]
TEQPPSPLP	|Q92545|[1370_1378]
EESSSHHGP	|O60884|[397_405]
DEEGKGAVY	|P20618|[142_150]
IADPDQPVL	|Q8NBP0|[575_583]
AMDPVSVSY	|P57682|[13_21]
SLLDPVPEV	|Q92616|[1665_1673]
YEKDSSVAA	|O43809|[54_62]
VEVPETPKA	|Q9UNF1|[37_45]
GQIEVVPEV	|Q92576|[205_213]
VIAEILRGV	|O00567|[117_125]
SEEFPSFGA	|Q00341|[1247_1255]
AELQRLVAA	|Q9Y5J9|[10_18]
SSDKITTGY	|Q96T68|[321_329]
REEEGALAP	|Q9Y6Q5|[40_48]
AEDLNLLIA	|Q16531|[26_34]
AEVDKLRAA	|Q9UDT6|[576_584]
LLAAWTARA	|P05067|[9_17]
AEKADCHEA	|Q8IY37|[1111_1119]
AETDTPNRA	|P04035|[405_413]
LEGPPLDAY	|Q15365|[214_222]
GSLEELVLD	|Q8ND23|[243_251]
KLAESVEKA	|Q9Y5B9|[216_224]
AECPRAEEA	|O15031|[499_507]
HEMTKTASA	|Q9Y5U8|[101_109]
SEQTRVNAA	|P46776|[83_91]
EENGTVKKA	|Q8N9B8|[153_161]
YTSDSPGSY	|Q96RE7|[270_278]
TDSAGHILY	|P49755|[77_85]
HLIEPLANA	|Q9Y490|[1711_1719]
AEQRSPPPP	|Q6NT89|[18_26]
VSDPSSPQY	|O14773|[68_76]
AEESRTNAC	|Q5EE01|[55_63]
AEHGIFLPP	|P57076|[52_60]
NEIDTTPPP	|Q15047|[695_703]
ISDLGQHTL	|P39656|[164_172]
KILPTLEAV	|Q12905|[127_135]
SEHPFVNGV	|Q01850|[263_271]
QEGVEVRVA	|Q8NBZ7|[248_256]
AATEIVERV	|Q9UID3|[394_402]
YLPPATQVV	|P38919|[207_215]
SEHSDLTEA	|Q70EK8|[253_261]
EEQVQASTP	|Q14137|[99_107]
HSDPSILGY	|O75420|[1012_1020]
LEGPPLEAY	|Q15366|[222_230]
AETELQRAA	|A1XBS5|[147_155]
KQVSDLISV	|P17844|[451_459]
TEQEPSTTP	|Q10570|[555_563]
EEIQGTKDA	|Q8WX93|[895_903]
AEESSKIRA	|P08240|[124_132]
RMSDVVKGV	|Q71RC2|[503_511]
IIDDSDSNL	|P49792|[721_729];|P0DJD1|[720_728];|P0DJD0|[712_720]
AEFAERTVA	|P67936|[203_211]
HVDHGKSTL	|P13639|[27_35];|Q8N442|[76_84]
SSEGTQHSY	|P13797|[113_121];|Q14651|[112_120]
SLAKIYTEA	|Q92522|[66_74]
NEFQGAEAM	|P35790|[169_177]
YSDDDVPSV	|Q6PL18|[750_758]
EETTEMVSA	|Q02952|[997_1005]
EESVPVSSY	|Q7Z695|[403_411]
ATDIDKNGY	|P06756|[441_449]
VDRNGTTAY	|P16070|[347_355]
VEEEPRPAA	|O43491|[777_785]
KLISDINKA	|Q01082|[387_395]
SERHGFEAA	|P35580|[40_48]
TELEQPVGM	|P18583|[511_519]
EEQVTKAEA	|Q9NUP1|[153_161]
ISEQTGKEL	|P53396|[6_14]
EEINSELTA	|Q9Y2K3|[942_950]
ASELESLEK	|O14777|[529_537]
AEQLRGFNA	|Q13751|[836_844]
VILPTVHEV	|Q8IWF6|[261_269]
KEYDGVVVV	|P03923|[107_115]
HLDPAVKEV	|O60508|[71_79]
SSDANPVRY	|Q9NU22|[130_138]
ARFGHGSDY	|Q9NWH9|[753_761]
TEEASHHEA	|Q92599|[71_79]
SEKNEDFAA	|Q02952|[1458_1466]
SIDKTGENF	|P62701|[91_99]
REANFTVSS	|P38919|[298_306]
KILPDLNTV	|O60287|[503_511]
RSPDFASSF	|Q99828|[179_187]
NLDNPIQTV	|Q15155|[1082_1090];|P69849|[1082_1090];|Q5JPE7|[1082_1090]
YIQPQPLGV	|P51648|[96_104]
ALADIVWRA	|Q4G0A6|[498_506]
RIIDTVAQV	|Q9UKK3|[631_639]
EERENVAVA	|Q6IQ49|[360_368]
EEQSRLIAA	|Q9UKG1|[664_672]
QLEDGRTLS	|P62987|[49_57];|P62979|[49_57];|P0CG47|[49_57];|P0CG48|[49_57]
SESQVHMMA	|Q02952|[885_893]
EEHTAVYTA	|Q562E7|[934_942]
SEKLEQSEA	|Q92905|[270_278]
FSEETPVVL	|O75787|[117_125]
LLAEQGYEV	|Q9UBV2|[580_588]
ATETQPIVY	|Q00610|[1626_1634]
HENPDIIIA	|Q8TDD1|[214_222]
ALDEVFTKV	|Q9UMX5|[124_132]
SADPDNLKY	|Q96Q15|[36_44]
AMNARPHKV	|P09651|[71_79]
VDMPITVSY	|Q2TAL8|[250_258]
EEKADYVTA	|Q9BWW8|[158_166]
RLPETLPSL	|P37088|[262_270]
TTDKKSLAY	|Q16513|[73_81]
REKQEAAVP	|Q14644|[329_337]
KLAEIVKQV	|Q8IW41|[454_462]
YTAQPTQGY	|Q01844|[21_29]
SSDKGRLCY	|Q53GS7|[16_24]
AEAKFFTES	|Q7KZF4|[246_254]
VIDPVAPRY	|P07814|[499_507]
RLNNKSAKV	|O75533|[939_947]
DEHEGPALY	|P49721|[108_116]
MEQRGQNAP	|O14763|[1_9]
KLDNQVSKV	|Q9Y2D8|[355_363]
KEIAENQEA	|Q13625|[180_188]
KEADKLEQA	|Q8IUR0|[100_108]
NSEKYGDGY	|Q5BKZ1|[300_308]
RLDDVSNDV	|Q86Y56|[751_759]
TENQNNKSV	|Q9BQI3|[297_305]
LDHSIGTQY	|O94842|[108_116]
RLMNETTAV	|P34932|[169_177];|O95757|[169_177]
READFARVA	|Q8WUY1|[72_80]
RTDPVVADY	|P37231|[85_93]
REHLNPQAA	|Q9Y4A5|[2302_2310]
QSELVGQLY	|O00429|[683_691]
ALDTKIGRY	|O60264|[920_928]
ALNELLQHV	|Q9Y490|[777_785]
NIDPITMAY	|Q9UJM3|[46_54]
QEAVRQHVA	|Q14667|[1818_1826]
SEAEKVYIV	|Q15024|[7_15]
EEQGDHARP	|Q9BRS2|[512_520]
SERDPIQPP	|O94966|[903_911]
PTDKHTLVK	|Q01814|[793_801];|P20020|[770_778];|Q16720|[767_775];|P23634|[758_766]
ATELKNNSY	|O15371|[422_430]
HLTDITLKV	|Q15046|[120_128]
QETSFTKEA	|P13693|[79_87];|Q56UQ5|[84_92]
EVDPIGHLY	|P43357|[168_176]
AESDVKHRT	|P49642|[372_380]
EEEAKTHEA	|P35579|[1177_1185]
SEAEIFYNA	|Q9Y446|[470_478]
AEHFSIIRA	|Q86XN8|[244_252]
TESSDITEY	|Q9H7X7|[24_32]
AEEERRIAA	|P56385|[37_45]
NKQDAVKEL	|Q5TAH2|[780_788]
SESRFFVSS	|P35613|[270_278]
RESNNMVVP	|Q9Y6X3|[516_524]
LLDRFLATV	|Q14094|[72_80]
AEKKDQMKA	|Q13045|[867_875]
AEQESQMRA	|O00258|[43_51]
VTNESPLKY	|Q05086|[740_748]
NETLIVSKF	|Q9BQA1|[111_119]
KMNESTRSV	|P33991|[578_586]
KENAYDLEA	|Q9UBQ5|[38_46]
QIDTGENLY	|Q14586|[372_380]
LLQEPPRTV	|Q96IZ0|[214_222]
IIIPEIQKV	|P55060|[825_833]
RELNNVHTA	|Q9HBM0|[421_429]
RLPEAIEEV	|Q9UBQ7|[125_133]
KIDDKPVKI	|Q15005|[40_48]
IIDNSQGFY	|Q9Y617|[281_289]
AEIEHFVDP	|P41250|[349_357]
AEHRIDFVA	|P49585|[159_167]
KIVDFSYSV	|O60566|[908_916]
RIMDPEIAL	|Q9H0L4|[180_188]
LSDSQMKSY	|Q12789|[1439_1447]
REMPVKVEA	|O95373|[509_517]
EEEEPVKEA	|P19338|[268_276]
AEHNDLQYA	|P41091|[323_331];|Q2VIR3|[323_331]
YTFPNGAKY	|Q502X0|[30_38]
KEINISFIP	|O00186|[134_142]
VLMTEDIKL	|Q04637|[719_727]
TTEQHGARY	|O15533|[372_380]
REQIDFLAA	|Q8IVT2|[188_196]
RVADYIVKV	|Q96EP9|[260_268]
NSDINSNHY	|Q9UPW5|[737_745]
TADPLDYRL	|P52948|[1516_1524]
NTDSPLRYV	|P08865|[149_157]
EEWHGHVTA	|P61599|[68_76]
AEHSPYYEA	|Q12931|[508_516]
EEKEDVKSC	|O75947|[93_101]
NELQTVYEA	|Q9ULD2|[983_991]
YTDGSQQRL	|Q9ULD2|[275_283]
VRHEGTRTL	|Q9BZJ4|[115_123]
ASDMLQLEY	|Q8WVZ9|[147_155];|Q86V97|[147_155]
RILDESHSI	|Q9HCK8|[728_736]
STDSETLRY	|Q9HCH5|[281_289]
NLMEQPIKV	|P14923|[5_13]
HEIAVNENF	|Q8N4U5|[79_87]
ALWERIEGV	|Q9BWT7|[26_34]
YTDFDGTRV	|Q9P1W9|[194_202];|Q86V86|[201_209];|P11309|[289_297]
KLDQDLNEV	|Q9UQE7|[436_444]
DEVERVITI	|P62269|[62_70]
YSESNKAIY	|Q8NG48|[181_189]
AEHKHIEVI	|Q96KQ7|[793_801]
HLIHEVTKV	|Q14697|[77_85]
HESGELNQY	|Q13347|[165_173]
KTDLHNEGY	|Q14699|[114_122]
KRATLDEED	|P42892|[22_30]
VSDEKRTEL	|Q9H6R0|[139_147]
AERKFKQVA	|O75190|[42_50]
EDGRLVIEF	|Q86XX4|[3530_3538]
LSEDEENRS	|Q12870|[21_29]
EEIYNSVQP	|Q9Y6Y8|[297_305]
EERPQHPVS	|Q9NX74|[188_196]
YSDGYGRVY	|O43251|[349_357]
NEFEATQKL	|Q16649|[343_351]
MVDPLLTKY	|Q9H5Z1|[162_170]
HEVPYTTSF	|Q8TD19|[580_588]
SENEEFVEV	|P10644|[307_315]
ISDLIRDSY	|O95759|[760_768]
SEDEIKKAY	|Q99615|[393_401]
YTDRETGKL	|P35637|[325_333]
RSEKVTISY	|Q6DCA0|[276_284]
ILFGHENRV	|O14775|[362_370]
SEYMNNKEA	|Q13123|[490_498]
ILEKKVEKV	|P07900|[578_586]
MTDIKNDSY	|Q9NXK6|[72_80]
LLHEENFSV	|Q9UGU0|[1919_1927]
AEQRLQHHA	|O75962|[824_832]
HEQQFAHPP	|Q9NQ55|[131_139]
KQDETQTKI	|P35221|[874_882]
LNDPNPMKY	|Q9UPQ0|[480_488]
AEEENFKKP	|Q15014|[16_24]
RMWEDPMGA	|Q9ULX6|[199_207]
YSHHSGLEY	|P51636|[19_27]
SSEHQTQLY	|Q9NPF2|[323_331]
DETELARQM	|P05198|[282_290]
AIDEDVLRY	|Q13356|[265_273]
RTEPINTTY	|Q9NXF7|[191_199]
MSEDSNLHY	|Q96A22|[70_78]
RTNGEIFQM	|Q9UJ72|[119_127]
EEREGITVY	|Q9NRV9|[123_131]
HSDPESDFY	|O94864|[131_139]
VTDSIRDEY	|O00429|[258_266]
LLDPNPHMY	|Q9UGC6|[163_171]
NLPDEIYHV	|Q9BV86|[209_217]
YAAQENLEY	|O94952|[562_570]
NEQHFTEVP	|Q13625|[13_21]
GEQDWVNRP	|Q7Z5L9|[294_302]
KLQEELNKV	|O75330|[671_679]
RRAPHLHTL	|O14976|[477_485]
KMQEHSDQV	|P33993|[236_244]
EEHNFFLAP	|O60934|[258_266]
KLWEAESKL	|Q9NYP9|[218_226]
YSDINQEHV	|Q9H582|[879_887]
DEFHPFIEA	|O00712|[11_19];|P08651|[11_19];|Q12857|[10_18];|Q14938|[10_18]
RLYQGINQL	|P43246|[406_414]
DEHDFLGQF	|Q96FN4|[106_114]
NLDDNAQRY	|Q9NXH8|[140_148]
AEKYEWDVA	|P13639|[636_644]
QEHFTHNTV	|Q08209|[245_253]
YLDKGILKY	|Q9H4L5|[75_83]
YVEINGEKY	|Q9Y5Y6|[401_409]
RSDPYVKSY	|Q8IYJ3|[300_308]
YTDGDLERF	|P27708|[1102_1110]
PEKWESVKL	|O76021|[242_250]
DEHALIQQY	|P46939|[3224_3232]
KEKLDFHEA	|Q14966|[84_92]
RQIDQFLVV	|O94776|[188_196];|Q9BTC8|[191_199]
KLLNTHHRV	|Q9HCN8|[43_51]
EELEQTYHA	|P20700|[262_270]
TLWVDPYEV	|P78543|[101_109];|P62324|[103_111]
KRIDIIHNL	|Q9ULM3|[299_307]
FLWKEPATM	|Q9BQ70|[508_516]
FTAERSSYY	|Q7KZF4|[632_640]
NSELLNDRY	|Q7Z406|[1768_1776]
ATDYHVRVY	|Q53EP0|[348_356]
RLHEKIQEA	|O75683|[120_128]
KLSEENRHL	|Q9P0L0|[188_196]
DLDNDLMKY	|Q96FT9|[134_142]
DELERFTSM	|O60610|[47_55]
DEFEFLEKA	|Q14258|[303_311]
YTDSYTDTY	|P18583|[1132_1140]
AETHYTYFP	|P22415|[112_120]
FVETESVRY	|P48444|[48_56]
YSSPYPQEY	|Q92794|[523_531];|Q8WYB5|[734_742]
SEELRHYEA	|Q13635|[1235_1243]
KVIDEIYRV	|Q9NVF7|[172_180]
GMDNDFHHY	|Q9Y2L1|[757_765]
YSDPYVKTY	|Q14183|[286_294];|Q14184|[301_309]
VSEQELLRY	|Q13608|[962_970]
YLEDTDRNL	|Q9Y4A8|[527_535]
NTDRNIDKY	|Q9UK61|[346_354]
LTEKANHYY	|Q5TA45|[271_279]
QMISRIEYV	|Q8N752|[119_127];|P48729|[119_127]
IRDNFVIVY	|Q9Y6Q5|[103_111]
HSERTSFNY	|P15559|[12_20]
NEVEKTMEY	|Q86UC2|[440_448]
QEKFRHNIA	|Q96AB3|[24_32]
DEFSDFDRL	|Q9Y6I3|[402_410]
RNKEIVHTF	|Q8NI36|[150_158]
ASEYDQIRY	|Q86Z02|[395_403];|Q9H2X6|[404_412]
KLFDRPQEL	|Q5VZ89|[481_489]
YTDNQHLKK	|Q96SN8|[668_676]
QEVDHHWQA	|Q16644|[83_91]
DEKKNDHTY	|P13196|[208_216]
EEERKQMEA	|Q9BT92|[255_263]
MEQQQAYRP	|Q9BUJ2|[131_139]
HEYTTKEVF	|Q969P6|[102_110]
YLYPDITRL	|P31641|[277_285]
EEMRHIDMV	|P52789|[240_248]
QEDDRYYTA	|O75882|[1171_1179]
RLMKELEEI	|P68036|[6_14]
EEMKKIRQV	|Q9UIV1|[22_30]
HSEYHTLLY	|Q9UQL6|[744_752]
LSDLKHMRY	|Q7Z4H7|[348_356]
RLVEIQYEL	|Q14161|[218_226]
FLDDFESKY	|Q8TF74|[392_400]
KEKEEFREA	|Q7KZI7|[680_688]
NMDEKSQRY	|Q14500|[59_67];|B7U540|[59_67]
ETEKMIEKY	|P11277|[299_307];|Q01082|[299_307]
DDWDNRTSY	|Q9UGL1|[1317_1325]
YLEETSIRY	|O75618|[117_125]
TETEMFEKY	|Q9H0I3|[42_50]
YSEEECKQY	|P63096|[61_69]
FDNDYKTLY	|P41252|[144_152]
EERVINEEY	|Q09028|[13_21];|Q16576|[12_20]
DELHYLEVY	|Q96QK1|[72_80]
NEYESRSLW	|Q96SU4|[661_669]
FSEEQLNRY	|Q15544|[113_121]
MEHPYFYTV	|P68400|[319_327];|Q8NEV1|[319_327]
YVDDPYQKY	|Q9NZE8|[172_180]
YSDHHENKY	|Q16659|[427_435]
LEHEYIQNF	|Q15691|[67_75]
REHQNFYEA	|A6NI28|[169_177]
EEQPYFRET	|Q9Y2D9|[76_84]
DEYQFVERL	|Q13405|[43_51]
ITDEQRQYY	|Q96D71|[281_289]
DKETYELRY	|Q6P5R6|[100_108]
DTDHYFLRY	|Q969N2|[165_173]
DEKRDFRTY	|P53350|[554_562]
KEYERFSKY	|Q13838|[131_139];|O00148|[130_138]
REQERQWRA	|Q96H55|[778_786]
YIDEQFERY	|Q15019|[121_129]
ASVAAAAAAA	|Q14839|[224_233];|Q96SC8|[30_39]
AEAAAAVVAA	|O75400|[274_283]
AEQGPAATAA	|Q96A09|[378_387]
AEAARAAEAA	|Q14004|[462_471]
AEGGASRFSA	|P78344|[6_15]
AEAILGQNAA	|P27694|[536_545]
IADTGANVVV	|P50990|[283_292]
TEQDPGSASA	|O94812|[60_69]
TSSGGPARAY	|P61619|[327_336]
AESAAAYTKA	|Q9H6Z4|[370_379]
AEAEALARSA	|Q9BXP2|[828_837]
AEAGGYLHTA	|Q3KQZ1|[87_96]
AEQDSTTVAA	|Q86U44|[180_189]
ASEVGSPPSY	|Q86YD5|[250_259]
QVDGGANFSV	|P36551|[169_178]
AEAESRAEAA	|Q14764|[724_733]
AEGKISETTA	|P17858|[141_150]
ALFSGDTGEI	|Q9Y230|[259_268]
AEDDLNTVAA	|Q5SRD1|[151_160];|O14925|[151_160]
NERSAQGTSA	|O95714|[326_335]
SEHGLVVIAP	|P10768|[72_81]
AEAEPPSEVV	|Q06265|[317_326]
SLDPNAVKAL	|Q29RF7|[493_502]
EERGGQAQSA	|Q13105|[167_176]
AESEASSRVP	|Q9P1Y6|[729_738]
ASETSGHQGY	|Q9UGU0|[70_79]
SADTPTATNY	|Q9H6Z4|[289_298]
AEEMETGNVA	|Q5VY09|[258_267]
SEEDKGGKMA	|Q8IYB3|[465_474]
AEAYLGKTVT	|P11142|[131_140]
AEQDPEARAA	|Q6XQN6|[3_12]
AEQAANDLRA	|Q7Z406|[1554_1563]
MEKEADAKAA	|Q96PK6|[119_128]
IIDDPSGNSF	|O75312|[195_204]
AELEEKGHSA	|Q14185|[575_584]
AEELGNNVKP	|Q9UJ83|[308_317]
YEAPSLATGY	|P28070|[177_186]
LMAEMGVHSV	|Q9NWZ5|[485_494]
FSETGGGEKY	|Q8NCM8|[2824_2833]
SSDSVGGFRY	|Q14677|[163_172]
HESDFSGVTP	|Q99459|[388_397]
AEQMAKKAEA	|O75955|[335_344]
AEQLMTLISA	|O60502|[116_125]
RLADEFGVAV	|Q06609|[254_263]
MEEEASRSAA	|Q9H869|[1_10]
AEHPLSRAEA	|O60287|[2109_2118]
KLLEPVPVSV	|Q86W34|[125_134]
AEEDPPREAA	|P78314|[363_372]
ASDRTGLSDY	|Q8IWK6|[565_574]
FTDGDAALEF	|Q969S3|[334_343]
TEHDLLGTEA	|O43292|[185_194]
SEHINEGETA	|P35613|[229_238]
SEAEPVQRTA	|Q9BW71|[199_208]
EEAGFHTVEA	|Q06609|[42_51]
EEEEAKTVSA	|Q8IVD9|[92_101]
LLYDDKGVGL	|Q8IXT5|[432_441]
PTDGPPNSFY	|Q9UKB1|[196_205]
LADSDARALY	|P04083|[198_207]
TAEDPSKSYV	|O14929|[274_283]
AESDLAYTRA	|P52788|[171_180]
TSDDSAVNMY	|A2VDJ0|[296_305]
ALFPGDVDRL	|P11216|[417_426]
VVDPGDPRSY	|O96013|[311_320]
EEEKVLGETA	|Q02952|[1426_1435]
ATDPDDTHAY	|Q99715|[1347_1356]
AEGQTIVYQP	|P23511|[163_172]
ASEFPGAQHY	|Q9BRR6|[146_155]
SYVSPRILTA	|Q9H992|[314_323]
RLQAPELANV	|Q5VV67|[1216_1225]
EEHPGSRMTA	|Q5T124|[321_330]
HTDCPGHADY	|P49411|[124_133]
KLMNVDPDSV	|O75293|[45_54]
RMISEELVAA	|Q9UFC0|[193_202]
GLDIDGIYRV	|Q8IWW6|[684_693]
NSDSQAEAHY	|Q569K4|[167_176]
ALCEENMRGV	|P13639|[691_700]
AEQQKAQFTA	|Q9Y5J9|[18_27]
SSDKYGDTSY	|Q9Y3S2|[258_267]
TLLEDGTFKV	|Q9HBL8|[23_32]
AEENFRSISA	|Q5SRH9|[524_533]
TTDLFGRDLS	|P52597|[256_265]
STEHSSVSEY	|Q12929|[476_485]
RLIDLPGTEL	|Q14CB8|[67_76]
AEIKDGERLP	|P35606|[333_342]
VILEGELERA	|P67936|[134_143]
EEERLQAIAA	|Q5SXM2|[301_310]
QVDPLSALKY	|Q9UL63|[649_658]
QTALPGNDRY	|Q9UHP3|[71_80]
RLDELGGVYL	|P04844|[190_199]
MEEQVTKAEA	|Q9NUP1|[152_161]
LSDKGRDGKY	|Q53EP0|[320_329]
NTDPSIVMTY	|Q9H1A4|[250_259]
EEQDSLSHKA	|Q01850|[369_378]
EEYGPELHVA	|Q9Y5W7|[224_233]
SEIESKVREA	|Q14677|[22_31]
KTDPKDPANY	|Q93009|[439_448]
NLDQATRVAY	|Q9NTJ3|[720_729]
RERPPEEVAA	|Q16891|[195_204]
AEQQALRLEV	|Q86X55|[51_60]
QTETAADCRY	|O75362|[667_676]
RLYPEGLAQL	|P61421|[246_255]
TVDGPRHDTY	|Q9H0V1|[489_498]
AEAFLRQQQA	|Q14692|[676_685]
TLDENPGVRY	|O00186|[187_196]
LSDPQTRAIY	|Q9NVH1|[69_78]
AVDFAERHGY	|P62917|[31_40]
VIRKGSITEY	|Q12982|[109_118]
ATDMPVKNQY	|Q96CN4|[131_140]
FVDDGTETHF	|Q9NVQ4|[133_142]
RSDPNSESLY	|Q93073|[379_388]
YSELGHPFGY	|Q9UL03|[358_367]
YTDPAGLRNY	|Q12770|[533_542]
SVDKKGHVHY	|Q14839|[631_640]
TMDNPTTTQY	|Q9NP97|[33_42]
LVDSKGFDEY	|Q01469|[13_22]
MEVDPIGHLY	|P43357|[167_176]
TTDPYLTNSY	|Q7LFX5|[209_218]
HSDKSRPGQY	|Q15599|[166_175]
HTDDPSKECF	|O94827|[124_133]
SERKIEFDSA	|P04844|[466_475]
TTEDVKGRIY	|Q15021|[512_521]
FTEDALGLRY	|Q9Y6X4|[206_215]
DTDAQQAFKY	|Q71RC2|[245_254]
ALDGRETDFY	|Q5VT25|[1297_1306]
KTDVHSPLKY	|Q495T6|[737_746]
QETGFNRHEA	|O43164|[329_338]
LTDNGRHITY	|P49815|[146_155]
YTAHVGYSMY	|P28360|[291_300]
VTDPEKLNNY	|Q8TEK3|[119_128]
KEKYEKDIAA	|B2RPK0|[152_161];|P26583|[152_161];|P09429|[152_161]
VTDDSPKYNY	|P49588|[480_489]
YTDSEPRATY	|Q9UM82|[338_347]
TTDLSFLDKY	|A0AVT1|[145_154]
QVDPNYAYAY	|P30260|[595_604]
AEQEMQRIKA	|P35240|[405_414]
KSSESEFTQY	|P28290|[648_657]
AEIEYTFHQA	|Q08174|[313_322]
DSDINNRLVY	|Q8TE02|[73_82]
LTDPMFRGIY	|Q6P1N9|[13_22]
DVDHGNFFTY	|Q96T88|[469_478]
YTEQSQIKGY	|Q9NZ42|[47_56]
HLDQSQKSLY	|Q9Y2L8|[234_243]
LSDPKKRDVY	|Q8WW22|[55_64]
NEDEPIRVSY	|Q96G74|[320_329]
LIDQDARDLY	|P07355|[190_199]
STDKAEYTFY	|Q06330|[332_341]
RVDPNGFFLY	|Q01970|[44_53]
AQYENPPHIY	|O00160|[78_87];|Q12965|[80_89]
AFLNDSYLKY	|Q8WVM7|[325_334];|Q8N3U4|[322_331]
YTDFDGTRVY	|Q9P1W9|[194_203];|Q86V86|[201_210];|P11309|[289_298]
RTELPQFVSY	|Q14166|[394_403]
MIDETRNSLY	|Q16891|[647_656]
EQLEDKKRKA	|O95394|[392_401]
RTDYGQVFTY	|Q9HD67|[35_44]
YSEDLSDMHY	|Q9HBG6|[415_424]
NSEEMKEAYY	|O14730|[378_387]
NLDEEKQLLY	|Q96NE9|[261_270]
EEIRHMFHVA	|Q13085|[1728_1737]
SDHFETIMKY	|P07814|[270_279]
ESDGKSRWFY	|Q9H993|[101_110]
DEARDLIQRY	|Q6P2Q9|[1104_1113]
LLEDKHFQSY	|Q9NNW5|[384_393]
YLDEQRAVKY	|Q14154|[366_375]
YTDTHDNTRY	|Q13635|[630_639]
YSENVERTKY	|Q9HCD6|[188_197]
QSDPWQQELY	|P49748|[622_631]
DEAEREKQQY	|Q9P0W2|[121_130]
YLDPNQRDLY	|Q86YE8|[44_53]
NEIEDTFRQF	|Q16864|[46_55]
RYYSGLIYTY	|Q7Z406|[128_137];|P35579|[104_113];|P35580|[108_117]
TTDDWKDFLY	|P09960|[421_430]
SDKETYELRY	|Q6P5R6|[99_108]
EEIWNDFREA	|P50579|[163_172]
REHQFYETLP	|Q9UHH9|[47_56]
YLDKEDTFFY	|Q9BTC8|[123_132]
AEDPGSAGEAA	|O94966|[1043_1053]
AEASSSQGTAA	|P98175|[512_522]
AEQPPGGGDSA	|Q15742|[9_19]
SRSGDSGGSAY	|Q15036|[10_20]
ATDTASGTGLY	|Q6ZN55|[57_67]
AEAPSESKPAA	|Q92539|[370_380]
AESPASRQAAA	|Q86YP4|[338_348]
KMVGDVTGAQA	|P13164|[67_77];|Q01629|[87_97];|Q01628|[88_98]
AEAPSTTKTTA	|Q96FV0|[306_316]
AEVGSDGERVA	|Q9UK96|[338_348]
AEIPAGPGREP	|Q9UHY1|[367_377]
YTDGPGGSGQY	|Q9BZ72|[48_58];|O00562|[48_58]
KENSSPSVTSA	|O75909|[5_15]
SEKQLSQATAA	|Q15046|[44_54]
TMAKESSIIGV	|Q08257|[259_269]
EEEGTGVVHQA	|P41252|[315_325]
TSDMLAAASKY	|Q7Z2K6|[384_394]
GTDGQGGTFRY	|Q9UDY4|[78_88]
AEAEASREARA	|P27105|[209_219]
QTDIQGALSAY	|Q6PD62|[424_434]
RVLPPSALQSV	|Q96GD4|[333_343]
EEKRASISDAA	|Q96H22|[57_67]
SEQESGNGRDV	|Q9Y4A5|[434_444]
RLIGDAAKNQV	|P0DMV8|[49_59];|P11142|[49_59];|P0DMV9|[49_59];|P34931|[51_61];|P54652|[50_60]
KEENPEIAVSA	|Q9UEW8|[409_419]
KLSEELSGGRL	|P61158|[348_358]
TESGNISRQEA	|Q08J23|[153_163]
LSDIGSGIRYL	|O15111|[125_135]
AEEEPPTVTEP	|Q02952|[943_953]
ETDPDAQAKAY	|Q5XUX1|[23_33]
SEASSTYQRIA	|Q12986|[902_912]
VLGDDPQLMKV	|Q9Y6J9|[168_178]
ETAMVTADSKY	|Q14318|[167_177]
QESDSINNLQA	|Q96SN8|[572_582]
MEQQTISIAKA	|P33992|[462_472];|P33993|[462_472]
LTELHGGSIMY	|Q9HD67|[71_81]
PTESSQNGKQY	|Q9UKK9|[6_16]
NTDFGDSGRLY	|Q96JM2|[833_843]
QMMQNPQILAA	|P55209|[41_51]
SSSTDSETLRY	|Q9HCH5|[279_289]
AHESVVKSEDF	|P13073|[23_33]
AEIMDAFDRSP	|Q9UMX3|[12_22]
FMDPGPEGKLY	|P46020|[618_628]
YSELASHVVSY	|Q9UMD9|[1057_1067]
IMAQLPQEQKA	|P35221|[672_682]
QADPDVLHNSY	|Q8IYS2|[471_481]
AEQDELSQRLA	|Q7LBR1|[183_193]
VEVEGDNRYIA	|P04844|[350_360]
LSEVNRTGTQY	|P50452|[74_84]
LTDKDTGVTRY	|Q8WXG6|[81_91]
LLTSDDMKNAY	|Q9NYY8|[528_538]
REMPLLKSEVA	|Q01780|[577_587]
FLDSTGSRLDY	|Q9Y6E2|[51_61]
REAPHLEKQPA	|Q9NQ31|[54_64]
ISEQTGKELLY	|P53396|[6_16]
ALWHDAENQTV	|Q12769|[408_418]
VTEGGEPYRLY	|Q14697|[270_280]
YTADGKEVLEY	|Q9Y296|[75_85]
DVREEGKENAF	|Q7KZ85|[1382_1392]
YQDPDATSLKY	|Q86WJ1|[709_719]
HLYSSIEHLTT	|Q7Z6Z7|[111_121]
REDDRVAIHEA	|P33992|[451_461]
SSEKVDKAQRY	|Q8NCE2|[229_239]
ILENPPEEMKL	|O43432|[389_399]
REVRPDTQYTG	|O43709|[264_274]
RTDPVVADYKY	|P37231|[85_95]
ATDDLHHSDRY	|Q5VTB9|[291_301]
YTEKMVSISNY	|Q92979|[212_222]
FSENEKNAAYY	|Q5VWQ0|[400_410]
LTDHTVTFLQY	|Q7Z6J9|[145_155]
FTSDLQDKNEY	|Q8NFH4|[107_117]
EEELFPESERP	|Q9UHX1|[421_431]
YIDQGRNPQLY	|Q9BTT4|[70_80]
ASELEYDMKKY	|P42695|[1249_1259]
AEHDRIARQWT	|Q969T4|[192_202]
YTDHGSDHHYR	|Q9Y580|[219_229]
ITDDQFDFHTY	|Q6N069|[518_528];|Q9BXJ9|[518_528]
KIWDLKERTNV	|Q9UMS4|[375_385]
YTDSSYEEKKY	|P09488|[23_33];|Q03013|[23_33];|P28161|[23_33]
FTENDKEYQEY	|Q9BTL3|[19_29]
ETDEKDFYLYY	|Q9GZR7|[571_581]
REGGPGSSLTLP	|Q9ULM0|[302_313]
KTDGGDPSGLLK	|P13196|[157_168]
ASEAGGPARLEY	|P35568|[35_46]
ASEITSKGASLY	|Q96AJ1|[144_155]
GSDHQSPSSSSY	|O43298|[137_148]
STDTSGYGQSSY	|P35637|[44_55]
TSGYGQSSYSSY	|P35637|[47_58]
AEIKEKIGTRSA	|P25054|[1305_1316]
AEQDAKEEANKA	|Q13451|[417_428]
STDVDKTGASYY	|Q9BY44|[240_251]
ITDSSLGRIAQY	|Q8N1E6|[130_141]
ITDPSLSKTDSY	|Q9NR09|[4013_4024]
VSDPSSPQYGKY	|O14773|[68_79]
TSADEQPHIGNY	|Q7KZI7|[42_53]
PSSEVIKDANLY	|Q15717|[98_109]
AETGQVQKIVLY	|Q00610|[493_504]
QLERPGGLDTLY	|Q6ZVD8|[285_296]
HENEYVHGNVTA	|Q8IV63|[298_309]
LTDKAVKDYSAY	|Q5T4S7|[5079_5090]
ASEQQALHTVQY	|Q5SRE5|[1541_1552]
REKEFKAKEAAA	|O75348|[51_62]
YSQYPVPDVSTY	|P98175|[561_572]
TFESMPNPEGRY	|P04626|[278_289]
YSSGVDAVREWY	|P37088|[241_252]
ASNFLEPEFSKY	|Q96PD2|[199_210]
ESENRSYEGTLY	|O95248|[1758_1769]
NSDPNINQFFKY	|P03915|[109_120]
VLDKDDRRLLSY	|P78316|[322_333]
YSSSRYDDYDRY	|O75494|[105_116]
GEGGPGPAA	|Q9UJK0|[47_55]
PVGGSDAAP	|Q8TE04|[187_195]
AEAEAAAGP	|Q13501|[33_41]
AAAPVVPAV	|O95271|[100_108]
AEEAAGASP	|P49006|[15_23]
KEAGAVAAV	|O00408|[153_161]
ISDTGSAGL	|P30101|[39_47]
AEGPGPRAA	|Q9NR83|[25_33]
AEQSSGPGP	|P48634|[189_197]
AEAMGVANA	|Q9Y2K3|[1413_1421]
SAAEPTPAV	|Q9BWE0|[339_347]
MESGASAKA	|P49588|[862_870]
ALAPGVRAV	|Q9Y508|[70_78]
GEARPGPTA	|Q13501|[214_222]
ALAGDQPSV	|P21333|[1740_1748]
LLAPSPGHA	|Q08174|[49_57]
FLAGAVTSV	|A8MPS7|[29_37]
AVGDGPPRV	|Q08345|[595_603]
RLGGIPVGV	|O00763|[2088_2096];|Q13085|[1977_1985]
GLSGIIPTL	|Q86V24|[286_294]
ATLPAVVTV	|Q9UHR5|[276_284]
AGLQDLVSA	|Q9UKA1|[642_650]
AEKAGTFGP	|Q9Y296|[209_217]
KMVGDVTGA	|P13164|[67_75];|Q01629|[87_95];|Q01628|[88_96]
SEEGPAARA	|Q14160|[764_772]
MEGPTPVSA	|P03915|[237_245]
AEGVRVLGP	|Q02127|[195_203]
LLDVPTAAV	|P13284|[16_24]
AEEPASVTP	|Q5JRA6|[1133_1141]
EEARGLGVA	|Q9BQ89|[214_222]
SVAGSVERV	|Q13868|[55_63]
LLPPPPCPA	|Q9BTY2|[20_28];|Q9NYG8|[303_311]
SEVGSVVSF	|Q9H0L4|[37_45]
TEAVPRAPA	|Q9H6H4|[204_212]
SEKGGQPLP	|Q9H3C7|[588_596]
HRAAVGCSL	|Q6P1M3|[1006_1014]
ALGPTSLRV	|P16144|[1538_1546]
AADLPARGF	|Q8TCT7|[78_86]
KENSGAIEA	|Q69YN4|[373_381]
AEATQSSKP	|Q9UGU0|[1224_1232]
AENLKGESA	|Q08379|[397_405]
ALDSTNVEA	|P62491|[155_163]
SGDDGCVRL	|Q96EE3|[296_304]
SNDPVATAF	|Q9NYL9|[239_247]
ASDLPLGLH	|Q9NQW5|[264_272];|Q9NQV7|[264_272]
KIPTPIVGV	|P51003|[641_649]
GTDGVEANY	|O75533|[797_805]
SEKSGFSSP	|Q12857|[326_334]
AEIAHNVSS	|P62910|[97_105]
SEEKPVPAA	|Q9UK76|[119_127]
VLGPDLKSV	|Q04912|[80_88]
ALVQDLAKA	|P14635|[421_429]
VLADALKSI	|P62244|[6_14]
EEHVASTSA	|Q16875|[480_488]
SEVGDTQVV	|P50990|[353_361]
HESGHAIIA	|Q96TA2|[599_607]
AEKMDANSA	|Q9UBD5|[659_667]
AVHETLVAV	|Q9BRY0|[205_213]
AEREGGMSC	|Q96KS0|[144_152]
VLGPTLKNV	|Q6AHZ1|[419_427]
SLIPTSPQV	|Q5PRF9|[238_246]
AQVALVNEV	|Q7Z6Z7|[2148_2156]
AVHDSFVAV	|Q5UIP0|[481_489]
AGLQFPVGR	|P0C0S8|[22_30];|P16104|[22_30];|P0C0S5|[24_32];|Q8IUE6|[22_30];|Q71UI9|[24_32];|Q9BTM1|[22_30];|Q93077|[22_30];|Q7L7L0|[22_30];|P04908|[22_30];|Q96QV6|[22_30];|P20671|[22_30];|Q99878|[22_30];|Q16777|[22_30];|Q96KK5|[22_30];|Q6FI13|[22_30]
TLDAGNIKL	|O75400|[711_719]
FLGPWPAAS	|P30533|[22_30]
SEAEIQAKA	|Q15149|[1566_1574]
ILSGVVTKM	|P62280|[72_80]
TSGYGQSSY	|P35637|[47_55]
SEKSGMLQA	|P12270|[1315_1323]
AEVVNGYEA	|Q8IZ07|[258_266]
VADPPIARL	|Q14697|[120_128]
AEAVLKHIA	|A0AVT1|[119_127]
ALNIATHVL	|Q9UET6|[139_147]
LTDPAIVKV	|Q01780|[356_364]
KINEAIVAV	|Q9Y224|[218_226]
DGNVFTTGF	|Q9ULV4|[229_237]
SEGVRVNVV	|P49848|[264_272]
NSDDQAVVL	|Q6ZS17|[1075_1083]
SADDGIRNL	|Q13425|[491_499]
KLFIGGLNV	|Q13151|[8_16]
NGDTPNLSF	|Q9NZT2|[88_96]
GEKRFADAA	|Q9BW27|[549_557]
AEYNGRLAA	|Q9NQG5|[238_246]
QEAGPHRVA	|P41229|[836_844]
SGDPAEYNL	|P02545|[573_581]
DEIKIGTSC	|Q9UHD1|[149_157]
TEAEDMISA	|Q9UIG0|[833_841]
MENGAVYSP	|Q9NX76|[1_9]
KESDAMFAA	|O14964|[146_154]
QSDPSGAYF	|P25787|[148_156]
AEAEAVREV	|Q9BZJ0|[505_513]
KLIANNTTV	|O96019|[379_387]
REKAEGDVA	|P67936|[42_50]
AESGVERQV	|P28072|[214_222]
AEADKTIKV	|O43660|[480_488]
EEKVLGETA	|Q02952|[1427_1435]
AETARQETA	|O75674|[160_168]
KLDETGNSL	|P11388|[278_286]
SEQSVAISR	|P41134|[36_44]
RVPPPPQSV	|P29353|[469_477]
AEGQRLFSA	|Q969X6|[69_77]
SLLDSCTKL	|P50991|[115_123]
AEHPIVIVC	|Q8IY37|[266_274]
ASDDGYIKI	|Q9GZS3|[208_216]
ARGPIQILN	|P30876|[1063_1071]
KIGDEPPKV	|P58340|[115_123]
QEASENHVA	|Q99575|[789_797]
VAETPDIKL	|P46782|[11_19]
ALVDIVRSL	|Q9Y5Q0|[423_431]
ALLDRIVSV	|Q92621|[1498_1506]
HLGEYQAAV	|P53675|[1233_1241];|Q00610|[1233_1241]
SEAQQRAQA	|P55268|[1485_1493]
AEDLNTRVA	|Q9Y3B3|[179_187]
TETRVNAQA	|Q92905|[103_111]
TIPEAFRGV	|O00299|[198_206]
SEEQSRLAA	|P20226|[226_234];|Q6SJ96|[263_271]
RIADQFLGA	|O60341|[824_832]
GTWNGTTRV	|P12931|[287_295]
AEGIVVFRT	|Q9HD67|[28_36]
AEHHEAVEA	|Q14160|[791_799]
QSDPAPLQH	|P29401|[189_197]
AEKSDFEAV	|Q13118|[34_42]
EEGINIHLA	|Q12996|[194_202]
VLAELPQQV	|Q96FN4|[523_531]
IRAPAVRTL	|Q9Y446|[243_251]
ETDPGMVHL	|Q9NZN8|[368_376]
SEQLHNVTA	|Q96JH7|[1016_1024]
HEAVPLSVF	|Q6ZTW0|[173_181]
YVDDFGVSV	|Q93063|[114_122]
REAEPAKEA	|Q9Y2I1|[11_19]
GVYGDVHRV	|O95758|[380_388]
AENQRITAV	|Q12996|[160_168]
AEDLNRLTA	|Q9Y6X3|[491_499]
QEKALFAVP	|O43809|[180_188]
NMVAKVDEV	|P62906|[143_151]
AEMRNSILA	|O14737|[37_45]
MEQGRVTIA	|P25205|[426_434]
TLADLVHHV	|Q9Y4A5|[378_386]
STDDGVQFH	|Q15029|[483_491]
TEARFPDVA	|Q9NWF9|[291_299]
VEYEVPEAA	|Q9UHX1|[175_183]
AANKTIIYL	|Q9NU22|[2630_2638]
RVAGIHKKV	|P26373|[82_90]
VMHDSSFSV	|Q6IQ32|[968_976]
KEHQVVVVA	|Q14147|[176_184]
DECPVVNAY	|Q9BPX3|[175_183]
QEASEAYLV	|P84243|[94_102];|Q6NXT2|[93_101];|Q71DI3|[94_102]
REDPDSVPP	|Q9BYN0|[70_78]
EEVQSLPLP	|Q9NX24|[144_152]
AEEDPPREA	|P78314|[363_371]
KEIDVISIP	|Q99661|[276_284]
KEQGRLLVA	|P41252|[382_390]
VMAPRTLLL	|P04439|[3_11];|P30443|[3_11];|P13746|[3_11];|P16190|[3_11];|P30455|[3_11];|P16188|[3_11];|P10314|[3_11];|P30512|[3_11];|P16189|[3_11];|P30459|[3_11];|Q07000|[3_11]
KSDPSIVRL	|P37235|[174_182];|P84074|[174_182];|P61601|[174_182]
NLAENISRV	|P11216|[271_279];|P06737|[271_279];|P11217|[271_279]
DEVTIVNIL	|P07355|[52_60]
ALRETVVEV	|P55072|[463_471]
AEELPHIHA	|Q9H3K6|[61_69]
AEEERLKAA	|Q96EA4|[16_24]
HEDPGNVSY	|P62333|[124_132]
SMLPTLREA	|P56589|[71_79]
PTDPKVVVY	|Q9Y4K1|[1215_1223]
AIDDDIIML	|Q93063|[536_544]
YMIAHITGL	|P04818|[235_243]
KEYLVTVVA	|Q14517|[2148_2156]
DSSMSGYLY	|Q6ZV73|[1333_1341]
KIADFGWSV	|O14965|[271_279];|Q9UQB9|[181_189];|Q96GD4|[215_223]
DESVLTNVF	|Q9UNN5|[382_390]
NLDKNTVGY	|Q9NVH1|[261_269]
LSDLGRLSY	|Q92794|[683_691];|Q8WYB5|[894_902]
DEVGSLIEY	|P23229|[863_871]
YTDTGLWGL	|O75439|[357_365]
TSGPTMRYL	|Q92621|[1076_1084]
EEHSFSYGA	|P78332|[69_77]
RLAEPSQLL	|P14923|[115_123]
NEFEGGMML	|Q9UG63|[560_568]
SETDFKVMA	|Q15007|[14_22]
GMYPNLVHV	|Q9H6S0|[978_986]
SVITQVFHV	|Q00341|[74_82]
YSDDIPHAL	|P60228|[62_70]
TLADVLYHV	|Q9UBL3|[606_614]
KTEQESITP	|O60292|[1062_1070]
REAEVTRTA	|P57740|[15_23]
FLLDKKIGV	|P78371|[218_226]
STELNHLGY	|Q8IXI1|[298_306]
AEQINKMEA	|Q9H307|[275_283]
REAQKFALA	|Q53S58|[147_155]
NEKEGFPIT	|Q9NYV4|[762_770];|Q14004|[740_748];|P50750|[54_62]
AEQPWPPLP	|Q9NQ11|[1167_1175]
TVDGVVFHY	|P13611|[146_154]
KLDENSAFL	|Q13813|[1971_1979]
LVIDVIHEV	|Q9HAU8|[116_124]
KLLEPVLLL	|P62249|[50_58]
TEHSSVSEY	|Q12929|[477_485]
ARHSLLQTL	|P46060|[576_584]
SLADFMQEV	|A5YKK6|[254_262]
HEKQDTLVA	|Q96T51|[443_451]
AERYDDMAA	|P31946|[18_26];|P61981|[17_25];|P63104|[16_24]
LTDRGVMSY	|Q14653|[252_260]
NTDKAVECY	|P49792|[75_83]
TEQSWPHSA	|Q8IWU2|[1458_1466]
AAEQELIRL	|Q15149|[1847_1855]
GTDLSIFKY	|Q96JG6|[401_409]
KEIEGIFHA	|P53985|[45_53]
RNGVMPSHF	|P39019|[84_92]
AEAQLWWAA	|P57076|[187_195]
AEEETTNRP	|Q9NYZ1|[18_26];|Q96ET8|[18_26]
HTDVGLLEY	|Q9Y618|[34_42]
MVWEGLNVV	|P15531|[76_84];|P22392|[76_84];|O60361|[61_69]
DETRTIISL	|O00116|[250_258]
KVFGNEIKL	|P19338|[370_378]
KRASVFVKL	|P50502|[153_161];|Q8NFI4|[153_161];|Q8IZP2|[149_157]
VSDHSGFHY	|Q7Z6K3|[231_239]
EEERKGMVA	|P16083|[198_206]
VEHDAFIFA	|Q12769|[293_301]
RMIGQICEV	|P49815|[59_67]
PTEILYLTV	|Q8NCE2|[360_368]
NTDEPPMVF	|P54578|[21_29]
GMPDFLEKL	|Q9NQZ5|[310_318]
AEKRAYLQA	|P49327|[1702_1710]
ISDRLIGIY	|Q9NTJ3|[1258_1266]
AQAEVYKEL	|P49327|[986_994]
KTDGKIVQY	|Q7Z569|[381_389]
RLDDAIHVL	|Q99081|[406_414];|P15884|[392_400]
YQTEIGQTL	|P14324|[231_239]
TEKRDFVSA	|P51798|[283_291]
EEARKLLPP	|Q1KMD3|[627_635]
EEAQHVLEV	|Q9BV36|[13_21]
LLDNTDIHL	|Q86WA8|[722_730]
ILIDPFHKA	|P61313|[133_141]
DEYSDLVTL	|P46940|[1282_1290]
AEEEPNRIP	|Q14676|[1869_1877]
QELPTIRTP	|O94763|[380_388]
QLVDIIEKV	|P61289|[114_122]
FTAKSPLMY	|O43813|[199_207]
MTDPIRILV	|P38919|[233_241]
RMSDDVHSL	|Q96KQ7|[209_217]
MEIERILGV	|Q14204|[905_913]
DEDLVARVF	|Q92729|[1313_1321]
STEQIPILY	|O94808|[215_223]
SLFRVITEV	|Q93063|[468_476]
KRFSGTVRL	|P62906|[47_55]
RVSDINFTL	|Q5H9R7|[582_590]
RIPAYFVTV	|P26640|[730_738]
REKEEFASA	|Q9Y4R8|[49_57]
RLSESQLSF	|Q96PK6|[616_624]
KLDDTYIKA	|Q99615|[322_330]
KTEQGVSRY	|Q92729|[440_448]
TLHEILNEV	|P43304|[663_671]
AQYENPPHI	|O00160|[78_86];|Q12965|[80_88]
DTDDRTEGY	|Q13433|[485_493]
SSDRTITEY	|P11216|[813_821]
ALNDEIRQL	|Q9UQE7|[799_807]
ALQKRLDEV	|Q9P2E9|[879_887]
TEIEHKVAF	|Q8WXH0|[4284_4292]
HLINFSETL	|Q7L576|[604_612]
KLYGKPIRV	|Q15427|[78_86]
HEIGEFPVF	|O96028|[913_921]
HEHGQLHSM	|O75400|[622_630]
EESHNRFSA	|Q8N163|[841_849]
KEKEEFAVP	|Q9UHD9|[41_49];|Q9UMX0|[45_53]
YMSGYHTGY	|Q16637|[268_276]
RLISKFDTV	|P06730|[61_69]
NEQDLGIQY	|P35221|[169_177]
AENDRFEEA	|Q9HBG6|[873_881]
NEHERVVKA	|O60716|[721_729]
RLWGEPVNL	|Q93008|[1672_1680];|O00507|[1674_1682]
YLADIFTKL	|Q49AG3|[476_484]
HLSDMLQQL	|P53350|[373_381]
HLFRDVAEV	|Q9UIF7|[82_90]
LLAEENQRL	|Q15149|[2723_2731]
KIIDIQEKV	|P12270|[1420_1428]
RLTPKLMEV	|O15372|[168_176]
KLRDSLELL	|Q9NY93|[155_163]
SERIFLHDA	|O15417|[1999_2007]
KEKGTWVQL	|P46778|[120_128]
KLLPQLTYL	|P39687|[137_145];|Q92688|[137_145]
DEAMSLWTH	|Q15652|[1781_1789]
KEMEHNTVC	|P18583|[1543_1551]
LLAEKIYKI	|Q92793|[653_661];|Q09472|[632_640]
RVGDHMMFV	|Q504T8|[144_152]
TMVDRIEEV	|P29375|[1153_1161]
YSEGESLFY	|P49754|[339_347]
DEKKFDEAL	|P08237|[363_371]
DTDISLIRY	|Q8IXH7|[524_532]
TTDLELIKY	|Q13257|[56_64]
DESQVVTRY	|O94966|[1197_1205]
AEMAPYMKR	|Q8N201|[2045_2053]
SEEELKKAY	|Q5F1R6|[15_23]
HRHEGVFIC	|P22087|[91_99]
NEVVNVWTH	|Q8TEZ7|[74_82]
KQYGNEVFL	|P50990|[171_179]
ISEFPTLKY	|Q14554|[349_357]
FLLEKGYEV	|O60547|[42_50]
DENFISRAF	|Q9NX07|[15_23]
AEKAEFYQI	|Q8N3P4|[900_908]
RMFDGKFVV	|Q8TAS1|[392_400]
SETEYVIRC	|Q9Y678|[642_650]
AENDFVHRI	|Q9Y3T6|[54_62]
RLAQHITYV	|P33993|[532_540]
HLSIINEYL	|P46940|[1247_1255]
KMTEEQHSL	|Q96LB3|[462_470]
KLNPQQFEV	|P46977|[289_297]
AEHQLRFTC	|Q5TA45|[505_513]
DEFHNPLAY	|Q92620|[334_342]
SQWDSPMRV	|Q7Z7G8|[2961_2969]
YLNVQVKEL	|Q9NTJ3|[834_842]
SSDRHLTQY	|O14646|[1545_1553]
REIESSPQY	|Q8WWM7|[301_309]
NETRSIIEF	|Q96PZ2|[566_574]
NEYTKFIPP	|Q9P0J1|[379_387]
KLHDERVLV	|Q9Y296|[41_49]
DEVDKVNQY	|Q9Y2H2|[656_664]
SEYQWITSP	|Q5JTW2|[318_326]
RLYDGLFKV	|Q16531|[134_142]
ETERIVTTY	|P50570|[455_463]
KLNDLIQRL	|P53621|[1002_1010]
DEEESKLTY	|Q96G28|[42_50]
YIDPIAMEY	|Q9GZY6|[110_118]
HEYPWILSA	|P53621|[103_111]
TVFEHTFHV	|P41250|[587_595]
PEFMLPVHF	|P06737|[195_203]
AYSSYVHQY	|Q92624|[337_345]
HEIGEWEAF	|Q86WH2|[185_193]
AETEYFVRC	|Q9UBF2|[639_647]
IEKEIKDVF	|O95602|[1621_1629]
RETESNWEA	|Q6DT37|[671_679]
GSHSMRYFH	|Q04826|[25_33];|P30483|[25_33];|P30487|[25_33];|Q31612|[25_33];|P30466|[25_33];|P03989|[25_33];|P18463|[25_33];|P30479|[25_33];|P30488|[25_33]
DENEVRTLF	|P31939|[374_382]
YSAAWAEYY	|Q96AE4|[611_619];|Q92945|[674_682]
LTDDDLLRY	|Q04446|[569_577]
IVDDKFFKL	|O00566|[199_207]
RVDEPMTMF	|Q2NKJ3|[1133_1141]
ATERINLFY	|Q9Y2K3|[1721_1729]
IIDHHDNTY	|P21333|[925_933]
SLLDEFYKL	|Q14444|[184_192]
NELNIIHKF	|Q8WWY3|[105_113]
EERPLFPQI	|P10398|[555_563];|P04049|[594_602]
REVEHFLKA	|O15427|[441_449]
KLMQQQQEV	|O15164|[341_349]
TLWDIQKDL	|P07195|[323_331]
LEVIIPERY	|Q9NPD8|[53_61]
KLDPYVQRL	|Q14204|[828_836]
KRVETSEHF	|P42167|[260_268]
SEDLLKEHY	|P15531|[44_52]
QEENFRLEA	|Q9UJC3|[258_266]
VLWDRTFSL	|P42224|[300_308]
FLFQEPRSI	|Q9UK61|[494_502]
NTEKLKLKY	|O00232|[218_226]
KSFEGLFYF	|Q00610|[706_714]
ILMDERTFL	|Q70CQ2|[3220_3228]
SEIELFRVF	|O75643|[1010_1018]
KTIDYIQFL	|Q9UH92|[179_187]
AEEDFYEKL	|P33993|[328_336]
DEKLLYDTF	|Q15427|[112_120]
SRNKDTYFL	|Q8TAT6|[328_336]
HRAQVIYTR	|P62851|[103_111]
RLPEIYIQL	|Q9H223|[337_345]
HEIITLEQY	|Q9NTI5|[896_904]
FDRPQELKL	|Q5VZ89|[483_491]
DEIEMLERL	|O15399|[814_822]
YLNDFTHEI	|Q9H5V7|[211_219]
HLYDYTVKL	|O00291|[234_242]
IRDNFVIIY	|Q9BXS5|[103_111]
TLFDYEVRL	|Q96T88|[57_65]
QERHFLQQA	|P37198|[347_355]
REQLRQEQA	|Q15149|[1382_1390]
TSEDRFIQY	|O60658|[231_239]
FLEPEFSKY	|Q96PD2|[202_210]
TLDRQLNHY	|Q96MF7|[70_78]
DENSLEYKY	|Q8IX01|[621_629]
AEKFWYDMA	|Q9UPN3|[6006_6014]
LLDQRPAWY	|Q86YD5|[263_271]
LTDRELEEY	|P35611|[567_575]
HEYTTKEIF	|P11387|[266_274]
YTIPDEYRI	|P43243|[773_781]
[truncated: 734 more rows]

## Sheet: HCT116 spliced
sequence	annotation
PMGGGGTAA	|Q5DID0|[558_562_577_580]
IPSASEAAA	|Q9NSY1|[333_336_344_348];|Q9NSY1|[333_335_343_348]
EKAAGTTAA	|Q9Y6R0|[273_274_282_288];|O43290|[10_11_13_19]
ESGPGSPPP	|Q9H972|[267_272_247_249];|Q96RK0|[1580_1584_1595_1598];|Q13308|[689_690_692_698]
AEAGQVTGP	|P42226|[155_160_173_175]
MIGVSAEGA	|Q8WWY8|[150_154_140_143]
METAAAVAA	|Q9NVR0|[26_31_6_8];|Q9NVR0|[26_30_5_8];|Q9NVR0|[26_29_4_8];|Q9NVR0|[26_28_3_8]
AESTGTAKA	|Q14764|[726_728_719_724];|Q14764|[699_700_718_724];|Q14764|[724_725_718_724];|Q14764|[726_727_718_724];|Q14764|[730_731_718_724];|Q14764|[699_699_717_724];|Q14764|[702_702_717_724];|Q14764|[711_711_717_724];|Q14764|[715_715_717_724];|Q14764|[722_722_717_724];|Q14764|[724_724_717_724];|Q14764|[726_726_717_724];|Q14764|[730_730_717_724];|Q14764|[732_732_717_724];|Q14764|[733_733_717_724];|Q14764|[…
DGASAGTIF	|Q86UK0|[1408_1408_1396_1403];|Q86UK0|[1412_1412_1396_1403];|Q86UK0|[1427_1427_1396_1403]
SIPGPSVTV	|Q13219|[1286_1288_1262_1267]
ETNAGPTPA	|P46379|[264_267_258_262];|P46379|[264_266_257_262]
ETAPADVGV	|P49821|[209_211_230_235]
EGLGTVLTA	|Q86WI1|[1770_1776_1799_1800]
GVSDEAESA	|O14686|[1063_1069_1089_1090]
LLAEPGLGV	|Q5VW38|[32_39_7_7];|Q5VW38|[32_39_41_41];|Q5VW38|[32_39_50_50];|Q5VW38|[32_39_54_54]
AEDGARPPG	|Q8TER5|[322_323_301_307]
PSSIPGVDV	|Q2LD37|[3859_3861_3876_3881]
PSSLPGVDV	|Q2LD37|[3859_3862_3877_3881]
AESEPGRGA	|Q5T653|[173_173_197_204];|Q5T653|[175_175_197_204];|Q5T653|[176_176_197_204];|Q5T653|[181_181_197_204];|Q5T653|[186_186_197_204];|Q5T653|[204_204_197_204];|Q5T653|[209_209_197_204];|Q5T653|[210_210_197_204];|Q5T653|[224_224_197_204]
EAADSAFVA	|P09871|[226_231_240_242]
MIAPASPTV	|Q9UKU0|[430_431_436_442]
EKSAVSVAV	|Q4KMG0|[133_136_113_117]
GLSLESTLA	|O43847|[837_842_810_812]
NTDGSNTAL	|Q14766|[1683_1687_1709_1712]
ALISPSPIT	|Q9UNG2|[17_21_6_9];|Q9UNG2|[17_20_5_9]
KEGLTTIAA	|O43324|[57_58_43_49]
KFGLGLEAA	|Q9NPF0|[58_59_28_34]
APGALAMEF	|O95259|[603_605_592_597]
AETDTTEAA	|Q08043|[830_836_812_813]
AEIAHNVSA	|P62910|[97_104_97_97];|P62910|[97_104_100_100];|P62910|[97_104_110_110];|P62910|[97_104_115_115];|P62910|[97_104_116_116];|P62910|[97_104_119_119];|P62910|[97_104_127_127]
APSVEVTDP	|Q9UBH6|[36_43_13_13];|Q9UBH6|[36_43_37_37]
DIDADLLAA	|Q8N1G0|[20_23_11_15]
ESGIVKITA	|Q96MH7|[119_126_132_132]
GGNKYPEPG	|Q8WWY7|[80_83_91_95]
GESMSVPIV	|Q14149|[122_127_146_148];|Q14149|[122_126_145_148]
VGGSEEANY	|P48546|[248_253_229_231]
AEALRILAA	|O75147|[184_185_193_199]
VLSCEAVLV	|Q8NDA2|[3059_3063_3049_3052]
GDAFLAQTL	|P53367|[197_200_178_182]
EAKMDANSA	|Q9UBD5|[650_651_661_667]
ALSDGVHKL	|Q9NVQ4|[11_18_4_4];|Q9NVQ4|[11_18_12_12]
VTDAVVAIR	|Q12816|[280_283_292_296]
SEQMASHAS	|P00519|[1047_1053_1023_1024];|P00519|[1047_1053_1051_1052]
MSGRSTLQA	|Q68DK2|[920_920_904_911]
FDTINEAAA	|Q15742|[305_306_321_327]
DTGTAIVLY	|O75096|[1142_1145_1171_1175]
SNGLPTFHS	|P43251|[419_422_392_396]
TTGLEELTP	|Q7Z442|[939_943_964_967]
DVPTEVTTV	|O94885|[852_858_830_831]
AEERAEVSA	|P67936|[143_150_119_119];|P67936|[143_150_122_122];|P67936|[143_150_130_130];|P67936|[143_150_143_143];|P67936|[143_150_147_147];|P67936|[143_150_173_173];|P67936|[143_150_174_174]
AELGTLMRA	|O43175|[336_337_339_345]
GFPPLYLAS	|P30837|[229_232_219_223]
PVTDSTANY	|Q15811|[815_820_798_800]
SVPGDMLSY	|A6NKD2|[154_157_179_183];|P0CW00|[154_157_179_183];|P0CV99|[160_163_185_189];|Q01534|[154_157_179_183];|P0CV98|[154_157_179_183];|P0CW01|[160_163_185_189]
PETTVNLVV	|Q5JR59|[538_543_569_571]
GDTGYKIGY	|P18405|[179_185_182_183];|P18405|[179_185_208_209]
AEQEDRGAV	|Q00341|[1043_1048_1072_1074]
SLDQTGELL	|Q9BV38|[193_197_206_209]
PLSEGLDTF	|P56645|[828_833_845_847];|P56645|[828_832_844_847]
VSDPSSEKM	|O15516|[445_450_471_473]
EEVEGHPVS	|Q8IZH2|[1062_1065_1036_1040]
AEQTPRPSP	|Q7KZ85|[1678_1680_1697_1702]
PEARPTNQA	|P11717|[1616_1622_1648_1649]
GDVEPEPEI	|Q8WUF5|[477_479_461_466]
TDHSDLTEA	|Q70EK8|[280_281_255_261]
MEAQLSSHS	|Q9Y6D9|[452_457_447_449]
NEDGKIVGY	|Q9BSU3|[25_25_48_55]
ISDIKFSVS	|Q6ZMW3|[1085_1091_1076_1077]
DTYSGFVNP	|Q63HQ0|[296_297_277_283]
VYDDFGVSV	|Q93063|[93_94_116_122];|Q93063|[106_107_116_122]
AEEEPVKEA	|P19338|[276_276_269_276];|P19338|[285_285_269_276];|P19338|[289_289_269_276];|P19338|[290_290_269_276];|P19338|[293_293_269_276]
SADDKSRLL	|Q14667|[1119_1121_1130_1135]
AGRELLWPA	|Q6DT37|[1304_1306_1312_1317]
LANENINQV	|Q9BZ23|[489_490_511_517];|Q9BZ23|[534_535_511_517]
EAEAFENHA	|Q96JQ2|[596_597_596_602];|Q96JQ2|[588_588_595_602];|Q96JQ2|[593_593_595_602];|Q96JQ2|[596_596_595_602];|Q96JQ2|[599_599_595_602];|Q96JQ2|[603_603_595_602];|Q96JQ2|[621_621_595_602]
LIEDGTVFK	|P09172|[160_166_147_148]
YRVYVTPAG	|O75325|[474_477_458_462]
AEETMTVTF	|Q8N187|[518_519_511_517]
IYADSIALY	|Q8NEZ3|[995_998_1012_1016]
CDMPPLLQL	|Q8NGG3|[209_215_226_227]
VIDPRCILT	|Q969Z3|[283_285_270_275]
EAYGEIKNI	|Q9Y5S9|[83_84_96_102];|Q9Y5S9|[126_127_96_102]
EEVEVAPEH	|P00326|[25_31_51_52]
TRDPDLQPP	|O15370|[282_282_272_279];|O15370|[292_292_272_279];|O15370|[296_296_272_279]
SEDSYLVMP	|O94822|[934_939_947_949]
DYAREDMAA	|Q9BQE3|[431_432_421_427];|Q71U36|[431_432_421_427];|P68366|[431_432_421_427];|P68363|[431_432_421_427]
EAHKEFLTA	|Q14738|[586_589_593_597]
LLDNTDILH	|Q86WA8|[722_728_730_731]
QEIPTTRIP	|Q8TCG5|[289_292_313_317]
FSETRTGTY	|Q6PEY2|[53_56_79_83];|Q13748|[53_56_79_83];|Q9BQE3|[53_56_79_83];|Q71U36|[53_56_79_83];|P68363|[53_56_79_83]
LRLDVVYNA	|P62241|[58_62_82_85];|P62241|[58_61_81_85];|P62241|[58_60_80_85]
NSDINSNYH	|Q9UPW5|[737_743_745_746]
EPPDRIIEP	|Q8N7U6|[241_246_216_218]
KEHQRILAA	|Q14152|[563_570_540_540];|Q14152|[563_570_553_553];|Q14152|[563_570_556_556];|Q14152|[563_570_570_570]
ISELKPMSY	|Q6ZXV5|[98_98_85_92];|Q6ZXV5|[106_106_85_92]
KTEQGVSYR	|Q92729|[440_446_456_457]
EERNKDNVA	|Q96BZ8|[29_30_12_18]
TREETVFVP	|P53992|[612_614_616_621]
AVIEHLREL	|P48664|[517_522_525_527]
NTEEEKSLM	|Q16706|[991_996_1011_1013]
TIDDESIYK	|Q92547|[305_307_278_283]
ILEKVKEKV	|P11712|[244_250_247_248];|P33261|[244_250_247_248];|Q9Y6V0|[1111_1117_1109_1110];|Q9Y6V0|[1111_1117_1114_1115];|P11712|[244_249_246_248];|P33261|[244_249_246_248];|Q9Y6V0|[1111_1116_1108_1110];|Q9Y6V0|[1111_1116_1113_1115]
EDAMSLWTH	|Q15652|[1793_1794_1783_1789]
AIDEDVYRL	|O43427|[32_32_15_22];|O43427|[34_34_15_22];|O43427|[47_47_15_22]
TEIKIPETY	|P61086|[37_38_60_66];|P61086|[37_37_59_66];|P61086|[49_49_59_66];|P61086|[65_65_59_66];|P61086|[77_77_59_66];|P61086|[88_88_59_66]
REMPQVHTP	|P25205|[691_691_716_723];|P25205|[692_692_716_723];|P25205|[695_695_716_723];|P25205|[743_743_716_723]
SEEEIAKKY	|Q96JM3|[694_700_700_701];|Q96JM3|[694_700_708_709];|Q15121|[116_120_105_108]
EDHALIQQY	|P46939|[3223_3224_3226_3232]
DEFFELRTA	|Q16623|[31_35_8_11];|Q16623|[31_34_7_11]
DELLSEERF	|Q5TH69|[89_90_75_81]
DEMRFVTQL	|Q92833|[603_610_601_601];|Q92833|[603_610_617_617];|Q92833|[603_610_628_628];|Q92833|[603_610_635_635]
ASDPFFHYR	|Q9H9Y4|[210_215_217_219]
REEEKNFKA	|P26373|[158_158_171_178];|P26373|[167_167_171_178];|P26373|[183_183_171_178];|P26373|[186_186_171_178];|P26373|[190_190_171_178];|P26373|[195_195_171_178];|P26373|[198_198_171_178]
ISDLKHMRY	|Q7Z4H7|[358_358_349_356];|Q7Z4H7|[365_365_349_356]
HLYEDLFAR	|Q96HA7|[196_202_204_205];|Q96HA7|[196_202_228_229]
FLSEFEHRV	|Q9UNM6|[96_97_65_71]
LKELEILYY	|Q6ZV73|[936_940_921_924]
FSEEQLNYR	|Q15544|[113_119_124_125]
EDFPEVYFR	|Q17RB8|[310_312_279_284]
DEYEHYRVE	|Q9UNH5|[167_172_174_176]
APPEGAPGP	|A8MVW0|[563_567_569_572]
AIGPPVPGV	|P02462|[771_775_762_765]
PAQAEGATA	|Q9BTL4|[164_170_195_196];|Q09013|[554_555_528_534]
PTSAAAMAV	|Q7LFL8|[132_134_122_127]
LGAAGASLY	|P28360|[257_258_266_272]
SCPDAVVAA	|Q8N4X5|[627_634_631_631];|Q8N4X5|[627_634_634_634];|Q8N4X5|[627_634_639_639];|Q8N4X5|[627_634_652_652]
TGDGAGTLF	|Q9Y6N8|[108_110_97_102];|Q9Y6N8|[108_109_96_102];|Q9Y6N8|[100_100_95_102];|Q9Y6N8|[108_108_95_102];|Q9Y6N8|[114_114_95_102];|Q9Y6N8|[126_126_95_102]
APTPGEAVP	|Q8N568|[737_740_732_736];|Q8N568|[737_739_731_736]
GAQTEAPPA	|Q8TDX9|[2035_2041_2060_2061]
ATGEPTAPV	|Q8NDA2|[4326_4331_4302_4304]
ASKLSAEAA	|Q96RT7|[756_756_765_772];|Q96RT7|[759_759_765_772];|Q96RT7|[769_769_765_772];|Q96RT7|[771_771_765_772];|Q96RT7|[772_772_765_772];|Q96RT7|[778_778_765_772];|Q96RT7|[790_790_765_772]
AEIGSTNSA	|Q75QN2|[286_290_266_269];|Q75QN2|[286_289_265_269];|Q75QN2|[286_288_264_269]
EAKDALSGA	|O75146|[533_534_556_562];|O75146|[567_568_556_562];|O75146|[581_582_556_562]
TEAAVETAA	|Q96DC7|[320_326_322_323];|Q96DC7|[320_326_340_341]
AGLEAVTLV	|Q5VWN6|[2279_2280_2290_2296]
EEDSASVAA	|Q02880|[1468_1474_1493_1494];|Q02880|[1468_1473_1492_1494]
PAESSAPNL	|Q8N271|[716_717_691_697]
DSVAVSVLP	|A8K0R7|[691_695_673_676]
QEVPASGEA	|P47989|[562_565_587_591]
SSPEAAVKV	|Q7L3T8|[214_219_242_244]
DVADKSALA	|Q9H0J4|[1320_1321_1323_1329]
KVSEASVAV	|O15440|[448_449_458_464]
TEGSAEIIA	|O94779|[581_582_558_564]
GSDDSAVLK	|Q5VT97|[409_411_393_398]
QSPSATYAA	|Q9UQB3|[302_305_290_294]
SYGVAVTTV	|Q96CT2|[163_167_148_151]
HSDNSPAGL	|O94875|[153_158_126_128]
PTAILDAVV	|Q15029|[810_812_791_796]
NPMAEALGV	|Q8NF37|[286_287_298_304]
GAQDDATIL	|Q13002|[489_494_472_474]
ETLGINASV	|Q86YF9|[554_560_576_577]
KEAVTTLAA	|P42704|[1121_1127_1105_1106]
SLDGKLLSA	|Q6RI45|[1554_1557_1574_1578]
SEVEGSAAR	|Q96RU2|[76_83_62_62]
SNDGSGLVY	|O95965|[152_153_168_174]
VVPTVLATL	|P12110|[969_975_987_988]
DNGSLVVTI	|Q8N3G9|[57_61_46_49]
AEYLSPTAA	|P49721|[57_59_75_80]
VAEEVSGAY	|O95741|[143_149_160_161]
LSDLIPVPA	|Q7Z7M9|[468_474_483_484]
SPSASEANY	|O75815|[418_421_425_429]
HLSGELATV	|Q9P2J3|[393_395_411_416]
TDEKPVPAA	|Q9UK76|[110_111_121_127]
DLSVQAVVV	|Q12908|[124_127_96_100]
VSVEDTALP	|Q92736|[2111_2116_2101_2103]
KEETNGPSA	|Q9UKL0|[443_450_439_439];|Q9UKL0|[443_450_471_471]
VLSCEVIAV	|P50052|[262_263_289_295];|P50052|[274_275_289_295]
PLPGTDTSF	|Q9Y4A8|[286_289_256_260];|Q9Y4A8|[286_288_255_260]
SVDVTAFVP	|A4UGR9|[288_294_309_310]
PANDAYLTA	|Q6ZR62|[90_94_81_84]
ANLEATMSV	|Q08380|[178_182_194_197]
DDDLSATTV	|Q8TCU4|[3320_3326_3295_3296];|Q8TCU4|[3320_3326_3326_3327];|Q8TCU4|[3320_3325_3294_3296]
LDGDPTSSF	|P22681|[805_810_798_800]
LLDDIGHGV	|Q9NYB9|[156_157_147_153];|Q9NYB9|[130_130_146_153];|Q9NYB9|[146_146_146_153];|Q9NYB9|[156_156_146_153];|Q9NYB9|[157_157_146_153];|Q9NYB9|[171_171_146_153]
GILGDVRVL	|Q2PPJ7|[937_942_934_936]
EAVKATVIL	|B6SEH9|[445_448_464_468]
AEQLTVVSV	|Q5TBA9|[1823_1827_1833_1836];|O94915|[1781_1785_1791_1794]
ETGGEITEL	|Q15361|[232_233_204_210]
GIETSNVMV	|Q27J81|[114_116_134_139]
VSVEIYVAA	|P36956|[710_712_717_722]
EALEPEAQA	|A5PL33|[385_388_372_376]
EDVGAVLRV	|Q9NYQ6|[470_473_477_481]
ESFAEALPP	|P33981|[107_110_96_100]
AERDVSLTA	|P57678|[296_303_270_270];|P57678|[296_303_288_288];|P57678|[296_303_290_290];|P57678|[296_303_296_296];|P57678|[296_303_306_306]
TVVSEISQV	|Q5T160|[76_82_62_63];|Q5T160|[76_82_104_105]
TEGDIMVTV	|Q8NFC6|[2614_2614_2635_2642];|Q8NFC6|[2622_2622_2635_2642];|Q8NFC6|[2628_2628_2635_2642];|Q8NFC6|[2641_2641_2635_2642]
KCSSSELIV	|Q9UJF2|[414_421_410_410];|Q9UJF2|[414_421_444_444]
ASVLVLHQV	|P98160|[2229_2233_2205_2208]
VFSDLGEVC	|P56715|[1309_1312_1299_1303]
AEALYTETA	|Q9H4K1|[112_119_105_105];|Q9H4K1|[112_119_107_107];|Q9H4K1|[112_119_112_112];|Q9H4K1|[112_119_114_114];|Q9H4K1|[112_119_127_127];|Q9H4K1|[112_119_140_140];|Q9H4K1|[112_119_143_143];|Q9H4K1|[112_118_126_127];|Q9H4K1|[112_117_125_127]
QAELVPAQL	|O75691|[681_687_659_660]
EDDATDFSA	|O94988|[916_919_904_908]
PETTVVNIV	|Q9HA47|[124_129_103_105]
ENGLNVQSL	|P53992|[984_988_1002_1005]
EDVPVGVEM	|Q5VZL5|[1448_1449_1452_1458]
PEYGVEAIP	|Q8N108|[216_218_240_245]
PEGYVAEPL	|Q86X53|[75_79_52_55]
TARTHGVSF	|Q5T440|[266_270_252_255]
KLADMKEAA	|P16219|[313_317_343_346]
EQTDSSLVV	|Q9NWK9|[98_99_121_127]
IGQEASHEL	|O15020|[1746_1749_1718_1722]
EQYFGSLAA	|Q9BY32|[161_162_188_194]
GFTESAITY	|Q9Y6F7|[294_296_279_284];|Q9Y6F7|[294_295_278_284]
LSADLNSRL	|Q5VT66|[216_217_222_228]
RTDGSFSGY	|P83731|[23_26_7_11]
AESKNTSRP	|Q69YN4|[1660_1663_1645_1649]
SREQTSKPG	|Q86V48|[467_470_491_495]
ESELQSVQA	|Q9BU64|[12_13_37_43]
LRADQFLGA	|O60341|[819_820_826_832]
EHAHEAAEV	|Q86WN1|[265_268_258_262]
REKGSQPPP	|O43491|[64_66_46_51];|Q04323|[165_167_184_189];|O43491|[64_65_45_51];|O43491|[60_60_44_51];|O43491|[61_61_44_51];|O43491|[64_64_44_51];|O43491|[72_72_44_51];|O43491|[76_76_44_51]
TEETEMVSA	|Q8IZ16|[86_90_115_118];|Q02952|[1016_1018_1000_1005];|Q5VST9|[5532_5534_5544_5549]
NNHLEAEAV	|Q9H9B1|[816_821_820_822];|Q9NVX0|[96_101_100_102];|Q9NVX0|[96_101_125_127]
KSGEAWVQP	|Q16760|[950_951_918_924];|Q86XP1|[957_958_925_931]
EESVETVIP	|Q8NGP4|[263_267_278_281];|Q8NGP3|[263_267_278_281]
SEWDGIVSL	|Q9NRA0|[236_242_234_235]
AGETLQMEQ	|Q02086|[491_494_484_488]
PEGDTYQSL	|Q5HYW2|[263_264_280_286]
ERDDPSVPP	|Q9H2X0|[910_913_887_891]
IVDRPVTIV	|O96000|[34_40_24_25];|O96000|[34_40_34_35]
AELISETEK	|Q8N3K9|[995_997_1013_1018]
KEQSVCKEA	|P51170|[454_455_450_456];|P51170|[460_461_450_456]
LTELIHPAE	|Q8WXI7|[11478_11480_11492_11497]
ENPLDSSVY	|O76038|[101_108_117_117]
GHQFLEADI	|Q12899|[195_199_171_174]
EAKEKVDLV	|P38117|[95_96_114_120];|O75165|[699_699_715_722];|O75165|[710_710_715_722];|O75165|[712_712_715_722];|O75165|[717_717_715_722];|O75165|[736_736_715_722]
EAQLNKMEA	|O75943|[616_620_597_600]
AEEDLAWDS	|Q8N9M1|[247_248_274_280]
QEHPELAVI	|Q6NYC1|[318_325_315_315];|Q6NYC1|[318_325_338_338]
EPTLDDVSY	|P53779|[11_15_29_32]
YSDIVTKTL	|P0DJH9|[15_15_23_30];|P0DJH9|[20_20_23_30]
YSDIVTKTI	|O60216|[344_349_335_337]
VDYGGTNRY	|P32929|[135_136_114_120]
AEEETQRSP	|Q9P2H0|[926_929_908_912]
HLMGADLKY	|Q16539|[107_113_139_140];|Q16539|[107_112_138_140]
DGIHHVLRT	|Q8NAT2|[629_631_648_653]
KEPRQGHEA	|Q9NSI6|[991_993_969_974]
MLRLADVAY	|Q13459|[226_228_218_223]
YTDATNPDR	|O75317|[271_272_292_298]
YQTEIGQTI	|P14324|[231_238_205_205];|P14324|[231_238_223_223];|P14324|[231_238_235_235];|P14324|[231_238_262_262]
ALDTTRHEI	|Q9BT25|[239_246_216_216];|Q9BT25|[239_246_252_252]
EDGVYVNTY	|O95819|[1138_1139_1141_1147];|Q8N4C8|[1231_1232_1234_1240];|Q9UKE5|[1259_1260_1262_1268]
QTELSLQKL	|Q9P1V8|[501_505_482_485]
SGDKINYTY	|O15226|[192_193_195_201]
ILYGEVEKI	|Q9NZL9|[184_191_182_182];|Q9NZL9|[184_191_184_184]
LRELKTYAA	|Q6AZZ1|[294_296_298_303]
ITHEILNEV	|P43304|[643_644_665_671]
MPRLDPPDQ	|Q9NW64|[220_226_195_196]
PTDTNVRYL	|Q8N6N2|[202_207_192_194]
TGDELRLLY	|Q9Y4W2|[103_104_109_115]
ATDINDNRY	|Q12840|[1000_1007_990_990];|Q12840|[1000_1007_1014_1014]
KLWESPNVI	|Q9BW83|[77_84_62_62]
LHDQTTDTY	|Q14674|[834_835_847_853]
STEPNNLRY	|P46779|[26_32_39_40]
GSEELSYFY	|O60522|[985_989_974_977]
QEYPDDART	|Q5VWQ8|[540_545_548_550]
DTDISLYIR	|Q8IXH7|[524_529_515_517]
HADPHNSRY	|O00767|[167_174_151_151]
TDEELKKAY	|Q9H819|[120_121_96_102];|Q9H819|[120_120_95_102]
NTDLQTSRY	|Q9Y5R8|[85_88_65_69]
LEYSDRAML	|Q8WZ42|[20340_20341_20328_20334]
REDPNQFVP	|Q9UEY8|[509_510_487_493];|Q9UEY8|[463_463_486_493];|Q9UEY8|[505_505_486_493];|Q9UEY8|[509_509_486_493];|Q9UEY8|[513_513_486_493]
ITEQRALLY	|O15040|[940_941_952_958];|O15040|[940_940_951_958];|O15040|[976_976_951_958]
LLDDHIHSY	|Q8WXX0|[939_944_920_922];|Q8WXX0|[939_943_919_922]
SAVYEDLRY	|O00762|[51_52_73_79]
YIDPVIDRQ	|Q8IVF4|[3487_3493_3506_3507]
ITDDDLRYL	|Q9NYC9|[4118_4121_4104_4108];|Q96DT5|[4148_4151_4134_4138];|Q9UFH2|[4088_4091_4074_4078];|Q9NYC9|[4118_4120_4103_4108];|Q9UFH2|[4088_4090_4073_4078]
VYPETVYRV	|P49840|[202_203_199_205];|P49840|[223_224_199_205];|P49841|[126_127_136_142];|P49841|[139_140_136_142]
ASDKETYRY	|Q6P5R6|[98_104_75_76];|Q6P5R6|[98_104_107_108]
KGDHYLDKY	|Q70JA7|[267_269_249_254];|Q86X52|[177_179_159_164];|Q70JA7|[267_268_248_254];|Q86X52|[177_178_158_164]
IVDEFTYEK	|O43567|[190_191_160_166]
MMNDKLTEY	|Q2PZI1|[64_64_88_95];|Q2PZI1|[86_86_88_95];|Q2PZI1|[88_88_88_95]
LRYHITDQV	|Q9NY97|[317_318_320_326]
RWEYMPLTA	|P36551|[426_430_422_425]
ISERADWQY	|Q5VST6|[66_66_51_58];|Q5VST6|[79_79_51_58]
LLDERHDNY	|Q8TDY2|[1506_1506_1511_1518];|Q8TDY2|[1508_1508_1511_1518];|Q8TDY2|[1511_1511_1511_1518];|Q8TDY2|[1520_1520_1511_1518];|Q8TDY2|[1527_1527_1511_1518];|Q8TDY2|[1530_1530_1511_1518];|Q8TDY2|[1535_1535_1511_1518];|Q8TDY2|[1538_1538_1511_1518];|Q8TDY2|[1540_1540_1511_1518]
EEIAETLAS	|Q8IWV1|[200_207_179_179];|Q8IWV1|[200_207_184_184];|Q8IWV1|[200_207_186_186];|Q8IWV1|[200_207_187_187];|Q8IWV1|[200_207_190_190];|Q8IWV1|[200_207_208_208];|Q8IWV1|[200_207_211_211];|Q8IWV1|[200_207_213_213];|Q8IWV1|[200_207_221_221];|Q8IWV1|[200_206_178_179];|Q8IWV1|[200_206_183_184];|Q8IWV1|[200_206_207_208];|Q8IWV1|[200_205_206_208];|Q8IWV1|[200_204_205_208];|Q8IWV1|[200_203_204_208];|Q8IWV1|[…
APGPVDEAA	|Q15270|[209_212_204_208]
VPGPACAEP	|Q8N0V1|[125_125_101_108]
EAALGSTEA	|Q96QS1|[177_179_165_170];|P78347|[480_481_481_487];|P78347|[486_487_481_487];|P78347|[496_497_481_487]
LSGSVLSSV	|Q9UKA9|[20_27_5_5];|Q9UKA9|[20_27_8_8];|Q9UKA9|[20_27_10_10];|Q9UKA9|[20_27_12_12];|Q9UKA9|[20_27_24_24];|Q9UKA9|[20_27_36_36];|Q9UKA9|[20_27_37_37];|O75417|[34_40_37_38];|Q4KWH8|[1123_1129_1126_1127];|Q9UKA9|[20_26_23_24]
EAATCAEAP	|Q6ZQN5|[240_244_215_218]
LLPGLAEGV	|Q8WZ42|[14970_14974_14961_14964]
PTVLAVIGV	|Q7RTX1|[138_145_112_112];|Q7RTX1|[138_145_118_118];|Q7RTX1|[138_145_140_140];|Q7RTX1|[138_145_143_143];|Q7RTX1|[138_145_164_164]
PPAMGAELP	|Q8NHW3|[35_36_6_12]
VMIPVPAVG	|Q96EY1|[304_310_322_323]
SNGDVVVVV	|Q9UI10|[328_332_358_361]
EEAAVIAAK	|Q6PF05|[259_262_243_247]
AERPGTNSA	|Q13263|[410_417_397_397];|Q13263|[410_417_402_402];|Q13263|[410_417_404_404];|Q13263|[410_417_410_410];|Q13263|[410_417_421_421];|Q13263|[410_417_424_424];|Q13263|[410_417_428_428];|Q13263|[410_416_401_402]
TLSDVVVGI	|Q96EB1|[319_326_300_300];|Q96EB1|[319_326_301_301];|Q96EB1|[319_326_308_308];|Q96EB1|[319_326_313_313];|Q96EB1|[319_326_314_314];|Q96EB1|[319_326_331_331];|Q96EB1|[319_326_348_348];|Q96EB1|[319_326_350_350]
KDVTAVAEA	|Q96L91|[1055_1056_1060_1066];|Q96L91|[1042_1042_1059_1066];|Q96L91|[1051_1051_1059_1066];|Q96L91|[1055_1055_1059_1066];|Q96L91|[1070_1070_1059_1066];|Q96L91|[1080_1080_1059_1066]
PNYVGADVA	|A6NIE9|[151_154_159_163]
ADADIALLL	|Q86UK5|[391_394_407_411]
LLGEALSLV	|Q8IXI1|[9_13_22_25]
AERGPEEGA	|Q14166|[3_8_23_25];|Q14166|[3_7_22_25];|Q14166|[3_6_21_25];|O60347|[253_255_242_247]
NTGDVAVEL	|Q6ZN28|[775_782_753_753];|Q6ZN28|[775_782_757_757];|Q6ZN28|[775_782_760_760];|Q6ZN28|[775_782_792_792];|Q6ZN28|[775_782_807_807];|Q6ZN28|[775_781_752_753]
PAHPAEEAP	|Q02040|[500_503_517_521]
VPGVSEVSF	|Q9UPR0|[748_752_736_739]
DYSLVPGGI	|O75970|[716_717_732_738]
TGDIGIFVV	|P32926|[106_109_98_102]
ISSEELSSA	|Q96F81|[951_954_954_958];|Q3T8J9|[1336_1337_1362_1368];|Q8N987|[30_30_14_21];|Q8N987|[34_34_14_21]
VAGYTEAVI	|Q6ZWL3|[408_411_417_421]
AEAEALYAS	|Q7RTS7|[327_333_344_345];|Q5I0X7|[25_31_42_43]
KGNNSHVAV	|P01133|[146_151_163_165]
ALASELKPV	|A8MVX0|[28_34_15_16];|Q9Y4F9|[540_541_548_554]
VCEIPIIAA	|Q5VZK9|[234_236_208_213];|Q9NUE0|[155_157_124_129]
ETDTPALSP	|O60447|[97_99_67_72]
KKLEAAEAA	|Q9H169|[96_102_100_101];|Q93045|[86_92_90_91];|P16949|[52_58_56_57];|P15559|[90_95_93_95];|Q14683|[310_315_313_315];|Q9H169|[96_101_99_101];|Q93045|[86_91_89_91];|P16949|[52_57_55_57];|Q92574|[976_979_985_989];|Q92574|[976_978_984_989]
VDTDSATEV	|B1AKI9|[292_296_272_275]
VSDFLSGRG	|Q504T8|[129_136_105_105];|Q504T8|[129_136_135_135];|Q504T8|[129_136_146_146]
STDPPTSSF	|A6NJG6|[59_65_35_36];|A6NJG6|[59_65_84_85]
LLDDGHGVL	|Q7Z5Q1|[300_305_310_312]
PQIGEVAII	|Q9HCG8|[227_231_219_222]
KALADKEPA	|P46013|[2764_2766_2752_2757]
KAIADKAEP	|Q9UFH2|[3084_3088_3114_3117]
ARAPGTRTI	|Q13505|[449_456_440_440];|Q13505|[449_456_443_443]
AEETPPSRG	|Q8WXE0|[953_955_939_944]
MEGPVVGVR	|Q9H8E8|[372_374_396_401];|Q9H8E8|[372_373_395_401];|Q9H8E8|[382_383_395_401]
QAGVDEDVL	|Q9UIW2|[304_307_333_337]
TSLPTVVTK	|O75132|[560_561_541_547]
FGKTDVIAV	|Q8WYK1|[1220_1224_1243_1246]
HSDLAPTLV	|Q9C0A6|[941_946_968_970]
SSEFPSTSI	|Q70CQ2|[3456_3456_3466_3473];|Q70CQ2|[3459_3459_3466_3473];|Q70CQ2|[3466_3466_3466_3473];|Q70CQ2|[3470_3470_3466_3473];|Q70CQ2|[3472_3472_3466_3473];|Q70CQ2|[3474_3474_3466_3473];|Q70CQ2|[3478_3478_3466_3473];|Q70CQ2|[3485_3485_3466_3473];|Q70CQ2|[3493_3493_3466_3473]
EQEAVGQAE	|Q9UPN3|[3604_3607_3630_3634]
EELGELSIA	|Q86WA8|[141_147_121_122]
PVDTTVTEV	|Q7Z5N4|[486_492_502_503]
LSELDPPSL	|F2Z3M2|[75_76_99_105];|F2Z3M2|[107_108_99_105]
VKEGDTVIL	|Q9ULU8|[596_603_570_570];|Q9ULU8|[596_603_572_572];|Q9ULU8|[596_603_586_586];|Q9ULU8|[596_603_614_614];|Q86UW7|[562_569_538_538];|Q86UW7|[562_569_552_552];|Q86UW7|[562_569_580_580];|P19320|[613_620_594_594];|P19320|[613_620_605_605];|P19320|[613_620_635_635];|P19320|[613_620_646_646];|Q9ULU8|[596_602_613_614];|Q86UW7|[562_568_579_580];|P19320|[613_619_634_635]
ETCIVAELP	|Q2M3G4|[374_378_358_361]
NPVAAIYDL	|O00443|[639_641_650_655]
HGTSEFVEA	|Q9NR21|[197_200_202_206];|Q9NR21|[197_199_201_206]
EADRGSWSA	|Q7Z2Z1|[1782_1786_1808_1811]
TEAAQVTEM	|Q86TY3|[360_365_340_342]
AESHQHLSA	|Q12873|[1840_1847_1814_1814];|Q12873|[1840_1847_1823_1823];|Q12873|[1840_1847_1826_1826];|Q12873|[1840_1847_1828_1828];|Q12873|[1840_1847_1831_1831];|Q12873|[1840_1847_1834_1834];|Q12873|[1840_1847_1836_1836];|Q12873|[1840_1847_1840_1840];|Q12873|[1840_1847_1852_1852];|Q12873|[1840_1847_1857_1857];|Q12873|[1840_1847_1859_1859];|Q14839|[1829_1836_1803_1803];|Q14839|[1829_1836_1817_1817];|Q14839|[…
IIDNSPASY	|O15194|[219_220_222_228]
YDSAPVDTI	|P15918|[562_565_552_556]
NLAQSAVMF	|Q6NV74|[915_922_901_901]
IGQEGTHEL	|O76094|[187_189_173_178];|O76094|[187_188_172_178]
AEQDPERAA	|Q6XQN6|[3_8_10_12]
QEGVEVVAR	|Q8NBZ7|[248_253_255_257]
HLVPEVTVP	|O15156|[218_223_225_227]
DSGFLNPEL	|Q7Z6E9|[972_973_947_953]
KQCQPPPPP	|Q5T5B0|[8_14_12_13];|Q5T5B0|[8_14_22_23];|Q5T5B0|[8_14_31_32];|Q5T5B0|[8_13_12_14];|P35568|[1189_1191_1200_1205]
REANFTVSA	|P38919|[298_305_280_280];|P38919|[298_305_300_300];|P38919|[298_305_327_327]
DSHLVTVIL	|A2PYH4|[1025_1027_1006_1011]
AISEKLIRA	|Q6V0L0|[250_255_237_239]
FVDLSGHIN	|Q9H5L6|[814_816_807_812]
PNIEDGLFV	|Q8WXG9|[2563_2565_2591_2596]
SLDDRVLSV	|Q969H6|[23_30_2_2];|Q969H6|[23_30_14_14];|Q969H6|[23_30_28_28];|Q969H6|[23_30_33_33];|Q969H6|[23_30_40_40];|Q969H6|[23_30_55_55]
EDAHLASVY	|P36406|[129_130_132_138]
LIDLLPASY	|Q96HU1|[254_255_230_236]
MEQQSLAKA	|Q9UJA3|[534_538_541_544];|Q9UJA3|[534_537_540_544]
YVDPVITSL	|P08581|[654_661_674_674];|P08581|[654_661_675_675];|P08581|[654_661_677_677];|P08581|[654_661_682_682]
YDLDSAVIL	|Q96PW8|[89_94_72_74]
KTYSKVESA	|Q8TDJ6|[2100_2107_2082_2082];|Q8TDJ6|[2100_2107_2083_2083]
WTLLPLAQA	|Q5JTH9|[623_627_603_606]
KTSRAVHTL	|Q9UPZ6|[1572_1578_1549_1550];|Q9UPZ6|[1572_1578_1554_1555]
GDHVHTVSY	|O14773|[326_327_319_325]
ALKDKLEKA	|Q9Y6D9|[347_351_362_365]
KDDLTVVLN	|Q96JC1|[197_197_223_230];|Q96JC1|[204_204_223_230];|Q96JC1|[217_217_223_230];|Q96JC1|[238_238_223_230]
PVGSFDYAY	|Q9HCP0|[336_339_322_326]
TEQRELATA	|Q13948|[436_441_433_435]
KNNEHGYAS	|Q05195|[52_54_27_32]
TDEGIILVY	|P51153|[91_93_83_88]
MEGAELLQH	|Q5TIA1|[683_686_657_661]
AELRHVMTA	|P62158|[104_111_89_89];|P62158|[104_111_103_103];|P62158|[104_111_104_104];|P62158|[104_111_129_129];|P27482|[104_111_89_89];|P27482|[104_111_103_103];|P27482|[104_111_104_104];|P27482|[104_111_128_128];|P27482|[104_111_129_129]
DHEAVDVLM	|Q6PEV8|[379_382_384_388]
LLDDSPKEI	|Q9NRD0|[139_139_163_170];|Q9NRD0|[144_144_163_170];|Q9NRD0|[163_163_163_170];|Q9NRD0|[180_180_163_170];|Q9NRD0|[185_185_163_170];|Q9NRD0|[189_189_163_170];|Q9NRD0|[196_196_163_170]
KQVNEVSKV	|Q96RW7|[203_208_219_221]
GMRKLTVLL	|Q53S99|[77_83_64_65]
SADAAYYLY	|P52848|[48_51_35_39]
EAHFSLIRA	|P11055|[575_581_573_574]
TIAQRVKEV	|Q9Y679|[395_396_367_373]
LSDLNEKLL	|A1L190|[18_22_26_29]
AEHKEFTAL	|Q5JTH9|[849_854_856_858]
EELARLLMA	|Q8IVM0|[185_187_206_211];|Q8TEX9|[996_997_965_971]
REHHVIVSA	|Q9NWT1|[247_247_258_265]
QEIVSLVYV	|Q13976|[113_116_138_142]
PEELTFADE	|Q9UMY1|[64_70_52_53];|Q9UMY1|[64_70_57_58];|Q9UMY1|[64_70_61_62]
LRMNDMTAV	|Q92598|[168_169_171_177]
TSDSDLVYR	|Q12809|[319_325_327_328]
MRACDSLVY	|O75064|[1173_1173_1161_1168]
FPDAFEYAV	|P14384|[156_162_132_133];|P14384|[156_162_173_174]
REKNMDPVA	|Q13459|[648_653_679_681];|Q13459|[648_652_678_681];|Q13459|[648_651_677_681]
ATDHNLLLY	|Q12788|[310_311_313_319]
RENPDIFAV	|P30825|[142_142_162_169];|P30825|[149_149_162_169]
EAHYLPIFA	|Q6UWE0|[615_616_585_591]
TTEQHGRYA	|O15533|[372_377_379_381]
DISQYIQEA	|Q9NNX1|[119_121_104_109]
GGERPVEHW	|P49796|[327_328_346_352]
KARDVGEFF	|O00458|[431_433_446_451];|O00458|[435_437_446_451]
AEYQAFERA	|Q15020|[311_315_333_336]
NPDETDELY	|Q8N6G6|[591_596_607_609];|Q8N6G6|[591_595_606_609]
LIDESHERV	|O95777|[36_37_39_45]
ERKDDKTLP	|Q8N4P3|[99_101_91_96]
YGVTEDYLR	|P85299|[215_216_193_199];|P85299|[197_197_192_199];|P85299|[211_211_192_199];|P85299|[215_215_192_199]
FLHDNMVEL	|P49916|[616_623_592_592];|P49916|[616_623_605_605];|P49916|[616_623_610_610];|P49916|[616_623_617_617];|P49916|[616_623_640_640];|P49916|[616_623_642_642]
VIDPYLLKY	|Q9Y2R5|[17_18_36_42]
FLFNTENLK	|O95163|[1244_1246_1228_1233]
LTYEHNNEL	|Q9NRG9|[50_51_19_25]
KMADIEYRI	|P40937|[304_311_280_280];|P40937|[304_311_284_284];|P40937|[304_311_299_299];|P40937|[304_311_308_308];|P40937|[304_311_320_320];|P40937|[304_311_326_326];|P40937|[304_311_336_336];|P40937|[304_310_298_299]
DEEKFITLF	|P08758|[190_196_179_180]
DISFYNEVY	|Q6V702|[157_162_142_144]
LKWDPVHRV	|P29144|[125_126_138_144]
FLDNERHLD	|Q16512|[452_458_453_454];|Q16512|[452_458_462_463]
LSDLKHMYR	|Q7Z4H7|[348_354_356_357]
EEKRLWTIP	|Q9H7P9|[397_402_383_385]
EERKQWIEA	|A1A4S6|[358_363_340_342]
SDHHENKYY	|Q16659|[428_435_409_409];|Q16659|[428_435_419_419];|Q16659|[428_435_427_427];|Q16659|[428_435_435_435];|Q16659|[428_435_446_446];|Q16659|[428_435_453_453];|Q8TEL6|[466_473_473_473]
LLDVQPHTV	|Q5T2T1|[463_470_452_452];|Q5T2T1|[463_470_455_455];|Q5T2T1|[463_470_461_461];|Q5T2T1|[463_470_466_466];|Q5T2T1|[463_470_471_471];|Q5T2T1|[463_470_483_483];|Q5T2T1|[463_469_470_471];|Q5T2T1|[463_468_469_471];|Q5T2T1|[463_467_468_471];|Q5T2T1|[463_466_467_471];|Q5T2T1|[463_465_466_471];|Q5T2T1|[463_464_465_471];|Q5T2T1|[456_456_464_471];|Q5T2T1|[463_463_464_471];|Q5T2T1|[464_464_464_471];|Q5T2T1|[…
AEYGEIKNI	|Q9Y5S9|[94_101_74_74];|Q9Y5S9|[94_101_89_89];|Q9Y5S9|[94_101_99_99];|Q9Y5S9|[94_101_102_102];|Q9Y5S9|[94_100_101_102];|Q9Y5S9|[94_99_100_102];|Q9Y5S9|[94_98_99_102];|Q9Y5S9|[94_97_98_102];|Q9Y5S9|[94_96_97_102];|Q9Y5S9|[94_95_96_102];|Q9Y5S9|[84_84_95_102];|Q9Y5S9|[94_94_95_102];|Q9Y5S9|[127_127_95_102]
STDHIPILY	|Q06210|[218_225_226_226];|Q06210|[218_224_225_226];|Q06210|[218_223_224_226];|Q06210|[218_222_223_226];|Q06210|[218_221_222_226];|Q06210|[218_220_221_226];|Q06210|[218_219_220_226];|Q06210|[205_205_219_226];|Q06210|[213_213_219_226];|Q06210|[218_218_219_226];|Q06210|[235_235_219_226];|Q06210|[242_242_219_226]
PEPAAPGAA	|Q8IYF1|[184_190_187_188];|Q8IYF1|[184_190_200_201];|P20749|[42_47_27_29];|P20749|[42_47_49_51];|P20749|[42_46_26_29];|O75808|[71_74_74_78]
EEGGPGPAA	|P34130|[147_152_125_127];|O43147|[739_741_744_749];|Q86SH2|[224_226_196_201];|Q9UJK0|[30_31_49_55];|Q9UJK0|[26_26_48_55];|Q9UJK0|[30_30_48_55];|Q9UJK0|[31_31_48_55];|Q9UJK0|[41_41_48_55];|Q9UJK0|[48_48_48_55];|Q9UJK0|[64_64_48_55]
AGSVSGVGY	|Q9HC21|[21_26_2_4]
AEAGPAPAI	|Q9BXU2|[204_211_228_228];|Q9BXU2|[204_210_227_228]
PAGTFAAPA	|Q9BUA3|[271_273_255_260]
VGCVAEANA	|O76014|[30_32_35_40]
TLCGAVVSV	|O60573|[199_200_167_173]
APCMPALGP	|Q9P2F8|[1270_1275_1278_1280]
GPGTPEDSV	|Q6WN34|[210_214_185_188]
APVATQATT	|Q6ZRI0|[1829_1833_1848_1851]
GTGYLSPGL	|Q96MG8|[90_95_80_82];|Q9NV79|[90_95_80_82]
ALGDQLVSA	|Q8N819|[232_235_249_253]
AEKDPGMGA	|P10809|[542_543_554_560];|P10809|[528_528_553_560];|P10809|[532_532_553_560];|P10809|[533_533_553_560];|P10809|[536_536_553_560];|P10809|[542_542_553_560];|P10809|[560_560_553_560]
PAVLTEGTP	|Q5VW36|[1257_1258_1263_1269]
QLSEAPVAA	|Q9BSI4|[120_126_145_146]
AEIEGLKGA	|P05787|[319_326_293_293];|P05787|[319_326_319_319];|P05787|[319_326_329_329];|P05787|[319_326_333_333];|P05787|[319_326_334_334];|P05787|[319_326_336_336];|P05787|[319_326_338_338];|P05787|[319_326_345_345];|P05787|[319_326_349_349];|P05787|[319_326_351_351]
LIPSSDSGL	|Q9UGM3|[81_84_96_100]
DGNTAIEAV	|Q03001|[2031_2036_2017_2019]
LEGPFGAEA	|A2VEC9|[398_403_388_390]
AQSSSLAEV	|P0CJ78|[914_921_896_896];|P0CJ78|[914_921_897_897];|P0CJ78|[914_921_908_908];|P0CJ78|[914_921_928_928]
PEGLAIPEA	|Q53FA7|[102_105_120_124];|Q53FA7|[110_113_120_124]
ADGLITHTA	|Q96D71|[607_614_582_582];|Q96D71|[607_614_586_586];|Q96D71|[607_614_596_596];|Q96D71|[607_614_600_600];|Q96D71|[607_614_607_607];|Q96D71|[607_614_628_628];|Q96D71|[607_614_637_637];|Q96D71|[607_614_638_638]
DNGLALVVV	|Q6UXC1|[582_584_576_581]
RGDDAEAPA	|Q7RTU0|[121_123_108_113];|Q7RTU0|[121_122_107_113]
AENGPSQKA	|Q9UJM3|[82_89_60_60];|Q9UJM3|[82_89_70_70];|Q9UJM3|[82_89_74_74];|Q9UJM3|[82_89_82_82]
SSPDASLEP	|Q8WXI7|[9458_9460_9479_9484]
VGDPSTTNI	|O15042|[268_275_281_281];|O15042|[268_274_280_281]
MVLAEEAAA	|Q9Y2L5|[499_503_521_524];|Q5KSL6|[710_710_720_727]
KDTGGQPLP	|Q9H3C7|[578_580_591_596]
QAELAQLAA	|Q01658|[133_138_153_155];|Q01658|[133_137_152_155];|Q01658|[133_136_151_155]
AEQATAIKS	|Q8N3A8|[350_353_355_359]
QDICAQGDA	|Q68DK2|[2517_2522_2512_2514]
VGDAEEFSA	|P24522|[19_22_4_8]
PADETSVLV	|O00421|[190_194_207_210]
NNKPSATEA	|Q49AG3|[177_180_192_196]
AEQAASAKR	|Q86TC9|[238_243_233_235]
IHDAIVEAA	|Q9NP58|[705_709_696_699]
AGFTTTDVE	|O95970|[354_358_380_383]
KELAVSKAP	|Q9Y283|[967_969_978_983]
HGGENVALF	|A1L0T0|[53_59_38_39]
VALNALDEV	|Q0VDD8|[2352_2358_2325_2326]
AIAEAIKEV	|A8MYX2|[132_138_116_117];|A8MYX2|[132_138_120_121];|A8MYX2|[132_138_150_151];|B3EWG3|[46_52_30_31];|B3EWG3|[46_52_34_35];|B3EWG6|[46_52_30_31];|B3EWG6|[46_52_34_35];|B3EWG5|[46_52_30_31];|B3EWG5|[46_52_34_35];|B3EWG4|[46_52_30_31];|B3EWG4|[46_52_34_35];|A8MYX2|[132_137_119_121];|A8MYX2|[132_137_149_151];|B3EWG3|[46_51_33_35];|B3EWG6|[46_51_33_35];|B3EWG5|[46_51_33_35];|B3EWG4|[46_51_33_35]
VSVEEVVAL	|A6NCL7|[109_113_137_140]
KGPFVEAEA	|Q09666|[1818_1825_1801_1801];|Q09666|[1818_1825_1824_1824];|Q09666|[1818_1825_1836_1836];|Q09666|[1818_1824_1823_1824]
GAAVIELIY	|P45983|[380_384_354_357]
MSGKESLQA	|O75528|[285_290_265_267]
HLGPESVRG	|Q9H8W2|[112_114_104_109];|Q9H8W2|[112_113_103_109]
TSDPAHVVQ	|Q12772|[962_966_969_972]
DHDSLVVAV	|Q5T2W1|[300_303_287_291];|A8MUH7|[183_186_170_174]
LHESISAEA	|Q3V6T2|[592_596_577_580];|Q3V6T2|[592_595_576_580]
AELEGLLGR	|A6NC98|[1090_1096_1118_1119]
PETTTLALI	|Q9UBR5|[101_106_98_100];|Q9UBR5|[101_106_126_128];|Q9UBR5|[101_105_97_100]
LTDDGNPKC	|Q9UDX4|[245_247_249_254]
IESIKMGGQ	|Q9P2N2|[85_89_93_96]
SEFIPKGGK	|Q58A45|[291_298_265_265];|Q58A45|[291_298_296_296]
SEQIMKTAG	|Q07812|[16_22_35_36]
SILEDPPSL	|Q9NVM9|[394_401_377_377];|Q9NVM9|[394_401_386_386];|Q9NVM9|[394_401_389_389];|Q9NVM9|[394_401_396_396];|Q9NVM9|[394_401_427_427]
KEELEIGGP	|Q9BXJ9|[639_642_634_638]
RENLAAVTV	|Q8TDW4|[57_57_64_71];|Q8TDW4|[61_61_64_71]
REAQSILSA	|Q10567|[235_240_257_259];|P63010|[235_240_257_259]
NPGIAYEIV	|Q9NVG8|[222_227_233_235]
FGHSVETEA	|Q96LD1|[176_182_205_206]
LHPAEMLVA	|Q9Y6S9|[413_415_394_399]
SQPQAEVEP	|Q2TAL8|[459_462_453_457]
NESASALMY	|Q53GT1|[279_281_271_276]
ETPTEVLVV	|P18583|[311_316_306_308]
LPHPLLSLV	|Q14209|[377_382_364_366]
GFSQDSFGF	|Q9Y250|[45_50_44_46];|Q5H9R7|[535_540_562_564]
SQDSPIHDP	|Q674R7|[162_168_158_159]
ADSLSLYNL	|P49754|[766_771_750_752];|Q08AD1|[284_287_286_290];|Q9P1Y5|[264_267_266_270]
SEDAVSLLY	|Q9NVE5|[992_995_981_985]
LHDSSLVLL	|Q9HA82|[238_242_234_237];|Q9HA82|[238_241_233_237]
IHDSSLVLI	|P54296|[1092_1094_1101_1106]
ERKADALEA	|Q9NRL2|[307_308_331_337];|Q9NRL2|[359_360_331_337]
AILDDSLEK	|Q8WXA3|[250_253_277_281];|Q9C0D3|[717_720_720_724]
IRISETTSV	|Q9NVW2|[382_384_395_400]
VSELPSVIY	|Q96QF0|[76_80_54_57];|Q96QF0|[76_79_53_57]
TDISDLHHA	|O95759|[758_763_744_746]
YDDSLAVIL	|Q99965|[323_325_306_311]
DEALTKFSV	|Q8IX18|[173_175_164_169]
AEEFAQFVA	|Q9C0D5|[1355_1359_1385_1388]
SEHELDVAI	|O94964|[311_318_342_342]
CRHSSILTP	|Q8NGF1|[125_125_134_141];|Q8NGF1|[130_130_134_141];|Q8NGF1|[163_163_134_141]
FDSLASEFT	|Q96JI7|[1834_1841_1810_1810];|Q96JI7|[1834_1841_1818_1818];|Q96JI7|[1834_1841_1828_1828];|Q96JI7|[1834_1841_1851_1851];|Q96JI7|[1834_1841_1865_1865]
FSEETPVVI	|O75787|[117_124_94_94];|O75787|[117_124_113_113];|O75787|[117_123_93_94]
QAYLSLINV	|Q9HAD4|[256_258_226_231]
DNFIKIATV	|O96013|[322_327_338_340];|O96013|[322_326_337_340]
VNDLKHLLA	|Q5SXH7|[381_385_377_380]
HEDDATLLI	|O75150|[112_113_87_93]
TFDKVSEMA	|Q9BXJ3|[49_53_44_47]
TGLADYLLY	|Q9BT17|[216_218_237_242]
RIDDVSNDV	|Q86Y56|[743_744_753_759]
TEVDFSLRA	|O75976|[453_460_452_452];|O75976|[453_460_473_473];|O75976|[453_460_477_477];|O75976|[453_460_481_481]
RESGVQHKP	|P61106|[210_211_188_194];|P61106|[201_201_187_194];|P61106|[210_210_187_194]
LSDFEVSEL	|Q9BPX3|[696_699_703_707]
YLDAVTVVY	|Q9NUQ2|[221_224_228_232]
ILDRFLATV	|Q14094|[49_49_73_80];|Q14094|[90_90_73_80];|Q14094|[92_92_73_80]
EDETAYASY	|Q86XS5|[265_268_255_259]
YADPVNHYA	|O95758|[226_231_233_235]
EPTLEDAEF	|Q9H773|[28_33_39_41]
EELPRLLSP	|Q9NPC4|[302_309_280_280];|Q9NPC4|[302_309_281_281];|Q9NPC4|[302_309_286_286];|Q9NPC4|[302_309_288_288];|Q9NPC4|[302_309_301_301];|Q9NPC4|[302_309_305_305];|Q2M3V2|[294_297_287_291];|Q2M3V2|[294_296_286_291]
AIFQRPPLI	|O60832|[162_163_181_187]
SGDDTELRY	|Q13948|[562_563_565_571]
VTADLARFY	|Q96S38|[32_34_10_15];|Q96S38|[17_18_9_15];|Q96S38|[32_33_9_15]
ERDFIHTAA	|Q9NR46|[129_136_119_119];|Q9NR46|[129_136_121_121];|Q9NR46|[129_136_127_127];|Q9NR46|[129_136_128_128];|Q9NR46|[129_136_136_136];|Q9NR46|[129_135_127_128]
AEERETTAR	|Q8NI51|[617_619_638_643]
DTTQLPLLY	|Q09428|[1193_1200_1175_1175];|Q09428|[1193_1200_1180_1180];|Q09428|[1193_1200_1218_1218]
EEAQKIFKA	|O95782|[869_869_888_895];|O95782|[888_888_888_895];|O95782|[902_902_888_895]
LLIDLSYVK	|Q9H1A4|[1676_1681_1698_1700]
HLLSEQLEP	|Q969F9|[520_524_538_541]
VSECLYSMH	|Q9UGC7|[271_274_295_299]
DHLDSWVTV	|Q8NFH5|[169_172_174_178];|Q8NFH5|[169_171_173_178]
PEWVDTVKV	|P39019|[31_38_6_6];|P39019|[31_38_9_9];|P39019|[31_38_15_15];|P39019|[31_38_30_30];|P39019|[31_38_34_34];|P39019|[31_38_37_37];|P39019|[31_37_29_30]
RIADVLWNS	|Q13564|[163_164_140_146]
KITDDQLKI	|Q86UP3|[2097_2098_2092_2098];|Q86UP3|[2085_2085_2091_2098];|Q86UP3|[2097_2097_2091_2098];|Q86UP3|[2120_2120_2091_2098]
SCHLLLTQY	|Q9UBA6|[64_67_38_42]
ARIDFSPYL	|P17676|[52_53_73_79]
KHCLDIFTI	|P27708|[2036_2038_2058_2063]
TTDLELLYK	|Q13257|[56_61_76_78]
FLFEDGTFK	|P63146|[72_73_48_54]
YSDLHNIDQ	|Q7Z3T8|[1263_1265_1239_1244]
FLIRESETI	|P51451|[148_155_142_142];|P51451|[148_155_150_150];|P51451|[148_155_174_174];|P51451|[148_155_179_179];|P09769|[168_175_149_149];|P09769|[168_175_170_170];|P09769|[168_175_184_184];|P09769|[168_175_200_200];|P06241|[173_180_175_175];|P06241|[173_180_189_189];|P06241|[173_180_205_205];|P07948|[153_160_134_134];|P07948|[153_160_155_155];|P07948|[153_160_180_180];|P07948|[153_160_185_185]
LLQEVEHLQ	|O94972|[221_227_222_223];|Q9NRC6|[538_543_521_523]
SEYQWITPS	|Q5JTW2|[318_324_326_327];|Q5JTW2|[318_324_331_332]
EETVFQPVY	|Q9Y4F3|[724_729_697_699]
LTWPEVQKL	|Q6IA86|[542_543_557_563]
AVWALERRL	|Q9BQD7|[36_40_15_18]
SLYDWNVLK	|Q7Z7E8|[282_288_291_292];|Q7Z7E8|[282_288_306_307]
DEFSDLDFR	|Q96HH9|[249_255_235_236]
DEEELNRLH	|Q9ULG1|[146_151_162_164]
FSEEQMKYK	|P13010|[323_324_328_334];|P13010|[340_341_328_334]
AENPFLTHL	|Q05655|[405_412_380_380];|Q05655|[405_412_386_386];|Q05655|[405_412_401_401];|Q05655|[405_412_403_403];|Q05655|[405_412_410_410];|Q05655|[405_412_413_413];|Q05655|[405_412_423_423];|Q05655|[405_412_430_430];|Q05655|[405_412_435_435];|Q05655|[405_411_412_413];|Q05655|[405_411_422_423];|Q05655|[405_410_411_413];|Q05655|[405_409_410_413];|Q05655|[405_408_409_413];|Q05655|[405_407_408_413];|Q05655|[…
GAAGPALLGV	|Q16775|[17_19_26_32]
GSPGADSEAP	|Q68CJ9|[397_402_379_382]
KSPSTDATTA	|Q9NWQ4|[446_449_463_468]
SPDSVPAPIP	|Q8N7U7|[337_339_316_322]
AESPASRAQA	|Q86YP4|[338_344_322_324]
QALIAPGDDP	|Q9Y4G6|[1173_1180_1146_1147]
GPDSLITVTV	|Q9NQS3|[177_182_163_166]
RAADAEAEVA	|P06753|[102_103_80_87];|P06753|[91_91_79_87];|P06753|[92_92_79_87];|P06753|[102_102_79_87];|P06753|[106_106_79_87]
SPVLAADVAY	|Q8N3Y3|[478_483_486_489]
TEEDPGARGP	|Q9NX76|[11_16_18_21]
SHADDVHALA	|Q9NWB1|[370_375_344_347]
TSPSSLYLVA	|Q5VZ46|[1100_1102_1080_1086]
CPANVSLARL	|Q7Z6I6|[449_451_437_443]
TEKSVKGSNP	|C9JDV5|[109_117_84_84];|C9JDV5|[109_117_86_86];|C9JDV5|[109_117_101_101];|C9JDV5|[109_117_125_125];|C9JDV5|[109_116_124_125]
ISDPSGPKSY	|Q96S38|[749_749_753_761];|Q96S38|[763_763_753_761]
DSSPASQLSY	|Q08050|[580_582_584_590]
AVIDVGINVR	|P13995|[270_277_298_299]
KEGGDRIILG	|Q9NTG1|[396_397_387_394]
NPALEFEAVA	|Q9Y5G0|[112_113_103_110];|Q9UN71|[112_113_103_110]
EAQSPVARPL	|Q8WUF5|[500_503_483_488]
KLNGGERLVS	|Q8IUX7|[753_753_762_770]
FDLRDVPGAV	|Q9Y2I1|[587_587_556_564];|Q9Y2I1|[590_590_556_564]
SMDAHCATVR	|Q9H9G7|[618_622_627_631];|Q9UL18|[615_619_624_628];|Q9UKV8|[617_621_626_630]
AEEKDMAKAT	|Q9Y6M9|[67_69_55_61];|Q9Y6M9|[67_68_54_61]
GEDAREHVLA	|Q9Y337|[55_59_25_29]
ATDINDNHPT	|Q9H251|[762_763_770_777]
QEISSNDHAT	|Q92889|[777_783_807_809]
LVGDKSLIVY	|Q04446|[484_490_460_462]
AEAEASCRER	|Q76N32|[8_13_26_29];|Q76N32|[8_12_25_29]
QCPSINELQV	|Q7Z2Z1|[732_738_721_723]
DKCEKLINGN	|Q8WZ42|[29031_29034_29042_29047]
GRDLTPDHIL	|Q9Y2E4|[954_957_983_988]
LIDENGVHEL	|Q16222|[486_487_510_517];|Q16222|[507_508_510_517];|Q16222|[486_486_509_517];|Q16222|[494_494_509_517];|Q16222|[507_507_509_517];|Q16222|[517_517_509_517]
ISDKGRDGKY	|Q53EP0|[331_331_321_329];|Q53EP0|[332_332_321_329]
LGAIDKVWQL	|Q92503|[579_581_595_601]
GPGPNSWIYY	|Q9BQS7|[869_873_879_883]
FSEPHACLIH	|P22612|[139_145_163_165]
EKSDEGDVNY	|Q5T2S8|[300_302_278_284]
HSDLLGTLHY	|Q69YN4|[789_797_800_800]
NNFTKAEYTA	|Q9H251|[2877_2878_2846_2853]
NSDFESGLKY	|O75691|[1403_1403_1418_1426];|O75691|[1434_1434_1418_1426];|O75691|[1445_1445_1418_1426]
FLSEPNVKET	|Q71F23|[357_359_375_381]
DQHDYAKAAF	|Q15006|[154_155_169_176]
SLDHLGVVYY	|Q9NXW2|[273_274_289_296];|Q9NXW2|[309_310_289_296]
AEREYTGALR	|Q86X02|[216_221_200_203]
VIHTYNMAMS	|P20929|[1896_1902_1906_1908]
FLDHDVDPLT	|Q587J7|[25_31_54_56]
TNDHLTTVLY	|Q96K31|[124_125_127_134];|Q96EF9|[92_93_95_102]
PMYLYYGLSA	|Q9BW60|[160_160_178_186];|Q9BW60|[189_189_178_186];|Q9BW60|[193_193_178_186]
IETYDVEVVD	|Q9Y5F3|[312_316_335_339]
QDLEIPRPSM	|Q9Y4B6|[424_425_401_408]
GGTERTVWQY	|Q06124|[437_438_415_422]
AEQEMQRAKL	|P35240|[405_411_395_397]
IYDPAQQNLY	|B4DXR9|[54_55_22_29]
QLRLRGLQVY	|Q9BZZ5|[390_393_382_387]
GPGGGPLGEA	|Q8N8E2|[137_143_109_111]
EAVAGPGAAA	|Q68DC2|[44_45_54_61];|Q68DC2|[76_77_54_61];|Q9UBP8|[52_53_28_35]
GPGAAEEAAV	|Q6ZT12|[82_88_109_111]
EPTPAAEDAA	|P17677|[164_165_181_188]
ANNPPTPLAS	|Q15637|[350_354_338_342]
LSMDPPGTAL	|O75448|[818_819_802_809]
ITQVAFAEAA	|Q6ZW61|[457_460_444_449]
SDPLLVGGTY	|P43626|[213_218_193_196];|Q8N109|[208_213_188_191];|P43631|[213_218_193_196];|P43629|[308_313_288_291];|Q14952|[213_218_193_196];|P43630|[308_313_288_291];|P43627|[213_218_193_196];|Q14954|[213_218_193_196];|P43632|[213_218_193_196];|A8MWS1|[308_313_288_291];|P43628|[213_218_193_196];|Q8NHK3|[208_213_188_191];|Q14943|[308_313_288_291]
AELDSLGHLA	|Q8WWL2|[232_239_207_208]
ALADIAQSQI	|Q13503|[121_129_118_118];|Q13503|[121_129_125_125]
EEIAEALGAK	|O15069|[1039_1045_1063_1065]
EAIEELTASA	|Q9Y3B1|[158_159_171_178]
HTVDVTFGAV	|Q7Z7M0|[2522_2524_2494_2500]
HSEAGVQQPP	|P08195|[23_29_4_6]
AEEKPPSGTH	|Q9UM63|[143_151_138_138];|Q9UM63|[143_151_142_142];|Q9UM63|[143_151_156_156];|Q9UM63|[143_151_160_160];|Q9UM63|[143_151_174_174]
HKEKGSVAEA	|O15294|[291_291_304_312];|O15294|[326_326_304_312]
GLLDVGNVIR	|Q7Z2R9|[31_37_52_54]
NTEHGGSQAY	|Q15437|[709_717_707_707];|Q15437|[709_717_734_734]
VIDETTPGVH	|Q9BTE3|[457_461_470_474]
EALEILQNAA	|O60287|[1825_1826_1832_1839]
EEQKDGRAAA	|O75528|[207_212_214_217]
KGNGKEEFVA	|Q9P2S2|[293_295_284_290]
NADDSSKLET	|Q9H7D0|[743_749_716_718]
KSEDPVHLVG	|Q9UKL3|[1198_1204_1208_1210]
LREQDPAPGV	|Q6QHK4|[30_33_2_7]
HVDSGKSTYK	|P68104|[15_22_29_30];|Q05639|[15_22_29_30];|Q5VTE0|[15_22_29_30]
NEDPKDRPGT	|Q96KB5|[302_309_276_277]
EKIDAYIVQA	|Q9H6H4|[100_101_103_110]
VTDQLLIYKG	|Q13371|[251_255_237_241];|Q13371|[251_254_236_241]
FVDTDADTLR	|Q9BZX2|[154_161_168_169]
ANEGKTFLLY	|Q9NPH5|[10_13_32_37]
LNDNPDLAKY	|A2RUC4|[198_199_201_208]
ISDTNNNSHY	|Q5U623|[259_260_274_281]
AELEVAKHFK	|P18848|[27_28_38_45]
AETESHIYAR	|O14569|[5_12_38_39]
ILDTPVKTQY	|Q6N021|[1105_1105_1120_1128];|Q6N021|[1116_1116_1120_1128];|Q6N021|[1139_1139_1120_1128];|Q6N021|[1140_1140_1120_1128]
ASDPYQVHVY	|P30876|[1110_1118_1114_1114];|P30876|[1110_1118_1135_1135]
TEQIYNEGAY	|Q9P2E2|[64_70_56_58]
ILDPAQRTLY	|P17032|[57_58_26_33];|Q3MIS6|[15_15_25_33];|Q3MIS6|[49_49_25_33];|A2RRD8|[15_15_25_33];|A2RRD8|[49_49_25_33];|Q7L2R6|[15_15_25_33];|Q7L2R6|[49_49_25_33];|Q6ZN06|[15_15_25_33];|Q6ZN06|[49_49_25_33];|Q96IR2|[15_15_25_33];|Q96IR2|[49_49_25_33];|Q6PDB4|[14_14_24_32];|Q6PDB4|[48_48_24_32];|Q6PDB4|[56_56_24_32];|P0CJ79|[15_15_25_33];|P0CJ79|[49_49_25_33];|Q9NV72|[81_81_91_99];|Q5VIY5|[15_15_25_33];|Q5…
ERIDDYIVQA	|Q6NUK4|[100_101_103_110];|Q6NUK4|[112_113_103_110]
LSEINKPFYN	|Q5QJE6|[252_258_260_262]
IEYPNLQNLE	|Q9H4P4|[194_196_185_191]
EAEEFFYEKA	|Q9P287|[228_229_253_260]
AEEPLGQLTA	|O15360|[646_654_624_624];|O15360|[646_654_627_627];|O15360|[646_654_628_628];|O15360|[646_654_635_635];|O15360|[646_654_636_636];|O15360|[646_654_641_641];|O15360|[646_654_646_646];|O15360|[646_654_655_655];|O15360|[646_654_656_656];|O15360|[646_654_662_662];|O15360|[646_654_675_675];|O15360|[646_654_678_678];|O15360|[646_653_654_655];|O15360|[646_652_653_655];|O15360|[646_651_652_655];|O15360|[…
ESGGSSFVTA	|Q7Z3T8|[709_710_714_721]
DVSDLSQGVA	|Q9BSJ8|[1056_1058_1084_1090]
VLLDLIGPPG	|Q16769|[245_251_229_231]
GLAPMALVQL	|Q8N6T7|[77_80_96_101]
QPAAADLAFL	|Q5SVQ8|[865_867_851_857]
PGGFAIQFSV	|Q7Z408|[1388_1389_1372_1379]
PTGPDPPQGY	|O43759|[202_207_225_228]
SILDSACSLK	|Q8NF91|[8098_8100_8073_8079]
QIDSSSTPAH	|Q8TEV9|[580_584_599_603]
QELQAVAAGR	|Q9UPP2|[244_247_228_233]
SDLKLQAASL	|Q9HB40|[96_99_106_111]
AAENEGSIFI	|Q8N8V2|[584_588_601_605]
QRPDSGISSI	|P04843|[267_268_270_277]
FQQSVAPAGY	|Q96T58|[2847_2851_2873_2877]
GGVDPVQHTY	|O00468|[88_89_57_64]
IMAEMGVHSV	|Q9NWZ5|[479_479_486_494];|Q9NWZ5|[503_503_486_494];|Q9NWZ5|[504_504_486_494];|Q9NWZ5|[518_518_486_494];|Q9NWZ5|[519_519_486_494]
DFDDAALVTL	|Q5TC63|[22_27_36_39]
TLTEEGVIVK	|Q9BZE4|[322_329_331_332]
GKLCEGFNEV	|Q9Y6H1|[129_129_132_140];|Q9Y6H1|[136_136_132_140];|Q9Y6H1|[149_149_132_140]
TTDTGFHGTY	|Q13868|[34_39_43_46]
KQNSADKLTP	|Q68DN1|[1393_1395_1411_1417]
YLLEGEPGKV	|Q9UHB9|[378_379_366_373];|Q9UHB9|[382_383_366_373]
KIIEDLANTV	|P05783|[131_136_142_145]
VTLGIWQTVT	|Q9P2C4|[429_437_412_412];|Q9P2C4|[429_437_430_430];|Q9P2C4|[429_437_436_436];|Q9P2C4|[429_437_451_451];|Q9P2C4|[429_436_429_430]
GVQDKLMLTL	|O95747|[250_254_236_240]
GGEKAWFQTP	|Q9Y232|[495_496_467_474]
SENATLTLIY	|P19320|[559_567_577_577]
VSDPLSDLKY	|Q13362|[56_64_79_79];|Q14738|[132_140_155_155]
GDCFKTIISY	|Q15019|[106_107_114_121];|Q15019|[92_92_113_121];|Q15019|[104_104_113_121];|Q15019|[106_106_113_121];|Q15019|[135_135_113_121]
SIDNGELRYS	|Q9Y5I4|[309_311_289_295]
AENPFLTHLL	|Q05655|[405_413_380_380];|Q05655|[405_413_386_386];|Q05655|[405_413_401_401];|Q05655|[405_413_403_403];|Q05655|[405_413_410_410];|Q05655|[405_413_413_413];|Q05655|[405_413_423_423];|Q05655|[405_413_430_430];|Q05655|[405_413_435_435]
LTMPETCRYG	|Q99460|[892_900_909_909];|Q99460|[892_900_910_910]
LLDDMNHCYG	|Q02535|[40_48_27_27];|Q02535|[40_48_29_29];|Q02535|[40_48_31_31];|Q02535|[40_48_57_57];|Q02535|[40_48_61_61]
FSEEQLQAHP	|Q5THJ4|[799_807_775_775];|Q5THJ4|[799_807_776_776];|Q5THJ4|[799_807_779_779];|Q5THJ4|[799_807_780_780];|Q5THJ4|[799_807_781_781];|Q5THJ4|[799_807_792_792];|Q5THJ4|[799_807_793_793]
VRVELSNGEW	|P84103|[76_84_96_96]
AEYENLTNLK	|Q8N4C6|[495_502_477_478]
SERPKESMYI	|Q13118|[20_28_19_19]
LHDPNVDYQF	|Q8IUI8|[237_238_240_247]
VTDNKMFIYQ	|Q13535|[2053_2058_2082_2085]
IADHNQMFQY	|Q96RQ1|[239_240_242_249]
YLDEDTIYHI	|P31153|[235_243_227_227];|P31153|[235_243_241_241];|P31153|[235_243_252_252];|P31153|[235_243_266_266];|P31153|[235_243_267_267]
ENMHSLLERY	|Q8NHV4|[652_653_629_636]
AEQAGCMVSA	|Q2T9J0|[12_20_8_8];|Q2T9J0|[12_20_11_11];|Q2T9J0|[12_20_12_12];|Q2T9J0|[12_20_15_15];|Q2T9J0|[12_20_21_21];|Q2T9J0|[12_20_24_24];|Q2T9J0|[12_20_29_29];|Q2T9J0|[12_19_7_8];|Q2T9J0|[12_19_20_21];|Q2T9J0|[12_18_19_21];|Q2T9J0|[12_17_18_21];|Q2T9J0|[12_16_17_21];|Q2T9J0|[12_15_16_21];|Q2T9J0|[12_14_15_21];|Q2T9J0|[12_13_14_21];|Q2T9J0|[8_8_13_21];|Q2T9J0|[11_11_13_21];|Q2T9J0|[12_12_13_21];|Q2T9J0|[…
VSSVPVFGGV	|Q9NVC3|[259_265_277_279]
AEAEEAVAVA	|P31391|[30_37_36_37];|P31391|[30_37_48_49];|P31391|[30_36_35_37];|P04920|[199_202_202_207];|Q92619|[863_866_881_886]
VDPGALFAVP	|A6NMB9|[370_375_359_362]
SEEALSNAVA	|Q8WVM7|[404_410_428_430]
PETAVAELTA	|Q8NBR6|[112_117_142_145];|Q8NBR6|[112_116_141_145]
PSAEVTQLSA	|Q7Z5P9|[4236_4241_4265_4268];|Q7Z5P9|[4236_4240_4264_4268]
VGGNKLQSTV	|Q96KR1|[505_513_485_485];|Q96KR1|[505_513_488_488];|Q96KR1|[505_513_505_505];|Q96KR1|[505_513_526_526];|Q96KR1|[505_513_531_531];|Q96KR1|[505_513_535_535]
QGPHQVPSPG	|Q16559|[80_83_97_102]
HAGNSEIVSP	|Q63HK5|[551_552_578_585];|Q63HK5|[608_609_578_585]
EGESPSLSLL	|Q6V1P9|[2893_2895_2874_2880]
NTAGGFQQLL	|O75469|[289_290_312_319];|O75469|[289_289_311_319];|O75469|[293_293_311_319]
LSDPSGPKYS	|Q96S38|[752_759_761_762]
SIEASGFTEI	|P50851|[1399_1403_1424_1428]
INATNVTKEA	|Q9UKY0|[109_112_98_103]
TEEATEMVSA	|Q02952|[1016_1020_1001_1005];|Q02952|[1016_1019_1000_1005]
EDAGGRFVAF	|Q92890|[283_284_286_293]
VQNTTNASHV	|Q3LXA3|[256_257_247_254]
VMVDGKPVNI	|P63000|[44_52_21_21];|P63000|[44_52_33_33];|P60763|[44_52_21_21];|P60763|[44_52_33_33]
NTDDTIGDKL	|Q9BZL1|[19_26_29_30]
NTDDTIGDKI	|Q9BZL1|[19_26_41_42]
KTDSSPNQAY	|P26599|[137_145_113_113];|P26599|[137_145_114_114];|P26599|[137_145_127_127]
KKILVEGAVY	|P30520|[247_254_235_236];|Q8N142|[248_255_236_237]
RLIEVNGVDI	|Q8TEW0|[510_518_488_488];|Q8TEW0|[510_518_493_493];|Q8TEW0|[510_518_500_500];|Q8TEW0|[510_518_512_512]
NKGLDVELEI	|Q96PY5|[130_135_109_112];|Q8IVF7|[133_138_112_115]
FDSKVTEISL	|Q9H8V3|[22_30_7_7];|Q9H8V3|[22_30_16_16];|Q9H8V3|[22_30_34_34];|Q9H8V3|[22_30_35_35];|Q9H8V3|[22_30_55_55];|Q9H8V3|[22_29_15_16]
FDSKVTEISI	|Q9H8V3|[22_30_21_21];|Q9H8V3|[22_30_29_29];|Q9H8V3|[22_30_36_36];|Q9H8V3|[22_30_49_49];|Q9H8V3|[22_30_54_54];|Q9H8V3|[22_29_20_21]
YVDEEGNLKV	|Q3KQV9|[363_370_360_361]
SIYNGDMEKL	|Q12983|[37_45_14_14];|Q12983|[37_45_21_21];|Q12983|[37_45_47_47];|Q12983|[37_45_48_48]
REDPKDRPSA	|Q96KB5|[278_278_303_311];|Q96KB5|[308_308_303_311]
VIDDSNEHML	|Q9HC35|[366_366_383_391];|Q9HC35|[378_378_383_391];|Q9HC35|[393_393_383_391];|Q9HC35|[411_411_383_391];|Q9HC35|[412_412_383_391];|Q9HC35|[415_415_383_391]
SEDAQQAFKY	|Q71RC2|[221_222_247_254]
TEHDPFKRTG	|Q96C34|[525_532_505_506]
DFHELQDILA	|Q99435|[233_235_243_249]
TQYPFDFGAR	|Q9Y5L3|[148_154_156_158]
LKYTGLEYDL	|Q14997|[831_832_852_859]
REAEHYKIPP	|O75528|[171_171_183_191];|O75528|[199_199_183_191];|O75528|[214_214_183_191]
LVDDFFIGRY	|A2RU14|[97_98_74_81];|A2RU14|[54_54_73_81];|A2RU14|[55_55_73_81];|A2RU14|[56_56_73_81];|A2RU14|[83_83_73_81];|A2RU14|[84_84_73_81];|A2RU14|[87_87_73_81];|A2RU14|[92_92_73_81];|A2RU14|[95_95_73_81];|A2RU14|[97_97_73_81];|A2RU14|[99_99_73_81];|A2RU14|[104_104_73_81]
AGGSGSSKRLA	|Q9BST9|[236_242_211_214]
LCVSPSGVAEV	|Q86TI0|[66_72_44_47]
GGPADMPFLEA	|Q9Y4C5|[384_388_366_371]
TPPVETNGSEP	|O95197|[687_691_717_722];|O95197|[687_690_716_722]
TSDNGKDGLYS	|Q9UM11|[81_89_91_92]
TQDDPDVGLAY	|P39060|[472_473_475_483]
ATEKEASANLY	|Q07820|[37_44_13_15]
PISPTENNTEP	|Q13153|[221_229_207_208]
TSDKDGNHTFS	|Q8N6M6|[109_116_89_91]
SEASSTYQRAI	|Q12986|[902_910_913_914]
TLIDRSGTKII	|Q9H4H8|[246_249_232_238]
QADPQKANNSW	|Q92542|[512_516_528_533]
ISEVNRTGTQY	|P50452|[66_66_75_84]
RLFDEPQLASI	|Q9H0C5|[188_197_203_203];|Q9H0C5|[188_197_211_211];|Q9H0C5|[188_197_219_219];|Q9H0C5|[188_197_221_221];|Q9BX70|[230_239_245_245];|Q9BX70|[230_239_253_253];|Q9BX70|[230_239_261_261]
HPAEMPQNYRP	|Q14258|[491_492_482_490]
EVSWLREGTTY	|P04220|[83_90_112_114]
DSDPASAGIGY	|Q9NRY4|[760_761_734_742]
TTEVHSSSASV	|Q8WXI7|[7433_7436_7416_7422]
GGNPAQLMKEA	|Q9Y4G6|[1785_1788_1801_1807]
EAAERKAAEAA	|B2RBV5|[98_100_93_100];|B2RBV5|[80_81_92_100];|B2RBV5|[91_92_92_100];|B2RBV5|[98_99_92_100]
DFGPADSKEVC	|O95602|[70_71_56_64]
AEDPLGVERPT	|Q96KM6|[668_676_661_662]
AEPEAESAIIY	|Q96CK0|[419_424_436_440]
AIVASFPKKQE	|P14406|[69_70_75_83]
YSEGYCSRAAL	|P34897|[96_100_80_85]
DTSETVNKERA	|Q86XL3|[323_324_290_298]
LTEVDKYVNSS	|Q9P2N7|[208_217_189_189];|Q9P2N7|[208_217_217_217];|Q9P2N7|[208_217_228_228]
YLHDQNPDAAI	|O14579|[127_136_126_126];|O14579|[127_136_155_155]
TSEDISQTSYK	|O94929|[461_469_447_448]
DRVQSAVGFEY	|Q14247|[130_132_134_141];|Q14247|[167_169_134_141]
IVFENTDSVHL	|P42696|[318_319_335_343]
PLCSPSEGTLS	|Q96KQ7|[424_427_395_401]
AIDSGASLLHL	|P57078|[461_462_484_492]
GFPTVAEFVAA	|P53602|[329_331_318_325]
DYGGFGGFGSY	|Q13151|[247_249_251_258]
KNEDGDVGAEL	|Q8IYB8|[90_92_77_84]
GLIDDKGTIKL	|P06493|[148_149_136_144];|P06493|[115_115_135_144];|P06493|[140_140_135_144];|P06493|[148_148_135_144];|P06493|[154_154_135_144]
VRFGPGVAFSY	|P08727|[23_31_3_4];|P08727|[23_31_5_6]
AEQDMSTHITA	|O43865|[123_128_152_156]
TAQLAADLLKY	|Q9UBT7|[400_401_403_411]
ALLDPVKGERL	|Q15149|[3846_3847_3871_3879];|Q15149|[3846_3846_3870_3879];|Q15149|[3854_3854_3870_3879];|Q15149|[3857_3857_3870_3879];|Q15149|[3863_3863_3870_3879];|Q15149|[3865_3865_3870_3879];|Q15149|[3866_3866_3870_3879];|Q15149|[3884_3884_3870_3879];|Q15149|[3901_3901_3870_3879];|Q15149|[3904_3904_3870_3879]
GSEHCFDLIFA	|P48444|[120_120_103_112]
YIISQVEGHQV	|Q9Y3C4|[109_110_123_131]
DTDKFKGFCYG	|Q15056|[77_86_56_56];|Q15056|[77_86_83_83];|Q15056|[77_86_103_103];|Q15056|[77_86_107_107]
AEYGEIKNIHI	|Q9Y5S9|[94_103_74_74];|Q9Y5S9|[94_103_89_89];|Q9Y5S9|[94_103_99_99];|Q9Y5S9|[94_103_102_102]
REYLIGQHVTA	|O94952|[398_399_365_373];|O94952|[387_387_364_373];|O94952|[398_398_364_373]
DTSSSFLFIDR	|Q9BZD3|[183_188_191_195];|P0CAP2|[183_188_191_195]
LRFDEPQLASL	|Q9H0C5|[175_176_190_198];|Q9BX70|[217_218_232_240]
KEKEALETDLY	|Q13426|[146_147_169_177];|Q13426|[169_170_169_177]
EERTVIDNTTY	|P23467|[100_104_73_78]
IRNKDRPAMQI	|Q9BZI7|[431_440_413_413];|Q9BZI7|[431_440_431_431]
STDHIPILYHF	|Q06210|[218_226_193_194]
DAVLAADSTAA	|P54922|[280_285_304_308]
GQAPDAAAWAA	|Q6VUC0|[67_74_100_102];|Q6VUC0|[67_73_99_102];|Q6VUC0|[67_72_98_102]
NGGKGLPEEGP	|Q15751|[3515_3520_3534_3538]
SESTAVGQAHA	|Q02952|[1618_1627_1603_1603];|Q02952|[1618_1627_1605_1605];|Q02952|[1618_1627_1614_1614];|Q02952|[1618_1627_1622_1622];|Q02952|[1618_1627_1626_1626];|Q02952|[1618_1627_1637_1637]
EAKAGMSAEQA	|Q9Y2Q3|[173_174_144_152]
ALADLQEAVLK	|Q9C0D5|[1389_1397_1365_1366]
AERDVYTGDSA	|P20618|[211_219_209_210]
ALQQALSNGTW	|O75340|[51_52_49_57];|O75340|[51_51_48_57];|O75340|[78_78_48_57]
EPEAEASAIIY	|Q96CK0|[420_425_436_440]
LTLDLPGHESL	|Q9Y5M8|[113_115_117_124]
LEDAAQHLSDY	|Q9NWN3|[511_515_489_494]
YVDGGSHSMRY	|P30466|[51_54_25_31]
SEIDMNDLHQA	|P04083|[304_310_282_285]
AEYGEIKNIIH	|Q9Y5S9|[94_102_89_90];|Q9Y5S9|[94_102_102_103]
YQDPLDGDRLV	|Q8NI35|[703_708_734_738]
TIDDPTKQTFK	|Q96RF0|[279_287_289_290]
FLGDDVFLREI	|P06737|[525_534_504_504];|P06737|[525_534_508_508];|P06737|[525_534_558_558]
LEDPLTGEWHY	|Q9BZF1|[709_710_735_743]
KVQCAESPDGPG	|Q08378|[42_47_57_62];|Q08378|[42_46_56_62]
MSICSSLKTCAT	|O95861|[56_62_40_44]
REQSVPGAEVLA	|Q8IVB5|[283_290_258_261]
ITDPSSPTISSY	|Q8IX90|[349_349_342_352];|Q8IX90|[367_367_342_352];|Q8IX90|[371_371_342_352]
LTATSASQDIEY	|Q6P3R8|[542_552_573_573]
ASDKETAQFQHL	|I3L3R5|[173_182_158_159]
MRDASLLQFKEL	|O95544|[113_120_122_125]
SEQSVSGSTATA	|P41134|[36_40_5_11]
IGEAMSPSDLAS	|Q12802|[611_621_586_586];|Q12802|[611_621_598_598];|Q12802|[611_621_616_616];|Q12802|[611_621_618_618];|Q12802|[611_621_635_635];|Q12802|[611_621_639_639];|Q12802|[611_621_640_640];|Q12802|[611_621_644_644]
WSDSSGGKGGSY	|P13747|[346_349_334_341];|P13747|[346_348_333_341]
AGEPIASFTDSF	|P0C091|[1479_1487_1509_1511]
NIDAVHDITVAY	|Q6UWP7|[264_265_252_261]
PEAAEGAAELEP	|P12755|[715_718_721_728]
SGDHQSPSSSSY	|O43298|[159_160_139_148]
PSSVPSAFSESF	|Q14004|[1401_1404_1393_1400]
NLIDAGVDGLRI	|P20839|[312_322_290_290];|P20839|[312_322_300_300];|P20839|[312_322_314_314];|P20839|[312_322_330_330];|P20839|[312_322_332_332]
LLDNGVTKGFVY	|Q6XZF7|[1306_1307_1330_1339]
ADIKSIPLDTFL	|Q6PL18|[637_642_619_624]
ALWDIETGQQIS	|P16520|[167_176_200_201]
QPPRASHVDNEY	|P06127|[455_458_446_453]
WLGPREALQRLW	|Q96IT1|[70_71_55_64]
QEQDCVVASVPS	|Q86YV5|[1083_1089_1056_1060];|Q86YV5|[1083_1088_1055_1060]
LTDQSVGSSTRY	|Q9Y2K7|[1077_1081_1088_1094]

## Sheet: HCC1143 nonspliced
sequence	annotation
LSGGPGDGP	|Q13263|[827_835]
KGKGVGSAR	|Q92785|[186_194]
SASSPSPSF	|Q9Y6W5|[254_262]
PAPPPPPPP	|Q12830|[22_30];|Q3C1V1|[72_80];|Q9UQB3|[218_226];|Q9C0D6|[32_40];|Q9Y661|[5_13];|Q9UMN6|[2251_2259];|Q96Q04|[751_759];|P56270|[131_139];|Q7Z7M0|[2530_2538];|P06400|[21_29];|Q70E73|[936_944];|Q8IZ40|[435_443];|Q9Y467|[158_166];|Q9NTN9|[763_771];|Q2VWA4|[693_701];|Q9Y4A5|[504_512];|Q9Y6W5|[320_328];|P19544|[58_66];|Q5EBL2|[269_277]
LASGPDPAF	|Q9NRD9|[197_205];|Q9NRD8|[203_211]
AGITGVSHR	|Q9NV72|[27_35]
AVKVGLVGR	|P58107|[1303_1311]
SAFVPSSGR	|Q5GLZ8|[307_315]
ASGPIRPIV	|P26373|[51_59]
ADMAHISGL	|P34897|[250_258];|P34896|[227_235]
SAEPSPTVM	|P49023|[126_134]
SGFGSPRLV	|A1L390|[627_635]
SADPLNSAF	|P42285|[555_563]
SDLSRASSV	|Q96RV3|[606_614]
AEGPPRLAI	|Q15773|[224_232]
ISSGAVVHR	|Q9BXK1|[19_27]
APAPSTVHF	|Q13118|[111_119]
SSVPGVRLL	|P08670|[72_80]
VFDPVPVGV	|Q08211|[698_706]
SAAAIKRIV	|Q5SW96|[67_75]
SSSGPQRLV	|Q8N511|[47_55]
SDAERALAV	|Q9NX74|[91_99]
AMATVTALR	|P04075|[250_258];|P09972|[250_258]
STSGIVRTL	|Q9HCU4|[868_876]
SEGPPLTSF	|O95071|[2161_2169]
TVYGAVRAV	|O43251|[291_299]
GGKYQGTIL	|Q02413|[457_465]
GDSVKASKF	|Q96FT9|[65_73]
AAAVLSHNR	|P04844|[258_266]
IVKPPASAR	|Q14679|[719_727]
NADAIVVKL	|Q7KZF4|[352_360]
VTQNSPAAR	|Q09666|[37_45]
ASTPVAREL	|Q9NVU0|[554_562]
AELERAAAL	|Q8NAF0|[465_473]
ASKPVTNAR	|P21333|[218_226]
KLPSGSKKV	|P62917|[149_157]
AASSIQRVL	|Q5I7T1|[124_132];|Q5BKT4|[124_132]
AIVASDTRL	|P20618|[49_57]
LPAAAQDVY	|P04843|[284_292]
APDAKSFVL	|P09382|[25_33]
HSVIPPAAR	|Q9UIG0|[1292_1300]
DPVGDIVSF	|Q96CS3|[131_139]
ASLGNLFAR	|Q92520|[33_41]
KESPTSVGF	|Q14781|[518_526]
RDHAVVVGV	|P22087|[304_312];|A6NHQ2|[316_324]
SDGNRVSAF	|P52756|[323_331]
AENARSASF	|Q9UQC2|[203_211]
AVQVPVKGR	|Q5JSZ5|[1584_1592]
SSYSPTTGR	|Q13009|[355_363]
ATAVAHCKR	|P62249|[19_27]
REKPPSSGV	|Q14241|[316_324]
AVIDVGINR	|P13995|[270_278]
ATVGLIRNL	|P35222|[509_517]
TDGPPPVQF	|Q9Y6X3|[591_599]
TGNPVVTNR	|Q9HCE1|[262_270]
ISKGANVNR	|Q8IWZ3|[621_629];|O75179|[650_658]
SADNPSHAY	|Q9Y2W3|[209_217]
GSYLPPTAR	|Q9UKK3|[1324_1332]
HSNPPPASR	|Q8NF64|[837_845]
ADLVHSAHL	|Q96S97|[309_317]
AVKAAGKYR	|Q9NTK5|[361_369]
KSKSSSVSR	|Q01130|[170_178]
GRYGGETKV	|Q16629|[5_13]
AALTVHQAR	|Q96GQ5|[212_220]
AGKSVHVLR	|Q96S66|[353_361]
SPAEDKSSF	|Q9H7S9|[146_154]
QAEGSLTVY	|Q96S52|[137_145]
YGSTGIRDV	|Q9BZ23|[258_266];|Q9H999|[58_66]
GDLSRHLGL	|Q8IZT6|[938_946]
SRHPTGNSI	|Q5VZ89|[494_502]
HSGPVIPVY	|Q14469|[240_248]
LPAVGEHVF	|O00257|[3_11]
AVKPDGVQR	|Q13232|[27_35];|O00746|[43_51]
HAEATIVVM	|P57735|[113_121]
ATIGLIRNL	|P14923|[500_508]
KAKKPAATR	|Q02539|[155_163]
NPDPDAETL	|P13928|[22_30];|Q5VT79|[22_30]
ARADAAKRL	|Q9UM47|[1850_1858]
SRAKAVRAL	|Q13765|[191_199];|Q9H009|[191_199];|O15069|[1538_1546];|E9PAV3|[2054_2062]
HADPSLVSF	|O15350|[488_496]
ISKEVLAGR	|Q00839|[434_442]
AATTVLRQL	|Q9UKL0|[330_338]
SDLPRTDGL	|Q6UB99|[1141_1149]
ADYVHSLGL	|P17050|[106_114]
STNNIAQAR	|Q9UBI6|[7_15]
SEAQRITGL	|Q9UHL4|[298_306]
KEALPKAAF	|Q13123|[496_504]
SSNSPISQR	|Q9BXB4|[178_186]
ATSPALFNR	|Q14204|[3080_3088]
STISSVRNL	|P15924|[2594_2602]
ARFSGNLLV	|P61619|[310_318]
SGKIIFVGR	|Q13310|[257_265]
QGKPAIAHR	|Q04771|[327_335];|P37023|[321_329];|Q8NER5|[314_322];|O00238|[323_331];|P36894|[353_361];|P36897|[324_332]
TTAAFIRVV	|P43686|[223_231]
NVDDPTGNF	|Q12907|[305_313]
SVSPVVHVR	|Q8WVV9|[73_81]
KDSSVAARF	|O43809|[56_64]
ARGPIQILN	|P30876|[1063_1071]
SSDPNAVMY	|P09237|[225_233]
GTKGNYTSR	|Q14134|[507_515]
GSSDVIIHR	|Q9P1Y6|[519_527]
ADHARTITV	|P49588|[299_307]
KRNIGVVVV	|O15270|[488_496]
VAAPEHISY	|B0FP48|[37_45]
VSSSVHSKR	|Q9H3Q1|[8_16]
KQLATKAAR	|P84243|[19_27];|Q6NXT2|[19_27];|Q71DI3|[19_27];|P68431|[19_27]
LPVVPKATY	|Q9H3Q1|[190_198]
KVGDKIATR	|P29401|[310_318]
HAELIASTF	|Q9UBB4|[271_279]
SDQIRSAVL	|P40939|[82_90]
ALKSSPTER	|P35869|[86_94]
KAKTKAVSR	|P0C0S5|[12_20]
AQFGGKILR	|Q9P1Y6|[159_167]
FRGPTVSNI	|Q9H7B2|[167_175]
FRVPTANVS	|P04406|[233_241]
RTFPGVASR	|Q9BWT1|[162_170]
SSKVTTVLR	|Q9H0E3|[242_250]
DTNADKQLS	|P06702|[67_75]
ASNPATFQR	|P0CG12|[379_387]
KLQPPPVGR	|P41162|[345_353]
GTWNSGTNR	|Q9ULX6|[32_40]
EPESLGVVY	|O15541|[92_100]
AAAERDVVY	|Q86W56|[891_899]
ASNPKFSSR	|Q9UKA4|[1618_1626]
TSATFLRVV	|P62191|[243_251]
QAAMPQVSY	|Q8ND90|[40_48]
TDFQVKGTV	|Q9Y6R0|[338_346]
ASRTPAVHR	|P48637|[156_164]
TRSGAVKIY	|Q15334|[53_61]
VVAPLLRKV	|Q6ZTW0|[160_168]
NVDVSDLSF	|Q93074|[1116_1124]
RTQGSFSGR	|Q7Z7N9|[30_38]
IKPGLVKKI	|Q9UPQ0|[61_69]
AGGDWFTSR	|P30153|[136_144]
HGIVEVDPM	|Q06481|[726_734]
KEDTGKTAF	|Q86XI2|[159_167]
ARHPFAQAV	|O43837|[307_315]
LPDPQNISL	|Q8WW01|[161_169]
TAEDPSKSY	|O14929|[274_282]
SSADLIRHV	|Q9BQA5|[78_86]
ARKGSPRLL	|Q9H7Z7|[51_59]
SADEPMTTF	|Q9Y2Y1|[86_94];|P23193|[280_288];|O75764|[327_335]
FPAAIEHTI	|A0AVT1|[630_638]
HAVIDINAF	|Q13572|[291_299]
FASGLIHRV	|Q8N6L1|[84_92]
ATQKLPVSR	|Q70E73|[117_125]
KALSQLALR	|Q9H211|[377_385]
HAAGFAYTY	|Q96PZ2|[556_564]
HPVVGDLTY	|Q9UJJ7|[185_193]
STFKPGHAR	|Q6ZWE6|[141_149]
VPVEEPIAF	|P53355|[864_872]
QDSVRLLAV	|P30153|[217_225];|P30154|[229_237]
AENQRITAV	|Q12996|[160_168]
ARNTVTQVL	|Q9P2B4|[501_509]
HPDESGSKF	|P56282|[155_163]
SVDQKTVAR	|Q9UQ35|[1522_1530]
LSSSVIREL	|Q8NEJ9|[201_209]
SDLPRFQAA	|Q6MZQ0|[33_41]
ANYAPAKNR	|Q8WU76|[251_259]
QDVARVLGF	|Q8ND90|[117_125]
AQYPKGRSV	|P56277|[40_48]
YRPISASVL	|P48201|[22_30]
GRYPEAQSV	|Q99615|[190_198]
NRYPASSLV	|Q9BXS4|[289_297]
AVYGKAQNR	|Q9Y646|[54_62]
AAYTEIRAL	|Q13535|[906_914]
ATSPIIIHR	|Q9UBD5|[253_261]
TGDPDVLEY	|Q13480|[39_47]
QVADIDGQY	|P35222|[78_86]
HTQPSPVSR	|O15018|[2471_2479]
FRSGSSRVL	|P60842|[318_326];|Q14240|[319_327]
KEMLPHVGV	|P30876|[345_353]
HAVTQLANR	|P78371|[419_427]
SDLVRHQGV	|O14771|[358_366]
SALSHVRKI	|Q3MHD2|[157_165]
KIIAPLVTR	|O00469|[412_420]
SAVEEKVSY	|Q96EK5|[375_383]
KTLPKIVGR	|Q9BPX3|[208_216]
SVLIPVTQR	|Q9P212|[9_17]
RVLDALVAR	|Q8IUR0|[64_72]
KQQGVLALR	|P56192|[191_199]
VMAPRTLIL	|Q9TNN7|[3_11];|Q29963|[3_11];|P30505|[3_11];|P30510|[3_11];|P30504|[3_11];|P30508|[3_11];|Q29960|[3_11];|P04222|[3_11]
KATNVVRLL	|Q9NYU1|[5_13]
HADGPVQQY	|Q99715|[2047_2055]
TAQTLVRIL	|Q12905|[313_321]
ATSPLQENR	|P52292|[60_68]
STTSHISKR	|P49023|[13_21]
ATKPMIEAR	|Q86SK9|[313_321]
GVMPSHFSR	|P39019|[86_94]
SADKPHLSY	|Q92828|[301_309]
LDTNADKQL	|P06702|[66_74]
RPAPVEVSY	|O75365|[6_14]
TTFPRPVTV	|Q15233|[216_224]
GTACGKYYR	|P62888|[82_90]
GTYAHTVNR	|P05187|[180_188];|P09923|[177_185]
HASLSEYVL	|Q99720|[97_105]
HSYSGLAKR	|Q9HCI6|[508_516]
AIDPNEPTY	|Q9H160|[206_214]
SEAERVSEL	|Q9UNF0|[88_96]
SPALELDKF	|Q9UHY1|[385_393]
VFDEAIRAV	|P15153|[168_176];|P63000|[168_176];|P60763|[168_176]
ADVLKVEVF	|P56537|[130_138]
KAKETVSTR	|Q9BW04|[250_258]
KVYGNIRAV	|Q9NRX1|[236_244]
IVNHPKVGR	|P55265|[1100_1108]
SPENSDPQF	|Q02153|[574_582]
TDAPHFYGL	|Q86VV8|[1252_1260]
AASENIFNR	|Q8TF05|[55_63]
NRYDGQVAV	|P22314|[449_457]
SVLNFATNR	|Q8TEM1|[1421_1429]
TTFGPKSQR	|Q13823|[142_150]
SAVDFIRTL	|Q9UEE5|[293_301]
KIGSFLSNR	|O95684|[225_233]
KTAATFARR	|P53621|[1119_1127]
QAESRAVVY	|P48553|[834_842]
REATGKITF	|O15182|[75_83]
SGKTTFVQR	|Q9HCN4|[30_38]
GLKQVIIPR	|Q86WA8|[794_802]
SQNSGFTQR	|Q8WV83|[58_66]
QAIEDMVGY	|Q99460|[527_535]
ASGDWFTSR	|P30154|[148_156]
HSSPPKARF	|Q9UM47|[2227_2235]
RVLTAPTLR	|A8MPS7|[275_283]
AQPDQTRIV	|P22087|[238_246]
RASAIIIQR	|Q8IZT6|[2067_2075]
SSLDKVHSR	|O94964|[1183_1191]
LRPSTVNEL	|P15924|[2228_2236]
VRNSINQVV	|P24928|[879_887]
KDVDRIIGL	|P35579|[613_621]
VTKNVSKPR	|Q9Y3U8|[17_25]
KIKTGVVKR	|O75347|[10_18]
GTNAHFVKR	|Q5THJ4|[982_990]
SSKIIIVNR	|A1L0T0|[367_375]
STKDSYSSR	|P38159|[215_223];|Q96E39|[215_223]
YSDDIPHAL	|P60228|[62_70]
HATFNDPVM	|Q9UL40|[191_199]
GTADVHFER	|Q86V81|[147_155]
AEQVRKSTL	|Q99700|[906_914]
APYFGAEDY	|P41252|[325_333]
LPAREATQF	|Q14393|[33_41]
AAYGYGIRY	|P11216|[154_162];|P06737|[154_162];|P11217|[154_162]
KSLESINSR	|P62888|[9_17]
SDEERASKL	|Q8TAE6|[121_129]
HAKSVIHSR	|Q99973|[552_560]
AFDIAEKEL	|Q7RTP6|[582_590]
ATKNGILYR	|P26358|[926_934]
NAAAEEIRY	|Q9BZE2|[152_160]
SDLVRSTQM	|O60269|[122_130]
AQGPTPRYF	|O60427|[12_20]
TQNGGLYKR	|O15270|[49_57]
SSHLKAHTR	|Q13118|[383_391]
KRHGKAIKV	|P35573|[1314_1322]
DPEGSRITY	|Q9Y530|[8_16]
TAVDKDNKF	|P58107|[1394_1402]
IPDKFVVGY	|P00492|[183_191]
AFHPQPVSR	|Q96JA1|[946_954]
ARHSLLQTL	|P46060|[576_584]
ERPAIVQNI	|Q9UL63|[63_71]
VRPKVVRSV	|P25205|[137_145]
KVKPKGKVR	|Q96T23|[836_844]
FPEGSVELY	|P23396|[79_87]
SDLSHFHVV	|O60287|[111_119]
KYATSVSER	|Q6WKZ4|[51_59]
IRPDINVDV	|Q9H6R4|[172_180]
QRAVAINRL	|Q9H1D9|[49_57]
KVAVKILNR	|P54646|[41_49];|Q13131|[52_60]
SDYGRPLSF	|O15357|[1160_1168]
FSPTKVISY	|Q15612|[86_94]
KTTKPPTLR	|Q5T036|[242_250]
SRHESVSKI	|P15924|[2585_2593]
AEQLRAELL	|O15049|[465_473]
QPQANSHVY	|P28749|[871_879]
HPDLVSQTF	|Q5U651|[764_772]
ADSLRLQQL	|Q13813|[781_789]
KSIANLIER	|Q9BUI4|[441_449]
KSTQPLNTR	|Q7Z5K2|[666_674]
ASKDLKVKR	|P0C0S5|[73_81];|Q71UI9|[73_81]
TFDASRTTF	|P49757|[181_189]
ADKIESVHF	|Q96A33|[325_333]
ADHSHVFSF	|P05187|[378_386];|P09923|[375_383];|P10696|[375_383]
HADVSNQLY	|P21281|[415_423]
SDNIRIETV	|Q8TEM1|[383_391]
VDQERSLSL	|O15417|[705_713]
REPQATVVF	|O15230|[1281_1289]
VFDPVQKTL	|O94776|[132_140]
KLSGFPKNR	|Q6ZMR3|[149_157]
KVFVAGRNR	|P46060|[183_191]
RDVQKVVGF	|P53992|[741_749]
KVIAGLYQR	|P78527|[3372_3380]
NSFNSPRNL	|O15371|[304_312]
QSPDFVRTV	|Q6PIJ6|[723_731]
ATQAVFQKR	|Q92696|[31_39]
VRYPGTTRV	|Q8N9I9|[258_266]
KVAGIYREL	|Q5PSV4|[118_126]
KVLGPIHER	|Q9H3H5|[369_377]
AQKKASFLR	|P46777|[281_289]
IRGSVVRYV	|Q9Y333|[62_70]
NTDEPPMVF	|P54578|[21_29]
MPDVVVRSF	|Q6P2C8|[258_266]
GTMTRQISR	|Q8IZP0|[312_320]
SVYGKLRKV	|Q6IA69|[599_607]
AGNYAWVNR	|Q9Y3I0|[313_321]
NVIRDAVTY	|P62805|[65_73]
KESPPHEDL	|Q9UPW5|[123_131]
RESHTHVSV	|Q9HAU5|[299_307]
ADLTRVETF	|O95744|[161_169]
KYTSQIVGR	|Q9UNS2|[243_251]
KINSLAHLR	|P11309|[96_104]
HAHLDIEAF	|P00966|[292_300]
HSKTHTSVR	|O94887|[369_377]
TVRDHLVGR	|P11216|[59_67];|P06737|[59_67];|P11217|[59_67]
AGQKGYHHR	|P39023|[269_277];|Q92901|[269_277]
SSNLIVHQR	|Q14586|[392_400];|P13682|[346_354];|Q9HCX3|[515_523];|Q68DY9|[334_342]
VYDTNPAKF	|Q9NZD2|[59_67]
KEGEFVAQF	|Q9UQ80|[311_319]
SPNAKEFVY	|Q14106|[254_262]
KYFEGVSPK	|P78527|[681_689]
ADLARFYTV	|Q96S38|[9_17]
SSNLITHQR	|Q9C0F3|[430_438]
LINNKIANR	|P51665|[275_283]
KTKLPVTLR	|Q96JB2|[758_766]
TRVKAVRIL	|Q9H3M7|[39_47]
RTLGLLVKR	|Q8TEW0|[297_305]
TPDEPDVHF	|Q9UQF2|[448_456]
LPDADKERL	|P12814|[558_566]
ATATVYFKR	|P24863|[63_71]
RQTGIVLNR	|Q13435|[59_67]
RVITALVER	|P52732|[297_305]
ATYGAYKQR	|Q86VI4|[233_241]
ALNEEIVNR	|Q9UPN3|[5498_5506]
KDSSRHSKL	|Q14469|[67_75]
SRSLVLNRL	|Q8IXZ2|[571_579]
YFDPANGKF	|P13639|[265_273]
RVYSGHQGR	|Q9NR30|[432_440]
ADSIRQQEL	|Q9BV73|[1074_1082]
TRTDKVRAL	|P61619|[222_230];|Q9H9S3|[222_230]
KEPPEVQSF	|Q8IX03|[1083_1091]
SYKGSISYR	|Q6SPF0|[86_94]
TVKETKAKR	|O60216|[312_320]
KVKTTKVTR	|Q7Z5A8|[125_133];|Q96LR4|[132_140]
FPHTPDNSF	|Q09328|[415_423];|Q3V5L5|[430_438]
NAQRQDIAF	|P07355|[65_73]
ADAERLFQL	|Q58EX7|[553_561]
ADSFKADYF	|P41229|[401_409]
KDNERVVGF	|Q16881|[580_588]
HPATAEYEF	|Q16082|[10_18]
AEQQITEVF	|P46013|[3101_3109]
VTYQDIRAV	|Q14209|[250_258]
AVKVKHVKR	|Q9P0U4|[324_332]
KGFYIPKGR	|P04798|[397_405]
SAYAFSHQR	|O43520|[1207_1215]
GTNYIETLR	|Q9Y6A4|[145_153]
SDLRHLRAV	|P62491|[126_134];|Q15907|[126_134]
KALGKHKER	|P52597|[167_175]
AEPYPTSRF	|P24468|[188_196]
TAVIDHHNY	|P39656|[154_162]
RDSLYVNGF	|Q8WXI7|[13276_13284]
RSYVTTSTR	|P08670|[28_36]
HPDKKIVAY	|Q9UBB4|[168_176]
LQNVNITLR	|P35232|[85_93]
SHPNKVKVY	|P21333|[767_775]
KTLLVNNNR	|P09661|[67_75]
ERASLLRQV	|O95751|[36_44]
KLNEVIVTR	|Q9UP95|[1024_1032]
KRTLLIKTV	|P08670|[439_447]
QDNLRQLSV	|Q96HR3|[79_87]
SQKPVMVKR	|P46779|[120_128]
KSLLVQTKR	|P39023|[349_357]
STLNKLIKR	|Q13438|[495_503]
TVDARVYSY	|Q9UKK9|[192_200]
KDQERVAEV	|Q96CN5|[561_569]
SDLQRTQLL	|Q8IXJ9|[689_697]
KAFKQPAKR	|P46013|[2883_2891]
VTQEIVTER	|Q14126|[902_910]
FRPSQTQVL	|Q8N414|[178_186]
VFKEEGVLR	|P39656|[299_307]
FVKDSIRLV	|P60059|[14_22]
RVQVVGTYR	|P25205|[234_242]
RVNVTGIYR	|P33991|[387_395]
HDVEDAETY	|Q96D15|[153_161]
HFNAPSHIR	|P61254|[18_26]
HSMALIHNR	|P33991|[335_343]
HADYQSPVY	|Q8NFZ4|[471_479]
TTKMSLNER	|Q9Y3Y2|[14_22]
EAQAEIEQY	|O75348|[39_47]
TFDDIVHSF	|P49327|[545_553]
HAANQSYQY	|O43707|[5_13]
DPFVDRIGY	|Q5SRE5|[259_267]
SSKNIFTER	|Q7Z333|[692_700]
SAKSIYEQR	|Q8TE68|[14_22]
ALNGKIYFR	|Q9H7B2|[188_196]
VGQSKIFFR	|Q7Z406|[780_788]
IGQSKVFFR	|P35579|[756_764]
KSMTLPSYR	|Q6WKZ4|[391_399]
RDHLQPAVF	|Q2NL98|[157_165]
TRIPKVQKL	|P0DMV8|[341_349];|P0DMV9|[341_349];|P17066|[343_351]
HFDPEVVQI	|Q9NS73|[144_152]
STQLTIHQR	|P17097|[537_545]
KYFEKAGLK	|P25815|[87_95]
KTHNLLTTR	|Q96PD7|[146_154]
RLAVRTVIR	|Q9BYC9|[40_48]
KQAEIVKRL	|Q08117|[77_85];|Q04725|[76_84];|Q04727|[83_91]
SLYHQPANR	|Q8N3R9|[470_478]
IVNENLVER	|Q7LG56|[102_110];|P31350|[140_148]
TYKPVKHGR	|P62841|[122_130]
HPAQDDRTF	|Q12756|[1229_1237]
RDLERGVEI	|P17844|[212_220];|Q92841|[289_297]
SVLKELQNR	|O60287|[1082_1090]
KQQEIVVSR	|Q15393|[26_34]
KTTKKIVLR	|P83881|[61_69];|Q969Q0|[61_69]
SEYARPHVM	|P54259|[887_895];|Q9P2R6|[1257_1265]
HLNSHVRQV	|P56270|[351_359]
KEAQRIMTL	|Q9BTL4|[5_13]
QTKPVVVYR	|Q9NRZ9|[713_721]
MPEPDAQRF	|O14757|[102_110]
RYLGGIKKR	|Q9BUQ8|[253_261]
NPDASYVYY	|Q9Y617|[143_151]
HVDQDLTTY	|Q00534|[100_108]
SSNPYLVRR	|O94776|[18_26]
FVSEVQRKV	|Q9BYN8|[74_82]
TYYGSFVTR	|O15372|[123_131]
KVYELQASR	|Q9Y262|[70_78]
RVIAIRPIR	|Q86WA8|[241_249]
KTTTVKFNR	|O14737|[105_113]
KSNLIVHQR	|P17025|[610_618];|Q8NDW4|[504_512];|Q06732|[761_769];|Q14587|[624_632];|Q06730|[760_768];|O94892|[413_421];|Q8N883|[327_335]
RVNIPKVLR	|P53675|[1342_1350];|Q00610|[1342_1350]
YVGPTRQQF	|Q562E7|[1257_1265]
RDLVHRQTA	|O75533|[1180_1188]
KILGPFHKR	|Q9NTJ3|[99_107]
HSDPESDFY	|O94864|[131_139]
NPAYPESRY	|P14921|[146_154]
ATYPYQVVR	|Q9H2D1|[241_249]
VMFDKITSR	|P23921|[13_21]
TRIPKIQKL	|P11142|[341_349];|P54652|[344_352]
GSKLFFDKR	|O15371|[273_281]
YAIHDETSY	|P51587|[592_600]
HPSLQPEEY	|Q13438|[247_255]
AELLRHDFV	|Q9H2K8|[269_277]
REEKRVLGL	|P14678|[61_69];|P63162|[61_69]
QPDQDITHF	|Q9UPN3|[4249_4257]
ADYVRSKDF	|Q9Y5U8|[10_18]
SFKAELSYR	|Q14247|[426_434]
RLKPFGVQR	|Q9UBQ7|[171_179]
KTLLITKKR	|A1L390|[325_333]
DADFDEVQY	|O15372|[91_99]
KENEGLHQF	|Q9Y664|[174_182]
RYSSAFTNR	|Q9H0U3|[105_113]
KDFNRAFGF	|P61457|[41_49]
KQNDTKVLR	|Q96ST3|[737_745]
VVNPLFEKR	|P62424|[27_35]
SFDDTNEKF	|O75132|[640_648]
HDHPHALEF	|Q9BRS2|[348_356]
RESLPPEQF	|P40855|[207_215]
KDSKRVEQL	|Q9Y592|[197_205]
VVYPKVIER	|P30566|[363_371]
RELERQSSV	|O75044|[958_966]
YPAHDYHGF	|O95571|[192_200]
KVYDKAINR	|Q6KC79|[2574_2582]
IRSSYIRVL	|P33992|[289_297]
KYNNQLATR	|P06756|[233_241]
RYSVIVKSR	|P48507|[249_257]
RVVHIIQSR	|Q58F21|[532_540];|O60885|[632_640];|Q15059|[594_602]
FPDKPITQY	|P39656|[225_233]
RTNQFSVTR	|Q9Y282|[296_304]
KSQLIVHQR	|Q96RE9|[281_289];|Q14587|[484_492]
KYIEKVSSR	|P49736|[534_542]
ASYKWNVSR	|Q6P2Q9|[1633_1641]
YFDPKQTDV	|Q14204|[1845_1853]
SFDKSIRIF	|Q9NV06|[301_309]
TYLTKFIAR	|Q9HCS7|[559_567]
RVQVQVVER	|O75955|[253_261]
KQLKVKVNR	|Q9NUG6|[93_101]
YRFGDSQQL	|Q9UPN3|[7149_7157]
TRYQGVNLY	|P11940|[289_297]
KQLGYSVYR	|P61599|[124_132]
RSNPKIWNV	|Q9Y262|[216_224]
QVKDVQKLR	|Q8TDN6|[282_290]
HAFVDLHEF	|Q99418|[127_135]
RYFDTAVSR	|Q29865|[30_38];|Q29963|[30_38];|P10321|[30_38]
ITKPVHKHR	|P61313|[151_159]
KSKDLLKQR	|P28290|[716_724]
TDLEQVHQF	|Q14678|[675_683]
SFHGKTFHR	|Q9UKL0|[205_213]
YYDGKVMKL	|P11387|[241_249]
STARHLYLR	|P39019|[59_67]
KSQEKKITR	|Q92547|[178_186]
SYKDFSESR	|P14866|[473_481]
AWKSWTALR	|Q96JJ7|[3_11]
RNYVTPVNR	|P62993|[207_215]
KELQRFKAV	|Q96FW1|[109_117]
ASFLRKNQR	|Q86VP6|[656_664];|O75155|[658_666]
KWEAEPVYV	|P25311|[167_175]
SVNELIYKR	|P18124|[149_157]
KELIRHNLV	|A0AVF1|[257_265]
HTDPVDYEF	|Q96MG7|[240_248]
KLYNKITSR	|Q92989|[198_206]
KSQLIIHQR	|P17025|[554_562];|Q86UQ0|[260_268];|Q96RE9|[477_485];|P17031|[438_446];|Q2M218|[275_283];|Q14587|[540_548]
QRHEIVQTL	|Q13228|[234_242]
KSQLIIHER	|Q14587|[400_408]
LPQEAFEKY	|Q9UQE7|[949_957]
TADHRIYSY	|Q96CS3|[73_81]
SPDRVYINY	|P14174|[91_99]
VLYDQPRHV	|Q93074|[724_732]
RDQLRPTQL	|Q9NZM1|[1668_1676]
AVKQKQIRR	|Q9NX24|[54_62]
NRYDGIYKV	|Q96PU4|[582_590];|Q96T88|[553_561]
TFNKLVSYR	|Q9UBC3|[291_299]
KRAEEILRL	|Q9NRS6|[327_335]
RLKQKVAER	|Q9UQL6|[268_276];|Q9UKV0|[229_237];|P56524|[255_263]
STDYETHEF	|Q16585|[181_189]
HAFVELHEF	|Q15438|[128_136]
LRSDIQKRL	|P46379|[1102_1110]
SESERVEFF	|Q93074|[586_594]
FTDEESRVF	|Q9NYF8|[340_348]
ITNKDVRKR	|P60228|[262_270]
KELKRSKKL	|Q96EU6|[227_235]
TDNQRQQQL	|P38432|[431_439]
QPNPVEQRY	|Q13496|[549_557]
HDLERKYAV	|P55209|[100_108]
AVHRLLEHR	|Q8IWF2|[408_416]
RLKEKLTSR	|Q12965|[318_326]
KEQERISEL	|P49454|[2499_2507]
RYRLPVATR	|Q9Y4C2|[471_479]
KRFSEPQKL	|O94885|[898_906]
RDAERVKEM	|Q99459|[526_534]
RFVNLISER	|Q9Y4W2|[121_129]
KSFQKIQVR	|P62081|[70_78]
ATRKNLFER	|P54132|[481_489]
QDVKKIEKF	|P49458|[57_65]
KINLIIHQR	|Q9ULD5|[558_566]
RSYPVTEQR	|Q8IYA6|[319_327]
QYSNNIRQL	|P22314|[717_725]
IYQSKVREL	|P25205|[31_39]
KYIDKTIRV	|Q9UK45|[17_25]
KIKKFSKTR	|P25205|[283_291]
HADEYLEVY	|Q9Y2W6|[303_311]
RVQDHIQSR	|P16118|[231_239];|Q16875|[226_234]
FYDERIVVV	|Q9P265|[854_862]
YVPEHVRKL	|Q6NSJ5|[644_652]
GVKKPHRYR	|P84243|[35_43];|Q16695|[35_43];|Q71DI3|[35_43];|P68431|[35_43]
RLYTKFSAR	|Q9UJ83|[132_140]
RVQEQVRAR	|Q9Y446|[45_53]
TPHDFIEHF	|P24385|[156_164]
ASKEQYYVR	|Q8TD16|[108_116]
KQKQDVIER	|Q8IY18|[339_347]
RQFEGRHSK	|Q6P2Q9|[658_666]
KLQDERTVR	|O14818|[52_60];|Q8TAA3|[54_62]
RESEQRPPF	|Q08345|[890_898]
RELARQKNM	|P84101|[7_15];|O75920|[7_15]
KVYLPNKQR	|P10398|[22_30]
KAKNIFRIR	|Q7Z628|[461_469]
SYREHVKEV	|Q9P2E9|[765_773]
KYIDNPKLR	|Q92499|[311_319]
YRQKQVVIL	|Q9BZX2|[51_59]
AYAEYVIYR	|O95271|[1288_1296]
YQFTGIKKY	|Q96IX5|[10_18]
LPDEIYHVY	|Q9BV86|[210_218]
RELQHEHSL	|Q14517|[885_893]
RELQKLSKF	|O14965|[220_228]
RYQSKLQAR	|Q8NFH5|[214_222]
RYITTVIQR	|Q06190|[844_852];|Q9Y5P8|[260_268]
YGYDNVKEY	|Q96GN5|[434_442]
HPLDYELTY	|Q9ULT0|[230_238]
KDLPHWNKL	|Q7LG56|[73_81]
HSDQQVFEY	|Q969X6|[545_553]
QDYQRLMTV	|Q6ZUT9|[301_309]
QTKPVYVYR	|P46100|[2156_2164]
YPDRIMNTF	|P07437|[159_167];|Q9BVA1|[159_167];|Q13509|[159_167];|Q13885|[159_167];|P68371|[159_167]
FPEEDKKTY	|O95298|[100_108]
YYDEKVVKL	|Q96GW9|[386_394]
RYNGLIHRK	|P46779|[39_47]
SYNYEIVNR	|Q14204|[3376_3384]
REQEQRQAL	|Q9BYN8|[129_137]
RVLYPRVVR	|P46695|[64_72]
QPAFDFDRY	|Q86WB0|[129_137]
LRNEKEQEL	|P11388|[1147_1155]
RDYQHENVV	|O96013|[371_379]
RAQLPKYQR	|O43670|[376_384]
RFQSSHRSR	|Q9Y446|[253_261]
KVNDSWKER	|P49454|[1984_1992]
RAFQWAVQR	|Q4LEZ3|[65_73]
RYIEGLKKR	|Q9NTU4|[184_192]
RIIEKVIHR	|Q14566|[771_779]
RTKEAEFQR	|Q7Z2Z1|[423_431]
MADYPDYKY	|P35716|[110_118];|O15370|[101_109];|Q06945|[120_128]
ARYPEKRFV	|P35968|[163_171]
KESTTKYYF	|Q8TCY9|[377_385]
NRPNLYYEV	|P46063|[282_290]
HTFDHINKR	|Q6ZT12|[1872_1880]
NYIDKVRFL	|P08670|[116_124]
REALKKYLF	|O95376|[359_367]
KYPEKFNSR	|P23743|[543_551]
VTFKNYIKR	|P55060|[64_72]
RDYEKAIKF	|Q7Z4L5|[898_906]
IPYQDRESY	|Q9H2Y7|[109_117]
KAKLYHKQR	|O95478|[46_54]
RYSDRFSSR	|Q13243|[84_92]
SEHERQYLL	|Q9NVU0|[218_226]
VIKDKFIRR	|Q8NFZ0|[803_811]
RTNIFQIQR	|Q7Z6Z7|[3297_3305]
SQNPRFYHK	|Q13227|[319_327]
QTFLRVQER	|Q15906|[143_151]
YPTEDYKVY	|Q9UL33|[62_70]
KYFDKASYR	|P29401|[140_148]
RTSFFHVKR	|Q96CW1|[52_60]
LQKDKQVYR	|P63092|[30_38]
RVYSIQKKR	|Q13112|[196_204]
YANYYTREV	|O75533|[761_769]
TAYRPDWNR	|Q8WWX9|[25_33]
YRFETVQKL	|Q99829|[66_74]
KRYKSIVKY	|P14324|[257_265]
KYLTKKYLK	|Q6P5R6|[78_86];|P35268|[84_92]
SFKDYIQER	|P15036|[330_338]
QDIERIHQF	|Q8TDB6|[179_187]
LRIYHEQQV	|Q5UIP0|[2358_2366]
RSYLIIHQR	|Q8NF99|[325_333]
RVWLGKHYK	|Q92922|[56_64]
RLFEQNVQR	|P61081|[158_166]
VDHEKIYRM	|Q13907|[219_227]
RSHLKQHER	|Q14592|[348_356]
KRFEKQKEV	|Q9Y6A5|[727_735]
YAQKYDEEF	|P55060|[278_286]
REQEHTFVF	|Q9H329|[335_343]
FPDETHERY	|O43292|[114_122]
SYRKFLNLR	|Q8NEM2|[257_265]
QEMPRYHEL	|Q92692|[449_457]
SLFYKKVYR	|P06400|[648_656]
RYYAPVRQR	|Q14202|[1256_1264]
RLHDRIVFR	|Q9NVS9|[225_233]
QQLYWSHPR	|P62273|[4_12]
KQRLKEEQR	|Q9UGY1|[50_58]
RIYQYIQSR	|Q13627|[317_325];|Q9Y463|[269_277]
RVQPEYQRR	|Q92546|[264_272]
YPDQYVREY	|P42338|[614_622]
KTYNYPKYR	|Q00536|[396_404]
RENNYTYEF	|Q32P41|[266_274]
HRYPNQVYY	|P04156|[155_163]
RQYENFINR	|O60437|[253_261]
SYYKDHHHR	|Q5SXH7|[54_62]
QQKHQYQQR	|O15372|[272_280]
RDYEHQFHL	|Q15276|[126_134]
TYKYFKDYR	|Q3ZCQ8|[115_123]
GSFDATGSGF	|Q15149|[4641_4650]
VPAAPTPVAY	|Q9H6T0|[616_625]
QAGNEAGRFG	|Q6UWP8|[162_171]
ARSAAASNYV	|O14493|[200_209]
TADPGATMTF	|Q14565|[271_280]
FPDSPGGTSY	|Q9Y6M9|[82_91]
SADPSGAFRM	|Q13751|[708_717]
VQKPGFGVGR	|Q13283|[451_460]
HPNLVVGGTY	|O14576|[352_361];|Q13409|[344_353]
NPSAADLVHF	|Q12929|[351_360]
KGKSPASVFR	|Q32NC0|[155_164]
RTNGSALCTR	|Q13045|[1060_1069]
AQHDAPVKTI	|P78406|[124_133]
YAAPAPEQAY	|Q96CS7|[135_144]
HPIEGSTTVF	|P49327|[2248_2257]
TDGPNERIGM	|P52292|[279_288]
HAEASAIVEY	|Q15397|[248_257]
SGSALLQHQR	|A8MQ14|[460_469]
SPASDTYIVF	|Q13765|[114_123];|E9PAV3|[1977_1986]
SPPEVPEPTF	|Q9NQG1|[8_17]
RVKLPSGSKK	|P62917|[147_156]
KTKDPTAALR	|Q96PZ0|[427_436]
LDTNADKQLS	|P06702|[66_75]
RQNPSLPAAR	|O60346|[673_682]
HPTIIGESVY	|Q96IP4|[256_265]
STKKGPLTKR	|O00178|[593_602]
HSQALSGRLR	|P31941|[182_191];|Q9UH17|[365_374]
FPDTGSDHSY	|Q96EK4|[237_246]
AYKNVVGARR	|P31946|[49_58];|Q04917|[48_57];|P61981|[48_57];|P63104|[47_56]
IEKGHGIRLL	|P15924|[2359_2368]
YPDPYGGEKL	|P58107|[122_131]
SPDEKSVITY	|Q03001|[237_246];|Q9UPN3|[280_289]
DPDTAEYVAY	|P29353|[267_276]
HPDAPMSQVY	|Q9UBU8|[288_297];|Q15014|[214_223]
KVDENGKISR	|P62979|[107_116]
KSRGVAYKSR	|P63272|[102_111]
NAARSQLETY	|Q86VS8|[362_371]
KSSDIAKTFR	|P13797|[85_94]
AQNPSLHHPR	|O95071|[404_413]
AAFEAKEETY	|Q03001|[6534_6543]
TEKDSYVVAF	|P10155|[406_415]
RTVEGALKER	|Q16891|[275_284]
NADGTYQVEY	|O75369|[1285_1294]
MPVDPNEPTY	|Q8WYH8|[179_188];|Q9UNL4|[189_198]
VVKDITNAFR	|Q7Z6K3|[15_24]
LPDPEKPVRL	|A6NHR9|[1362_1371]
YPDPYSRASL	|P58107|[1327_1336]
RVRDIAIATR	|Q5T9A4|[327_336];|Q9NVI7|[375_384]
RTKQVEGVTR	|Q8N4C6|[1131_1140]
RVLEGFIKGR	|Q96HD1|[411_420]
NPDPNEIKSY	|Q13907|[162_171]
RVRQSPLATR	|O75381|[40_49]
RYRPGTVALR	|P84243|[41_50];|Q6NXT2|[40_49];|Q16695|[41_50];|Q71DI3|[41_50];|P68431|[41_50]
HPFTNKPTTF	|Q8N983|[131_140]
VVYALKRQGR	|P62805|[87_96]
KTKDDIKSTR	|Q9BX26|[813_822]
KYLDKELAGR	|Q9HD26|[208_217]
KVQTFPFLGR	|P28340|[414_423]
VQKPPLNIQR	|Q12815|[51_60]
KEHDPRVITV	|A0PJE2|[164_173]
VVKPDQLIKR	|P53396|[56_65]
RVTNPNARLR	|P62910|[121_130]
RVAEAKKIER	|Q9Y3A2|[109_118]
QANDDARTFY	|Q8IUR0|[107_116]
AYKEPLKSLR	|Q15906|[88_97]
KYVDPVISKR	|Q14244|[189_198]
FPDVPDKENF	|Q8NG31|[256_265]
TRNPHLNKDL	|P48163|[19_28]
NPDDITNEEY	|Q14568|[299_308];|P07900|[300_309]
KSKDISKTFR	|Q14651|[84_93]
HLIDDYGNTY	|Q9Y223|[49_58]
KFFPASFPNR	|Q8TCT9|[127_136]
MPNPEGRYTF	|P04626|[282_291]
RVKNVQAQNR	|Q92674|[6_15]
KTKEVPKVKR	|Q9UIF9|[662_671]
RIGVITNRER	|P62701|[191_200]
KTRDAILQLR	|Q9H1U9|[64_73]
NALNEQRVEF	|Q14980|[1036_1045]
KLNPYAKTMR	|P36578|[327_336]
KSKAPHWTNR	|O00522|[591_600]
HTRTPPIIHR	|Q9H4A3|[339_348];|Q9Y3S1|[313_322];|Q9BYP7|[265_274]
RSQKPVMVKR	|P46779|[119_128]
RFIKIDGKVR	|P22090|[68_77];|P62701|[68_77]
KVFEFGHTNR	|Q9BVG8|[624_633]
RFVPQFAKSR	|Q0VDD7|[101_110]
KTKTEQFQAR	|Q9H501|[836_845]
HAFDDQGREY	|P42892|[611_620];|O60344|[724_733]
KSKDFVQVMR	|P78527|[2416_2425]
KQYDFGKVVR	|Q9NSE4|[775_784]
NADHSMNYQY	|Q12906|[884_893]
YPYQLNDPAY	|Q9BZI1|[108_117]
RVQERQGQSR	|Q15906|[147_156]
IQRTPKIQVY	|P61769|[21_30]
HIDPNVDYQF	|Q8IUI8|[238_247]
KTFTEKHSNR	|Q96MN5|[108_117]
RYLEVEPVSR	|Q9UKR5|[126_135]
FPEFPDPHTY	|Q7Z7C8|[150_159]
EADRQKEQTF	|A1L0T0|[424_433]
RVFEHHGQVR	|Q6P1K8|[45_54];|Q13888|[45_54]
KFFLSHPAYR	|P50570|[257_266];|Q9UQ16|[257_266]
LPEEEFGHFY	|Q13045|[920_929]
RVKKEPVKER	|Q15678|[819_828]
RQDDPSYRSF	|P35222|[710_719]
KQRDDILINR	|Q8TED0|[346_355]
TVQQLEGRWR	|Q01469|[3_12]
KTKEIEQVYR	|Q8NEY8|[297_306]
SFFDKKRSER	|Q9UBT6|[566_575]
RVFVVKRQNR	|Q0VGL1|[83_92]
FPYEESKEKF	|P51858|[64_73]
RQKELESNYR	|Q13438|[639_648]
RIREIELKNR	|Q13242|[39_48]
HPFLYDRETY	|A6NHR9|[430_439]
RIYELRNKER	|P28074|[123_132]
RYQQFKDFQR	|Q13838|[329_338];|O00148|[328_337]
RTYKYFKDYR	|Q3ZCQ8|[114_123]
AAKPAASITSK	|O43670|[340_350]
GQAGNEAGRFG	|Q6UWP8|[161_171]
HAISPSAADVL	|Q9BZE9|[479_489]
NPISGLGGTKY	|Q14192|[226_236]
IVVPKAAIVAR	|Q9H3M7|[208_218]
KVKAEGPGLSR	|P21333|[874_884]
TVIPATVVTSR	|O94842|[388_398]
HAVDVDSGSVY	|O95819|[1095_1105]
ATKPAVTLARK	|Q9Y4C8|[812_822]
VPEEGGATHVY	|Q9NQ31|[107_117]
AVKSQGAITER	|Q6NUK4|[137_147]
KVKVGVNGFGR	|P04406|[3_13]
AQNVGTTHDLL	|Q13867|[27_37]
VSKPDLTAALR	|P08670|[260_270]
SVPGGELFNPR	|Q10587|[194_204]
RYLEAGAAGLR	|Q9NZL4|[155_165]
SVLDSSALKTR	|Q9BY89|[1636_1646]
SLQTEGSLSTR	|O43502|[356_366]
NEIKDSVVAGF	|P13639|[673_683]
NAEDADGKDVF	|Q96EU7|[236_246]
IVRPPESGLGR	|Q12929|[587_597]
RTLTPISGGQR	|Q13415|[334_344]
LLLPAASRPPR	|Q96DF8|[11_21]
KSKDGFLGVSR	|Q9NZV5|[172_182]
IVKPVKVSAPR	|P83731|[142_152]
RSAPGGIRETR	|Q15773|[128_138]
AGMDASFKAFR	|Q9NW82|[212_222]
ILKSPGSVVFR	|O75787|[21_31]
KTIPKGFSSSR	|Q99708|[526_536]
STFSGIKELAR	|Q8N3U4|[943_953]
KTLAGDVHIVR	|Q9UBQ0|[50_60]
VLSPTVQISNR	|Q15311|[345_355]
SVTPEGVIKQR	|Q8TEU7|[799_809];|Q9Y4G8|[656_666]
STRSVSSSSYR	|P08670|[2_12]
STKPPGTFLLR	|P40763|[599_609]
ALKGTNESLER	|P08670|[332_342]
DLDTNADKQLS	|P06702|[65_75]
AGFQRDLGSLR	|Q12772|[1009_1019]
IVGFDFDGTPR	|O14818|[133_143]
SVKVFSGKSER	|P14866|[531_541]
KTITGKTFSSR	|O15144|[290_300]
KVRGISEVLAR	|O95140|[84_94]
TSLDGNQLVQR	|Q8NBS3|[794_804]
AYVPFGAGRHR	|Q16850|[438_448]
VNKESSETPDQ	|P16070|[713_723]
MSHEDPGNVSY	|P62333|[122_132]
VMADPKGKAYR	|Q96GE9|[104_114]
HAAIPPLEEVY	|Q9HD67|[1845_1855]
ALAPPDVHHER	|Q8NEW0|[130_140]
HAQHEGESVSY	|Q15596|[308_318]
GTKQQEIVVSR	|Q15393|[24_34]
RTRTGSSFSVR	|O14734|[100_110]
RAKASELHSVR	|O43822|[11_21]
RTQNVLGEKGR	|P23396|[54_64]
KTLHGSALFQR	|Q8TCS8|[378_388]
HASPEDIKKAY	|O75190|[13_23]
KVFNQPKAKAK	|Q14008|[96_106]
ATMEVKVGRLR	|P58107|[2520_2530]
SLKGVDPKFLR	|P47914|[31_41]
KVQDKKNASSR	|Q14244|[28_38]
STLTASEIRQR	|P49588|[3_13]
KVFVKSSDLLK	|Q6AW86|[264_274];|O75467|[264_274]
AVQEFGLARFK	|Q9Y255|[142_152]
ATKQVNKAHNR	|Q86Y07|[348_358]
SPSEETDQEVF	|O14669|[21_31]
SGRPLKSLKQR	|P24928|[332_342]
RTIELPSGRSR	|O15231|[51_61]
RTVGATRLNQR	|Q14807|[232_242]
HAHPATAEYEF	|Q16082|[8_18]
KYIQKPGLLGR	|Q86WK9|[193_203]
SVKEISDIVQR	|P00519|[1120_1130]
GVNHEKYDNSL	|P04406|[134_144]
TAVKEDEINVY	|O75962|[2563_2573]
KTLDPDPAIRR	|P55060|[17_27]
STKVEALHQNR	|Q9UL40|[168_178]
LFRPVASQLPR	|P35232|[95_105]
KLLNSSKARLR	|Q15149|[740_750]
KTLLDKALTQR	|Q9UJX3|[462_472]
QVIPRTPSSFR	|P57740|[50_60]
KSKDESQSLLR	|Q9UHF7|[877_887]
RVFSVAELQSR	|Q8IUR0|[43_53]
KFKSSDPKVTR	|Q96DX7|[242_252]
KNKGKDSTEMR	|P52292|[18_28]
ATYSLANERLR	|Q9P086|[2_12]
NETTKQKLGIY	|P15924|[2265_2275]
RAKTPVTLKQR	|P42167|[205_215]
NAIAVLHEERF	|Q9Y5U9|[17_27]
DNEFGYSNRVV	|P04406|[315_325]
RSLLKSKDLLK	|P28290|[712_722]
TVKKADKVEQR	|Q99832|[142_152]
KTVDESARIQR	|Q9NZW5|[488_498]
LPVSEQQERAF	|Q9UNM6|[188_198]
KVLAKQLVHLR	|Q9UQN3|[59_69]
VVVDRKHVPEE	|Q13867|[422_432]
SVKKPHTLLQR	|P49915|[475_485]
LPDAHSDYARY	|Q96PK6|[638_648]
KYIEVTSARSR	|Q8IZW8|[149_159]
RTMPLLSLHSR	|P54368|[32_42]
KYQIFSGTSKR	|Q13287|[245_255]
TVKDLRLVTNR	|Q15020|[826_836]
KVKTPEMIIQK	|Q09666|[487_497]
KTYSVPAHQER	|P53701|[49_59]
ATSYFGKQFLR	|Q9NYZ1|[186_196]
KVKEKAKAEHR	|P20810|[594_604]
RYLDSSVRNSK	|Q9UL63|[345_355]
LPYKATENDIY	|P52597|[296_306]
ASYERLDVFAR	|Q8WUF5|[267_277]
KSLPQGHFQER	|Q9UNY4|[306_316]
KTKIIAKIQQR	|P57076|[213_223]
RGFQRDLSSLR	|P36956|[1012_1022]
RQYAKDIGFIK	|P62273|[44_54]
RVRGEPLQVER	|P09758|[245_255]
HYLPAEILQKK	|Q9BWT3|[494_504]
KQKEITKAIKR	|Q9Y3D5|[103_113]
RINELPSTMQR	|P49757|[297_307]
RTFNRGSHLTR	|Q14592|[259_269]
RVKETSNENLR	|P49454|[1871_1881]
KWKSGKDLTKR	|Q01105|[172_182]
KLKDQNIFVSR	|Q9NW13|[476_486]
RYKPDLKEGSR	|P18583|[78_88]
KYFNSYTLTGR	|Q96IX5|[17_27]
KYIHSADIIHR	|Q16539|[139_149]
RAQLEDGRFVY	|Q15562|[362_372]
KAWPRNAETQR	|Q5VYK3|[1701_1711]
HYVEAEKLRGR	|Q15475|[91_101]
HAIQENKKDLY	|Q96KF7|[68_78]
IVKKRSEDDLR	|P15924|[1624_1634]
RTVEESSRIQR	|Q14168|[524_534]
RIFPVDKSRSR	|Q9NV06|[307_317]
RTKRLVVFDAR	|P53803|[48_58]
KLKDKNTLFTR	|A6NHR9|[534_544]
RSRPEPSYHSR	|Q5PRF9|[159_169]
KVFPSHFTQQR	|Q7Z6Z7|[3345_3355]
RLLRKGNYAER	|P0C0S8|[33_43];|Q8IUE6|[33_43];|Q9BTM1|[33_43];|Q93077|[33_43];|Q96QV6|[33_43];|Q99878|[33_43];|Q16777|[33_43];|Q96KK5|[33_43];|Q6FI13|[33_43]
KYLASKKFVHR	|P08581|[1193_1203]
KYIPKQSFLTR	|Q9P0I2|[66_76]
KQYEKSENDLK	|P62333|[38_48]
KVFPEDMAKYR	|Q9BTT4|[115_125]
RVYRDDTFVGR	|Q9P206|[239_249]
TPEEDQRTYVF	|Q9H0W8|[228_238]
KFKESFAEMNR	|P13073|[85_95]
RVKFTKDHTVR	|O15164|[193_203]
RVITEEEKNFK	|P26373|[167_177]
KYVDTNLQKQR	|Q9UBU8|[103_113]
HDHVREEAQKF	|Q10981|[171_181]
VYRNPESFKEK	|Q9BW72|[28_38]
RYMDAWNTVSR	|Q9Y5L4|[72_82]
RTNQELQEINR	|P07355|[135_145];|A6NMY6|[135_145]
LPFPDETHERY	|O43292|[112_122]
RSINEKDYHSR	|P49759|[60_70]
RVLDTNDRFLR	|P11586|[532_542];|Q6UB35|[575_585]
KYLQEEVNINR	|Q9UHD8|[389_399]
KVVNPYYLRVR	|Q13131|[436_446]
RQLEEKDRVLK	|Q9NX63|[125_135]
KVKQEREDHPR	|Q8TAD8|[106_116]
RQQLRSDIQKR	|P46379|[1099_1109]
KQLQKDKQVYR	|P63092|[28_38]
RAKERQELEKR	|Q9ULW0|[667_677]
KQIEKRDKYSR	|O95926|[188_198]
RTYDREGFKKR	|Q9NZJ9|[10_20]
RYYETHNVKNR	|Q13823|[697_707]
ARYEREQYVDR	|Q9BQ04|[343_353]
AGQAGNEAGRFG	|Q6UWP8|[160_171]
GKADGAEAKPAE	|P35579|[1949_1960]
DAGAGIALNDHF	|P04406|[296_307]
GAVHDVKDVLDS	|P81605|[97_108]
KGKEGSALSHVR	|Q3MHD2|[152_163]
VSEKGTVQQADE	|P32969|[181_192]
QPDSGISSIRSF	|P04843|[269_280]
PVEEAYKRGLVG	|P15924|[2311_2322]
SSQDPRPATGRF	|P78527|[2055_2066]
LVNKESSETPDQ	|P16070|[712_723]
YLKGKIGKVPVR	|Q53RT3|[197_208]
HPDPNNENIVGY	|Q6P2Q9|[1117_1128]
KVKSAEKISTQR	|Q71F23|[150_161]
YPQDTTGNDRLP	|Q6NSI4|[795_806]
IELDGDRLTTED	|P42357|[114_125]
TAIHEALETTQY	|P12110|[899_910]
ATFSGFTKEQQR	|P14921|[51_62]
RLAPRSQYTTGR	|P33993|[396_407]
RYFDPANGKFSK	|P13639|[264_275]
KTRDEYLSLVAR	|Q96RN5|[50_61]
RVKETSNENLRL	|P49454|[1871_1882]
RVNFRGSLNTYR	|P52657|[55_66]
RYLEVEPVSRQK	|Q9UKR5|[126_137]
AAAAAVVAY	|Q04724|[405_413]
AAAATGRLL	|Q06481|[8_16]
ASFGGLASR	|P48637|[150_158]
AAKAGARKV	|Q99873|[96_104]
AVAAVAARR	|Q14697|[3_11]
ARSSVVTAV	|Q86VP6|[981_989]
GTSSVIVSR	|Q9UKB1|[53_61]
SVISGISSR	|Q8N3U4|[1058_1066]
SDSPHAVTV	|Q96DZ1|[439_447]
AGFPEARAV	|P43250|[281_289]
SPENGADSF	|P15036|[278_286]
KAPPPKAAF	|Q03111|[243_251]
SSNPALALR	|Q5T011|[378_386]
IRGGIVSQV	|P22314|[287_295]
LEKGLDGAK	|P81605|[66_74]
AGLPSHHGR	|Q92754|[112_120]
KTIGTTVGR	|P15408|[104_112]
SYGPGPSLR	|Q5JSZ5|[194_202]
ATIDSLASR	|Q9NVC6|[446_454]
EAVTPSPSF	|Q9UKG1|[396_404]
ARNGHLATV	|P57078|[726_734]
ARAPGTRTL	|Q13505|[449_457]
VDNQRGSGL	|Q9Y6W5|[278_286]
GTYGPPAKR	|O14497|[1375_1383]
GSGSHFSNR	|Q9BZF9|[382_390]
GADKNVVVF	|Q9UMS4|[241_249]
GRAPQVLVL	|Q9NR30|[258_266]
SFDSALQSV	|P49792|[261_269]
VSNGSVVHR	|Q14202|[422_430]
VISLEGKPL	|P23528|[158_166]
KSLPGVVTR	|P51553|[149_157]
SVKEVLGRA	|P23378|[445_453]
SPLGGERPF	|Q9UPQ0|[303_311]
IPDSPITAF	|Q99708|[160_168]
SSLLEKGLD	|P81605|[63_71]
KADGVPVYL	|O14548|[69_77]
FPASPPKGY	|Q16763|[70_78]
NAYTGIVLL	|Q969H6|[59_67]
ASHSPPVNR	|Q96FJ0|[239_247]
TADVVKVAY	|Q8TEM1|[929_937]
ARAPKSIEV	|Q96S55|[585_593]
AVRVLVASR	|P30042|[3_11]
AAAEITRKL	|O00567|[431_439]
GVKTVLISR	|Q9NWH9|[43_51]
TGAFEDTSF	|Q9NVP1|[171_179]
AEPEGTHSF	|Q03135|[73_81]
ARYPNGVVV	|Q96JC1|[865_873]
ADYLVPILA	|Q15041|[80_88]
VEDLESVGK	|P81605|[88_96]
GTIGKKFAR	|Q99547|[123_131]
SVYGLGRQV	|Q15417|[259_267]
VGQDSPEPR	|Q6UX71|[82_90]
ASVSSLHER	|Q12756|[415_423]
ADLERVLGL	|Q2M3G4|[707_715]
SQKAVVQAR	|Q8TEM1|[77_85]
GTKIVSVER	|O95810|[259_267]
APLLELTAY	|Q9BVI4|[468_476]
LADAINTEF	|P08670|[88_96]
SSLAPIYSR	|Q9UBY5|[177_185]
SDAPAHHLF	|Q9H0A0|[549_557]
NADDLDVAY	|Q96M69|[581_589]
NRPKALNAL	|P30084|[53_61]
RTIAPIIGR	|Q99459|[83_91]
QPEPDATEL	|Q13487|[42_50]
NANPNLSNR	|P57078|[509_517]
ADFARVAHL	|Q8WUY1|[74_82]
ASDFSDPVY	|Q8IV48|[58_66]
DANPETHAF	|Q99798|[481_489]
AFDASRTSF	|Q9Y6R0|[211_219]
HADKPVATY	|Q86UQ4|[4849_4857]
RESFPAPVV	|P30530|[610_618]
QLKGQGKSR	|P08670|[137_145]
SADPLLHSY	|O96028|[241_249]
ASKADVQKR	|P49588|[832_840]
NGDDPLLTY	|P02545|[473_481]
VDLIRGSTF	|Q9UMS5|[53_61]
SPDHSDHTL	|Q68CZ2|[379_387]
REPPPGNEL	|Q4G0M1|[42_50]
TSKPIVHAR	|A6NMS7|[1294_1302];|A6NM11|[1294_1302]
SRPDLPLLV	|Q03519|[145_153]
SSVHLVRNV	|Q32P41|[447_455]
QAAPNLRKL	|Q14692|[684_692]
YRPGSVAYV	|P53396|[652_660]
SVKKGYSSR	|Q7L4E1|[99_107]
ADHIRTLSV	|Q5JTZ9|[325_333]
SPDPSIYAY	|P27797|[300_308]
YGSFVTRAL	|O15372|[125_133]
KDVAKHLGF	|P50053|[193_201]
KVKKPTGTR	|Q9NW13|[430_438]
RVQGVSITR	|O43187|[50_58]
RTSASIILR	|P17987|[370_378]
SNSDVIRQV	|Q9Y5K5|[131_139]
VFKPKGADR	|Q12800|[237_245];|Q9NZI6|[217_225];|Q9NZI7|[234_242]
GRAEQVIFV	|Q92692|[338_346]
GSYHPGVFR	|O43374|[680_688];|C9J798|[680_688]
SDLERVTSL	|Q6NT76|[316_324]
VAFKPTSNR	|Q12929|[511_519]
NPEPNTVSY	|O00154|[217_225];|Q6ZUV0|[139_147]
WPVGGDSRF	|Q14451|[171_179]
HPHLVAEAF	|Q6IQ16|[363_371]
HAADVFEAY	|Q5T4S7|[3148_3156]
STANHIHSR	|Q96HV5|[253_261]
GTYQPLSTR	|O15213|[390_398]
GDVEKLSKF	|P61160|[332_340]
KTHAVILSR	|Q96FV2|[69_77]
KQKKPLVGK	|P36578|[391_399]
HELIHGSSF	|Q9Y223|[554_562]
VLYNGFTGR	|P30876|[1027_1035]
RVTAPKAER	|Q7Z3B3|[762_770]
KTKGPLKQK	|O95997|[76_84]
KLLASLVKR	|Q13263|[254_262]
RNKPSGITR	|Q7L590|[220_228]
KSKAITPKR	|Q9NQW6|[901_909]
AEQLRQTAL	|O95502|[130_138]
SDLKRGLKI	|Q9NZ32|[218_226]
STLPSQQNR	|P46937|[432_440]
APLQEKVVF	|Q96A54|[165_173];|Q86V24|[176_184]
SINKPTSER	|O14777|[44_52]
KTFGQKPVK	|Q12824|[8_16]
HPDVDEHSV	|O75369|[222_230]
KTLSSTKNR	|O75448|[167_175]
ATQYPVSNR	|Q9NRJ4|[741_749]
NADKLTVKF	|Q9H583|[1568_1576]
SAETESHIY	|O14569|[4_12]
TAIREAQTF	|Q9UIG0|[1154_1162]
TGKTTFVKR	|P62826|[21_29]
TADAFIVRF	|P11717|[1032_1040]
YPVPDVSTY	|P98175|[564_572]
KRPTALKKV	|Q93073|[570_578]
HPDPIVINH	|Q92925|[383_391]
KLKQKGAIR	|P06756|[531_539]
RVGPVSHHR	|P39656|[307_315]
SVIKNLQSR	|Q5UIP0|[2454_2462]
ALSPIKFNR	|Q12882|[450_458]
RTKGLTSER	|P62324|[27_35]
RVFSGVARR	|Q7Z2Z2|[510_518]
SDLKRINGF	|Q96A26|[32_40]
LPNDGDEKY	|Q9BRP1|[230_238]
ASKPYAFDR	|P33176|[42_50]
SRPHFVNTV	|Q8IXV7|[240_248]
YPNPKPEVL	|Q9BZD4|[37_45]
KEVERILGL	|Q9NXX6|[265_273]
ATRLLAEKR	|Q3KQU3|[599_607];|Q14244|[479_487]
SLQQLVSQR	|Q5QJE6|[330_338]
SELERQKGL	|Q15149|[2041_2049]
SELVRHSSF	|Q8TC12|[237_245]
YVTPVNRNV	|P62993|[209_217]
QSRTITVTR	|Q09666|[147_155]
IGKVVQVYR	|P61254|[67_75];|Q9UNX3|[67_75]
KGLSDIHHR	|Q96FZ2|[204_212]
RQAGLSYIR	|P56381|[6_14];|Q5VTU8|[6_14]
KRFSGTVRL	|P62906|[47_55]
ASKPLHVRR	|Q13506|[59_67]
AQYEDIAQK	|P04264|[356_364]
ATYGELQQR	|Q15149|[3327_3335]
RDHLIAKNV	|P08240|[346_354]
YFDVEPAQV	|Q9GZM5|[121_129]
SSNLLLHQR	|Q5EBL2|[216_224]
RTANPPKKR	|P62140|[319_327]
HAHVDKVTY	|Q6PK18|[228_236]
AELQRVQKV	|Q14764|[757_765]
VDLTRSFSF	|Q9P2T1|[30_38]
SLNNKILNR	|Q9H9A7|[437_445]
SRSVIIREL	|O95071|[201_209]
ARTDKVREV	|Q00973|[441_449]
KLYGKPIRV	|Q15427|[78_86]
AVANFIRQR	|Q96HY6|[278_286]
AEHPRLLKL	|Q01415|[14_22]
RYDPSLLDV	|P35219|[60_68]
AYKAQVNQR	|Q8IZT6|[1787_1795]
ATKPLHVRR	|Q15742|[90_98]
QSNSLFNNR	|Q6P158|[868_876]
RLKPSHTSR	|P10244|[687_695]
SFDETVTHF	|Q92547|[937_945]
KQKTDHVAR	|Q9UBD5|[697_705]
RIIEPLTSR	|P35249|[185_193]
KYFSGVTKR	|Q7Z4G4|[445_453]
KAYPKRPLL	|Q9GZR7|[381_389]
KRKEAVKKV	|P63010|[29_37]
YPDSSQSRF	|Q8WU17|[41_49]
RVNNSVQNR	|O43167|[187_195]
NRAPIYVRV	|P0DMN0|[71_79];|P0DMM9|[71_79]
TVNKDLENR	|Q6PH81|[76_84]
GSKTKHFQR	|Q8IWI9|[1093_1101]
DADVEKIHY	|Q8N3C0|[394_402]
RTLEKISSR	|Q9NWB7|[295_303]
HSHTPVEKR	|Q9NXR8|[139_147]
SSNLHIHQR	|Q9UL59|[538_546];|Q16600|[443_451]
KAKGTFRER	|Q9UHQ7|[40_48]
AAHEFTVYR	|Q969V3|[42_50]
IADLERETF	|Q69YN4|[308_316]
TDSERLLNF	|Q5T3U5|[386_394]
RYSDSLVQK	|P52701|[468_476]
IVKAKFFSR	|P46776|[123_131]
TRIPKIQQL	|P11021|[366_374]
RLTPKIQKL	|Q32NC0|[64_72]
TDSPREVFF	|Q07812|[85_93]
KARDFFTGR	|P51170|[170_178]
KVNKIVKNR	|O00139|[87_95]
RFEDSPSYV	|O60264|[167_175]
SQNSLFTFR	|Q8TEK3|[1268_1276]
QLNNIQITR	|Q969P5|[209_217]
ARLDLERKV	|P08670|[216_224]
HATEELKEF	|Q6IBS0|[8_16]
LPEEEFGHF	|Q13045|[920_928]
HPDEPLYSF	|Q9Y5Q9|[763_771]
GTVKWFNVR	|P16989|[93_101];|P67809|[61_69];|Q9Y2T7|[96_104]
HALFEISKY	|P51636|[74_82]
KTFSEILNR	|Q14204|[872_880]
AYKSILQER	|P13010|[263_271]
KVRNGHIKR	|Q9Y6A4|[28_36]
SYQEVTVQR	|Q7Z7L7|[448_456]
DAYPEIEKF	|O95997|[109_117];|Q9NZH5|[109_117]
SYAQHQQVR	|P61247|[154_162]
HSQLVIHQR	|Q14587|[344_352]
RSKGFIQKR	|Q8IZT6|[2919_2927]
RQYAEKKAK	|P29692|[180_188]
KESDGFHRF	|O00469|[47_55]
HGHNVFKER	|P49736|[210_218]
RIFAGFRTR	|Q86VH2|[615_623]
SLRLLTHQR	|Q6IBW4|[581_589]
RDLSHKEKL	|Q8WUB8|[113_121]
KPIESFNEY	|O94830|[666_674];|Q9Y6Y8|[955_963]
QPDYDLETF	|Q99661|[671_679]
VDLERTFTF	|P36959|[30_38]
RLREGQTLR	|O00165|[118_126]
SYEDRVTFL	|Q9Y624|[82_90]
TELIRQEKL	|O15020|[415_423]
HSQLIIHQR	|Q96NJ6|[461_469]
RDEIRPLSF	|Q96MI6|[82_90]
AVKRKQFEK	|Q9Y2R9|[117_125]
TDNQRILEF	|P07237|[296_304]
SQNIYIQNR	|Q99959|[627_635]
KFKFPGRQK	|Q96L21|[156_164];|P27635|[156_164]
FPQYPDKEL	|A5YKK6|[902_910]
TELERKLTF	|Q9ULG6|[432_440]
KYDATKQKR	|Q96GM5|[223_231]
KLKENHQSR	|Q9BVJ6|[466_474]
QVRKIEIVR	|P01127|[152_160]
YVDDTQFVR	|P04439|[51_59];|P01889|[51_59];|P30464|[51_59];|P30685|[51_59];|Q95365|[51_59];|P30484|[51_59];|P30492|[51_59];|P30493|[51_59];|P18465|[51_59];|Q29836|[51_59];|Q31610|[51_59];|P30499|[51_59];|Q29865|[51_59];|P30443|[51_59];|P01892|[51_59];|P13746|[51_59];|P30447|[51_59];|P18462|[51_59];|P16190|[51_59];|P30455|[51_59];|P30457|[51_59];|P01891|[51_59];|P30460|[51_59];|P30480|[51_59];|Q29940|[51_59]…
HAAVDRWQY	|P98170|[67_75]
REPLPHLHF	|Q96EB6|[466_474]
RTFVPKNER	|Q08J23|[687_695]
KSYELIRKI	|Q13572|[108_116]
KENPLQFKF	|P15311|[72_80];|P35241|[72_80]
SELLRHERI	|Q96NJ6|[378_386]
FPEIDLEKY	|P00374|[149_157]
RSNEHIREL	|P50995|[302_310]
NYVEFTRIL	|P24844|[155_163]
KEKPQQHNF	|Q9Y4P3|[69_77]
RYYTPTISR	|P49721|[145_153]
NRHGLIRKY	|P62273|[26_34]
KSKFIIHQR	|Q9NYW8|[273_281];|P17014|[281_289]
RVFLPNKQR	|P15056|[158_166];|P04049|[59_67]
TYNEHITKR	|O14578|[1928_1936]
KQRLIYQGR	|P46379|[56_64]
KRNTNLRFL	|Q8TCY9|[393_401]
VRKDHENRL	|O60524|[326_334]
NYIEFTRIL	|P19105|[154_162];|O14950|[155_163]
VYNEYISHR	|O60870|[94_102]
TRSEFYKHI	|P61160|[293_301]
YYDPKHVIF	|Q9NUQ8|[500_508]
KVRNFEVHR	|Q96T52|[65_73]
VIIEKYYTR	|P08708|[15_23]
RVYKEVKNR	|P24539|[188_196]
HYRSVYQKR	|Q96KB5|[73_81]
KYYKYILTR	|Q12873|[994_1002];|Q14839|[984_992]
SPDAADSTSF	|Q8NI37|[201_210]
ATGSIPITVR	|P49736|[756_765]
GIKPPPIIGR	|Q9NTK5|[9_18]
LEKGLDGAKK	|P81605|[66_75]
SSQQFSGIGR	|Q92841|[675_684]
LPIGDVATQY	|Q99832|[293_302]
IPPDLPMHPA	|Q9UHP3|[527_536]
GTLQPPFTAR	|Q6P9B9|[564_573]
AYKNVVGGQR	|P31947|[47_56]
HAEDPLSITF	|Q15262|[812_821]
NPDPDAETLY	|P13928|[22_31];|Q5VT79|[22_31]
FAETSEPVVY	|Q6P158|[400_409]
KTLDSVAKER	|P02545|[90_99]
LPETLDPAEY	|O95168|[14_23]
RTFSSIPVSR	|Q14204|[4159_4168]
TVEDPVTVEY	|O14818|[97_106];|Q8TAA3|[105_114]
AQYEDIAQKS	|P04264|[356_365]
SQSSHLVQHR	|Q6DD87|[104_113]
RTPGNERPPR	|P82673|[40_49]
SSKNKPHVKR	|P48436|[98_107]
ELIDQDARDL	|P07355|[189_198]
HPDEKSIITY	|Q01082|[260_269]
YALEEGIVRY	|Q9P0M9|[90_99]
SIKDIKKAYR	|Q9UBS4|[37_46]
YYVDTAVRHV	|P23396|[166_175]
KAKQGYVIYR	|P61313|[54_63]
LPFPNPERNF	|Q9NV56|[96_105]
IRNDEELNKL	|P0C0S8|[88_97];|P16104|[88_97];|Q9BTM1|[88_97];|Q93077|[88_97];|Q7L7L0|[88_97];|P04908|[88_97];|Q96QV6|[88_97];|P20671|[88_97];|Q99878|[88_97];|Q16777|[88_97];|Q96KK5|[88_97];|Q6FI13|[88_97]
KQQNPRLVYV	|O00764|[102_111]
HPAQDDRTFY	|Q12756|[1229_1238]
ATAYRPDWNR	|Q8WWX9|[24_33]
RQKFGYSVNR	|Q9Y3C1|[10_19]
RLNPKNVHQR	|Q96F86|[325_334]
SFRYNGLIHR	|P46779|[37_46]
HYYDGTIFHR	|Q13356|[314_323]
RYFYSKVQQR	|Q96GM5|[493_502]
KYFDEHYEYR	|P33552|[11_20]
ASSPGGVYATR	|P08670|[54_64]
KSKGKGVGSAR	|Q92785|[184_194]
SLGPSLATDKS	|Q9H3N1|[270_280]
RGSFDATGSGF	|Q15149|[4640_4650]
GVVPAGVILER	|Q14676|[281_291]
ENAGEDPGLAR	|P81605|[43_53]
TPEQPTAGDVF	|Q9Y5Q9|[112_122]
DAVEDLESVGK	|P81605|[86_96]
GAVHDVKDVLD	|P81605|[97_107]
ASKDATYTSAR	|P33993|[594_604]
TTLGATQLSER	|P42356|[1118_1128]
KTKEGKGPNAR	|Q14839|[261_271]
AVLGQHSHVVR	|P30291|[351_361]
VTNTRTPSSVR	|Q8IWZ3|[1949_1959]
KGKDSLYAQGR	|Q969Q0|[28_38]
RVKDASAKSDR	|Q9UNH7|[223_233]
RVAGIHKKVAR	|P26373|[82_92]
RIRTGSALVQR	|P29590|[325_335]
RLLPLAPGRLR	|P15586|[2_12]
RSKESSQVTSR	|Q9NRW7|[555_565]
NASEDEIKKAY	|Q99615|[391_401]
GTLPHYFLNGR	|Q8N9M5|[448_458]
SVKELDSKTIR	|O60216|[328_338]
TFKPVSSVKER	|Q6AHZ1|[1409_1419]
YEDIAQKSKAE	|P04264|[358_368]
RVFAAESIIKR	|O95503|[9_19]
AREGNHKPIDY	|P05089|[307_317]
RVAQKKASFLR	|P46777|[279_289]
RSFSRSKSNSR	|O75494|[170_180]
STYLRPPHTSR	|Q643R3|[484_494]
RTSTPNSRIQR	|Q7Z333|[1204_1214]
IVKPQESAHRR	|Q9UHD8|[154_164]
KLRAKQEQEAK	|P05455|[204_214]
KQISKEKLKAR	|Q6P158|[754_764]
RLKEAYSVKSR	|Q6P2Q9|[845_855]
RTRDIINVSNR	|Q8N1B3|[89_99]
RTNERLKVALR	|O75150|[365_375]
LPDDWDNRTSY	|Q9UGL1|[1315_1325]
RLLRKGNYSER	|Q7L7L0|[33_43];|P04908|[33_43];|P20671|[33_43]
RVKVYTLNEDR	|Q6IN85|[7_17];|Q5MIZ7|[7_17]
RVKYTKDHTVR	|Q13263|[183_193]
RIKETDEQRLR	|P18074|[272_282]
RTYDETYQRYR	|O14974|[760_770]
AVDPDEPVHGAP	|Q14574|[596_607]
AVKTAETGYIQR	|P24928|[851_862]
RVQSTPVTIQVI	|P32926|[364_375]
KGLEISGTFTHR	|P63010|[721_732]
RYKPLSSSAVVR	|Q96KN1|[172_183]
VNKESSETPDQF	|P16070|[713_724]
KLRDSSDSELLR	|Q96G04|[37_48];|Q8N7N1|[37_48];|P0C5J1|[37_48];|A6NEL3|[37_48];|Q9NVL1|[37_48]
RYFTTSVSRPGR	|P16190|[30_41];|P30512|[30_41];|P16189|[30_41]
KTYLGEEGKRVR	|Q9BV86|[101_112]
AAAGLRGLV	|Q9UFC0|[366_374]
AGNSPLIGR	|Q9Y4B6|[948_956]
SRAPSVATV	|O75369|[2103_2111]
SFDATGSGF	|Q15149|[4642_4650]
ATAGFTIGR	|Q93074|[447_455]
KQAGVAIGR	|Q7RTV0|[13_21]
AASAWLTAL	|A6NND4|[150_158]
TPAPPTHAL	|Q5SXM2|[1152_1160]
KVKSGAIGR	|Q9UNQ2|[3_11]
ARYGGSSNI	|Q9Y6Q9|[431_439]
ADALRPSVV	|Q92616|[2296_2304]
RTGSPLAAR	|Q9BYX4|[85_93]
NAAPPPVTY	|Q9H0D6|[833_841]
HAATDITGF	|Q99611|[312_320];|P49903|[261_269]
SPDTSVSVF	|Q8WYP5|[375_383]
QSSDADAVF	|O95071|[2587_2595]
ISAPLVKTL	|P30305|[293_301]
ATVIPSAKR	|B2RD01|[9_17]
SAYGSVKAY	|P07355|[22_30];|A6NMY6|[22_30]
FGSAVPRNV	|Q9UGU0|[713_721]
AVGGVYHPR	|O14880|[76_84]
VPATDRNAL	|P60228|[158_166]
TAALVEHAF	|Q8TBF8|[44_52]
YPDVASPTL	|Q8IVL1|[1314_1322]
QAAPDLHVL	|Q969P5|[251_259]
HPLGDIVAF	|P49327|[1351_1359]
TFDAGLQAF	|Q13813|[2020_2028]
AEATRVAFL	|Q8N4P2|[96_104]
AYKNVVGAR	|P31946|[49_57];|Q04917|[48_56];|P61981|[48_56];|P63104|[47_55]
DVDIADVAY	|P16422|[206_214]
ADLARHAQV	|Q8NAF0|[425_433]
STFSGIKEL	|Q8N3U4|[943_951]
TYDDGATKL	|Q92520|[149_157]
VAKQVLLGR	|P40429|[23_31]
AEPVPTSHF	|Q9HCH0|[1100_1108]
IFDGNVAHI	|P46939|[1656_1664]
VAETPDIKL	|P46782|[11_19]
KAANVLITR	|P50750|[151_159]
HPTVVISAY	|P49368|[118_126]
VFDTAIAHL	|O43255|[298_306]
VADGYPVRL	|Q8WX93|[1245_1253]
ATTPIFANR	|Q12802|[1885_1893]
ARFGSVNEL	|Q13129|[751_759]
GVRLPTHGR	|Q13308|[360_368]
KVIDPVAPR	|P07814|[498_506]
ARHTGIKIV	|O75533|[660_668]
VVNIALPNR	|Q71F56|[1855_1863]
RAAIPIAKR	|Q6TFL4|[485_493]
VRPAEPAFL	|Q96AT1|[10_18]
HPELNGATY	|P56545|[377_385]
RVLASKTAR	|P31350|[41_49]
STKSSIKPR	|Q7Z7G8|[115_123]
TSIDSVRQV	|Q8N3R9|[558_566]
TFDVAPSRL	|Q15155|[301_309];|P69849|[301_309];|Q5JPE7|[301_309]
ADLYRVLGV	|Q8WXX5|[14_22]
ATFLKKVAK	|Q8TAT6|[27_35]
NPNTGEVLY	|O94979|[289_297]
RPIFGGTVY	|O43663|[503_511]
RWAPIPASL	|Q08554|[135_143]
TPFVEGLSY	|Q14106|[317_325]
IVDPVSNLR	|P15924|[2301_2309]
AFDEAKADF	|P50452|[291_299]
HQDPLAVAY	|Q13131|[327_335]
KINGKVAER	|P23921|[158_166]
KRAKLISTV	|Q9Y3B9|[197_205]
LRPSTSRSL	|P08670|[44_52]
KFDPVGEIL	|Q659A1|[641_649]
RSFSLGVPR	|Q4U2R6|[22_30]
EVAAPYIEK	|P42357|[614_622]
EAINVEQAF	|P51149|[158_166]
HAATHITNR	|Q9Y5A7|[406_414]
IEKGHGIRL	|P15924|[2359_2367]
GDFIKGQNF	|O95897|[249_257]
YELGRAVAF	|O43598|[103_111]
KTKDGVREV	|P61586|[162_170]
TDLTRKEGL	|Q69YH5|[177_185]
GTRPFVISR	|P10253|[592_600]
SPIPTEDQF	|Q92539|[106_114]
KGLSVFLNR	|Q14956|[539_547]
FRIEGVKSV	|Q9UMS0|[104_112]
HPSHVQPAY	|Q99700|[1229_1237]
LYNGATRKL	|P31689|[118_126]
HPHLVAEAY	|O43791|[345_353]
KVFSGKSER	|P14866|[533_541]
SDLIRHQGI	|Q8NA42|[463_471]
SDLERGYTV	|Q9Y343|[13_21]
ALKAEHTNR	|Q8WXI9|[452_460]
KVAIKIVNR	|Q8IWQ3|[44_52];|Q8TDC3|[59_67]
FPNAIEHTL	|P22314|[637_645]
TDNPRLLSM	|Q04864|[509_517]
TTKPAIIFR	|P51610|[1974_1982]
TRSVFINNV	|Q8WYP5|[1050_1058]
RVQPPAQTR	|Q14767|[114_122]
ADNARVNFF	|O60231|[864_872]
RYDGQVAVF	|P22314|[450_458]
KANQITKVR	|Q86XR8|[411_419]
EPARPDITY	|Q9Y6H1|[91_99]
STYSGQHQR	|Q6P9B9|[157_165]
HVSKETESF	|Q6ZNG0|[104_112]
SSHLKAHQR	|O75840|[233_241];|Q99612|[214_222]
KLLQPLVPR	|Q8N8A6|[637_645]
LPSPHPVRY	|Q02224|[2652_2660]
IADKPMTQY	|O75940|[216_224]
SSNLIIHQR	|Q96JF6|[139_147]
HDVDDPHSF	|Q13123|[18_26]
VYDLSIRGF	|Q15631|[209_217]
QYDEAVAQF	|P49321|[599_607]
GRQDQIQQV	|P52292|[365_373]
ARYGHELLI	|Q8N8A2|[347_355];|O15084|[347_355];|Q8NB46|[347_355]
TVKLTIQNR	|P30050|[59_67]
LPDPNVQKY	|P57071|[1046_1054]
FHYPGVQNL	|O94967|[348_356]
QAYPEVRIV	|Q08211|[532_540]
KRISKTTKL	|Q562F6|[23_31]
HTLEPLIPR	|Q13418|[309_317]
KRATLDEED	|P42892|[22_30]
REDVGKVKF	|Q14166|[461_469]
VYDLLKTNL	|Q99460|[493_501]
HRIGQQNEV	|P51532|[1191_1199];|P51531|[1161_1169]
VLKQVIKPR	|Q86YP4|[497_505]
QDLEHVEVL	|Q13813|[179_187]
RSVSHLRKV	|P08758|[201_209]
NRYHVPVVV	|P04844|[265_273]
KTLPWGPKR	|Q00341|[1260_1268]
RENNAVYAF	|O75368|[86_94]
GTLTFFKNR	|Q6PJ21|[229_237]
ETPKIVRKL	|Q9UPP1|[241_249]
HEPEPHILL	|P33552|[60_68];|P61024|[60_68]
SRPHVVKVY	|Q14451|[99_107]
HPESERISM	|Q01082|[1663_1671]
HLPSHIRIL	|Q9Y606|[173_181]
KFIDTTSKF	|P39023|[366_374];|Q92901|[366_374]
RVMKALVNR	|Q08945|[316_324]
NVADLHEKY	|P28074|[250_258]
KELERLTSL	|Q8TBM8|[367_375]
KGNVFKNKR	|P84098|[128_136]
RDSSPKVRF	|Q9H583|[2074_2082]
KYIDVVINK	|O75525|[44_52]
VRPDNTYEV	|P27797|[176_184]
HRPELVTKL	|Q14CX7|[93_101]
IFDVHVHEV	|O15031|[1699_1707]
RQKPSVHSR	|Q96MU7|[59_67]
RESPRPLQL	|Q6PKG0|[73_81]
SSQLIKHQR	|Q969W8|[323_331]
RRAAQVQRL	|Q969G5|[101_109]
RTKAPKIQR	|P62753|[170_178]
FRPPITQEI	|Q9Y4A5|[143_151]
RDFLKAQQV	|Q9Y2J8|[448_456]
RGKEGYIER	|Q9UEE9|[266_274]
KSQLVIHQR	|Q9Y6Q3|[585_593];|Q86T29|[181_189]
YRTDMIQAL	|Q6P2Q9|[1470_1478]
VKYNDPIYV	|Q10567|[326_334];|P63010|[326_334]
SYSPLLREF	|O15230|[245_253]
RALDDVRNR	|Q14258|[218_226]
SVLDYFSER	|O75586|[28_36]
KSLIKSWKK	|Q15560|[70_78];|P23193|[67_75]
TRPVYLKKL	|Q9Y2U8|[35_43]
LPTEQEVRF	|Q8IWF2|[539_547]
IRYIDNQVV	|Q9H467|[245_253]
AQFVREITR	|Q14202|[1116_1124]
IRADIDKKY	|P11279|[145_153]
SQFEKTRKV	|Q9NW08|[457_465]
RVKEVVKKH	|Q58FF7|[176_184];|P08238|[197_205]
HWDPQEVTL	|Q9HBU6|[132_140]
RFLAVRTLR	|Q8N7N1|[19_27];|P0C5J1|[19_27]
ADLIRHVYF	|Q9BQA5|[80_88]
EAIRELNEY	|Q15006|[139_147]
TPEEDQRTY	|Q9H0W8|[228_236]
VQKPSYYVR	|Q99541|[211_219]
RTKNLQKVR	|P51587|[316_324]
SSNLFRHQR	|P17028|[347_355]
RELERQNTV	|O43295|[976_984]
RQKPPIIHR	|O14976|[164_172]
NRPEFITEF	|Q8WXH0|[5666_5674]
RGVDFFKQR	|Q96S55|[655_663]
YDLLRNTNF	|Q13627|[246_254]
EELERHAQF	|P42356|[962_970]
SYFSFSRNR	|Q9UBZ4|[68_76]
PFLDIQKRF	|O43920|[2_10]
KRYKEAQKI	|O43242|[179_187]
IRHNKDRKV	|Q07020|[5_13]
RLWGIQKNR	|P43268|[379_387]
KLKEKQIQR	|Q9Y5A7|[180_188]
RDFQHVEKL	|Q9UGK3|[55_63]
RTRVPNKFR	|Q9Y2K7|[317_325]
HYSEELRQL	|Q8TDX7|[262_270]
KQKTDVHYR	|O75923|[1851_1859];|Q9NZM1|[1828_1836]
KIRKTFVQR	|Q5TA45|[289_297]
FPHPHIHEY	|Q5W0V3|[667_675];|Q86V87|[635_643]
NSREKIYNR	|Q9BWT1|[256_264]
RYIEIFPSR	|Q12849|[317_325]
KIWHKQGQR	|Q03468|[849_857]
LRPVFQQRF	|Q8WW35|[31_39]
KKINWIVQY	|Q9NYK6|[92_100]
KVWNKIQKR	|Q7Z7G8|[1235_1243]
RIHRHLKSR	|P0C0S5|[32_40]
RTYYSPVYR	|Q99569|[418_426]
KSRDPFWNR	|O75694|[1308_1316]
RVQYRQISR	|P24386|[446_454]
KTKEGYYYR	|P08243|[511_519]
RVKELQRQR	|Q6NSJ2|[118_126]
QTYEKFLHR	|O94832|[630_638]
LYWSHPRKF	|P62273|[6_14]
RYNPYLKRR	|O60934|[745_753]
RTFRKFTYR	|P62841|[10_18]
SSRASGLVGR	|Q9UH99|[112_121]
KLAPGGHVGR	|P36578|[239_248]
ARFGPGGQLI	|O15027|[1274_1283]
VPAPDGQFAF	|Q14469|[222_231]
SVGQDSPEPR	|Q6UX71|[81_90]
SADPYAITVF	|Q14517|[3126_3135]
RTKKVGIVGK	|P61513|[4_13]
AAFDGHAREL	|Q3MIP1|[482_491]
FTTSVSRPGR	|P16190|[32_41];|P30512|[32_41];|P16189|[32_41]
AGHINPLIIY	|Q9ULI1|[406_415]
RTYSLGSALR	|P08670|[36_45]
DLDTNADKQL	|P06702|[65_74]
VPDPSPDHLY	|Q8N4X5|[404_413]
APIRPDIVNF	|P36578|[30_39]
RVAPSLKSQR	|P49257|[81_90]
KQKSPDGVHR	|Q9UMN6|[1161_1170]
AQLEKRSIGR	|O15066|[367_376]
FPQKIAGELY	|Q9GZM5|[145_154]
ITEEIYKTGL	|P05089|[260_269]
RQAFLSGRSR	|P51648|[9_18]
STYYGSFVTR	|O15372|[122_131]
SYDPTIENTF	|Q15382|[34_43]
RTSEGVLRNR	|Q8N3S3|[352_361]
VLNEGMPIYR	|P31689|[303_312]
NPDDITQEEY	|P08238|[292_301]
TYDDRAYSSF	|Q15056|[6_15]
KVVNPLFEKR	|P62424|[26_35]
DFFNYAGLQR	|P08236|[207_216]
FFDPNTHENL	|P58107|[767_776];|Q15149|[2990_2999]
HYVPKIYCRG	|Q8IWV8|[44_53]
YAQDEHLITF	|O75643|[1245_1254]
RAQEESLKHR	|Q9BT92|[396_405]
RVRSLETENR	|P05783|[97_106]
RYKEKVAELR	|O95251|[259_268]
HPDTSYYIRY	|Q9BSK4|[386_395];|Q96JP0|[334_343]
RLQNEHRVLR	|Q14129|[84_93];|Q9BY27|[84_93]
RYIEIFPSRR	|Q12849|[317_326]
DAGAGIALNDH	|P04406|[296_306]
SADVAADIAKY	|Q9ULU4|[919_929]
PVDIVPDSTKA	|A8K2U0|[934_944]
GTKLPNSVLGR	|Q9NZN4|[478_488]
ATAPVVTFSPR	|P32519|[530_540]
RVLPPSALQSV	|Q96GD4|[333_343]
SAQSRGYGAQR	|Q5BJH7|[44_54]
LADDSSSRDSF	|Q7LBC6|[547_557]
SVAERDLGVTR	|Q15149|[361_371]
RTQHGGSHVSR	|Q9Y3D9|[139_149]
RIKQSASGTKR	|P17858|[554_564];|Q01813|[565_575]
KTLDKAGVLHR	|Q6ZUM4|[495_505]
RARPSLTVTPR	|Q8TF76|[104_114]
SLKHSTTLTNR	|O14593|[66_76]
IYLPPEASSQR	|Q6P0N0|[11_21]
AIYPFLDSPNK	|Q6W2J9|[202_212]
RILDPTKLGPR	|Q13308|[630_640]
RVLEKLGVTVR	|P61160|[384_394]
RLLASKSLLNR	|P43308|[22_32]
RAVARTAQNER	|Q9BW19|[524_534]
KPFNPLLGETY	|Q9BXW6|[623_633];|Q9H1P3|[150_160]
AVREVLHGNQR	|P62906|[13_23]
YPSRVFVGDTF	|Q9H3H5|[244_254]
SSKNRKAIVER	|P62910|[104_114]
RTYSPSAQVKR	|Q13671|[504_514]
QALPSQAFIYR	|Q96EK7|[613_623]
VFDRPLPVSRL	|P25786|[98_108]
IYQPSVILNPR	|Q6NXG1|[572_582]
RLVPSDKFSPR	|Q5SW79|[1190_1200]
VVDRKHVPEEV	|Q13867|[423_433]
HPEPTERVVVF	|Q9NZI5|[176_186]
RVKETEKALSR	|Q9UPN4|[604_614]
RVKTPTSQSYR	|Q9Y2X9|[885_895]
RLNELPSTLQR	|Q9Y6R0|[326_336]
RLRDGQLVSQR	|Q96KS0|[218_228]
RLLQTGQERAR	|Q9HD33|[154_164]
RARIVAEEFLK	|P59998|[156_166]
KTAPFNKEKER	|Q07617|[743_753]
HVRDADLLKKR	|Q8N3D4|[1276_1286]
KFIQEKKLIGR	|P62495|[279_289]
KVINNPSYRQR	|Q16880|[415_425]
KFKSIEEVIKR	|P47895|[421_431]
RYIKNPRIVLL	|P49368|[231_241]
RYLNEKAVSYR	|Q13492|[129_139]
RYKEGRVILER	|P62699|[93_103]
RSNEHIRELNR	|P50995|[302_312]
RYYDSKNHQKR	|O00471|[367_377]
RYQQFKDFQRR	|Q13838|[329_339];|O00148|[328_338]
HPAAAGRDAVVF	|Q86X29|[63_74]
SISGPGVDKEPF	|Q08554|[171_182]
LDPEISSGEGLR	|Q08554|[496_507]
KAKPAPSKTQAR	|O95433|[187_198]
RVLQPGTALFSR	|P47224|[29_40]
RVLSGHLLGRPR	|O00116|[39_50]
IKGNFHAVYRDD	|P05109|[22_33]
RYKPTGEYVTVR	|Q7RTN6|[89_100]

## Sheet: HCC1143 spliced
sequence	annotation
SSGPGPSRL	|Q9C0B2|[433_434_422_428];|Q9C0B2|[444_445_422_428]
NGGVKAVNL	|Q9BSH4|[171_174_199_203]
PPELAAGAF	|Q14162|[566_568_559_564]
DFTGTGSGF	|Q9NS15|[134_137_104_108]
VAAAESLHP	|O14792|[80_84_75_78]
AGVGPTERL	|P19235|[70_74_54_57]
SRPPPGMGI	|Q8NFD5|[841_844_859_863]
KLDALQGGI	|Q96MW1|[56_62_46_47];|Q96MW1|[56_62_62_63]
SPDGSDPKI	|Q8TAF3|[452_459_431_431];|Q2M3C7|[455_460_448_450]
AGFPEALRG	|Q8N895|[74_75_44_50]
EPAVVAAYV	|P29372|[253_259_278_279]
SSSGPERSL	|Q9Y613|[129_134_137_139]
AEAVRILGV	|Q9Y223|[458_461_466_470]
KVIIQKAAG	|Q6PJI9|[646_650_642_645]
SSNPALARL	|Q5T011|[378_384_368_369];|Q5T011|[378_384_406_407]
ATLGALQVR	|Q9H254|[837_840_851_855]
GQAPPPVTY	|P29322|[587_593_615_616];|Q9H0D6|[852_854_836_841];|Q9H0D6|[852_853_835_841]
TSTVPRLGV	|Q9NPH2|[44_46_56_61]
SDLGRAAQL	|Q9P2E9|[1361_1367_1348_1349];|Q9P2E9|[1361_1367_1380_1381]
TSSPVRALT	|O14827|[736_742_747_748];|O14827|[736_742_760_761];|O95486|[228_230_220_225]
IADADATVY	|P24043|[2092_2099_2069_2069]
KQIGGTHVV	|P00488|[468_472_450_453];|P00488|[468_471_449_453]
VGLTVHGTR	|O43320|[101_103_80_85]
ADLIRGANL	|P60866|[37_43_47_48]
ARAPGTRTI	|Q13505|[449_456_440_440];|Q13505|[449_456_443_443]
RVAALVASR	|Q96G91|[245_252_230_230];|Q96G91|[245_252_234_234];|Q96G91|[245_252_245_245];|Q96G91|[245_252_268_268];|Q96G91|[245_252_275_275];|Q96G91|[245_252_276_276];|Q96G91|[245_252_277_277]
PEAHGHISV	|Q7Z6L1|[1157_1161_1133_1136]
PAQESAVTF	|Q14592|[8_12_19_22]
FPGCPVAYP	|Q9BZW4|[289_292_261_265]
VSKEVALGR	|Q6ULP2|[299_300_277_283]
ADAIRTSNI	|P50991|[45_51_37_38];|P50991|[45_50_36_38]
ADKKAKGRS	|O15055|[124_130_143_144]
FAAKLGREA	|Q9ULC5|[596_601_616_618]
QAAPDLHVI	|Q969P5|[251_258_236_236];|Q969P5|[251_258_279_279];|Q969P5|[251_258_284_284]
SVPGDMLSY	|A6NKD2|[154_157_179_183];|P0CW00|[154_157_179_183];|P0CV99|[160_163_185_189];|Q01534|[154_157_179_183];|P0CV98|[154_157_179_183];|P0CW01|[160_163_185_189]
AQRLIANAI	|Q6ZW33|[246_247_271_277];|Q6ZW33|[257_258_271_277]
EPDSPLPAF	|P30291|[57_63_54_55]
SEQLRGLGL	|Q8TDX6|[90_94_105_108]
GVKTVIISR	|Q8NEC7|[327_330_299_303]
SPQEDGVEI	|P11388|[1247_1254_1223_1223];|P11388|[1247_1254_1225_1225];|P11388|[1247_1254_1239_1239]
ALKSTKGLR	|Q86YF9|[530_533_538_542]
TAFPATVNR	|P15863|[329_334_326_328]
VDRKVFVGG	|Q7Z5Q1|[360_361_332_338];|Q17RY0|[500_501_472_478];|Q8NE35|[469_470_441_447]
PADGETFVF	|Q9P225|[2303_2307_2316_2319]
KDSFHGVGH	|Q6PCE3|[292_293_264_270]
TGSPPHLQF	|Q8N4S7|[27_28_15_21]
AALAKGWLR	|Q8NAC3|[551_553_564_569];|Q8NAC3|[585_587_564_569]
KAANVLTRL	|P0C7M7|[100_106_116_117]
GIDGYLVRP	|Q14324|[767_773_758_759]
KLGGNVKKF	|Q9Y281|[152_157_126_128]
VSYVRALPS	|P78325|[57_60_44_48];|Q7Z5J1|[140_143_148_152]
HADPHNSAF	|O00767|[167_173_145_146]
YFTKPGVPS	|Q15517|[323_326_334_338]
LSKANPVNR	|Q9Y217|[207_208_226_232];|Q9Y217|[207_207_225_232];|Q9Y217|[215_215_225_232];|Q9Y217|[220_220_225_232];|Q9Y217|[221_221_225_232];|Q9Y217|[243_243_225_232]
GQNPNLSNR	|P57078|[497_498_511_517]
ATWAVRTPV	|Q5SV97|[741_747_722_723]
GVRTITVTR	|Q09666|[138_139_149_155]
KASSLTIRE	|Q5VST9|[652_655_668_672]
AEAIRKLGF	|Q6QHF9|[447_452_427_429]
TFDVARISP	|P24928|[1184_1184_1202_1209];|P24928|[1222_1222_1202_1209];|P24928|[1227_1227_1202_1209]
LAAREVLAY	|P49736|[237_241_243_246]
EPPAPFVSY	|Q2KHR3|[1530_1536_1551_1552]
RFDQTLGGL	|Q9H3S4|[131_134_124_128]
AYSRLTVSL	|Q5NUL3|[262_264_256_261]
PATQDYIGF	|Q15257|[18_21_47_51]
HDSRIFGAL	|A6NDP7|[184_187_178_182]
ASKPTVQRE	|Q9BX70|[98_104_90_91];|Q9BX70|[98_103_89_91]
FSRSASLSY	|Q6P4Q7|[636_637_661_667];|Q6P4Q7|[636_636_660_667];|Q6P4Q7|[686_686_660_667]
DRSDGHVSF	|Q9BUY7|[140_141_143_149]
FRVKTRGGV	|O43699|[368_373_345_347]
AAYQSVRII	|Q9HAT2|[147_154_136_136];|Q9HAT2|[147_154_154_154];|Q9HAT2|[147_154_160_160]
NIFGSVRTK	|P23467|[1331_1331_1347_1354];|P23467|[1360_1360_1347_1354];|P23467|[1367_1367_1347_1354]
NLFGSVRTK	|P23467|[1360_1361_1348_1354]
GTYQPKMVV	|Q8TC59|[874_875_843_849]
RVILPTVAR	|Q8NFA2|[140_145_114_116]
PHCTDKDPI	|Q9HBM0|[517_520_533_537]
FSISFANSR	|Q9Y284|[44_45_66_72]
LRNGSERVV	|Q14677|[108_109_92_98];|Q14677|[69_69_91_98];|Q14677|[83_83_91_98];|Q14677|[84_84_91_98];|Q14677|[85_85_91_98];|Q14677|[86_86_91_98];|Q14677|[89_89_91_98];|Q14677|[108_108_91_98];|Q14677|[111_111_91_98]
SLNKPTSER	|O14777|[55_56_46_52]
RDNPHSHGI	|P55268|[100_106_129_130]
IAKSIHHAR	|P46781|[97_97_120_127];|P46781|[102_102_120_127];|P46781|[123_123_120_127];|P46781|[130_130_120_127];|P46781|[135_135_120_127];|P46781|[144_144_120_127];|P46781|[148_148_120_127]
AFKPLSLRT	|Q14690|[410_413_433_437]
RTGPPRPPR	|Q96P48|[161_166_159_161];|Q96P48|[161_166_164_166];|Q9H1U4|[79_84_82_84];|Q76KP1|[578_580_568_573]
LSTPVIRTF	|Q9NZB2|[972_972_990_997]
YGYNGFTGR	|P30876|[1018_1020_1030_1035];|P30876|[1018_1019_1029_1035]
TSYVPIAQR	|Q5T481|[484_489_511_513]
LYNGATRKI	|P31689|[118_125_133_133]
VYSSALKLR	|Q7L2K0|[357_360_369_373]
TGVEILNHR	|Q9H1P3|[262_263_255_261]
KVEIHVKSV	|Q68DA7|[1160_1163_1173_1177]
GRTLMAVHR	|Q3B7T1|[151_154_145_149]
SELIRNVTI	|Q15029|[126_133_129_129];|Q15029|[126_133_150_150];|Q15029|[126_133_157_157]
SEEERQVGI	|Q14137|[519_526_531_531]
IYKAVPSRL	|P41252|[408_414_386_387]
HAIEESKAY	|O15372|[142_147_165_167]
ALYGDKPRK	|Q96P16|[128_133_135_137];|Q96P16|[128_132_134_137]
IYDPVISKL	|Q96EZ8|[184_184_180_187];|Q96EZ8|[200_200_180_187];|Q96EZ8|[203_203_180_187]
KELAGRKVF	|Q9H116|[209_210_226_232]
DSIVRSWSV	|Q8IX04|[399_402_386_390]
SVQGLLIRY	|Q6PIF6|[63_66_85_89]
VRPPIVKQI	|Q9P270|[220_227_224_224];|Q9P270|[220_227_229_229];|Q9P270|[220_227_252_252]
KRPNAILKI	|P49137|[197_204_174_174];|P49137|[197_204_180_180];|P49137|[197_204_182_182];|P49137|[197_204_202_202]
HAIEDKETL	|Q15424|[181_188_156_156];|Q15424|[181_188_160_160];|Q15424|[181_188_166_166];|Q15424|[181_188_174_174];|Q15424|[181_188_178_178];|Q15424|[181_188_192_192];|Q15424|[181_188_202_202];|Q15424|[181_188_210_210]
KEVERILGI	|Q9NXX6|[265_272_242_242];|Q9NXX6|[265_272_270_270]
HESANILLY	|Q5TG30|[554_554_579_586];|Q5TG30|[574_574_579_586];|Q5TG30|[575_575_579_586];|Q5TG30|[595_595_579_586];|Q5TG30|[612_612_579_586]
KSKPGQFLR	|O14745|[172_178_150_151];|O14745|[172_178_193_194]
SSKPVMRKE	|Q9HCC6|[37_42_66_68]
TADPLDYRI	|P52948|[1516_1523_1515_1515]
ATFKDIRTI	|Q7Z3Z2|[151_154_165_169]
STPDHIREL	|Q99707|[326_333_308_308];|Q99707|[326_333_316_316];|Q99707|[326_333_356_356];|Q99707|[326_333_357_357]
KELLRVAQL	|P48047|[60_67_45_45];|P48047|[60_67_55_55];|P48047|[60_67_62_62];|P48047|[60_67_63_63];|P48047|[60_67_69_69];|P48047|[60_67_79_79];|P48047|[60_67_92_92]
NRPKFLNAI	|Q6NVY1|[52_59_49_49];|Q6NVY1|[52_59_65_65];|Q6NVY1|[52_59_68_68];|Q6NVY1|[52_59_84_84];|Q6NVY1|[52_59_85_85]
VTKLQNSRE	|O60356|[67_73_48_49]
KDHSKLLSF	|Q9NRY4|[1007_1012_1022_1024]
RYRPGTVAR	|P84243|[41_48_18_18];|P84243|[41_48_27_27];|P84243|[41_48_41_41];|P84243|[41_48_43_43];|P84243|[41_48_50_50];|P84243|[41_48_53_53];|P84243|[41_48_54_54];|P84243|[41_48_64_64];|P84243|[41_48_70_70];|P84243|[41_48_73_73];|Q6NXT2|[40_47_18_18];|Q6NXT2|[40_47_27_27];|Q6NXT2|[40_47_40_40];|Q6NXT2|[40_47_42_42];|Q6NXT2|[40_47_49_49];|Q6NXT2|[40_47_52_52];|Q6NXT2|[40_47_53_53];|Q6NXT2|[40_47_63_63];|Q6…
HTIERIPPL	|Q96JB1|[478_483_505_507]
KLKDLAFKL	|O14777|[253_257_262_265];|Q96EB1|[372_374_368_373];|Q96EB1|[372_373_367_373];|Q96EB1|[376_377_367_373]
FSAREPQEI	|O60308|[19_23_43_46]
GEHTLPFLY	|A8MZF0|[275_278_285_289]
KDNERVVGY	|Q16881|[580_587_555_555];|Q16881|[580_587_572_572]
LYNSFKRGV	|Q16719|[440_444_420_423]
VYKPVKHGR	|P62841|[105_105_123_130];|P62841|[126_126_123_130]
RSPHVVKVY	|Q14451|[114_115_101_107]
KLNEILQRA	|Q99613|[332_338_347_348];|B5ME19|[333_339_348_349]
YDKDEVGLF	|P35442|[767_773_759_760]
IPVSDRHVY	|Q86UP3|[1325_1326_1344_1350];|Q15911|[1413_1413_1392_1399];|Q15911|[1425_1425_1392_1399]
ATQQNQQRL	|Q08379|[678_684_674_675]
LNKEEGQIR	|Q53GS7|[216_217_238_244]
SRFPEALRI	|Q13200|[260_267_281_281]
KINVVPHQR	|Q9H9G7|[567_570_580_584];|Q9UL18|[564_567_577_581]
ERFFSDKVA	|Q9BRR6|[130_136_145_146]
TYDVQVTKF	|Q9UHF7|[305_311_336_337]
TAVRDYDVY	|P49585|[226_227_210_216];|Q9Y5K3|[226_227_210_216]
NAKPNYIKR	|P55735|[154_155_175_181]
GTVKWFVRN	|P16989|[93_98_100_102];|P67809|[61_66_68_70];|Q9Y2T7|[96_101_103_105]
TSQINYLNR	|Q8N8Q9|[245_246_232_238];|Q8N8Q9|[258_259_232_238]
KVIKEIREV	|Q86UT8|[146_150_155_158]
LRNSQTRKI	|Q3LFD5|[243_243_262_269];|Q3LFD5|[245_245_262_269];|Q3LFD5|[248_248_262_269];|Q3LFD5|[252_252_262_269];|Q3LFD5|[256_256_262_269];|Q3LFD5|[273_273_262_269];|Q3LFD5|[279_279_262_269];|Q3LFD5|[285_285_262_269];|Q9UMW8|[243_243_262_269];|Q9UMW8|[245_245_262_269];|Q9UMW8|[248_248_262_269];|Q9UMW8|[252_252_262_269];|Q9UMW8|[256_256_262_269];|Q9UMW8|[273_273_262_269];|Q9UMW8|[279_279_262_269];|Q9UMW8|[…
IADHPDFFR	|Q9C0C9|[645_651_651_652];|Q9C0C9|[645_651_653_654]
RDSLREQTI	|Q6DN90|[492_499_473_473];|Q6DN90|[492_499_483_483];|Q6DN90|[492_499_523_523];|Q6DN90|[492_498_482_483]
VYLDRVRSL	|P05783|[98_98_94_101];|P05783|[123_123_94_101]
KDNEHKRIS	|Q9BXS6|[289_295_275_276]
RIREGQTLR	|O00165|[139_140_120_126]
KEQQRQFGI	|Q494R4|[189_196_173_173]
KKFFPKRGQ	|P62942|[35_37_16_21]
GVTRYIYNR	|P01920|[52_52_59_66];|P01920|[86_86_59_66]
RSNEHIREI	|P50995|[302_309_278_278];|P50995|[302_309_281_281];|P50995|[302_309_285_285];|P50995|[302_309_296_296];|P50995|[302_309_298_298];|P50995|[302_309_307_307];|P50995|[302_309_326_326];|P50995|[302_308_280_281];|P50995|[302_308_297_298]
LRNQILREL	|Q96D53|[342_346_355_358];|Q6ZVS7|[20_21_17_23];|Q6ZVS7|[28_29_17_23];|Q6ZVS7|[42_43_17_23];|A6NL82|[20_21_17_23];|A6NL82|[28_29_17_23];|A6NL82|[42_43_17_23]
YDHKRISKI	|Q9Y697|[317_324_322_322];|Q9Y697|[317_324_330_330];|Q9Y697|[317_324_333_333]
SSYLRLHER	|P16415|[233_237_209_212]
YFDEPVEIR	|Q9Y2H9|[674_676_697_702]
ARYPKKLHY	|Q9Y6J0|[1242_1247_1228_1230]
KEQERIFQI	|Q9NVK5|[199_206_179_179];|Q9NVK5|[199_206_190_190];|Q9NVK5|[199_206_192_192];|Q9NVK5|[199_206_204_204];|Q9NVK5|[199_206_217_217];|Q9NVK5|[199_206_220_220];|Q9NVK5|[199_205_178_179];|Q9NVK5|[199_205_219_220];|O75116|[1240_1243_1226_1230]
YFVHPTYKR	|Q9NXN4|[425_430_417_419]
RELQHYHQL	|P56192|[680_680_688_695];|P56192|[700_700_688_695];|P56192|[702_702_688_695];|P56192|[706_706_688_695];|P56192|[713_713_688_695]
TKNVSKPVG	|Q9Y3U8|[18_24_9_10]
TYYGSFRSL	|O15372|[123_128_105_107];|Q8TCT6|[5_6_30_36]
FGGGGGAVG	|Q8WXS5|[336_338_329_334];|Q8WXS5|[336_337_328_334];|Q8WXS5|[336_336_327_334]
ASLTGAVGF	|Q6NUQ4|[509_513_493_496]
TAAAAGVFF	|P15976|[54_58_31_34]
TSVSPAPGR	|Q6WN34|[342_346_334_337];|Q99490|[80_81_104_110]
ASATAVLRS	|Q8WXF8|[218_219_235_241]
GEDASVAVF	|Q9NSK0|[532_539_529_529]
AGVGPTREL	|Q9UI10|[93_94_71_77]
AESLVRGGL	|Q9NPB6|[203_205_197_202]
VDASSVSFV	|Q8IZV2|[125_131_116_117]
QAQGTSVAY	|Q8NCN5|[42_44_54_59]
ADLAHITAL	|Q9H211|[527_534_501_501];|Q9H211|[527_534_502_502];|Q9H211|[527_534_505_505];|Q9H211|[527_534_506_506];|Q9H211|[527_534_510_510];|Q9H211|[527_534_512_512];|Q9H211|[527_534_523_523];|Q9H211|[527_534_529_529];|Q9H211|[527_534_536_536]
KRSPVAGGR	|P49815|[1043_1047_1053_1056]
ATLGALNLR	|Q8NFU7|[337_341_309_312]
ADSPNVVDL	|Q7L0Y3|[292_297_279_281]
PTGEVAPVY	|Q96C23|[210_217_201_201]
ALFGANQGR	|Q8WXG9|[2047_2053_2037_2038];|Q8WXG9|[2047_2052_2036_2038]
SHFGSAISE	|O14709|[383_384_353_359]
PSDTSVSVF	|Q8WYP5|[395_396_377_383]
VGLTGSRHL	|O95848|[146_152_130_131]
LSAPVITLK	|Q9GZY0|[361_366_387_389];|Q9H1B4|[250_255_276_278]
PILDPGLGY	|Q6ZSY5|[216_223_198_198]
AATDIARLN	|P49903|[262_266_245_248]
SLDDLANAK	|Q96RL7|[231_235_258_261]
TPEPSVHLA	|Q9NYJ7|[532_538_529_530]
EQGTVLAFS	|Q6JQN1|[952_958_928_929]
ASSPVFTSR	|P08729|[15_15_6_13];|P08729|[16_16_6_13];|P08729|[22_22_6_13];|P08729|[29_29_6_13]
HSNPPRSPA	|A6NL88|[451_453_431_436]
SSYGNIRVA	|Q8N122|[721_727_729_730];|Q8N122|[721_727_752_753]
SFDSGSVRI	|O14896|[413_420_390_390];|O14896|[413_420_395_395];|O14896|[413_420_402_402];|O14896|[413_420_423_423];|O14896|[413_420_428_428];|O14896|[413_420_432_432];|O14896|[413_420_442_442];|O14896|[413_419_441_442]
SVQGSHRSL	|Q9UMZ2|[1065_1070_1072_1074]
KVSMPIKAP	|Q09666|[1780_1784_1776_1779]
LYDAVLPAL	|Q8IW45|[213_218_192_194]
ASAQKFSRS	|Q7Z628|[133_139_130_131];|Q7Z628|[133_139_141_142];|Q7Z628|[133_139_151_152];|Q7Z628|[133_138_140_142]
GSLGHLQRN	|P33981|[217_223_225_226]
VFIEAAARI	|Q9Y2G3|[544_546_536_541]
ARHMLAQAV	|Q9Y4K3|[259_261_272_277]
VFLEAKPVP	|Q9UGP8|[696_698_718_723]
ADILRGKNL	|Q9NR99|[784_787_791_795]
VGSRKVEVK	|P47898|[231_235_246_249]
SNFKDGATY	|Q8WXG9|[4846_4848_4824_4829]
APAELLPEY	|A8MVX0|[597_603_617_618]
ARLSKTNTL	|O94876|[474_476_447_452]
KASSITRLE	|P30622|[817_823_797_798];|P30622|[817_823_807_808];|P30622|[817_823_849_850]
PNTNEGVLY	|Q08554|[409_416_392_392];|Q08554|[409_416_424_424]
SPDHDHTLS	|Q68CZ2|[379_382_384_388]
KTTFISVRG	|A6NHR9|[1207_1210_1217_1221]
SALSHVRKL	|Q3MHD2|[157_164_159_159];|Q3MHD2|[157_164_179_179]
KHSDTKKAP	|Q7Z6J0|[291_297_289_290]
PFVETGISY	|Q12879|[527_534_502_502];|Q14957|[525_532_499_499];|Q14957|[525_532_500_500];|Q14957|[525_532_551_551];|O15399|[555_562_530_530];|O15399|[555_562_581_581]
NSPEDSQPF	|Q6ZMW2|[79_86_58_58];|Q6ZMW2|[79_86_75_75];|Q6ZMW2|[79_86_106_106]
KVYTGSPRL	|Q2KJY2|[1090_1093_1064_1068]
WKGTPPQAH	|Q9C000|[269_270_239_245]
SGKTTFNRI	|Q96RR1|[419_424_399_401]
ATKGHLDQR	|Q9UIW2|[1685_1688_1662_1666]
HAANPENQF	|Q5JWF2|[792_793_763_769];|P63092|[149_150_120_126]
SSLDKVHRS	|O94964|[1183_1189_1158_1159];|O94964|[1183_1189_1169_1170];|O94964|[1183_1189_1177_1178];|O94964|[1183_1189_1209_1210]
TDFTGTIKF	|P02786|[138_145_116_116];|P02786|[138_145_140_140]
IRNGSEVRV	|P06239|[38_45_19_19];|P06239|[38_45_28_28];|P06239|[38_45_44_44];|P06239|[38_45_49_49];|P06239|[38_45_66_66]
VHDGPTEIY	|Q5T9L3|[510_511_526_532]
QQGSRPNFV	|Q8IWI9|[980_985_953_955]
HDQLRHGVA	|O43765|[16_22_34_35]
FAKPLISRT	|Q01814|[920_921_944_950];|P20020|[948_949_921_927];|Q16720|[894_895_918_924];|P23634|[885_886_909_915];|P23634|[936_937_909_915]
KDFLRIAGI	|Q96NE9|[553_560_530_530];|Q96NE9|[553_560_548_548];|Q96NE9|[553_560_558_558]
LRPDINVDV	|Q9H6R4|[155_155_173_180];|Q9H6R4|[167_167_173_180];|Q9H6R4|[168_168_173_180];|Q9H6R4|[182_182_173_180];|Q9H6R4|[189_189_173_180];|Q9H6R4|[195_195_173_180];|Q9H6R4|[205_205_173_180]
DFDAIPHVK	|Q9NR97|[543_545_528_533]
STKTIARKH	|Q96IX9|[75_80_59_61]
MSEDDLTAY	|Q6A1A2|[338_342_331_334];|O15530|[365_369_358_361]
KISFGPKNR	|P34932|[44_44_39_46];|P34932|[53_53_39_46];|P34932|[61_61_39_46];|P34932|[68_68_39_46]
LAPDKPRHI	|Q9NW15|[603_604_614_620];|Q9NW15|[609_610_614_620];|Q9NW15|[624_625_614_620]
RDNAKKVAF	|O95347|[644_644_634_641];|O95347|[648_648_634_641]
YADPVNHYA	|O95758|[226_231_233_235]
PEEIAELSY	|Q96QB1|[1378_1381_1352_1356]
KTYAFGIRP	|O60331|[134_137_148_152];|Q99755|[140_143_154_158];|A2A3N6|[87_90_101_105]
QPAPTEPYR	|Q9NVR5|[247_253_268_269]
EPNDPDIEM	|Q9BVG4|[9_10_31_37]
SHEGHVFTF	|P18754|[256_261_251_253]
RDVPHNVQV	|Q9H1A4|[1226_1226_1244_1251];|Q9H1A4|[1267_1267_1244_1251]
ATVTRILRH	|P40306|[116_123_105_105];|P40306|[116_123_132_132]
KPENNVQKI	|B1AJZ9|[1200_1201_1189_1195]
KRKTVTTKI	|F8W1W9|[190_193_177_181];|A6NHN6|[175_178_162_166];|C9JG80|[175_178_162_166];|O75200|[175_178_162_166];|A6NJU9|[175_178_162_166];|E9PJ23|[193_196_180_184];|A6NJ64|[156_159_143_147];|E5RHQ5|[175_178_162_166];|A8MRT5|[175_178_162_166];|Q92617|[175_178_162_166];|E9PQR5|[193_196_180_184]
AQNRHLTSR	|P35222|[481_483_469_474];|P14923|[472_474_460_465]
DAFRNINKI	|Q8TD57|[2571_2575_2557_2560]
TGRYPEVNR	|Q9UER7|[249_251_264_269];|Q9UER7|[249_250_263_269]
LYEALSEEF	|O43149|[1351_1353_1366_1371]
NQDKLLVDY	|Q8NG31|[1966_1973_1946_1946];|Q8NG31|[1966_1973_1996_1996]
KFRPGEKTF	|Q9BZM5|[42_46_58_61];|Q5VY80|[42_46_58_61];|Q6H3X3|[42_46_58_61]
VRKLVQRIV	|Q9P107|[296_300_290_293]
REQLKVHGF	|O60739|[90_90_106_113]
KVKKETKRP	|Q8IY21|[1175_1178_1155_1159]
RDHPHIVKL	|Q05397|[465_465_479_486];|Q05397|[476_476_479_486];|Q05397|[508_508_479_486]
TYSEFAREL	|O43663|[578_583_598_600]
SVLDYFDRT	|O75586|[28_33_42_44]
RSFETFSSR	|Q502W7|[84_87_61_65]
KIPEFSRKL	|Q5VT97|[519_520_537_543]
SVNELLRYK	|Q13129|[755_760_770_772];|Q13129|[755_759_769_772]
KDNEHLKRS	|Q9BXS6|[289_293_270_273]
DFFDKITSR	|P23921|[32_33_15_21]
KIRNKTFTK	|Q9NRC6|[76_79_58_62]
IPDYTYRTD	|Q8NBE8|[305_309_328_331]
RQKPPLLHR	|Q9NRL2|[11_15_3_6];|Q9NRL2|[11_14_2_6]
QTKPVYRVY	|P46100|[2156_2161_2150_2152]
DSYEKIRTF	|Q9GZZ9|[49_50_68_74]
ERNRKSVQR	|O14983|[109_111_134_139];|P16615|[109_111_134_139]
RYRELPRAK	|Q14236|[66_68_40_45]
PASGADEAP	|Q8TEQ8|[697_697_722_729];|Q8TEQ8|[699_699_722_729];|Q8TEQ8|[700_700_722_729];|Q8TEQ8|[709_709_722_729];|Q8TEQ8|[729_729_722_729];|Q8TEQ8|[730_730_722_729];|Q8TEQ8|[744_744_722_729]
TTGGIRAPS	|Q15714|[298_302_294_297]
APPSSLVSL	|Q9BWH6|[866_869_869_873];|Q8WXI7|[8861_8861_8852_8859]
NTDGSNTAL	|Q14766|[1683_1687_1709_1712]
GNPGSDVTF	|Q10571|[872_877_846_848]
ATLLLGVRG	|O14594|[123_128_143_145]
SGPDLSARV	|Q6UXD5|[608_612_589_592]
VDGTPALAY	|Q8IV08|[315_316_285_291]
EGGRLLSAL	|Q6ZMI3|[6_9_25_29]
AGFPEARGL	|P43250|[281_287_298_299]
SSGPGLMLR	|Q9Y566|[860_861_881_887]
DTGIPDSAF	|P56192|[609_613_630_633]
TDSFVAVGK	|Q5UIP0|[477_477_484_491];|Q5UIP0|[480_480_484_491];|Q5UIP0|[513_513_484_491]
TSTVPRVGL	|Q9NV12|[59_61_75_80]
ASKAAQRQA	|Q9H1E3|[96_100_92_95]
LSRDSKGGL	|Q96EY5|[162_165_178_182]
PLPGTDTSF	|Q9Y4A8|[286_289_256_260];|Q9Y4A8|[286_288_255_260]
SVYGSLASR	|Q01581|[348_355_369_369]
IYGATAIFS	|Q7Z408|[2655_2655_2676_2683];|Q7Z408|[2656_2656_2676_2683];|Q7Z408|[2663_2663_2676_2683];|Q7Z408|[2670_2670_2676_2683];|Q7Z408|[2681_2681_2676_2683]
GSFSGVRKI	|Q5QJ74|[123_130_146_146]
KADGLVSDF	|A0M8Q6|[43_46_29_33]
ATASFIRST	|Q8N6H7|[88_90_61_66]
KSIPLRATA	|Q8NEY1|[756_758_784_789]
SDPDVVNVI	|P51805|[1707_1711_1726_1729]
RVRGPKGVT	|Q00839|[484_490_514_515]
TTSDKLARS	|Q12888|[1740_1746_1748_1749]
VAAVREAIR	|Q8NFU7|[1446_1451_1463_1465];|P38567|[272_274_282_287]
SRSSPLNLI	|Q8IXB3|[130_133_118_122]
AEALPKQSF	|P20290|[166_173_197_197]
QELVRAAGF	|O95786|[595_597_574_579]
SVPREGYPS	|Q9ULJ7|[1380_1383_1395_1399]
TFDPWGPSS	|Q8IYW4|[44_45_28_34]
NNIKPINSV	|Q7RTV5|[186_188_201_206]
KSNNPAVIR	|Q8ND90|[218_223_213_215]
ADSVRASFF	|O43760|[142_147_152_154]
FASIGLHVR	|Q6UWJ1|[560_567_552_552]
KALSQALRL	|Q8IZQ5|[68_68_53_60];|Q8IZQ5|[73_73_53_60]
EGGDAEFLY	|Q9BXP2|[857_862_870_872]
TDQVAMKLT	|Q13201|[325_328_332_336]
TTKSLFVGR	|Q9BZE4|[201_208_190_190];|Q9BZE4|[201_208_216_216];|Q9BZE4|[201_208_233_233]
RTLALPPSR	|O15240|[553_555_569_574]
LRSGVIVRI	|Q92621|[1574_1581_1566_1566];|Q92621|[1574_1581_1579_1579]
LTKVVRLGM	|Q96SU4|[388_392_383_386];|Q96SU4|[388_391_382_386]
PPRVAEVSY	|Q8WW18|[53_58_68_70]
IVCTHVVSY	|O15516|[369_373_375_378];|Q99743|[344_348_350_353]
REGHPVQSL	|Q5VSG8|[118_121_95_99]
PDDYATVTF	|Q8N6S4|[528_531_508_512]
ATTRILNEL	|Q5JV73|[411_413_387_392]
KDFIAGRLL	|Q6UXS9|[262_266_243_246]
KSIESLRNS	|Q8NEZ2|[9_10_33_39]
RTGPRPPRP	|Q76KP1|[578_580_569_574];|Q12894|[38_40_56_61]
YTSPNVRTV	|Q96JM2|[932_938_950_951]
YASENVNKI	|Q9H0U4|[109_116_84_84];|Q9H0U4|[109_116_85_85];|Q9H0U4|[109_116_106_106];|P62820|[112_119_87_87];|P62820|[112_119_88_88];|P62820|[112_119_109_109]
PNDEISMYA	|Q8IYD8|[2036_2038_2007_2012]
SRHSKALKI	|Q92974|[343_350_323_323];|Q92974|[343_350_366_366]
SQTPVLRIE	|Q9Y5T5|[215_221_236_237]
KSQLVEKGR	|Q8IYE1|[367_369_373_378]
VQRPPRQTA	|Q63HR2|[486_493_484_484];|Q63HR2|[486_493_496_496]
FINSSTKTR	|Q14678|[748_748_727_734]
LDHPHTHVV	|O60563|[127_127_151_158];|O60563|[133_133_151_158];|O60563|[136_136_151_158];|O60563|[141_141_151_158];|O60563|[144_144_151_158];|O60563|[148_148_151_158];|O60563|[163_163_151_158];|O60563|[170_170_151_158];|O60563|[182_182_151_158];|O60563|[184_184_151_158]
AEVKGWVDR	|Q9UJQ1|[93_97_110_113]
HRSPVLRLS	|Q9C073|[211_213_202_207];|Q9C073|[211_212_201_207]
VRAEVEQKI	|Q8IX12|[1047_1054_1025_1025];|Q8IX12|[1047_1054_1069_1069]
NRNAQTKQI	|A1XBS5|[8_15_33_33];|A1XBS5|[8_14_32_33]
REPAARHLQ	|Q5T953|[103_109_92_93];|Q5T953|[103_109_122_123];|Q5T953|[103_108_121_123]
EEGSLWTTY	|Q96DV4|[209_215_205_206]
KYFSRKVGT	|P11717|[2214_2215_2203_2209]
TGSQLYVYR	|Q10570|[12_13_36_42]
RGQDFLKEV	|Q99666|[364_365_367_373];|P0DJD1|[363_364_366_372];|P0DJD0|[355_356_358_364];|O14715|[364_365_367_373]
GNLRLYPMK	|Q6PJI9|[595_600_586_588]
IRTDFAQKL	|Q5VZK9|[238_238_259_266];|Q5VZK9|[281_281_259_266]
REPEPHILL	|P33552|[44_44_61_68];|P33552|[45_45_61_68];|P33552|[70_70_61_68];|P33552|[71_71_61_68];|P61024|[44_44_61_68];|P61024|[70_70_61_68];|P61024|[71_71_61_68]
RDFPHSNHV	|Q86Z02|[506_506_525_532];|Q86Z02|[544_544_525_532];|Q86Z02|[545_545_525_532];|Q9H422|[513_513_532_539]
RDHPVIKVF	|Q15386|[998_998_989_996];|Q15386|[1009_1009_989_996];|Q15386|[1020_1020_989_996]
VYSQILRKI	|Q9BW27|[63_70_54_54];|Q9BW27|[63_70_56_56];|Q9BW27|[63_70_57_57];|Q9BW27|[63_70_67_67];|Q9BW27|[63_70_78_78];|Q9BW27|[63_70_85_85]
SVNELLRKY	|P49959|[98_100_77_82]
KEYEKGRAF	|Q9Y5A7|[250_252_241_246]
RLREGQTRI	|O00165|[118_124_139_140]
RDLLKVKKF	|Q9UN37|[409_409_422_429];|Q9UN37|[415_415_422_429]
KSFDYVNKF	|P04114|[2428_2432_2416_2419]
RELERITKL	|Q9ULT8|[2222_2222_2237_2244];|Q9ULT8|[2240_2240_2237_2244];|Q9ULT8|[2260_2260_2237_2244]
SSYLRIRHE	|Q8N8Z8|[627_632_604_606]
SHYEFKHSR	|Q04446|[202_203_184_190];|Q04446|[208_209_184_190]
KACGKAPPGE	|P22102|[557_562_579_582]
FAGDLVRGVA	|Q86XP3|[609_615_596_598]
NYAGIGGLRS	|Q9Y490|[1115_1119_1126_1130]
KINGKVAEVG	|P23921|[158_165_176_177]
KTGTLRASGQ	|Q96DZ5|[306_311_319_322]
VTKNVSKPVG	|Q9Y3U8|[17_24_9_10]
ASKDLKVKVG	|P0C0S5|[73_80_47_48];|Q71UI9|[73_80_47_48]
KAISFVGGKR	|Q02252|[255_261_277_279]
SSHLKAHRAG	|O95600|[288_295_279_280]
ASKPLHVRVG	|Q13506|[59_66_56_57]
PGQPPVPLTY	|P50995|[153_160_151_152]
TPDPSTPSRI	|Q9NNW5|[819_827_816_816]
RFYGGAPQAL	|O95782|[843_844_846_853]
KTLPGPKARL	|Q8IWZ6|[59_65_67_69]
LPPDLPMHPA	|Q9UHP3|[531_532_529_536];|Q9UHP3|[531_531_528_536];|Q9UHP3|[545_545_528_536];|Q9UHP3|[548_548_528_536];|Q9UHP3|[552_552_528_536]
AYKNVVGGRQ	|P27348|[47_55_32_32];|P27348|[47_55_67_67];|P27348|[47_55_77_77]
VPRDGGTYEV	|Q5VST9|[158_158_176_184];|Q5VST9|[160_160_176_184];|Q5VST9|[184_184_176_184];|Q5VST9|[200_200_176_184];|Q5VST9|[201_201_176_184]
SVKTIHSTGY	|O00327|[257_259_281_287]
SDLKPPALRP	|Q7Z6B7|[1032_1033_1050_1057]
SGANSIFFRT	|Q13895|[335_341_367_369]
SVKKELGRAL	|Q9NPA8|[82_87_75_78]
FPDPAHPNTI	|Q9UP52|[202_210_179_179]
LMDKPLTFGS	|Q86V25|[215_222_205_206]
DHPASEPLVF	|Q9H6Y7|[301_306_328_331]
KVIKEQGLKA	|O00451|[435_438_407_412]
AQARHPLTRS	|Q8NCJ5|[248_254_256_258]
HAAVDCRFIN	|P98170|[67_71_90_94]
YSNPDVPVYV	|Q92545|[871_874_858_863]
KAPSCHLRLE	|Q05BV3|[34_34_6_14]
ADSIRICDCY	|Q9UK32|[558_565_583_584]
FDDDDGTLNR	|Q99828|[117_120_120_125];|Q99828|[117_119_119_125];|Q99828|[115_116_118_125];|Q99828|[117_118_118_125]
EQKRAVREGT	|Q96C12|[275_276_294_301]
RESPAKIHVF	|Q7KZF4|[769_770_755_762];|Q7KZF4|[731_731_754_762];|Q7KZF4|[732_732_754_762];|Q7KZF4|[747_747_754_762];|Q7KZF4|[749_749_754_762];|Q7KZF4|[769_769_754_762];|Q7KZF4|[776_776_754_762];|Q7KZF4|[787_787_754_762]
TAADDFRVKY	|P05783|[144_144_160_168];|P05783|[170_170_160_168];|P05783|[192_192_160_168]
FPDVPDKEFN	|Q8NG31|[256_263_241_242]
VGRLITNERR	|Q96AY3|[95_100_112_115]
YDLLRPRPGQ	|Q8TE02|[302_303_283_290]
KQLEDGRTLR	|P62987|[48_56_42_42];|P62987|[48_56_54_54];|P62987|[48_56_72_72];|P62987|[48_56_74_74];|P62979|[48_56_42_42];|P62979|[48_56_54_54];|P62979|[48_56_72_72];|P62979|[48_56_74_74];|P62979|[48_56_80_80];|P0CG47|[48_56_42_42];|P0CG47|[48_56_54_54];|P0CG47|[48_56_72_72];|P0CG47|[48_56_74_74];|P0CG47|[124_132_118_118];|P0CG47|[124_132_130_130];|P0CG47|[124_132_148_148];|P0CG47|[124_132_150_150];|P0CG47|[…
LGARYYIQSR	|Q92630|[395_399_382_386]
QEEQDSLSYE	|Q01850|[368_375_360_361]
PDKREEALHF	|A6NN92|[55_59_47_51]
IPIENDVYKY	|P61764|[232_232_258_266];|P61764|[259_259_258_266];|P61764|[271_271_258_266];|P61764|[289_289_258_266]
HPDTSYYIYR	|Q9BSK4|[386_393_395_396];|Q96JP0|[334_341_343_344]
TSSTTHTTST	|P98088|[3860_3864_3883_3887];|P98088|[3908_3912_3883_3887]
RVKGGGHVAR	|P62249|[71_79_45_45];|P62249|[71_79_62_62];|P62249|[71_79_69_69];|P62249|[71_79_71_71];|P62249|[71_79_85_85]
GASPDFSRVL	|Q3KNT9|[46_52_70_72]
AVLKVLNAAR	|O95336|[210_213_192_197]
LPSPHALPPH	|Q6ZVC0|[307_309_292_298]
KSLPAVAQRP	|Q5JVS0|[96_100_102_106]
AAFDGHLREA	|Q3MIP1|[482_487_472_475]
LDAKKAGELF	|P57057|[360_368_338_338];|P57057|[360_368_346_346];|P57057|[360_368_348_348];|P57057|[360_368_372_372];|P57057|[360_368_378_378];|P57057|[360_367_337_338];|P57057|[360_367_347_348];|P57057|[360_367_371_372]
LDAKKAGEIF	|P57057|[360_367_377_378]
SVKKELLGRA	|Q9NPA8|[82_88_75_77]
ARFSGSVNIY	|Q86V15|[469_474_461_464]
KLPGQEGKKE	|Q7Z2K8|[641_647_660_662]
SQKHSVAFSK	|Q4KMQ1|[696_697_663_670]
DGHVYHTKPA	|Q08357|[340_346_370_372]
RGGDAIIRHF	|Q8WUJ3|[797_800_779_784]
KQTALVELIK	|P02768|[549_556_547_548]
HCSLVRSLEE	|Q9BTT6|[21_25_36_40]
CNFQTGLYKV	|Q9H8H0|[71_76_45_48]
VVQCKPLKYK	|Q13219|[888_889_880_887]
GMPGAGEPGF	|P08572|[932_935_961_966]
KIGAPPPARV	|Q14807|[32_35_39_44]
AAYAGSLVRL	|Q9Y6R7|[2201_2207_2195_2197];|Q9Y6R7|[3402_3408_3396_3398]
GQQAAILKVV	|Q9Y520|[232_236_213_217]
KSTQLPGRTG	|Q9H8K7|[278_284_260_262]
VSSMVLTGRP	|P11142|[119_125_99_101]
GTQEKHAPLA	|Q13895|[41_42_13_20]
KLGGSLAHLR	|Q9C0C2|[442_448_417_419];|Q9C0C2|[442_447_416_419]
VLLGWAGGRQ	|P17342|[13_18_40_43]
GVAARALSRR	|Q6ZS82|[123_130_109_110]
KTASRQSKGP	|P37288|[250_258_228_228];|P37288|[250_258_274_274]
AGLAQLTLER	|Q9BV73|[2385_2387_2361_2367]
QAEEALEMAS	|Q9H999|[245_246_232_239]
KKEDVTGVTI	|Q6XZF7|[43_49_59_61]
HSGGILVHRQ	|P06870|[34_35_51_58]
EELPLGALYT	|Q8WV48|[96_97_66_73]
NPNHAIVQTL	|P18075|[387_388_375_382];|P22004|[469_470_457_464]
IPDYTAYVAM	|P18848|[204_205_196_203];|P18848|[188_188_195_203];|P18848|[204_204_195_203];|P18848|[208_208_195_203];|P18848|[221_221_195_203]
IPIDPNEPTY	|Q9UK53|[348_348_347_355];|Q9UK53|[367_367_347_355];|Q9UK53|[376_376_347_355]
CLYRPVTSSF	|Q86VD1|[267_271_277_281]
ERGTPKLHVF	|Q8N988|[98_100_119_125]
VGKEIKRYES	|O15212|[76_78_86_92]
AATGPGVTRQK	|Q6NV74|[812_817_829_833]
SGGSSYDLTPL	|P11717|[347_352_340_344]
VSLAPEAGSRL	|P12111|[1762_1765_1733_1739]
ASKLPNSVLGR	|Q9NZN4|[509_510_480_488]
LPDLGGPETPY	|Q6NY19|[10_16_37_40]
KNSISSINVIS	|O43313|[405_413_380_381];|O43313|[405_413_408_409]
TGFGATSLQQR	|Q96MX6|[85_86_73_81]
YPSLGAGYPRS	|Q8IVL0|[763_764_758_766];|Q8IVL0|[763_763_757_766];|Q8IVL0|[781_781_757_766]
VDNPHVCTSTV	|P00533|[769_775_783_786]
ALLNGTIKDNI	|Q92887|[738_740_712_719]
KTKEAAVRGVR	|A8MT69|[27_29_48_55]
SALGFGDKFKR	|P49790|[766_767_784_792]
LHMSEEEAGIL	|Q86TI0|[902_909_898_900];|Q86TI0|[902_908_897_900]
AVIPRTPSSFR	|P57740|[28_28_51_60];|P57740|[36_36_51_60]
VYSLSEGVELH	|Q5T9Z0|[129_132_122_128]
HAEAFRLPTAE	|O14908|[61_61_87_96];|O14908|[66_66_87_96];|O14908|[105_105_87_96]
KVKSLNDITAR	|P48047|[88_97_64_64];|P48047|[88_97_85_85];|P48047|[88_97_100_100];|P48047|[88_97_117_117]
SVIPRTPSSFR	|P57740|[27_27_51_60];|P57740|[37_37_51_60];|P57740|[57_57_51_60];|P57740|[58_58_51_60];|P57740|[67_67_51_60];|P57740|[69_69_51_60];|P57740|[77_77_51_60];|P57740|[86_86_51_60]
TSYPVDVVKSR	|Q8N8R3|[198_199_208_216]
EELQISPVSPR	|Q92529|[492_495_478_484]
RVVDGKDLTTR	|Q9BXW9|[185_194_174_174];|Q9BXW9|[185_194_185_185]
FSKQVDRVIAD	|O15498|[101_107_79_82]
KPMPLLSLHSR	|P54368|[23_24_34_42]
LAEQAERYDLV	|P31946|[14_22_8_9];|P62258|[13_21_7_8];|P61981|[13_21_7_8];|P63104|[12_20_6_7];|P62258|[13_20_6_8]
HVDQDLTTYHP	|Q00534|[100_108_73_74]
HPERYISRRLL	|Q9UDR5|[287_294_318_320]
KNRKALAAGGK	|O15417|[1675_1681_1652_1655]
IPDKTLILGGH	|Q9H269|[721_724_702_708]
VGTEGRPTVNR	|Q8IY63|[214_215_230_238]
VSTPEGVIKQR	|Q8TEU7|[798_799_801_809];|Q9Y4G8|[655_656_658_666]
VDHEKSHSNLG	|P10912|[343_343_369_378];|P10912|[379_379_369_378]
TSLDGNQLQRV	|Q8NBS3|[794_801_803_805]
AREPLLSLHSR	|P54368|[16_18_35_42]
LMTHPQILTNK	|Q03112|[340_347_333_335]
RILQTGQERAR	|Q9HD33|[175_176_156_164]
KWKSGKDLTRK	|Q01105|[172_180_192_193]
KGFSGPKGGKG	|A8TX70|[1454_1462_1439_1440];|A8TX70|[1454_1462_1451_1452];|A8TX70|[1454_1462_1454_1455];|A8TX70|[1454_1462_1460_1461];|A8TX70|[1454_1462_1484_1485];|A8TX70|[1454_1462_1487_1488]
KLHQAVAAGGP	|B4E2M5|[66_74_43_44]
ATKSQGALARG	|Q9H6H4|[137_145_124_125]
VQHATATTSTA	|Q9H2X6|[187_189_164_171]
TAPHIIIRGHA	|P00390|[192_196_169_174]
TAPHILIRGHA	|P00390|[192_198_171_174];|P00390|[192_197_170_174]
VVDGCEMRLSS	|Q2KJY2|[1509_1515_1489_1492]
KRAGLKEEARG	|Q8TDI7|[38_40_7_14]
RTKGTSSFGKR	|P61927|[11_11_2_11];|P61927|[12_12_2_11];|P61927|[20_20_2_11];|P61927|[21_21_2_11]
LPRPSSLDKTQ	|Q86UX7|[213_219_221_224]
SVKEISDINLR	|P00519|[1120_1127_1093_1095]
SGKVFEDAWRS	|Q9Y5B6|[581_587_604_607]
LPDLEGHRTLF	|Q6U841|[14_15_41_49]
LQKQLVCVNTR	|Q9HB15|[385_389_400_405]
YRLDSSVRNSK	|Q9UL63|[362_363_347_355]
SVIPHQKLFRT	|Q96SQ5|[226_234_217_218];|Q8TAU3|[226_234_217_218]
REYEHFKQHEI	|Q92817|[266_275_249_249];|A8MZ36|[221_230_204_204]
EGPGDLPLPPSP	|Q9Y2W3|[320_324_308_314]
HIVDEKIPLANG	|O43150|[602_605_574_581]
TISEAVLISHNH	|Q6IQ20|[171_174_180_187]
KAVEISGTFTHR	|P63010|[711_713_724_732]
KESSLGGKEEKR	|P09630|[198_200_217_225]
KVPCHVRAHTVR	|P56270|[391_396_382_387]
KLKQRVQDLKNG	|O60333|[844_848_829_835]
VVQEGFEAAGHV	|P10636|[131_136_117_122]
QPDSGISSIRFS	|P04843|[269_278_261_262]
ASVTPVLLHDHD	|Q03154|[399_401_368_376]
ERERATVCESAV	|Q9BPX7|[323_329_304_308]
DALARGPGAGAR	|O75973|[50_52_37_45]
KIVFAKPPDQKR	|O60506|[386_386_403_413];|O60506|[394_394_403_413];|O60506|[407_407_403_413];|O60506|[412_412_403_413];|O60506|[414_414_403_413];|O60506|[417_417_403_413];|O60506|[424_424_403_413]
KPLSDLGPYQRR	|Q92993|[404_410_375_379];|Q9H7Z6|[351_357_322_326]
