# Supplementary material for: Mapping the MHC Class I–Spliced Immunopeptidome of Cancer Cells
Source: Oxford University Press journal article supplement (doi:10.1158/2326-6066.cir-18-0424), 2018-11-13
Supplement: 23266066cir180424-sup-204067_2_supp_5137431_ph9zh9.xlsx [file 23266066cir180424-sup-204067_2_supp_5137431_ph9zh9.xlsx]

## Sheet: info
Table S6. List of spliced and non-spliced peptides identified in the MHC-I immunopeptidomes of the two cancer cell lines, whose assigned antigen was not detected in the cell transcriptome.
Here the peptide sequence, the assigned antigen, the location within the antigen, and the alternative antigens and locations (if we allowed intervening sequence lengths longer than 25 residues) are reported for each cell line.

## Sheet: HCC1143
sequence	annotation
GESVACVAL
AGFPEALRG	|P39060|[1150_1153_896_900]
VGLTVHGTR
VGTQVVNSF
SVPGDMLSY
TAFPATVNR
GQNPNLSNR
RTSGTIILR
FRVKTRGGV
HESANILLY
HTIERIPPL
FGGGGGAVG	|P29376|[315_321_99_100]
LSAPVITLK
VGSRKVEVK	|Q5VV67|[1317_1320_1054_1058]
HAANPENQF
STKTIARKH
YRSSAFRQS	|Q96N22|[516_519_374_378]
SVLRVEDQR	|Q8WZ42|[1937_1940_25595_25599]
RYRELPRAK
SRSSPLNLI	|Q9ULS6|[463_467_260_263]
LDFSKVTEI
AEVKGWVDR
KSFDYVNKF
GITDILSRAA
ATRASGILQL
KVIKEQGLKA
KQTALVELIK
PDKREEALHF
AKAGKASFLR
KTASRQSKGP
VVDGDGHSLPP
LPQTVSMKDNV
VYSLSEGVELH
KLHQAVAAGGP
EGPGDLPLPPSP

## Sheet: HCT116
sequence	annotation
SVPGDMLSY
PEGYEAIVP
FGHSVETEA
DVNMVLVNV
EEVEVAPEH
AVIEHLREL	|Q96PX9|[1141_1143_459_464]
HCEKFYLFP
VLSCEVIAV
PANDAYLTA
EAVKATVIL	|Q8IZT6|[2785_2787_1444_1449]
EPVTNSITV	|Q8WXI7|[4502_4507_2744_2746]
VFSDLGEVC
DTHVITDTP
PEGDTYQSL
ENPLDSSVY
DISFYNEVY
EEEKYFIEP	|Q8WZ42|[2047_2050_7948_7952]
APGPVDEAA	|Q8TCU4|[1457_1462_28_30]
VPGPACAEP	|Q8IZ63|[309_313_36_39]
SGIAMIADA
PNYVGADVA
ADADIALLL	|Q14203|[301_303_779_784]
DLSVQAVVV
VDNPDVNVI
DKLIALNEA	|Q5JRA6|[236_238_1330_1335]
PLPEGELAY
VPVCMPVVF
AISEKLIRA
YDLDSAVIL
GMRKLTVLL
KLFNDLALR	|Q9Y5W7|[756_761_233_235]
NPDETDELY
HLGPESVRG
IESIKMGGQ
AREMPPPPP	|Q9UGU0|[1882_1885_1556_1560]
NEDGKIVGY
YDDSLAVIL
SDHDIIIVI
ATPPKIDKY
HESANILLY
ERKEEAFSA	|Q8N3K9|[3484_3488_1335_1338]
SHADDVHALA
GPGPNSWIYY
IETYDVEVVD
HESANILLYE
EPTPAAEDAA
SDPLLVGGTY
GLLDVGNVIR
LREQDPAPGV
KIELAGGLGV
SPRDSTVPSA
GLLDVGNIRV	|P23469|[654_658_257_261]
FLLDGFRSLP
YTDSEKVTEM
EAEEGARGAHG
EVSWLREGTTY
EAAERKAAEAA
AIDSGASLLHL
LHDLGILVVGA
YVDGGSHSMRY
YQDPLDGDRLV
AGEPIASFTDSF
